# Supplementary material for: Global Transcriptional Responses of the Toxic Cyanobacterium, Microcystis aeruginosa, to Nitrogen Stress, Phosphorus Stress, and Growth on Organic Matter
Source: PLoS One. 2013 Jul 23;8(7):e69834. doi: 10.1371/journal.pone.0069834 (PMC3720943; doi:10.1371/journal.pone.0069834)
Supplement: Table S1 — Summary of transcriptomic sequencing results. (XLSX) [file pone.0069834.s005.xlsx]

## Sheet: Table S1
Table S1 Transcriptomic sequencing results.
	Number of reads	Number of mapped reads	Number of mapped genes	# mapped/ # total
Low N	21265929	9713354	4204	0.66163
	16585211	7862427	4178	0.657539
	17023451	7967082	4171	0.656437
Low P	17363994	8522522	4173	0.656752
	20184291	10623671	4164	0.655335
	17938546	9010415	4136	0.650929
HMWDOM	13993702	7008696	4127	0.649512
	12393729	5531386	4084	0.642745
	15095239	6044402	4099	0.645105
HMWDOM +N	16520845	7360858	4109	0.646679
	28014796	15418655	4201	0.661158
	23553764	14281952	4164	0.655335
HMWDOM +P	14448116	6033677	4103	0.645735
	15194664	6511955	4133	0.650456
	13084268	6592727	4142	0.651873
Control	13055201	6793715	4132	0.650299
	12967695	8018073	4126	0.649355
	13277124	7250475	4129	0.649827
