# Supplementary material for: Global Transcriptional Responses of the Toxic Cyanobacterium, Microcystis aeruginosa, to Nitrogen Stress, Phosphorus Stress, and Growth on Organic Matter
Source: PLoS One. 2013 Jul 23;8(7):e69834. doi: 10.1371/journal.pone.0069834 (PMC3720943; doi:10.1371/journal.pone.0069834)
Supplement: Table S3 — Differential expression results for the low N treatment compared to the Control treatment. (XLSX) [file pone.0069834.s007.xlsx]

## Sheet: Table S3
Table S3 Differential expression results for the low N treatment as compared to the Control treatment.
MAE Number	Low N [FPKM]	Control [FPKM]	Fold Change	p-value	Gene Function	Functional Category	Sub-Category
10	81.1103	48.6977	1.66559	0.00827126	solanesyl diphosphate synthase	Biosynthesis of cofactors, prosthetic groups, and carriers	Menaquinone and ubiquinone
20	174.167	102.775	1.69464	0.00839095	hypothetical protein	Hypothetical
50	69.3434	31.235	2.22005	0.000160655	hypothetical protein	Hypothetical
70	295.74	119.854	2.4675	1.77009e-10	tetratricopeptide repeat protein	Other categories	Other
80	133.34	76.7772	1.73671	0.000245291	phosphoribosylaminoimidazole carboxylase	Purines, pyrimidines, nucleosides, and nucleotides	Purine ribonucleotide biosynthesis
90	108.427	16.65	6.51213	0	hypothetical protein	Hypothetical
100	71.1577	36.2409	1.96346	1.27503e-06	AMP-dependent synthetase and ligase	Other categories	Other
150	68.6757	104.546	-1.52231	0.00850724	lipoprotein signal peptidase (EC 3.4.23.36)	Cellular processes	Protein and peptide secretion
160	83.631	222.221	-2.65716	0.000328837	putative biotin biosynthesis protein BioY	Other categories	Other
170	120.159	281.522	-2.34291	2.76769e-07	biotin synthetase	Biosynthesis of cofactors, prosthetic groups, and carriers	Biotin
180	43.7092	25.5957	1.70768	0.0049395	dTDP-4-dehydrorhamnose 3,5-epimerase (EC 5.1.3.13)	Cell envelope	Surface polysaccharides, lipopolysaccharides and antigens
190	31.1116	17.9396	1.73424	0.00149163	dTDP-6-deoxy-L-mannose-dehydrogenase	Cell envelope	Surface polysaccharides, lipopolysaccharides and antigens
210	91.4668	219.138	-2.39582	2.45123e-10	3-isopropylmalate dehydrogenase	Amino acid biosynthesis	Branched chain family
220	4993.33	1565.67	3.18926	1.77636e-15	hypothetical protein	Hypothetical
230	74.16	32.8577	2.25701	6.01306e-09	excinuclease ABC subunit C	Other categories	Other
270	575.369	83.1641	6.91848	0	hypothetical protein	Hypothetical
280	333.965	156.151	2.13873	7.36527e-08	low molecular weight phosphotyrosine protein phosphatase	Translation	Protein modification and translation factors
290	190.095	52.8302	3.59823	0	two component transcriptional regulator	Regulatory functions
320	435.545	703.164	-1.61445	0.003315	imidazole glycerol phosphate synthase subunit	Amino acid biosynthesis	Aromatic amino acid family
680	245.506	81.2932	3.02001	6.43929e-15	hypothetical protein	Hypothetical
730	607.579	896.647	-1.47577	0.0219707	hypothetical protein	Hypothetical
820	87.8269	147.88	-1.68377	0.000174423	cobalt transport system permease protein CbiQ homolog	Transport and binding proteins
840	8.27469	106.101	-12.8224	0	hypothetical protein	Hypothetical
920	290.99	2225.14	-7.64679	0	ATP synthase beta subunit	Photosynthesis and respiration	ATP synthase
930	667.801	5266.54	-7.88639	0	ATP synthase F1 sector epsilon subunit (EC 3.6.3.14)	Photosynthesis and respiration	ATP synthase
940	1119.37	4249.48	-3.79631	0	hypothetical protein YCF65	Hypothetical
970	136.66	284.533	-2.08205	2.5477e-07	phospho-N-acetylmuramoyl-pentapeptide-transferase (EC 2.7.8.13)	Cell envelope	Murein sacculus and peptidoglycan
990	1387.71	869.468	1.59604	0.000741782	prevent-host-death family protein	Other categories	Other
1000	3.63476	2.09605	1.7341	0.00203358	hypothetical protein	Hypothetical
1030	32.6732	19.0396	1.71607	0.000946502	hypothetical protein	Hypothetical
1040	280.273	157.814	1.77597	0.00067876	hypothetical protein	Hypothetical
1070	52.19	28.6204	1.82352	9.925e-05	hypothetical protein	Hypothetical
1080	98.6595	64.3129	1.53405	0.00663723	putative bidirectional hydrogenase diaphorase subunit	Other categories	Hydrogenase
1150	1229.25	478.937	2.56662	2.24307e-11	hypothetical protein	Hypothetical
1160	1666.87	641.893	2.5968	1.09633e-09	unknown protein	Unknown
1170	263.024	104.074	2.52728	1.14441e-10	hypothetical protein	Hypothetical
1180	200.867	90.904	2.20966	1.72311e-08	putative amino acid racemase	Other categories	Other
1220	11.3278	5.16366	2.19375	5.23851e-05	probable glycosyl transferase	Other categories	Other
1240	102.758	534.609	-5.2026	0	ferredoxin-thioredoxin reductase variable subunit	Biosynthesis of cofactors, prosthetic groups, and carriers	Thioredoxin, glutaredoxin, and glutathione
1250	11.3553	2.67328	4.2477	9.16626e-05	hypothetical protein	Hypothetical
1260	62.6392	39.9883	1.56644	0.00255941	alpha/beta fold family hydrolase	Other categories	Other
1450	24.804	10.5638	2.34802	0.00574713	transposase	Other categories	Transposon-related functions
1600	177.905	95.0625	1.87145	0.000118406	hypothetical protein	Hypothetical
1680	94.709	42.9558	2.2048	0.0127438	hypothetical protein	Hypothetical
1690	351.187	162.103	2.16644	0.000340482	hypothetical protein	Hypothetical
1710	71.7495	24.9913	2.87098	0.000614534	hypothetical protein	Hypothetical
1750	41.1562	28.1774	1.46061	0.00715132	cation-transporting ATPase	Transport and binding proteins
1800	8.08155	2.45195	3.29597	1.97806e-06	tetratricopeptide repeat protein	Other categories	Other
1820	238.195	948.311	-3.98124	0	enoyl-[acyl-carrier-protein] reductase	Other categories	Other
1830	327.793	217.845	1.50471	0.00332551	global nitrogen regulator Ycf28	Other categories	Other
1840	46.066	22.3092	2.06489	7.27885e-07	hypothetical protein	Hypothetical
1850	109.876	33.5305	3.2769	6.71241e-13	hypothetical protein	Hypothetical
1860	182.205	74.7447	2.4377	1.22687e-09	hypothetical protein	Hypothetical
1870	19.5596	8.43102	2.31996	5.29945e-06	hypothetical protein	Hypothetical
1880	16.053	9.10316	1.76345	0.00165192	serine/threonine kinase	Regulatory functions
1900	143.655	267.791	-1.86413	7.0902e-06	c-type cytochrome synthesis protein Ycf5	Other categories	Other
1910	61.6332	44.6518	1.38031	0.0196302	cell division protein FtsH	Cellular processes	Cell division
1920	31.7309	21.4779	1.47737	0.0160294	hypothetical protein	Hypothetical
1940	350.414	252.042	1.3903	0.023279	hypothetical protein	Hypothetical
1980	37.7322	19.69	1.91631	1.69809e-05	aldehyde dehydrogenase	Energy metabolism	Pyruvate and acetyl-CoA metabolism
1990	29.4746	16.9392	1.74002	0.000303134	hypothetical protein	Hypothetical
2000	79.2203	49.2229	1.60942	0.00130357	hypothetical protein	Hypothetical
2090	712.389	349.024	2.04109	1.10887e-05	argininosuccinate synthetase	Amino acid biosynthesis	Glutamate family / Nitrogen assimilation
2100	88.4333	126.704	-1.43276	0.0102317	two-component sensor histidine kinase	Regulatory functions
2120	8.90256	17.7214	-1.9906	0.000368297	hypothetical protein	Hypothetical
2130	85.1261	256.184	-3.00946	6.78684e-08	phosphoribosylaminoimidazole carboxylase ATPase subunit	Purines, pyrimidines, nucleosides, and nucleotides	Purine ribonucleotide biosynthesis
2140	220.511	687.729	-3.1188	2.43801e-08	hypothetical protein	Hypothetical
2170	40.3406	59.5897	-1.47716	0.00927579	amino acid transport system permease protein	Transport and binding proteins
2380	132.446	63.1489	2.09736	0.00151386	transcriptional regulator	Regulatory functions
2400	57.5895	22.9472	2.50965	2.01863e-07	hypothetical protein	Hypothetical
2470	59.5503	28.0479	2.12316	2.24274e-05	hypothetical protein	Hypothetical
2500	306.079	683.662	-2.23361	1.55188e-08	ribose 5-phosphate isomerase	Energy metabolism	Sugars
2510	806.406	1867.54	-2.31588	2.65102e-08	RNA-binding protein	Other categories	Other
2520	9278.3	187.066	49.5991	0	phycobilisome degradation protein NblA	Photosynthesis and respiration	Phycobilisome
2530	47.0782	20.3355	2.31507	2.34028e-05	hypothetical protein	Hypothetical
2580	11510.2	35329.9	-3.06944	3.77476e-15	hypothetical protein	Hypothetical
2590	156.644	100.715	1.55532	0.00183993	peptidase	Other categories	Other
2620	340.631	850.239	-2.49607	4.28039e-07	phosphoenolpyruvate synthase	Other categories	Other
2680	18.3977	29.4791	-1.60233	0.00261896	precorrin-6y C5,15-methyltransferase (decarboxylating) (EC 2.1.1.132)	Other categories	Other
2700	38.1294	24.9157	1.53034	0.0207451	hypothetical protein	Hypothetical
2790	1017.34	3508.39	-3.44859	3.19744e-14	thioredoxin	Other categories	Other
2800	61.7312	92.9263	-1.50534	0.00341732	acetate kinase	Energy metabolism	Pyruvate and acetyl-CoA metabolism
2820	616.667	430.475	1.43253	0.0168887	RNA polymerase ECF-type sigma-E factor	Transcription	RNA synthesis, modification, and DNA transcription
2890	289.988	1010.95	-3.48618	4.1543e-11	hypothetical protein	Hypothetical
3000	102.566	48.7687	2.10311	9.90402e-08	cell envelope-related transcriptional attenuator	Regulatory functions
3020	66.9803	19.9461	3.35806	2.66797e-10	GCN5-related N-acetyltransferase	Other categories	Other
3040	141.3	97.3601	1.45131	0.00773212	serine phosphatase	Other categories	Other
3050	219.523	560.222	-2.552	1.36604e-11	transposase	Other categories	Transposon-related functions
3060	131.378	286.486	-2.18062	1.57139e-08	transposase	Other categories	Transposon-related functions
3070	129.44	247.995	-1.91591	2.94463e-06	nitroreductase	Other categories	Other
3100	22.2133	6.61505	3.35799	4.40717e-09	unknown protein	Unknown
3110	62.8834	22.4821	2.79704	3.466e-05	transcriptional regulator	Regulatory functions
3130	20.1294	10.7475	1.87294	0.000976327	probable glycosyl transferase	Other categories	Other
3160	17.0486	10.4061	1.63833	0.0126338	GDP-D-mannose dehydratase	Energy metabolism	Sugars
3200	110.137	49.1055	2.24286	9.5477e-09	saccharopine dehydrogenase	Other categories	Other
3210	649.312	392.873	1.65273	0.00264275	two-component sensor histidine kinase	Regulatory functions
3330	17.1113	42.4942	-2.4834	3.78243e-08	hypothetical protein	Hypothetical
3360	123.053	228.663	-1.85825	6.55069e-06	transposase	Other categories	Transposon-related functions
3370	11.9659	17.5846	-1.46956	0.00878002	putative SNF2 helicase	Other categories	Other
3380	20.3534	31.2445	-1.5351	0.0120875	hypothetical protein	Hypothetical
3390	25.441	12.948	1.96486	7.47269e-06	hypothetical protein	Hypothetical
3410	108.137	452.061	-4.18045	0	60 kDa molecular chaperonin 2	Cellular processes	Chaperones
3420	114.258	69.6223	1.64111	0.000431615	ABC-transporter ATP-binding protein	Transport and binding proteins
3470	43.6462	30.3111	1.43994	0.00843225	putative calcium binding hemolysin protein	Other categories	Other
3480	292.328	117.306	2.49201	3.19811e-05	unknown protein	Unknown
3490	83.8806	30.3667	2.76226	0.000474348	unknown protein	Unknown
3510	190.464	59.5723	3.19719	0.000291072	hypothetical protein	Hypothetical
3520	36.8647	16.5159	2.23207	1.01615e-05	hypothetical protein	Hypothetical
3580	18.2332	6.60948	2.75864	0.0116127	hypothetical protein	Hypothetical
3610	6.1428	3.00113	2.04683	6.01882e-05	tetratricopeptide repeat protein	Other categories	Other
3680	188.563	62.7302	3.00594	8.42358e-05	hypothetical protein	Hypothetical
3700	78.0174	18.5815	4.19866	1.23067e-05	hypothetical protein	Hypothetical
3710	87.1765	31.8695	2.73542	0.000254817	hypothetical protein	Hypothetical
3720	34.7635	15.1981	2.28736	0.0153883	unknown protein	Unknown
3730	21.7657	6.62593	3.28493	0.0149969	hypothetical protein	Hypothetical
3750	69.2864	19.5756	3.53943	0.000425486	unknown protein	Unknown
3780	6.36384	3.6596	1.73894	0.000967325	tetratricopeptide repeat protein	Other categories	Other
3790	16.7805	6.99604	2.39857	3.89986e-08	similar to adenylate cyclase	Other categories	Other
3800	14.8503	6.55762	2.26459	0.000123393	hypothetical protein	Hypothetical
3870	21.4437	32.1534	-1.49943	0.0109443	hypothetical protein	Hypothetical
3890	167.572	34.7918	4.81642	0	hypothetical protein	Hypothetical
3900	86.1103	33.0318	2.60689	2.37798e-06	hypothetical protein	Hypothetical
3910	142.005	91.2669	1.55593	0.00190066	cobyrinic acid a,c-diamide synthase	Other categories	Other
3940	49.7257	109.817	-2.20846	1.11806e-08	pyruvate kinase	Other categories	Other
4010	80.8599	196.575	-2.43106	0.0193802	single-stranded nucleic acid binding protein	Other categories	Other
4020	175.902	284.628	-1.61811	0.00194841	inner membrane protein OxaA	Other categories	Other
4030	450.704	656.557	-1.45674	0.0242947	hypothetical protein	Hypothetical
4050	17707.7	31095.2	-1.75603	6.22878e-05	50S ribosomal protein L34	Translation	Ribosomal proteins: synthesis and modification
4070	35.4537	54.5326	-1.53814	0.00783895	HAD-superfamily hydrolase	Other categories	Other
4080	216.476	377.701	-1.74477	5.82023e-05	heat shock protein GrpE	Cellular processes	Chaperones
4090	51.1383	29.5696	1.72942	8.66592e-05	pilus biogenesis protein	Cellular processes	Protein and peptide secretion
4100	142.476	69.0304	2.06396	2.24044e-07	twitching motility protein PilT	Other categories	Other
4110	36.6487	19.9063	1.84106	8.17393e-05	pilin biogenesis protein	Cellular processes	Chemotaxis
4180	119.378	66.8111	1.7868	0.00433244	Txe/YoeB family addiction module toxin	Other categories	Other
4210	112.454	53.8647	2.08771	0.00318801	hypothetical protein	Hypothetical
4260	281.585	137.589	2.04657	0.00246875	hypothetical protein	Hypothetical
4270	43.0403	21.4669	2.00496	0.00384973	hypothetical protein	Hypothetical
4310	134.277	62.6641	2.14281	0.00115495	hypothetical protein	Hypothetical
4320	314.183	67.0083	4.68872	0.0201232	hypothetical protein	Hypothetical
4330	292.801	58.4338	5.01082	2.30021e-08	hypothetical protein	Hypothetical
4470	34.7084	23.0936	1.50294	0.00849524	cytosine-specific DNA methylase	Other categories	Other
4500	43.5141	16.1795	2.68946	0.00273358	hypothetical protein	Hypothetical
4520	42.5446	74.5771	-1.75292	0.000117328	isopentenyl monophosphate kinase	Other categories	Other
4550	13.5921	3.7507	3.62388	0.0175711	camphor resistance protein CrcB homolog	Other categories	Other
4650	502.645	278.359	1.80574	0.0200166	hypothetical protein	Hypothetical
4660	132.59	56.2244	2.35823	1.52597e-08	hypothetical protein	Hypothetical
4670	51.4325	22.8273	2.25311	1.36327e-05	hypothetical protein	Hypothetical
4680	86.2743	124.796	-1.4465	0.00716204	cell division protein FtsY	Cellular processes	Cell division
4690	253.886	108.114	2.34832	1.28474e-09	manganese transport system ATP-binding protein	Transport and binding proteins
4700	379.523	114.552	3.31311	4.44089e-16	hypothetical protein	Hypothetical
4930	102.154	61.8314	1.65214	0.00164117	SixA type phosphohistidine phosphatase	Other categories	Other
4940	93.2133	54.7684	1.70195	0.000139617	hypothetical protein	Hypothetical
5160	273.731	84.0687	3.25604	5.08482e-14	hypothetical protein	Hypothetical
5190	131.538	49.6864	2.64736	2.74489e-06	hypothetical protein	Hypothetical
5210	27.0867	10.417	2.60024	5.26472e-05	hypothetical protein	Hypothetical
5220	42.8081	16.0427	2.66838	1.47984e-07	hypothetical protein	Hypothetical
5290	1127.4	661.165	1.70517	0.000528607	unknown protein	Unknown
5310	432.777	270.537	1.5997	0.00505527	hypothetical protein	Hypothetical
5340	108.659	149.151	-1.37265	0.0216166	L-lactate dehydrogenase	Other categories	Other
5360	19.5818	11.1864	1.7505	0.00827875	cytosine deaminase	Purines, pyrimidines, nucleosides, and nucleotides	Pyrimidine ribonucleotide biosynthesis
5370	13.4837	7.33172	1.83909	0.00925085	FO synthase subunit 1	Other categories	Other
5380	324.735	73.8015	4.40011	0	hypothetical protein	Hypothetical
5390	667.755	333.066	2.00487	0.00396927	unknown protein	Unknown
5400	99.8666	60.2663	1.65709	0.00840755	hypothetical protein	Hypothetical
5420	133.11	81.526	1.63273	0.000944564	cobalamin biosynthesis protein CbiX	Biosynthesis of cofactors, prosthetic groups, and carriers	Cobalamin, heme, phycobilin and porphyrin
5450	197.375	125.776	1.56926	0.00153894	hypothetical protein	Hypothetical
5550	217.769	132.063	1.64898	0.000464565	hypothetical protein YCF36	Hypothetical
5560	262.064	91.9378	2.85045	1.36948e-11	iojap-related protein	Other categories	Other
5570	197.977	62.8989	3.14754	8.43769e-15	hypothetical protein	Hypothetical
5580	31.1467	13.7814	2.26005	1.36413e-07	GTP-binding protein	Other categories	Other
5620	155.645	449.92	-2.89068	5.35127e-14	pyruvate dehydrogenase E1 component beta subunit (EC 1.2.4.1)	Energy metabolism	Pyruvate dehydrogenase
5630	86.1137	191.05	-2.21858	1.16426e-08	protein-export membrane protein SecD	Cellular processes	Protein and peptide secretion
5870	50.2253	28.6717	1.75174	0.000163729	UDP-N-acetylglucosamine 2-epimerase (EC 5.1.3.14)	Cell envelope	Murein sacculus and peptidoglycan
5890	28.6995	16.3527	1.75503	0.000378519	hypothetical protein YCF22	Hypothetical
5990	62.1731	163.395	-2.62807	3.34088e-12	phosphoglycerate mutase	Other categories	Other
6010	112.276	198.992	-1.77235	5.56599e-05	acetolactate synthase	Amino acid biosynthesis	Branched chain family
6020	87.2117	150.242	-1.72273	0.00020328	hypothetical protein	Hypothetical
6090	790.15	1356.09	-1.71624	0.00602128	porin type major outer membrane protein	Cell envelope	Membranes, lipoproteins, and porins
6170	8.81048	5.01727	1.75603	0.0154906	hypothetical protein	Hypothetical
6180	59.913	20.5811	2.91107	1.1964e-09	urea transport system ATP-binding protein	Transport and binding proteins
6190	82.9466	23.1505	3.58293	1.46549e-14	urea transport system ATP-binding protein	Transport and binding proteins
6200	69.3206	25.6736	2.70007	4.75304e-11	urea transport system permease protein	Other categories	Other
6210	39.8282	18.1359	2.1961	7.4706e-07	urea transport system permease protein	Transport and binding proteins
6220	357.397	535.844	-1.4993	0.0120877	ABC-type urea transport system substrate-binding protein	Transport and binding proteins
6230	34.2191	17.9345	1.908	0.00611653	hypothetical protein	Hypothetical
6250	249.023	1106.7	-4.44417	0	hypothetical protein	Hypothetical
6260	59.1683	209.111	-3.53417	0	glycogen synthase	Central intermediary metabolism	Polysaccharides and glycoproteins
6270	617.676	1257.29	-2.03552	2.44307e-07	hypothetical protein	Hypothetical
6280	3768.99	8984.31	-2.38374	7.81691e-09	30S ribosomal protein S15	Translation	Ribosomal proteins: synthesis and modification
6290	441.036	1331.46	-3.01894	3.10862e-15	hypothetical protein	Hypothetical
6300	658.981	1803.74	-2.73717	5.62984e-09	carboxysome formation protein CcmA	Photosynthesis and respiration	CO2 fixation
6350	233.714	89.6192	2.60786	9.33587e-12	HAD-superfamily hydrolase subfamily IIB	Other categories	Other
6360	271.243	114.218	2.37478	7.06677e-10	carboxymethylenebutenolidase	Other categories	Other
6420	578.352	224.079	2.58102	0.00543208	unknown protein	Unknown
6430	736.739	384.944	1.91389	3.41967e-06	hypothetical protein	Hypothetical
6440	79.4406	118.237	-1.48837	0.0129763	chromosome segregation and condensation protein ScpB homolog	Other categories	Other
6590	85.2998	39.9164	2.13696	2.17077e-05	hypothetical protein	Hypothetical
6680	39.0798	18.6213	2.09866	6.12023e-07	putative DNA helicase	Other categories	Other
6690	16.0785	39.212	-2.43878	6.88676e-08	tRNA(Ile)-lysidine synthase	Other categories	Other
6700	115.605	420.599	-3.63824	0	coproporphyrinogen III oxidase, aerobic (EC 1.3.3.3)	Biosynthesis of cofactors, prosthetic groups, and carriers	Cobalamin, heme, phycobilin and porphyrin
6740	72.5283	106.491	-1.46827	0.00627578	LD-carboxypeptidase A	Other categories	Other
6750	222.959	135.663	1.64348	0.00035207	hypothetical protein	Hypothetical
6760	460.06	213.053	2.15937	0.00144641	hypothetical protein	Hypothetical
6770	134.428	63.5564	2.1151	3.19698e-06	cupin domain protein	Other categories	Other
6790	22.2387	9.18862	2.42024	0.00118765	unknown protein	Unknown
6800	319.61	485.606	-1.51937	0.00276269	hypothetical protein	Hypothetical
6830	1119.71	602.156	1.8595	8.91753e-06	thioredoxin M	Other categories	Other
6880	75.7467	117.64	-1.55307	0.00269645	peptidyl-tRNA hydrolase	Translation	Aminoacyl tRNA synthetases and tRNA modification
6890	52.2072	37.0298	1.40987	0.0128128	glycosyl hydrolase, BNR repeat-containing protein	Other categories	Other
6900	113.068	81.7566	1.38298	0.0192126	fumarase	Other categories	Other
6920	85.9279	124.238	-1.44584	0.00732699	putative glutamate--cysteine ligase	Other categories	Other
7000	435.901	278.137	1.56722	0.00669372	hypothetical protein	Hypothetical
7020	5.93476	9.19403	-1.54918	0.015925	hypothetical protein	Hypothetical
7030	129.496	304.366	-2.35039	7.17887e-07	hypothetical protein	Hypothetical
7040	141.732	304.667	-2.1496	4.33969e-06	ATP-dependent Clp protease adaptor protein ClpS	Other categories	Other
7050	77.1011	183.234	-2.37654	3.45395e-10	sulfoquinovosyldiacylglycerol biosynthesis protein SqdX	Fatty acid, phospholipid and sterol metabolism
7070	93.6717	183.556	-1.95957	1.18408e-06	hypothetical protein	Hypothetical
7140	98.609	68.8583	1.43206	0.00948893	DNA photolyase	Other categories	Other
7170	55.7401	121.423	-2.17838	2.88794e-08	anthranilate phosphoribosyltransferase	Amino acid biosynthesis	Aromatic amino acid family
7270	57.7501	90.8998	-1.57402	0.00143984	glutathione synthetase	Biosynthesis of cofactors, prosthetic groups, and carriers	Thioredoxin, glutaredoxin, and glutathione
7310	1094.23	2658.48	-2.42954	6.12558e-09	50S ribosomal protein L9	Translation	Ribosomal proteins: synthesis and modification
7320	105.259	155.046	-1.473	0.00704771	hypothetical protein	Hypothetical
7330	44.349	63.1746	-1.42449	0.0187001	exodeoxyribonuclease III	DNA replication, restriction, modification, recombination, and repair
7350	406.294	716.998	-1.76473	3.68774e-05	unknown protein	Unknown
7360	558.862	859.636	-1.53819	0.00192558	hypothetical protein	Hypothetical
7530	500.395	173.846	2.87838	0.00550272	unknown protein	Unknown
7560	32.5812	80.152	-2.46007	2.91602e-10	NADH-dependent glutamate synthase large subunit	Amino acid biosynthesis	Glutamate family / Nitrogen assimilation
7600	366.874	120.998	3.03207	7.37715e-07	hypothetical protein	Hypothetical
7610	49.6228	16.6199	2.98575	0.000316066	hypothetical protein	Hypothetical
7620	120.471	31.5829	3.81444	0.00148038	hypothetical protein	Hypothetical
7650	378.784	130.146	2.91045	5.19553e-06	hypothetical protein	Hypothetical
7660	127.272	24.0728	5.28696	0.000942984	hypothetical protein	Hypothetical
7710	59.7373	84.6116	-1.41639	0.0154368	esterase	Other categories	Other
7730	28.4813	100.625	-3.53302	0	hypothetical protein	Hypothetical
7800	11.4666	6.44427	1.77935	0.000750556	hypothetical protein	Hypothetical
7810	12.7463	5.2555	2.42533	4.51937e-07	hypothetical protein	Hypothetical
7860	195.118	82.6529	2.36069	1.90468e-09	malic enzyme	Energy metabolism	Pyruvate and acetyl-CoA metabolism
7880	318.812	70.8906	4.49724	0	unknown protein	Unknown
7890	6.48739	2.78843	2.32654	2.77379e-05	HEAT domain protein repeat-containing protein	Other categories	Other
7920	11.5764	3.17363	3.64768	0.000778092	HEAT domain protein repeat-containing protein	Other categories	Other
7950	75.4202	33.7964	2.2316	1.96483e-06	HEAT domain protein repeat-containing protein	Other categories	Other
7970	119.054	55.6848	2.138	6.79615e-07	hypothetical protein	Hypothetical
7990	41.4205	107.282	-2.59007	7.91145e-12	putative peptidase M	Other categories	Other
8010	1153.39	2823.46	-2.44797	1.24856e-09	50S ribosomal protein L21	Translation	Ribosomal proteins: synthesis and modification
8020	2981.45	7464.7	-2.50371	3.54502e-10	50S ribosomal protein L27	Translation	Ribosomal proteins: synthesis and modification
8050	200.341	329.812	-1.64625	0.0241712	hypothetical protein	Hypothetical
8080	98.9806	535.734	-5.41252	0	spermine synthase	Other categories	Other
8090	20.797	11.7082	1.77628	0.000138523	single-strand-DNA-specific exonuclease RecJ	DNA replication, restriction, modification, recombination, and repair
8100	211.435	110.548	1.91261	0.00281945	thiamineS	Other categories	Other
8110	35.2723	20.0115	1.7626	4.66748e-05	exonuclease SbcC homolog	Other categories	Other
8140	351.972	94.8962	3.70902	0	heat-inducible transcription repressor HrcA	Regulatory functions
8170	68.6066	27.2638	2.5164	5.35345e-05	transposase	Other categories	Transposon-related functions
8180	22.9199	14.8389	1.54458	0.0021913	adenine specific DNA methyltransferase	Other categories	Other
8250	591735	21063.6	28.0928	0	CAB/ELIP/HLIP superfamily protein	Other categories	Adaptations and atypical conditions
8260	73.0934	193.907	-2.65287	2.00633e-11	glutamate dehydrogenase (NADP+) (EC 1.4.1.4)	Amino acid biosynthesis	Glutamate family / Nitrogen assimilation
8270	23.0046	69.5916	-3.02512	2.22045e-15	cation-transporting P-type ATPase	Transport and binding proteins
8330	30.5002	19.567	1.55876	0.00278065	DNA methyltransferase	Other categories	Other
8350	98.3187	166.06	-1.689	0.000328336	hypothetical protein	Hypothetical
8360	2814.5	4788.97	-1.70153	0.000258279	hypothetical protein	Hypothetical
8370	110.158	241.014	-2.18789	0.000532926	hypothetical protein	Hypothetical
8390	257.026	477.983	-1.85967	7.71537e-06	hypothetical protein	Hypothetical
8450	43.9649	97.5767	-2.21942	8.43302e-09	putative glycosyl transferase	Other categories	Other
8510	29.6125	13.1008	2.26036	0.00701252	thioesterase superfamily	Other categories	Other
8520	220.118	115.221	1.9104	6.5724e-06	hypothetical protein	Hypothetical
8560	130.25	209.887	-1.61142	0.00250478	hypothetical protein	Hypothetical
8580	22.616	35.7046	-1.57873	0.00363445	polysaccharide pyruvyl transferase	Other categories	Other
8590	114.024	161.793	-1.41894	0.0111016	hypothetical protein	Hypothetical
8800	15.5072	8.07731	1.91985	6.83275e-05	putative 5-oxoprolinase	Other categories	Other
8850	3.88736	11.032	-2.83792	0.00223857	hypothetical protein	Hypothetical
8920	105.088	163.178	-1.55277	0.0108056	putative translation factor	Other categories	Other
9030	60.0793	38.8265	1.54738	0.00371373	hypothetical protein	Hypothetical
9040	216.354	91.1707	2.37307	2.91782e-09	putative carotenoid oxygenase	Other categories	Other
9050	530.825	80.9512	6.55735	0	glutamate--ammonia ligase	Amino acid biosynthesis	Glutamate family / Nitrogen assimilation
9060	10837.5	975.227	11.1128	0	unknown protein	Unknown
9090	248.072	125.472	1.97711	0.0146944	hypothetical protein	Hypothetical
9100	515.47	250.085	2.06118	1.93965e-05	hypothetical protein	Hypothetical
9170	318.642	152.25	2.09289	0.000951878	hypothetical protein	Hypothetical
9180	324.497	122	2.65981	0.000650152	hypothetical protein	Hypothetical
9190	286.891	87.9036	3.2637	1.77636e-15	biopterin transport-related protein BT1 homolog	Other categories	Other
9230	135.369	53.551	2.52785	2.92311e-10	cadmium resistance transporter homolog	Other categories	Other
9270	19.0363	6.57458	2.89544	3.65046e-06	phosphate transport system permease protein	Transport and binding proteins
9280	17.1126	9.52938	1.79577	0.00318317	ABC-transporter periplasmic phosphate-binding protein	Other categories	Other
9300	16.577	5.45948	3.03637	1.58349e-06	sulfate-binding protein	Transport and binding proteins
9310	48.9868	14.1007	3.47407	6.67348e-10	hypothetical protein	Hypothetical
9360	80.0233	49.8601	1.60496	0.00084644	probable glycosyl transferase	Other categories	Other
9380	77.1457	27.487	2.80662	7.09344e-12	transcriptional regulator	Regulatory functions
9530	179.738	248.001	-1.37979	0.0219111	putative DNA methylase	Other categories	Other
9540	181.475	303.129	-1.67036	0.000235017	malate dehydrogenase	Energy metabolism	TCA cycle
9550	2051.22	3137.39	-1.52952	0.00223383	hypothetical protein	Hypothetical
9560	13.185	19.9054	-1.5097	0.00475175	hypothetical protein	Hypothetical
9570	28.142	45.2149	-1.60667	0.00116594	UDP-N-acetylmuramoylalanine--D-glutamate ligase	Cell envelope	Murein sacculus and peptidoglycan
9580	84.8832	53.9794	1.57251	0.00136697	hypothetical protein	Hypothetical
9640	593.867	1339.3	-2.25522	2.24842e-08	hypothetical protein	Hypothetical
9660	26.6948	40.8548	-1.53044	0.0146733	methyltransferase	Other categories	Other
9690	30.382	53.8907	-1.77377	0.000272112	hypothetical protein	Hypothetical
9700	536.987	2488.19	-4.63361	0	ketol-acid reductoisomerase	Amino acid biosynthesis	Branched chain family
9710	33.1619	18.99	1.74628	0.000498382	type IV pilus assembly protein PilM	Cellular processes	Chemotaxis
9790	166.684	81.9824	2.03317	3.42792e-06	ATP-binding protein	Other categories	Other
9840	160.247	70.7094	2.26628	0.00153252	hypothetical protein	Hypothetical
9900	62.6833	25.9386	2.4166	0.000723274	hypothetical protein	Hypothetical
9930	219.236	111.478	1.96663	0.00415897	hypothetical protein	Hypothetical
10050	135.605	195.373	-1.44075	0.00968814	hypothetical protein	Hypothetical
10100	13.7895	6.11758	2.25408	0.000573106	hypothetical protein	Hypothetical
10120	12.5465	5.26027	2.38514	0.00108426	transposase	Other categories	Transposon-related functions
10240	12108.4	105045	-8.67538	0	phycobilisome small core linker polypeptide	Photosynthesis and respiration	Phycobilisome
10260	4800.81	48111	-10.0214	0	allophycocyanin beta subunit	Photosynthesis and respiration	Phycobilisome
10270	3690.84	36105.8	-9.78254	0	allophycocyanin alpha subunit	Photosynthesis and respiration	Phycobilisome
10290	1622.92	504.357	3.2178	4.89186e-11	putative peptidase	Other categories	Other
10300	132.842	68.2959	1.94509	1.91702e-06	periplasmic polyamine-binding protein	Transport and binding proteins
10320	27.248	103.998	-3.81672	0	putative peptidase	Other categories	Other
10330	114.039	775.793	-6.80287	0	hypothetical protein	Hypothetical
10340	1746.24	12014.6	-6.88027	0	hypothetical protein	Hypothetical
10360	30.8712	48.653	-1.576	0.00129926	sodium/solute symporter	Other categories	Other
10970	5.34687	1.38104	3.87163	0.0125005	hypothetical protein	Hypothetical
11070	162.548	364.385	-2.24171	2.28971e-06	hypothetical protein	Hypothetical
11080	33.375	22.2152	1.50235	0.00331743	chromosome segregation protein	Translation	Nucleoproteins
11090	126.899	59.3127	2.13949	8.94748e-08	hypothetical protein	Hypothetical
11100	34.9879	18.1557	1.9271	1.74566e-05	unknown protein	Unknown
11120	34.6615	73.6392	-2.12452	2.36808e-05	putative endoribonuclease	Other categories	Other
11130	26.5966	7.16171	3.71372	6.92773e-05	hypothetical protein	Hypothetical
11190	1567.71	5134.76	-3.27533	3.81777e-10	undecaprenyl-phosphate galactose phosphotransferase (EC 2.7.8.6)	Cell envelope	Surface polysaccharides, lipopolysaccharides and antigens
11220	234.146	571.426	-2.44047	3.05257e-10	hypothetical protein	Hypothetical
11250	190.627	102.915	1.85228	1.03966e-05	6-phosphogluconolactonase	Energy metabolism	Pentose phosphate pathway
11260	41.3792	21.4187	1.93192	0.000402763	FHA domain containing protein	Other categories	Other
11280	263.287	173.997	1.51317	0.01931	serine/threonine protein phosphatase	Regulatory functions
11310	331.903	1840.5	-5.54529	0	30S ribosomal protein S6	Translation	Ribosomal proteins: synthesis and modification
11320	135.142	634.192	-4.69278	0	hypothetical protein	Hypothetical
11350	105.17	449.404	-4.27312	0	hypothetical protein	Hypothetical
11390	955.295	5225.68	-5.47023	0	unknown protein	Unknown
11400	64.7911	255.356	-3.94122	0	hypothetical protein	Hypothetical
11430	1593.84	3848.09	-2.41435	4.25806e-07	light repressed protein A homolog	Other categories	Adaptations and atypical conditions
11760	706.363	1007.15	-1.42582	0.00994136	NADH dehydrogenase subunit 3	Photosynthesis and respiration	NADH dehydrogenase
11770	299.64	436.865	-1.45797	0.0075236	NADH dehydrogenase subunit NdhK	Photosynthesis and respiration	NADH dehydrogenase
11780	157.783	276.843	-1.75458	6.9348e-05	NADH dehydrogenase subunit NdhJ	Photosynthesis and respiration	NADH dehydrogenase
11820	351.104	1413.2	-4.02502	0	cytochrome c550	Photosynthesis and respiration	Photosystem II
11830	3538.66	13908.8	-3.93053	0	hypothetical protein	Hypothetical
11880	720.222	436.045	1.65171	0.000342218	hypothetical protein	Hypothetical
11900	12999.3	62422.2	-4.80197	0	photosystem II PsbK protein	Photosynthesis and respiration	Photosystem II
11910	90.3001	299.624	-3.31809	2.22045e-16	pentapeptide repeat family protein	Other categories	Other
11930	94.1755	146.432	-1.55488	0.00763019	transcriptional regulator	Regulatory functions
11940	59.4618	38.7174	1.53579	0.00338199	hypothetical protein	Hypothetical
11950	122.595	167.792	-1.36867	0.0246619	glutamyl-tRNA(Gln) amidotransferase subunit A	Other categories	Other
12060	21.3989	13.3088	1.60788	0.0167576	hypothetical protein YCF63	Hypothetical
12100	256.78	74.0704	3.4667	0	probable oxidoreductase	Fatty acid, phospholipid and sterol metabolism
12150	169.548	254.499	-1.50104	0.00648417	hypothetical protein	Hypothetical
12190	68.1028	466.214	-6.84574	0	magnesium protoporphyrin IX chelatase subunit H	Biosynthesis of cofactors, prosthetic groups, and carriers	Cobalamin, heme, phycobilin and porphyrin
12330	25.2334	122.955	-4.87271	0	cobalamin synthesis protein cobW homolog	Biosynthesis of cofactors, prosthetic groups, and carriers	Cobalamin, heme, phycobilin and porphyrin
12350	140.307	32.9374	4.25981	0	polysaccharide biosynthesis protein CapD homolog	Other categories	Other
12360	39.2978	64.1098	-1.63138	0.000471245	carotene isomerase	Other categories	Other
12460	162.294	251.704	-1.55091	0.00157899	iron(III)-transport ATP-binding protein	Transport and binding proteins
12470	26.3997	41.827	-1.58437	0.0035271	ribosomal protein S6 modification protein	Translation	Ribosomal proteins: synthesis and modification
12560	4445.45	9789.06	-2.20204	2.56783e-08	phycobilisome small rod linker polypeptide	Photosynthesis and respiration	Phycobilisome
12570	2411.68	4147.43	-1.71973	0.0116973	ferredoxin-NADP oxidoreductase	Photosynthesis and respiration	Soluble electron carriers
12580	105.876	47.3668	2.23524	2.99466e-08	hypothetical protein	Hypothetical
12620	24.381	10.3134	2.36401	0.00130642	unknown protein	Unknown
12690	482.936	177.984	2.71337	1.06541e-11	phosphoadenosine phosphosulfate reductase	Amino acid biosynthesis	Serine family / Sulfur assimilation
12710	36.1749	17.8378	2.02799	0.00350599	hypothetical protein	Hypothetical
12860	76.5449	37.8999	2.01966	3.81813e-05	hypothetical protein	Hypothetical
12910	74.7367	197.141	-2.63781	1.69364e-10	unknown protein	Unknown
12920	290.364	662.18	-2.28052	2.0186e-08	phytoene synthase	Other categories	Other
12950	80.4477	115.515	-1.4359	0.0119076	cation-transporting P-type ATPase	Transport and binding proteins
12960	32.3746	46.2505	-1.4286	0.0111962	sodium/sulfate symporter	Transport and binding proteins
13040	188.541	77.5081	2.43253	7.86726e-10	probable peptidase	Other categories	Other
13050	64.6392	101.003	-1.56257	0.00121776	seryl-tRNA synthetase	Other categories	Other
13090	127.391	628.871	-4.93654	0	peptidyl-prolyl cis-trans isomerase	Translation	Protein modification and translation factors
13150	39.8441	16.1158	2.47236	0.00117288	hypothetical protein	Hypothetical
13230	45.6243	78.9247	-1.72988	0.000159179	phenazine biosynthesis protein	Other categories	Other
13250	173.468	120.303	1.44193	0.00936816	aminopeptidase P	Translation	Degradation of proteins, peptides, and glycopeptides
13260	45.5568	17.9116	2.54342	6.33712e-06	hypothetical protein	Hypothetical
13270	36.6605	11.4988	3.1882	2.28655e-06	hypothetical protein	Hypothetical
13280	28.1315	10.6947	2.63042	2.631e-10	DNA ligase	DNA replication, restriction, modification, recombination, and repair
13310	174.619	400.439	-2.29322	3.62971e-09	hypothetical protein	Hypothetical
13320	99.9264	165.605	-1.65727	0.00157868	hypothetical protein	Hypothetical
13330	73.3142	38.8662	1.88632	0.000986473	hypothetical protein	Hypothetical
13360	50.1362	90.6154	-1.80738	0.000112715	phosphoglycerate mutase	Other categories	Other
13370	140.701	241.715	-1.71793	9.75831e-05	probable phosphoglycerate mutase	Other categories	Other
13460	76.8145	39.3243	1.95336	0.000793605	hypothetical protein	Hypothetical
13500	14.4766	2.42746	5.96368	2.68503e-06	DNA methyltransferase	DNA replication, restriction, modification, recombination, and repair
13510	74.9904	26.9521	2.78236	6.24431e-09	hypothetical protein	Hypothetical
13520	82.4129	46.6298	1.76739	0.000348904	hypothetical protein	Hypothetical
13540	643.605	229.276	2.80712	9.39255e-07	hypothetical protein	Hypothetical
13550	118.893	52.1224	2.28103	0.000132843	hypothetical protein	Hypothetical
13570	181.178	321.591	-1.775	4.20407e-05	pentapeptide repeat family protein	Other categories	Other
13580	22.9609	13.8471	1.65817	0.0114505	hypothetical protein	Hypothetical
13630	60.7826	42.2666	1.43808	0.0107172	monocomponent sodium-dependent glutamate permease GltS	Transport and binding proteins
13650	147.418	246.841	-1.67443	0.000188895	light-dependent NADPH-protochlorophyllide oxidoreductase	Biosynthesis of cofactors, prosthetic groups, and carriers	Cobalamin, heme, phycobilin and porphyrin
13710	35.1182	87.3627	-2.48768	2.10547e-07	abortive infection protein	Other categories	Other
13750	43.1592	82.9841	-1.92274	0.00170676	hypothetical protein	Hypothetical
13770	35.1312	15.592	2.25316	0.000198508	hypothetical protein	Hypothetical
13870	4.60396	1.30529	3.52715	0.0211286	probable DNA methyltransferase	DNA replication, restriction, modification, recombination, and repair
13900	7.94593	19.414	-2.44326	6.22631e-07	cysteine desulfurase	Other categories	Other
13930	9.06053	18.4773	-2.03932	0.000834167	cysteine synthase	Other categories	Other
14130	293.621	159.034	1.84628	0.0115119	hypothetical protein	Hypothetical
14170	18.5672	6.2118	2.98902	6.38495e-08	hypothetical protein	Hypothetical
14180	20.5721	42.5154	-2.06665	1.57221e-06	dihydroorotase	Purines, pyrimidines, nucleosides, and nucleotides	Pyrimidine ribonucleotide biosynthesis
14210	55.1625	40.0712	1.37661	0.0241073	bidirectional hydrogenase hydrogenase subunit	Other categories	Hydrogenase
14220	656.033	179.485	3.65509	0.000492051	unknown protein	Unknown
14260	91.5514	56.3989	1.62328	0.0017761	hypothetical protein	Hypothetical
14280	62.8041	312.944	-4.98286	0	phycocyanin alpha phycocyanobilin lyase related protein	Photosynthesis and respiration	Phycobilisome
14300	54.0877	26.5184	2.03963	3.84995e-06	ABC-transporter ATP-binding protein	Transport and binding proteins
14350	85.3071	124.401	-1.45827	0.0100766	transcription termination factor NusA	Regulatory functions
14360	221.874	494.985	-2.23093	7.27065e-09	YhbC family protein	Other categories	Other
14370	91.9124	64.9973	1.4141	0.012932	cell division protein FtsH	Cellular processes	Cell division
14380	444.002	91.5566	4.84948	0	two-component response regulator OmpR subfamily	Regulatory functions
14400	14320.6	26952.3	-1.88206	0.00155518	hypothetical protein	Hypothetical
14410	77.6487	55.4581	1.40013	0.0157315	two-component sensor histidine kinase	Regulatory functions
14440	109.242	181.841	-1.66457	0.000216417	hypothetical protein	Hypothetical
14470	46.9423	17.5131	2.68041	7.48035e-07	serine/threonine protein kinase	Regulatory functions
14490	443.303	750.58	-1.69315	0.000178537	ferredoxin	Photosynthesis and respiration	Soluble electron carriers
14500	944.718	2186.82	-2.31479	5.25612e-08	hypothetical protein	Hypothetical
14510	283.33	437.21	-1.54311	0.00159129	polypeptide deformylase	Translation	Protein modification and translation factors
14530	52.5457	37.4972	1.40132	0.0170916	serine/threonine kinase	Regulatory functions
14550	162.635	350.097	-2.15265	3.56481e-08	geranylgeranyl pyrophosphate synthase	Biosynthesis of cofactors, prosthetic groups, and carriers	Carotenoid
14560	26.9914	44.5099	-1.64904	0.0122498	hypothetical protein	Hypothetical
14640	37.6063	22.61	1.66326	0.00510431	hypothetical protein	Hypothetical
14730	127.185	242.84	-1.90934	6.08903e-06	outer membrane efflux protein	Other categories	Other
14750	110.405	178.084	-1.61301	0.000840626	thiamine biosynthesis protein ThiG	Other categories	Other
14780	261.708	111.822	2.3404	6.11403e-08	nitrate/nitrite transport system ATP-binding protein	Transport and binding proteins
14790	594.495	103.478	5.74513	0	nitrate/nitrite transport system permease protein	Transport and binding proteins
14800	973.156	236.168	4.12061	1.55431e-15	nitrate transport protein nrtA	Transport and binding proteins
14810	31697.2	5173.86	6.12641	0	unknown protein	Unknown
14820	13.6259	4.0295	3.38154	1.40643e-06	transposase	Other categories	Transposon-related functions
14830	119.685	240.802	-2.01196	4.86464e-07	cysteine desulfurase	Amino acid biosynthesis	Glutamate family / Nitrogen assimilation
14840	205.591	4812.96	-23.4104	0	hypothetical protein	Hypothetical
14870	16.6807	7.12658	2.34063	0.000145239	hypothetical protein	Hypothetical
14890	51.4353	114.048	-2.21731	3.40962e-08	GTPase family protein	Other categories	Other
14900	42.0675	115.535	-2.74642	4.41203e-13	NADH-dependent glutamate synthase small subunit	Amino acid biosynthesis	Glutamate family / Nitrogen assimilation
14930	339.843	4733.12	-13.9274	0	heme oxygenase	Biosynthesis of cofactors, prosthetic groups, and carriers	Cobalamin, heme, phycobilin and porphyrin
14950	87.3206	452.075	-5.17719	0	acyl carrier protein	Fatty acid, phospholipid and sterol metabolism
14960	59.5309	422.661	-7.09986	0	3-oxoacyl-[acyl-carrier-protein] synthase II	Fatty acid, phospholipid and sterol metabolism
14970	75.8329	385.531	-5.08395	0	transketolase	Energy metabolism	Pentose phosphate pathway
15010	41.951	17.9751	2.33384	0.00323872	hypothetical protein	Hypothetical
15020	10.504	4.52051	2.32363	9.24636e-06	hypothetical protein	Hypothetical
15050	17.5888	26.1654	-1.48762	0.0113723	hypothetical protein	Hypothetical
15090	116.658	37.0612	3.14771	6.88338e-14	hypothetical protein	Hypothetical
15120	89.9229	301.445	-3.35226	0	NADH dehydrogenase subunit 5 NdhF	Photosynthesis and respiration	NADH dehydrogenase
15130	220.739	1430.31	-6.47964	0	periplasmic beta-type carbonic anhydrase	Photosynthesis and respiration	CO2 fixation
15140	86.1616	336.686	-3.90761	0	NADH dehydrogenase subunit 4 NdhD	Photosynthesis and respiration	NADH dehydrogenase
15160	86.3311	368.018	-4.26287	0	CO2-hydration protein	Other categories	Other
15220	85.2278	127.539	-1.49645	0.00364296	6-phosphogluconate dehydrogenase	Energy metabolism	Pentose phosphate pathway
15230	279.768	100.797	2.77556	4.79838e-13	hypothetical protein	Hypothetical
15250	13.9102	7.2946	1.90692	0.00411156	putative adenine-specific DNA-methyltransferase	Other categories	Other
15260	11.954	4.96169	2.40926	0.000328254	probable glycosyl transferase	Cell envelope	Surface polysaccharides, lipopolysaccharides and antigens
15280	113.757	59.8476	1.90078	5.54845e-06	WD-repeat protein	Other categories	Other
15370	32.4049	100.386	-3.09786	3.33067e-15	3-phosphoshikimate 1-carboxyvinyltransferase	Other categories	Other
15400	303.747	155.877	1.94863	3.10215e-05	phosphoribosylformyl glycinamidine synthetase II	Purines, pyrimidines, nucleosides, and nucleotides	Purine ribonucleotide biosynthesis
15560	5289.02	8115.9	-1.53448	0.00309808	NifU-like protein	Amino acid biosynthesis	Glutamate family / Nitrogen assimilation
15570	143.606	32.8123	4.37659	0	3-isopropylmalate dehydrogenase	Other categories	Other
15590	237.562	339.268	-1.42812	0.0123463	peptidase S1 and S6, chymotrypsin/Hap	Other categories	Other
15620	19.7198	29.6889	-1.50554	0.00937768	hypothetical protein	Hypothetical
15630	565.023	805.356	-1.42535	0.00997339	unknown protein	Unknown
15640	973.165	3865.85	-3.97245	0	hypothetical protein	Hypothetical
15650	1183.52	2040.3	-1.72393	9.25462e-05	hypothetical protein	Hypothetical
15680	108.336	1072.04	-9.89551	0	hypothetical protein	Hypothetical
15700	3.86131	1.08254	3.5669	0.000105185	hypothetical protein	Hypothetical
15720	440.378	270.188	1.62989	0.00168449	N-acetylornithine aminotransferase	Other categories	Other
15730	43.393	16.4333	2.64055	4.35712e-09	potassium channel	Transport and binding proteins
15750	45.0558	22.0019	2.04781	6.77426e-06	hypothetical protein	Hypothetical
15780	112.458	48.0558	2.34015	1.30627e-09	twitching mobility protein	Cellular processes	Chemotaxis
15790	56.0279	116.463	-2.07866	3.83987e-06	circadian clock protein KaiB homolog	Other categories	Other
15850	30.1296	57.7196	-1.91571	5.37277e-05	glutathione S-transferase	Biosynthesis of cofactors, prosthetic groups, and carriers	Thioredoxin, glutaredoxin, and glutathione
15900	131.238	235.615	-1.79533	2.50546e-05	two-component response regulator OmpR subfamily	Regulatory functions
15950	304.524	152.267	1.99993	1.31497e-05	heat shock protein 70	Cellular processes	Chaperones
15960	123.868	40.2224	3.07958	1.33227e-14	heat shock protein 40	Cellular processes	Chaperones
15970	84.6531	34.8285	2.43057	5.95571e-10	dihydroorotate dehydrogenase	Purines, pyrimidines, nucleosides, and nucleotides	Pyrimidine ribonucleotide biosynthesis
15980	233.872	157.594	1.48402	0.0135131	hypothetical protein	Hypothetical
16000	60.1754	279.166	-4.6392	0	2-phosphosulfolactate phosphatase	Other categories	Other
16140	20.4067	50.1713	-2.45857	7.99115e-07	probable sodium-dependent transporte	Other categories	Other
16180	8.23616	20.1513	-2.44669	0.00170823	hypothetical protein	Hypothetical
16190	111.386	267.679	-2.40317	3.26447e-10	4-hydroxy-3-methylbut-2-enyl diphosphate reductase	Other categories	Other
16230	131.89	3981.94	-30.1914	0	light-independent protochlorophyllide reductase iron protein subunit ChlL	Other categories	Other
16240	65.0281	1879.91	-28.9092	0	hypothetical protein	Hypothetical
16250	61.3139	1427.85	-23.2875	0	light-independent protochlorophyllide reductase subunit ChlN	Biosynthesis of cofactors, prosthetic groups, and carriers	Cobalamin, heme, phycobilin and porphyrin
16280	26.0453	16.6479	1.56448	0.0144809	uridine phosphorylase	Other categories	Other
16300	3.08258	1.21674	2.53347	0.000110965	hypothetical protein	Hypothetical
16310	431.021	251.209	1.71579	0.0219992	hypothetical protein	Hypothetical
16320	455.512	211.859	2.15007	0.000520027	hypothetical protein	Hypothetical
16330	352.024	222.666	1.58095	0.00266058	plasmid maintenance system antidote protein	Other categories	Other
16340	270.333	139.357	1.93986	0.000186158	hypothetical protein	Hypothetical
16410	68.6079	23.1449	2.96428	0.00220186	unknown protein	Unknown
16560	12.6998	6.8547	1.85271	0.0174766	nitrogen regulation protein NifR3 homolog	Other categories	Other
16600	20.8349	13.6638	1.52482	0.0124923	possible ABC-transporter	Other categories	Other
16690	138.107	78.4395	1.76068	4.93843e-05	histidinol dehydrogenase	Other categories	Other
16710	64.4187	178.781	-2.7753	1.76303e-13	biotin carboxylase	Fatty acid, phospholipid and sterol metabolism
16750	83.6103	48.784	1.71389	0.00163917	hypothetical protein	Hypothetical
16760	112.637	51.1066	2.20396	2.5429e-07	hypothetical protein	Hypothetical
16770	61.2947	32.3698	1.89358	5.65306e-06	heat shock protein 70	Cellular processes	Chaperones
16790	21.2858	35.8274	-1.68316	0.000665761	competence-damage inducible protein CinA homolog	Cellular processes	Transformation
16800	24.5548	15.5486	1.57923	0.0214302	hypothetical protein	Hypothetical
16850	322.33	195.752	1.64662	0.000554055	hypothetical protein	Hypothetical
16900	73.0362	47.6995	1.53117	0.00262729	transposase	Other categories	Transposon-related functions
16920	30.4086	196.595	-6.46511	0	superoxide dismutase	Cellular processes	Detoxification
16940	35.8197	123.615	-3.45103	0	homoserine kinase	Amino acid biosynthesis	Aspartate family
17010	322.834	189.789	1.70102	0.00355888	unknown protein	Unknown
17050	324.902	603.151	-1.85641	4.28697e-05	hypothetical protein	Hypothetical
17060	67.9538	246.324	-3.62487	0	threonine synthase	Amino acid biosynthesis	Aspartate family
17100	26.1312	42.5087	-1.62674	0.00297068	hypothetical protein	Hypothetical
17140	73.8296	128.504	-1.74055	5.57823e-05	transposase	Other categories	Transposon-related functions
17170	27.2608	16.2802	1.67448	0.00134809	hypothetical protein	Hypothetical
17200	242.454	73.7702	3.28661	8.88178e-16	hypothetical protein	Hypothetical
17290	469.809	1213.51	-2.58299	2.10041e-07	ferredoxin-sulfite reductase	Amino acid biosynthesis	Serine family / Sulfur assimilation
17300	33.598	20.6464	1.62731	0.000541071	ABC-transporter ATP-binding protein	Transport and binding proteins
17310	358.307	129.478	2.76732	6.27276e-13	peptide methionine sulfoxide reductase	Translation	Protein modification and translation factors
17350	99.6777	42.6305	2.33818	0.0196089	hypothetical protein	Hypothetical
17360	27.2858	11.0537	2.46848	3.15032e-08	unknown protein	Unknown
17370	134.096	90.4876	1.48193	0.0052496	hypothetical protein	Hypothetical
17390	188.292	373.286	-1.98248	1.81636e-06	sulfate adenylyltransferase	Amino acid biosynthesis	Serine family / Sulfur assimilation
17400	145.485	76.0774	1.91233	5.37071e-06	short-chain dehydrogenase/reductase SDR	Other categories	Other
17410	11.2147	4.17084	2.68883	0.000140447	4-hydroxyphenylpyruvate dioxygenase	Other categories	Other
17440	150.19	52.0822	2.88371	3.76366e-13	competence protein ComM homolog	Cellular processes	Transformation
17450	70.3665	25.6155	2.74703	4.24127e-12	hypothetical protein	Hypothetical
17460	104.53	29.5171	3.54134	4.70202e-10	hypothetical protein	Hypothetical
17490	23.0445	12.6567	1.82074	0.0122037	ribosomal large subunit pseudouridine synthase E	Translation	Aminoacyl tRNA synthetases and tRNA modification
17500	128.782	52.7654	2.44065	6.54496e-10	ABC-2 type transport system permease protein	Transport and binding proteins
17510	5.56536	3.12901	1.77863	0.00626868	serine/threonine protein kinase with WD40 repeats	Regulatory functions
17560	73.395	157.643	-2.14787	9.31468e-08	two component transcriptional regulator	Regulatory functions
17590	43.057	13.2551	3.24833	8.88178e-16	phosphoenolpyruvate synthase	Other categories	Other
17640	12.9521	7.96206	1.62673	0.0229556	transcriptional regulator	Regulatory functions
17650	242.069	629.954	-2.60237	7.78355e-12	hydrogenase accessory protein HupE	Other categories	Hydrogenase
17660	305.43	672.622	-2.20221	9.02426e-08	hypothetical protein	Hypothetical
17740	155.092	84.3803	1.83801	1.41699e-05	band 7 protein	Other categories	Other
17750	288.318	201.728	1.42924	0.0179097	hypothetical protein	Hypothetical
17760	236.261	159.251	1.48358	0.00468404	hypothetical protein	Hypothetical
17770	186.649	56.798	3.28619	2.22045e-16	glycosyl transferase group 1	Other categories	Other
17840	661.605	461.312	1.43418	0.0179203	hypothetical protein	Hypothetical
17890	303.774	182.784	1.66193	0.021725	hypothetical protein	Hypothetical
18110	31.7978	19.8737	1.59999	0.000748963	DNA polymerase I	DNA replication, restriction, modification, recombination, and repair
18180	894.645	294.504	3.0378	8.53801e-10	hypothetical protein	Hypothetical
18190	73.05	16.2786	4.48749	1.76445e-05	hypothetical protein	Hypothetical
18210	32.1057	19.2676	1.66631	0.0234831	hypothetical protein	Hypothetical
18220	194.332	84.5949	2.29721	3.85243e-09	hypothetical protein	Hypothetical
18230	609.479	259.073	2.35254	1.18189e-08	hypothetical protein	Hypothetical
18240	50.0764	33.4433	1.49735	0.0194134	cob(I)alamin adenosyltransferase	Biosynthesis of cofactors, prosthetic groups, and carriers	Cobalamin, heme, phycobilin and porphyrin
18280	41.8071	118.206	-2.82741	1.94156e-12	phosphate transport system permease protein	Transport and binding proteins
18290	12.7221	51.1279	-4.01883	6.66134e-16	phosphate transport system permease protein	Transport and binding proteins
18300	22.9389	103.949	-4.53156	0	phosphate transport system permease protein	Transport and binding proteins
18310	20.6583	34.6738	-1.67844	0.0013399	phosphate-binding periplasmic protein	Transport and binding proteins
18340	30.0879	46.6522	-1.55053	0.00577527	phosphate transport ATP-binding protein	Transport and binding proteins
18350	34.1767	58.2418	-1.70414	0.000555546	phosphate transport ATP-binding protein	Transport and binding proteins
18360	37.3872	87.0489	-2.32831	1.109e-08	phosphate transport system permease protein	Transport and binding proteins
18370	54.388	217.159	-3.99277	0	phosphate transport system permease protein PstC homolog	Transport and binding proteins
18380	14.056	47.8176	-3.40194	2.44249e-14	phosphate-binding periplasmic protein	Transport and binding proteins
18390	10.0148	20.6622	-2.06317	7.44568e-05	phosphate transport system substrate-binding protein	Transport and binding proteins
18410	1861.08	209.995	8.8625	0	ferredoxin--nitrite reductase	Amino acid biosynthesis	Glutamate family / Nitrogen assimilation
18450	50.9576	72.5652	-1.42403	0.0145816	glucokinase	Energy metabolism	Glycolysis
18460	74.1474	39.9798	1.85462	0.000429601	hypothetical protein	Hypothetical
18470	69.071	33.5618	2.05802	0.000132716	hypothetical protein	Hypothetical
18490	201.694	29.3097	6.88148	0	hypothetical protein	Hypothetical
18520	212.974	351.183	-1.64895	0.00159682	hypothetical protein	Hypothetical
18530	132.045	298.252	-2.25871	1.59214e-08	IMP dehydrogenase	Other categories	Other
18590	128.637	9697	-75.3827	0	hypothetical protein	Hypothetical
18620	27.6895	19.066	1.4523	0.0101789	putative protein phosphatase	Other categories	Other
18630	76.7637	136.516	-1.77839	3.14928e-05	hypothetical protein	Hypothetical
18640	131.486	82.188	1.59982	0.00083129	amidase enhancer	Other categories	Other
18670	62.3139	41.6769	1.49517	0.00491192	glycosyl transferase group 1	Other categories	Other
18680	1017.39	361.566	2.81384	0.00168739	hypothetical protein	Hypothetical
18740	61.4358	20.8446	2.94732	1.00951e-09	hypothetical protein	Hypothetical
18750	114.641	48.2603	2.37547	1.27905e-07	regulatory protein CII	Other categories	Other
18760	64.3566	27.7954	2.31537	0.0019206	hypothetical protein	Hypothetical
18810	289.065	141.961	2.03623	0.00399211	hypothetical protein	Hypothetical
18820	884.513	482.124	1.83462	0.00236443	unknown protein	Unknown
18840	105.481	170.441	-1.61585	0.000533953	agmatinase	Other categories	Other
18860	59.1081	115.12	-1.94762	0.000245096	putative hydrogenase expression/formation protein HypA	Other categories	Hydrogenase
18870	38.5371	83.5115	-2.16704	6.53807e-07	putative hydrogenase expression/formation protein HypB	Other categories	Hydrogenase
18880	234.381	40.4041	5.80092	0	ABC-transporter substrate-binding protein	Transport and binding proteins
18890	127.58	16.9955	7.50669	0	ABC-transporter permease protein	Transport and binding proteins
18900	56.6915	10.652	5.32215	6.66134e-16	ABC-transporter ATP-binding protein	Transport and binding proteins
18910	757.803	4333.9	-5.71903	0	water-soluble carotenoid protein	Other categories	Other
18920	1375.73	1930.17	-1.40302	0.0209116	hypothetical protein	Hypothetical
18940	45.106	30.9436	1.45768	0.0149221	adenine-specific DNA metylase	Other categories	Other
18990	6.76234	1.55042	4.36162	0.00561595	unknown protein	Unknown
19010	80.7157	145.45	-1.802	0.000109813	hypothetical protein	Hypothetical
19050	18.944	10.4182	1.81836	0.000312683	hypothetical protein	Hypothetical
19100	43.2896	63.798	-1.47375	0.00683528	chorismate synthase	Amino acid biosynthesis	Aromatic amino acid family
19140	1104.8	415.183	2.661	6.7869e-11	hypothetical protein	Hypothetical
19190	40.8649	27.4154	1.49058	0.0186374	unknown protein	Unknown
19200	17.9153	10.2625	1.74571	0.000129612	unknown protein	Unknown
19220	599.334	2932.22	-4.89246	0	cytochrome b6-f complex iron-sulfur subunit (EC 1.10.99.1)	Photosynthesis and respiration	Cytochrome b6/f complex
19230	505.759	2460.24	-4.86445	0	apocytochrome f	Photosynthesis and respiration	Cytochrome b6/f complex
19240	48.2705	71.9621	-1.49081	0.00512518	mannose-1-phosphate guanylyltransferase	Energy metabolism	Sugars
19250	23.4444	16.4222	1.4276	0.0197431	hypothetical protein	Hypothetical
19300	295.462	458.291	-1.5511	0.00160766	chorismate mutase	Amino acid biosynthesis	Aromatic amino acid family
19320	31.5071	16.8235	1.8728	0.000393327	alpha/beta fold family hydrolase	Other categories	Other
19330	61.1861	36.1352	1.69325	0.0203468	peptidase M48	Other categories	Other
19360	159.126	51.9034	3.06581	6.05079e-06	hypothetical protein	Hypothetical
19370	32.1177	175.478	-5.46359	0	transcriptional regulator	Regulatory functions
19380	32.2453	57.6309	-1.78727	0.000451162	hypothetical protein	Hypothetical
19410	11.7541	8.10161	1.45084	0.0232663	hypothetical protein	Hypothetical
19430	22.8151	45.7359	-2.00463	6.56244e-07	isoamylase precursor	Other categories	Other
19460	43.9764	83.3407	-1.89512	1.28589e-05	malonyl coenzyme A-acyl carrier protein transacylase	Fatty acid, phospholipid and sterol metabolism
19470	49.9991	155.432	-3.1087	2.22045e-15	3-oxoacyl-[acyl-carrier-protein] synthase III	Fatty acid, phospholipid and sterol metabolism
19480	126.475	232.272	-1.83651	1.29206e-05	fatty acid/phospholipid synthesis protein PlsX	Fatty acid, phospholipid and sterol metabolism
19490	21.7674	12.8191	1.69804	0.00161708	putative peptidase	Other categories	Other
19540	131.267	54.3855	2.41364	0.0111426	hypothetical protein	Hypothetical
19550	63.7637	40.7259	1.56568	0.002135	hypothetical protein	Hypothetical
19600	363.775	1082.13	-2.97472	1.28786e-14	50S ribosomal protein L25	Translation	Ribosomal proteins: synthesis and modification
19610	599.11	1676.67	-2.7986	8.33084e-09	adenylosuccinate synthetase	Purines, pyrimidines, nucleosides, and nucleotides	Purine ribonucleotide biosynthesis
19620	12730.9	6320.03	2.01437	5.2592e-07	hypothetical protein	Hypothetical
19670	102.106	32.6737	3.12502	1.94132e-06	hypothetical protein	Hypothetical
19680	142.141	93.8331	1.51483	0.00274391	heat shock protein 40	Cellular processes	Chaperones
19740	10.4946	7.1814	1.46136	0.0231852	two-component sensor histidine kinase	Regulatory functions
19750	117.446	68.8229	1.7065	0.000284395	two-component response regulator	Regulatory functions
19770	201.752	142.078	1.42001	0.0111239	hypothetical protein	Hypothetical
19790	306.769	160.352	1.9131	5.67704e-06	hypothetical protein	Hypothetical
19860	40.3416	23.1894	1.73966	0.0026888	AraD-like aldolase/epimerase	Other categories	Other
19870	250.705	393.247	-1.56856	0.00306937	L-argininosuccinate lyase	Other categories	Other
19880	60.4686	94.05	-1.55535	0.00736862	mutator MutT homolog	DNA replication, restriction, modification, recombination, and repair
19890	14.2972	7.35116	1.94489	0.00100372	putative type I restriction enzyme specificity protein	Other categories	Other
19930	221.501	81.7441	2.70969	0.000214185	hypothetical protein	Hypothetical
20050	120.806	65.214	1.85245	7.21718e-05	hypothetical protein	Hypothetical
20130	48.9517	26.8726	1.82162	0.000116609	hypothetical protein	Hypothetical
20160	5140.07	8868.51	-1.72537	0.000277738	unknown protein	Unknown
20180	196.224	302.242	-1.54029	0.00741911	glycogen phosphorylase	Central intermediary metabolism	Polysaccharides and glycoproteins
20210	42.391	90.5763	-2.13669	3.04124e-05	hypothetical protein	Hypothetical
20220	29.1233	96.6864	-3.3199	1.60209e-10	hypothetical protein	Hypothetical
20330	15.3107	33.6193	-2.1958	5.11574e-06	transposase	Other categories	Transposon-related functions
20360	202.38	94.661	2.13794	0.000509022	hypothetical protein	Hypothetical
20370	957.406	461.716	2.07358	5.18659e-06	hypothetical protein	Hypothetical
20450	162.841	82.6793	1.96955	2.14814e-05	hypothetical protein	Hypothetical
20460	131.236	90.2633	1.45392	0.00931678	hypothetical protein	Hypothetical
20520	65.5903	41.1772	1.59288	0.00203842	alpha/beta fold family hydrolase	Other categories	Other
20590	3.40142	1.06564	3.1919	0.0156738	hypothetical protein	Hypothetical
20630	21.9306	13.8507	1.58336	0.00720206	transposase	Other categories	Transposon-related functions
20680	467.149	269.238	1.73508	0.00087882	unknown protein	Unknown
20750	87.2719	48.7571	1.78993	0.00665339	hypothetical protein	Hypothetical
20770	72.4215	102.526	-1.41568	0.0199382	ABC-transporter ATP-binding protein	Transport and binding proteins
20800	69.5965	44.3008	1.571	0.00156597	transcription-repair coupling factor	DNA replication, restriction, modification, recombination, and repair
20820	31.9666	16.1254	1.98238	3.85381e-05	hypothetical protein	Hypothetical
20830	218.777	94.5767	2.31322	4.75449e-09	peptidase M16-like	Other categories	Other
20840	84.677	52.1846	1.62264	0.000520048	processing protease	Other categories	Other
20930	24.804	10.5638	2.34802	0.00574713	transposase	Other categories	Transposon-related functions
20980	37.4499	103.794	-2.77154	9.29612e-12	tryptophan synthase alpha chain	Amino acid biosynthesis	Aromatic amino acid family
21000	60.1932	29.0971	2.0687	2.32565e-06	glycosyl transferase family 2	Other categories	Other
21110	22.3536	43.647	-1.95257	1.67549e-05	ABC-transporter permease protein	Transport and binding proteins
21130	264.881	1287.11	-4.8592	0	hypothetical protein	Hypothetical
21160	6.33978	3.30846	1.91623	0.00726486	AMP-dependent synthetase and ligase	Other categories	Other
21270	1524.09	399.731	3.81279	5.89954e-06	unknown protein	Unknown
21290	25.2226	5.6634	4.45361	0	hypothetical protein	Hypothetical
21300	137.054	86.0777	1.59221	0.00205147	hypothetical protein	Hypothetical
21360	10.7377	3.21275	3.34221	0.00316491	type I restriction enzyme R protein N terminus	Other categories	Other
21380	120.642	60.3346	1.99955	5.18914e-06	5-methyltetrahydrofolate--homocysteine methyltransferase	Amino acid biosynthesis	Aspartate family
21460	54.149	74.1049	-1.36854	0.0242197	histidinol dehydrogenase	Amino acid biosynthesis	Aromatic amino acid family
21600	31902	6797.3	4.69333	2.22045e-16	hypothetical protein	Hypothetical
21620	69.2587	35.0037	1.97861	0.000138125	hypothetical protein	Hypothetical
21640	353.029	3197.34	-9.05688	0	phycobilisome core component	Photosynthesis and respiration	Phycobilisome
21650	19.4206	40.6992	-2.09567	1.86935e-06	glutamate 5-kinase	Other categories	Other
21670	81.0078	314.623	-3.88386	1.9984e-15	hypothetical protein	Hypothetical
21680	64.3786	273.829	-4.25342	4.13547e-09	hypothetical protein	Hypothetical
21690	15.9412	30.7249	-1.92739	7.66627e-06	two-component hybrid histidine kinase	Regulatory functions
21700	66.5344	177.417	-2.66655	1.27043e-11	hypothetical protein	Hypothetical
21720	214.791	96.2896	2.23068	9.22354e-09	putative cystein protease	Other categories	Other
21760	54.6759	78.1016	-1.42845	0.0137146	hypothetical protein	Hypothetical
21870	383.989	51.7576	7.41899	0	type 2 NADH dehydrogenase	Other categories	Other
21880	133.29	24.6446	5.40849	2.38172e-05	hypothetical protein	Hypothetical
21900	25.3108	42.1013	-1.66337	0.00321521	uracil phosphoribosyltransferase	Purines, pyrimidines, nucleosides, and nucleotides	Interconversions and salvage of nucleosides and nucleotides
21980	126.834	66.6348	1.90342	0.00155552	hypothetical protein	Hypothetical
22000	1435.07	3540.52	-2.46714	1.78492e-10	hypothetical protein	Hypothetical
22010	127.127	337.415	-2.65416	2.55396e-12	anion-transporting ATPase	Other categories	Other
22020	93.4058	213.614	-2.28695	2.07768e-09	chlorophyll a synthase (EC 2.5.1.62)	Biosynthesis of cofactors, prosthetic groups, and carriers	Cobalamin, heme, phycobilin and porphyrin
22030	798.728	420.259	1.90056	2.3989e-05	hypothetical protein	Hypothetical
22040	13112.6	5748.95	2.28087	3.91678e-09	CAB/ELIP/HLIP-related protein	Other categories	Other
22050	262.46	112.981	2.32305	2.44132e-09	hypothetical protein	Hypothetical
22070	20.1502	9.84933	2.04584	0.00111027	hypothetical protein	Hypothetical
22100	17.5027	7.72121	2.26683	0.0196375	hypothetical protein	Hypothetical
22160	116.753	393.595	-3.37118	0	two-component response regulator OmpR subfamily	Regulatory functions
22170	18.1233	43.0579	-2.37583	1.94762e-06	hypothetical protein	Hypothetical
22180	13.5044	7.93856	1.70111	0.00805636	transposase	Other categories	Transposon-related functions
22330	105.372	373.602	-3.54555	4.47232e-10	hypothetical protein	Hypothetical
22340	63.341	167.515	-2.64465	6.72337e-08	fructokinase	Other categories	Other
22390	1525.55	655.009	2.32905	2.57998e-09	unknown protein	Unknown
22490	352.563	101.374	3.47784	1.55431e-15	hypothetical protein	Hypothetical
22520	91.8453	54.1874	1.69496	0.0016721	hypothetical protein	Hypothetical
22530	72.2751	47.6857	1.51566	0.0182349	hypothetical protein	Hypothetical
22570	138.756	69.615	1.99319	8.96731e-07	cytochrome P450	Other categories	Other
22640	79.6887	40.9235	1.94726	0.00556631	hypothetical protein	Hypothetical
22650	505.33	203.431	2.48404	6.25317e-09	unknown protein	Unknown
22700	439.671	75.2326	5.84416	1.94179e-06	hypothetical protein	Hypothetical
22770	276.113	83.8824	3.29167	1.33227e-15	hypothetical protein	Hypothetical
22790	976.031	214.385	4.5527	3.85247e-12	unknown protein	Unknown
22800	97.1736	20.7009	4.69417	1.98787e-05	serine/threonine kinase	Regulatory functions
22840	348.78	240.142	1.45239	0.0123882	transposase	Other categories	Transposon-related functions
22850	253.057	380.99	-1.50555	0.0186597	5-aminolevulinate dehydratase	Biosynthesis of cofactors, prosthetic groups, and carriers	Cobalamin, heme, phycobilin and porphyrin
22860	2595.16	5371.42	-2.06978	0.0019962	GTP cyclohydrolase I	Biosynthesis of cofactors, prosthetic groups, and carriers	Folic acid
22870	286.307	1067.53	-3.72862	2.18557e-07	unknown protein	Unknown
22910	35.2011	59.315	-1.68503	0.000523322	protoheme IX farnesyltransferase	Photosynthesis and respiration	Respiratory terminal oxidases
22920	150.76	307.388	-2.03892	3.53231e-07	cytochrome c oxidase subunit XV assembly protein	Other categories	Other
22930	351.245	251.358	1.39739	0.0238806	cytochrome c oxidase subunit II	Photosynthesis and respiration	Respiratory terminal oxidases
22970	141.735	77.3406	1.83261	0.000644831	isovaleryl-CoA dehydrogenase	Other categories	Other
23050	12.5547	7.63949	1.6434	0.00634495	ribosomal large subunit pseudouridine synthase D	Other categories	Other
23100	326.415	215.202	1.51678	0.00279931	iron-sulfur cluster biosynthesis transcriptional regulator SufR	Other categories	Other
23110	331.257	222.133	1.49126	0.0069911	transposase	Other categories	Transposon-related functions
23140	21.2857	46.5274	-2.18585	2.36537e-07	probable glycosyl transferase	Other categories	Other
23150	15.8575	72.7515	-4.58783	0	phosphoribosylamine--glycine ligase	Purines, pyrimidines, nucleosides, and nucleotides	Purine ribonucleotide biosynthesis
23210	156.453	334.484	-2.13792	4.90039e-08	hypothetical protein	Hypothetical
23240	381.925	257.209	1.48488	0.00435715	putative adenylate cyclase family protein	Other categories	Other
23250	238.848	543.529	-2.27563	5.56159e-09	lactoylglutathione lyase	Other categories	Other
23290	31.677	90.005	-2.84134	1.31228e-13	anthranilate synthetase alpha-subunit	Amino acid biosynthesis	Aromatic amino acid family
23300	1601.35	16380.2	-10.229	0	photosystem I subunit II	Photosynthesis and respiration	Photosystem I
23330	130.944	249.316	-1.90399	4.15735e-06	anthranilate synthase component II	Amino acid biosynthesis	Aromatic amino acid family
23360	40.9898	12.0381	3.40501	1.14772e-08	hypothetical protein	Hypothetical
23370	23.6487	12.5328	1.88694	9.15483e-06	multidrug efflux transporter	Transport and binding proteins
23490	237.347	1018.16	-4.28975	0	photosystem II 11 kDa protein	Photosynthesis and respiration	Photosystem II
23530	22.3721	628.773	-28.1052	0	unknown protein	Unknown
23570	373.932	219.161	1.7062	0.00013656	3-beta hydroxysteroid dehydrogenase/isomerase (EC 1.1.1.145)	Other categories	Other
23580	98.564	42.8014	2.30282	3.81609e-08	hypothetical protein	Hypothetical
23600	631.45	1938.43	-3.06981	4.49343e-11	ribose-phosphate pyrophosphokinase	Purines, pyrimidines, nucleosides, and nucleotides	Purine ribonucleotide biosynthesis
23650	478.818	272.457	1.75741	5.99671e-05	leader peptidase I	Cellular processes	Protein and peptide secretion
23790	13.6634	21.0909	-1.54361	0.00646202	NADH dehydrogenase subunit 4	Photosynthesis and respiration	NADH dehydrogenase
23870	54.3953	97.5227	-1.79285	6.42589e-05	hypothetical protein	Hypothetical
23880	56.6019	133.569	-2.3598	7.88082e-10	protein conferring resistance to acetazolamide Zam	Other categories	Drug and analog sensitivity
23910	588.386	1974.63	-3.35601	0	hypothetical protein	Hypothetical
23920	282.77	1241.11	-4.38911	0	hypothetical protein	Hypothetical
23930	159.286	374.66	-2.35212	5.2269e-08	hypothetical protein	Hypothetical
23950	74.9823	29.3364	2.55595	2.89e-11	hypothetical protein	Hypothetical
23970	46.9749	28.4031	1.65387	0.00146905	hypothetical protein	Hypothetical
23980	339.155	86.1574	3.93646	0.0242783	unknown protein	Unknown
23990	47.8647	13.6099	3.5169	9.6708e-09	hypothetical protein	Hypothetical
24000	18.7962	4.91112	3.82727	4.82707e-07	auxin efflux carrier	Other categories	Other
24030	32.1633	18.2466	1.7627	0.000277875	putative O-antigen polymerase	Other categories	Other
24040	293.183	201.796	1.45287	0.00699789	hypothetical protein	Hypothetical
24050	183.48	69.3262	2.64662	8.2665e-12	hypothetical protein	Hypothetical
24060	1294.21	498.262	2.59745	7.1426e-11	hypothetical protein	Hypothetical
24070	62.8777	36.0963	1.74194	6.34334e-05	ABC-transporter ATP-binding protein	Transport and binding proteins
24150	130.747	189.518	-1.4495	0.00697307	MRP protein homolog	Other categories	Drug and analog sensitivity
24190	26.1938	17.3502	1.50971	0.00899501	glutamyl-tRNA(Gln) amidotransferase subunit A	Other categories	Other
24200	28.7011	17.6924	1.62223	0.00139502	hypothetical protein	Hypothetical
24260	139.358	193.991	-1.39203	0.0194578	photosystem II oxygen-evolving complex 23K protein PsbP	Photosynthesis and respiration	Photosystem II
24270	111.554	179.725	-1.6111	0.000577335	periplasmic protein	Other categories	Other
24280	4428.71	9921.48	-2.24026	7.54865e-09	hypothetical protein	Hypothetical
24300	334.322	635.449	-1.90071	0.00739634	unknown protein	Unknown
24310	110.225	185.02	-1.67857	0.0001628	tryptophanyl-tRNA synthetase	Translation	Aminoacyl tRNA synthetases and tRNA modification
24320	6.07308	3.12393	1.94405	0.0148241	glycosyl transferase family 39	Other categories	Other
24330	54.3605	23.9189	2.2727	4.24848e-06	hypothetical protein	Hypothetical
24360	40.1153	61.4737	-1.53243	0.0130778	hypothetical protein	Hypothetical
24410	245.391	103.896	2.36189	9.94254e-10	N-acetylglutamate kinase	Amino acid biosynthesis	Glutamate family / Nitrogen assimilation
24420	87.9005	51.7985	1.69697	0.000152469	N-acyl-L-amino acid amidohydrolase	Amino acid biosynthesis	Glutamate family / Nitrogen assimilation
24440	10767.1	337524	-31.3477	0	unknown protein	Unknown
24450	2028.76	69960.9	-34.4846	0	phycocyanin beta subunit	Photosynthesis and respiration	Phycobilisome
24460	1803.09	86730.6	-48.1011	0	phycocyanin alpha subunit	Photosynthesis and respiration	Phycobilisome
24480	81.037	2349.36	-28.9912	0	phycobilisome rod linker polypeptide	Photosynthesis and respiration	Phycobilisome
24500	77.4411	27.635	2.80228	9.21956e-11	hypothetical protein	Hypothetical
24510	51.8076	87.8848	-1.69637	0.000185022	D-alanine--D-alanine ligase	Other categories	Other
24520	76.1529	124.284	-1.63203	0.000416725	hypothetical protein	Hypothetical
24530	131.407	193.493	-1.47247	0.00580791	heat shock protein DnaJ-like	Cellular processes	Chaperones
24600	16.6013	10.4861	1.58317	0.00393168	peptidase, S9C (acylaminoacyl-peptidase) family protein	Other categories	Other
24610	82.8487	52.5688	1.57601	0.00115196	2-octaprenyl-6-methoxyphenol hydroxylase	Biosynthesis of cofactors, prosthetic groups, and carriers	Menaquinone and ubiquinone
24880	121.128	60.5786	1.99952	1.06802e-06	tocopherol O-methyltransferase	Fatty acid, phospholipid and sterol metabolism
24990	61.7594	124.843	-2.02144	3.21546e-07	GTP-binding protein	Other categories	Other
25010	63.2084	118.047	-1.86758	6.85002e-06	pleiotropic regulatory protein homolog	Other categories	Other
25020	120.403	632.879	-5.25634	0	hypothetical protein	Hypothetical
25030	488.043	2962.52	-6.0702	0	NAD(P)-dependent glyceraldehyde-3-phosphate dehydrogenase	Photosynthesis and respiration	CO2 fixation
25040	406.475	641.857	-1.57908	0.00635851	UDP-N-acetylmuramate-alanine ligase	Other categories	Other
25120	15977	32642.9	-2.04312	2.29281e-07	unknown protein	Unknown
25130	15.2455	45.6379	-2.99353	2.44693e-13	extracellular solute-binding protein	Transport and binding proteins
25140	13.289	42.2951	-3.18272	6.87539e-12	ABC-transporter permease protein	Transport and binding proteins
25160	40.8957	62.4765	-1.5277	0.00625221	putative c-type cytochrome biogenesis protein CcdA	Other categories	Other
25210	387.167	631.382	-1.63077	0.000921215	hypothetical protein	Hypothetical
25220	26.7159	14.621	1.82723	0.0157104	hypothetical protein	Hypothetical
25230	66.9555	14.8274	4.51566	0	hypothetical protein	Hypothetical
25240	40106.4	3294.81	12.1726	0	hypothetical protein	Hypothetical
25250	355.853	160.664	2.21489	1.15002e-07	unknown protein	Unknown
25260	11.918	4.6827	2.54511	6.72718e-09	WD-repeat protein Hat	Other categories	Other
25270	51.5693	81.3992	-1.57844	0.00175552	hypothetical protein	Hypothetical
25380	53.0014	110.583	-2.08642	0.00820264	undecaprenyl pyrophosphate synthetase	Other categories	Other
25410	27.9335	81.3886	-2.91366	1.44778e-11	hypothetical protein YCF53	Hypothetical
25420	80.5245	130.01	-1.61454	0.00063249	conserved hypothetical protein	Other categories	Other
25430	76.5756	138.814	-1.81277	0.000510993	photosystem II 13 kDa protein	Photosynthesis and respiration	Photosystem II
25450	130.739	665.639	-5.09136	0	hypothetical protein	Hypothetical
25460	2566.87	5128.53	-1.99797	7.8678e-07	hypothetical protein	Hypothetical
25470	26.6044	12.4881	2.13038	0.0164473	hypothetical protein	Hypothetical
25480	81.5186	46.3072	1.76039	0.00103038	hypothetical protein	Hypothetical
25520	24.3859	8.45763	2.8833	8.08832e-05	hypothetical protein	Hypothetical
25590	106.885	55.518	1.92523	1.04746e-05	hypothetical protein	Hypothetical
25600	34.9434	71.6976	-2.05182	1.74799e-07	alanyl-tRNA synthetase	Translation	Aminoacyl tRNA synthetases and tRNA modification
25670	12.3261	2.08625	5.90826	2.0675e-10	hypothetical protein	Hypothetical
25680	46.2651	13.6644	3.38581	6.66134e-16	replicative DNA helicase	Other categories	Other
25690	51.1063	31.9015	1.602	0.00299634	precorrin-4 C11-methyltransferase	Other categories	Other
25700	289.779	143.636	2.01745	8.24301e-07	hypothetical protein	Hypothetical
25710	303.937	149.769	2.02937	5.16766e-06	translation initiation factor	Translation	Protein modification and translation factors
25720	111.184	32.8184	3.38786	0	deoxyribodipyrimidine photolyase-related protein	Other categories	Other
25730	1631.62	533.337	3.05927	2.08556e-05	unknown protein	Unknown
25740	215.381	71.4377	3.01495	9.54792e-15	hypothetical protein	Hypothetical
25750	108.532	33.5027	3.2395	0.00906994	hypothetical protein	Hypothetical
25780	340.22	248.516	1.36901	0.0228481	hypothetical protein YCF51	Hypothetical
25790	78.8132	46.2316	1.70475	0.000684037	hypothetical protein	Hypothetical
25820	84.8476	146.471	-1.72628	0.00106263	transcription regulator ExsB homolog	Regulatory functions
25830	138.806	243.733	-1.75593	5.71587e-05	hypothetical protein	Hypothetical
25850	13.4049	38.9803	-2.90791	3.8269e-10	amino acid ABC-transporter permease protein	Transport and binding proteins
25950	491.701	129.264	3.80385	1.9984e-15	ATP-dependent Clp protease ATPase subunit	Translation	Degradation of proteins, peptides, and glycopeptides
25970	24.7926	39.8844	-1.60872	0.00107383	apolipoprotein N-acyltransferase	Cell envelope	Membranes, lipoproteins, and porins
25980	30.2749	19.4161	1.55927	0.0132898	putative GAF sensor protein	Other categories	Other
26010	22.6814	11.3252	2.00274	0.000177994	allergen V5/Tpx-1 related protein	Other categories	Other
26040	368.497	199.006	1.85169	1.03819e-05	hypothetical protein	Hypothetical
26110	71.3688	139.423	-1.95356	5.25435e-05	hypothetical protein	Hypothetical
26160	9.39297	28.0479	-2.98605	1.19082e-09	hypothetical protein	Hypothetical
26300	295.551	595.057	-2.01338	9.99841e-07	hypothetical protein	Hypothetical
26330	396.17	7990.47	-20.1693	0	hypothetical protein	Hypothetical
26400	1258.3	833.757	1.50919	0.0234982	periplasmic carboxyl-terminal protease	Translation	Degradation of proteins, peptides, and glycopeptides
26410	123.965	31.1591	3.97845	0	cell division protein FtsQ	Cellular processes	Cell division
26430	56.8705	79.3028	-1.39445	0.0232408	phosphomethylpyrimidine kinase	Other categories	Other
26540	81.3614	26.5668	3.06252	4.76767e-09	unknown protein	Unknown
26550	147.251	64.3269	2.2891	0.000558098	hypothetical protein	Hypothetical
26590	82.4152	31.3119	2.63207	8.77098e-12	hypothetical protein	Hypothetical
26620	40.5644	7.64635	5.30507	3.4861e-14	unknown protein	Unknown
26630	47.2907	10.041	4.70976	0.000307085	unknown protein	Unknown
26720	10.8433	3.00021	3.61418	5.51312e-09	tetratricopeptide protein	Other categories	Other
26730	187.367	21.7275	8.6235	0	hypothetical protein	Hypothetical
26760	386.957	202.65	1.90948	0.000210588	hypothetical protein	Hypothetical
26770	153.42	46.4759	3.30107	1.77636e-15	hypothetical protein	Hypothetical
26790	140968	5978.6	23.5788	0	hypothetical protein	Hypothetical
26800	4216.73	559.729	7.53352	0	AAA famiry ATPase central region	Other categories	Other
26810	18610.1	2994.27	6.21524	0	hypothetical protein	Hypothetical
26840	67.7555	24.6249	2.7515	6.2739e-10	amino-acid ABC-transporter ATP-binding protein	Transport and binding proteins
26850	88.63	17.7867	4.98294	0	amino-acid ABC-transporter permease protein	Transport and binding proteins
26880	24.7933	7.10258	3.49075	0.00492925	hypothetical protein	Hypothetical
26890	333.113	195.801	1.70128	0.000889101	resolvase-like protein	Other categories	Other
26940	130.274	48.7545	2.67204	0.000716091	PemK-like protein	Other categories	Other
26960	384.917	186.668	2.06204	0.000595832	hypothetical protein	Hypothetical
27020	131.875	90.822	1.45202	0.00744312	transposase	Other categories	Transposon-related functions
27090	341.56	234.622	1.45579	0.0129534	hypothetical protein	Hypothetical
27260	20.0937	39.1616	-1.94895	0.000194313	uracil phosphoribosyltransferase	Purines, pyrimidines, nucleosides, and nucleotides	Interconversions and salvage of nucleosides and nucleotides
27270	3658.71	10723.2	-2.93087	5.9508e-14	30S ribosomal protein S21	Translation	Ribosomal proteins: synthesis and modification
27290	52.1358	160.546	-3.07938	6.66134e-16	NADH dehydrogenase subunit 5 NdhF4	Photosynthesis and respiration	NADH dehydrogenase
27310	194.956	39.8879	4.8876	0	hypothetical protein	Hypothetical
27460	311.289	159.324	1.95381	4.46465e-05	cyanophycin synthetase	Other categories	Other
27490	68.3865	36.8265	1.85699	0.0176379	transposase	Other categories	Transposon-related functions
27510	111.189	249.472	-2.24368	4.76147e-09	putative sugar kinase	Other categories	Other
27530	98.9574	53.7116	1.84238	4.01598e-05	short-chain dehydrogenase/reductase	Other categories	Other
27570	331.26	102.227	3.24044	6.20724e-10	hypothetical protein	Hypothetical
27930	37.6827	26.2671	1.4346	0.0243697	ABC-transporter ATP-binding protein	Transport and binding proteins
27960	279.717	569.586	-2.03629	2.79907e-07	hypothetical protein	Hypothetical
27970	20.5118	36.086	-1.75928	0.000772555	phycocyanin alpha-subunit phycocyanobilin lyase	Photosynthesis and respiration	Phycobilisome
27980	30.4738	71.7975	-2.35604	9.84981e-10	pyruvate kinase	Energy metabolism	Glycolysis
27990	457.666	956.598	-2.09017	3.47943e-05	porin type major outer membrane protein	Cell envelope	Membranes, lipoproteins, and porins
28050	205.082	1285.18	-6.26666	0	glucose-1-phosphate adenylyltransferase	Other categories	Other
28060	33.0054	17.8016	1.85407	6.25725e-05	hypothetical protein	Hypothetical
28080	25.0466	37.4919	-1.49689	0.0152836	hypothetical protein	Hypothetical
28090	216.928	418.248	-1.92805	6.81086e-06	similar to chlorobenzene dioxygenase ferredoxin component	Other categories	Other
28100	206.583	350.961	-1.69889	0.000117758	hypothetical protein	Hypothetical
28170	116.259	226.752	-1.9504	1.24332e-06	histidinol-phosphate aminotransferase	Other categories	Other
28180	82.2369	318.418	-3.87196	0	GcpE protein homolog	Other categories	Other
28190	41.8192	83.6337	-1.99989	2.10842e-06	alpha/beta fold family hydrolase	Other categories	Other
28240	45.5817	32.9695	1.38254	0.021727	hypothetical protein	Hypothetical
28300	40.1508	25.7358	1.56011	0.00183546	DNA repair protein RecN	DNA replication, restriction, modification, recombination, and repair
28310	25.5902	11.4495	2.23505	0.000517795	hypothetical protein	Hypothetical
28320	43.9533	24.2952	1.80914	0.000882309	hypothetical protein	Hypothetical
28340	451.041	196.099	2.30007	4.03868e-07	hypothetical protein	Hypothetical
28370	33.7522	20.7355	1.62775	0.00262743	hypothetical protein	Hypothetical
28380	251.859	111.519	2.25844	2.6994e-08	orotate phosphoribosyltransferase	Other categories	Other
28390	8310.99	765.247	10.8605	0	hypothetical protein	Hypothetical
28400	215.089	142.945	1.5047	0.00322509	probable tRNA/rRNA methyltransferase	Other categories	Other
28430	90.6978	243.111	-2.68045	1.2661e-12	carbamoyl-phosphate synthase small chain	Energy metabolism	Amino acids and amines
28460	42.6984	18.0362	2.36737	1.23695e-06	pentapeptide repeat family protein	Other categories	Other
28470	26.5918	14.0582	1.89155	0.00950384	hypothetical protein	Hypothetical
28480	38.0702	18.5219	2.05542	0.000244818	hypothetical protein	Hypothetical
28490	30.4095	13.0247	2.33476	0.00410547	hypothetical protein	Hypothetical
28500	14.1725	5.85283	2.42148	3.60675e-06	serine/threonine protein kinase	Regulatory functions
28510	53.941	33.9018	1.5911	0.00293252	rhodanese-like domain-containing protein	Other categories	Other
28520	37.5451	25.0717	1.49751	0.016322	DNA repair protein RecO	DNA replication, restriction, modification, recombination, and repair
28540	91.4282	37.4892	2.43879	1.38968e-05	hypothetical protein	Hypothetical
28560	68.5138	32.0811	2.13564	3.72541e-07	hypothetical protein	Hypothetical
28580	55.6153	99.6507	-1.79179	4.26282e-05	hypothetical protein	Hypothetical
28660	293.522	664.392	-2.26352	3.2246e-08	hypothetical protein	Hypothetical
28670	55.1591	204.738	-3.71177	0	dihydroxyacid dehydratase	Amino acid biosynthesis	Branched chain family
28700	1442.1	931.051	1.54889	0.00196036	hypothetical protein	Hypothetical
28770	22.5016	13.6318	1.65067	0.00279841	cytosine-specific methyltransferase	Other categories	Other
28890	1693.82	3203.16	-1.89109	4.01531e-06	unknown protein	Unknown
28940	51.903	162.595	-3.13267	1.55431e-15	photosystem I biogenesis protein BtpA	Photosynthesis and respiration	Photosystem I
29020	591.31	296.851	1.99194	6.31797e-05	probable glycosyl transferase	Other categories	Other
29040	21.0532	31.4545	-1.49405	0.00366136	adenine specific DNA methyltransferase	Other categories	Other
29110	152.515	87.8596	1.73589	0.000710654	ferredoxin-dependent glutamate synthase	Amino acid biosynthesis	Glutamate family / Nitrogen assimilation
29120	71.0747	45.7066	1.55502	0.00255666	succinyl-CoA synthetase alpha chain	Energy metabolism	TCA cycle
29130	204.155	818.553	-4.00947	2.98397e-07	hypothetical protein	Hypothetical
29180	94.4635	14.3548	6.58062	1.88738e-14	CsbD-like protein	Other categories	Other
29190	1735.75	254.075	6.83164	5.21805e-14	CsbD-like protein	Other categories	Other
29200	67.5836	0.5	135.167	7.99543e-05	unknown protein	Unknown
29450	10.6848	4.02123	2.6571	0.0164223	similar to sterol C5-desaturase	Fatty acid, phospholipid and sterol metabolism
29460	20.076	7.0149	2.86191	5.85803e-11	hypothetical protein	Hypothetical
29470	304.098	99.4697	3.05719	2.4869e-13	hypothetical protein	Hypothetical
29480	9294.41	2647.99	3.50999	0	unknown protein	Unknown
29510	637.439	982.955	-1.54204	0.0017749	hypothetical protein	Hypothetical
29520	678.717	1577.45	-2.32416	1.33449e-05	unknown protein	Unknown
29540	35.6916	67.1915	-1.88256	0.016064	hypothetical protein	Hypothetical
29890	161.392	107.125	1.50658	0.00351897	hypothetical protein	Hypothetical
29900	144.453	244.545	-1.6929	0.000160083	GDP-fucose synthetase	Cell envelope	Surface polysaccharides, lipopolysaccharides and antigens
30000	348.392	203.407	1.71278	0.000735747	resolvase-like protein	Other categories	Other
30010	73.8291	190.414	-2.57912	7.02083e-12	transfer RNA-Gln reductase	Translation	Aminoacyl tRNA synthetases and tRNA modification
30020	535.134	7238.77	-13.527	0	fructose-1,6-/sedoheptulose-1,7-bisphosphatase	Other categories	Other
30030	39.4296	18.0385	2.18586	0.000602915	hypothetical protein	Hypothetical
30040	364.351	240.333	1.51603	0.00261159	hypothetical protein	Hypothetical
30050	31.206	48.3298	-1.54873	0.0132845	ferripyochelin binding protein	Other categories	Other
30060	3009.99	11175.8	-3.7129	1.59378e-07	photosystem II protein PsbY	Photosynthesis and respiration	Photosystem II
30090	122.484	290.272	-2.36988	8.46721e-10	adenylosuccinate lyase	Purines, pyrimidines, nucleosides, and nucleotides	Purine ribonucleotide biosynthesis
30190	12.5309	8.56793	1.46254	0.0187178	hypothetical protein	Hypothetical
30200	70.585	38.5259	1.83214	2.60228e-05	probable potassium channel protein	Transport and binding proteins
30210	5592.61	802.65	6.96768	0	unknown protein	Unknown
30230	349.704	80.3008	4.35493	5.01177e-12	peptidase	Other categories	Other
30240	119.874	55.5002	2.15988	0.000201543	cobalamin [5'-phosphate] synthase	Biosynthesis of cofactors, prosthetic groups, and carriers	Cobalamin, heme, phycobilin and porphyrin
30290	956.208	386.995	2.47085	7.09383e-08	hypothetical protein	Hypothetical
30470	34.4434	24.311	1.41678	0.0235674	aspartate aminotransferase	Other categories	Other
30490	9.03463	23.9235	-2.64798	0.00276896	unknown protein	Unknown
30500	15.3525	32.3925	-2.10992	1.93297e-06	hypothetical protein	Hypothetical
30510	115.707	292.099	-2.52447	9.25449e-11	serine protease HtrA	Translation	Degradation of proteins, peptides, and glycopeptides
30540	237.849	542.493	-2.28083	0.000387496	ribosome releasing factor	Translation	Protein modification and translation factors
30550	202.843	612.154	-3.01787	5.65464e-09	uridine monophosphate kinase	Purines, pyrimidines, nucleosides, and nucleotides	Pyrimidine ribonucleotide biosynthesis
30560	195.592	565.767	-2.89259	2.66454e-14	hypothetical protein	Hypothetical
30600	34.7891	14.4611	2.4057	1.79851e-09	serine/threonine protein kinase	Regulatory functions
30650	94.9085	50.1018	1.89431	0.000340532	hypothetical protein	Hypothetical
30660	67.0434	33.1799	2.0206	0.00218204	hypothetical protein	Hypothetical
30700	43.4384	24.6528	1.76201	4.48194e-05	hypothetical protein	Hypothetical
30710	65.5314	41.5815	1.57597	0.00176847	hypothetical protein	Hypothetical
30720	56.4918	38.5038	1.46717	0.0167158	hypothetical protein	Hypothetical
30840	27.7471	16.7573	1.65582	0.00512697	CRISPR-associated TM1814 family protein	Other categories	Other
30850	41.8957	23.3507	1.79419	0.00176645	CRISPR-associated protein Cas4	Other categories	Other
30860	55.69	29.8985	1.86264	3.70136e-05	CRISPR-associated protein Cas1	Other categories	Other
30870	142.025	258.564	-1.82055	0.000725085	CRISPR-associated protein Cas2	Other categories	Other
30880	300.466	671.836	-2.23598	4.11699e-05	unknown protein	Unknown
31160	83.1082	51.448	1.61538	0.000597634	probable ABC-transporter permease protein	Other categories	Other
31170	210.787	124.58	1.69198	0.00027954	ABC-transporter membrane fusion protein	Transport and binding proteins
31210	832.603	301.812	2.75868	6.97726e-10	virulence-associated protein VapB-like protein	Other categories	Other
31220	195.859	58.1106	3.37045	1.39444e-13	virulence-associated protein VapC-like protein	Regulatory functions
31240	22.6169	7.39105	3.06004	8.85769e-09	glycosyl transferase family 2	Other categories	Other
31260	23.9108	11.8853	2.0118	5.14733e-05	hypothetical protein	Hypothetical
31270	84.656	31.9412	2.65037	1.21703e-11	S-layer region-like precursor	Other categories	Other
31280	35.8556	22.887	1.56664	0.00143541	copper-transporting P-type ATPase PacS	Transport and binding proteins
31290	61.8691	402.08	-6.49888	0	uroporphyrinogen decarboxylase	Biosynthesis of cofactors, prosthetic groups, and carriers	Cobalamin, heme, phycobilin and porphyrin
31300	16.8811	58.8374	-3.4854	8.21565e-15	NAD-dependent epimerase/dehydratase	Other categories	Other
31310	34.8637	69.1022	-1.98207	1.05767e-06	ABC-transporter ATP-binding protein	Transport and binding proteins
31330	38.6301	119.396	-3.09075	2.81597e-12	adenylylsulfate kinase	Amino acid biosynthesis	Serine family / Sulfur assimilation
31350	71.9775	113.357	-1.57489	0.00114837	lytic transglycosylase catalytic precursor	Cell envelope	Murein sacculus and peptidoglycan
31360	28.1354	42.5476	-1.51224	0.00947392	hypothetical protein	Hypothetical
31370	7.7658	19.1027	-2.45985	0.000223797	dephospho-CoA kinase	Other categories	Other
31380	51.1678	123.751	-2.41853	3.07621e-09	phosphoribosyl aminoidazole succinocarboxamide synthetase	Purines, pyrimidines, nucleosides, and nucleotides	Purine ribonucleotide biosynthesis
31400	349.382	140.191	2.49219	5.61088e-08	hypothetical protein	Hypothetical
31430	96.4891	135.425	-1.40353	0.0157948	threonyl-tRNA synthetase	Translation	Aminoacyl tRNA synthetases and tRNA modification
31480	37.8516	74.9205	-1.97932	7.02799e-07	aminopeptidase	Translation	Degradation of proteins, peptides, and glycopeptides
31510	4.71986	8.22088	-1.74176	0.0180504	sulfate transport system ATP-binding protein	Transport and binding proteins
31520	3.45294	12.0739	-3.4967	3.1059e-06	sulfate transport system permease protein	Transport and binding proteins
31530	11.7553	27.0987	-2.30523	7.36722e-06	sulfate transport system permease protein	Transport and binding proteins
31540	32.0226	70.0463	-2.1874	0.000378222	hypothetical protein	Hypothetical
31550	7.53067	25.9775	-3.44956	4.96971e-11	sulfate transport system substrate-binding protein	Transport and binding proteins
31560	69.205	205.913	-2.97541	2.06501e-14	hypothetical protein	Hypothetical
31570	39.7966	69.5999	-1.74889	0.000356814	ribonuclease III	Transcription	Degradation of RNA
31590	252.968	451.177	-1.78353	0.00207661	threonyl-tRNA synthetase	Translation	Aminoacyl tRNA synthetases and tRNA modification
31670	19.0163	28.0556	-1.47534	0.0182961	probable methyltransferase	Fatty acid, phospholipid and sterol metabolism
31680	80.7684	225.287	-2.7893	3.94661e-06	hypothetical protein	Hypothetical
31690	34.878	87.8432	-2.51858	2.29956e-11	ferrous iron transport protein B	Other categories	Other
31700	47.5751	125.651	-2.64111	1.35932e-10	ferrous iron transport protein A	Other categories	Other
31720	36.6021	16.3273	2.24177	1.6216e-08	two-component hybrid sensor and regulator	Regulatory functions
31800	4556.07	27025.1	-5.93167	0	photosystem I reaction center subunit IV	Photosynthesis and respiration	Photosystem I
31840	13.688	7.73181	1.77035	0.00162954	unknown protein	Unknown
31860	162.293	80.8387	2.00762	0.00544966	hypothetical protein	Hypothetical
31880	738.052	395.965	1.86393	1.09589e-05	Mo-dependent nitrogenase-like	Other categories	Other
31930	121.287	54.3506	2.23157	7.85569e-07	2-C-methyl-D-erythritol 2,4-cyclodiphosphate synthase	Other categories	Other
31960	113.302	163.031	-1.43891	0.0153545	preprotein translocase SecA subunit	Cellular processes	Protein and peptide secretion
32000	2079.77	5957.14	-2.86433	3.21965e-14	50S ribosomal protein L28	Translation	Ribosomal proteins: synthesis and modification
32010	1925.43	6879.87	-3.57316	0	photosystem I reaction center subunit X	Photosynthesis and respiration	Photosystem I
32020	42.6924	16.6676	2.5614	3.79633e-09	amino-acid ABC-transporter permease protein	Transport and binding proteins
32030	564.776	174.625	3.23422	3.33067e-14	unknown protein	Unknown
32060	862.529	369.598	2.33369	2.65953e-06	unknown protein	Unknown
32120	70.8072	139.666	-1.97248	9.93013e-07	phenylalanyl-tRNA synthetase alpha chain	Translation	Aminoacyl tRNA synthetases and tRNA modification
32160	10102.4	17895.7	-1.77143	0.00691488	unknown protein	Unknown
32170	1128.19	1952.99	-1.73108	0.00444988	RNA binding protein	Translation	Nucleoproteins
32180	2139.6	5586.45	-2.61098	8.60372e-11	hypothetical protein	Hypothetical
32200	123.358	53.6069	2.30116	5.23922e-07	hypothetical protein	Hypothetical
32210	2183.31	9969.96	-4.56644	0	photosystem II reaction center protein Z	Photosynthesis and respiration	Photosystem II
32220	186.357	375.305	-2.0139	4.40239e-07	riboflavin synthase beta subunit	Biosynthesis of cofactors, prosthetic groups, and carriers	Riboflavin
32240	20.7723	40.3955	-1.94468	0.0167592	unknown protein	Unknown
32260	81.791	51.7827	1.5795	0.00104769	gamma-glutamyl phosphate reductase	Other categories	Other
32280	43.1255	21.16	2.03807	2.42074e-05	hypothetical protein	Hypothetical
32310	360.601	1144.26	-3.1732	2.58657e-10	NADH dehydrogenase subunit 5	Photosynthesis and respiration	NADH dehydrogenase
32320	298.018	54.8678	5.43156	0.0243332	unknown protein	Unknown
32340	22.4702	36.1879	-1.61048	0.00594433	similar to Zn-dependent protease precursor	Other categories	Other
32350	329.775	1221.71	-3.70468	3.73035e-14	preprotein translocase SecG subunit	Cellular processes	Protein and peptide secretion
32370	616.297	212.096	2.90575	9.28726e-11	2,3-bisphosphoglycerate-independent phosphoglycerate mutase	Energy metabolism	Glycolysis
32380	90.4423	61.5749	1.46882	0.00633202	phosphate-binding protein PstS homolog	Transport and binding proteins
32430	1797.41	5277.02	-2.9359	2.49315e-09	30S ribosomal protein S4	Translation	Ribosomal proteins: synthesis and modification
32440	259.483	129.975	1.99641	1.16318e-06	hypothetical protein	Hypothetical
32470	3404.05	5673.76	-1.66677	0.0227137	fructose-bisphosphate aldolase class II	Energy metabolism	Glycolysis
32490	174.504	288.554	-1.65357	0.00050666	periplasmic binding protein	Other categories	Other
32610	15.0041	5.93455	2.52826	9.57503e-09	DNA methylase	Other categories	Other
32630	94.7934	48.8973	1.93862	9.79783e-05	hypothetical protein	Hypothetical
32640	763.292	1170.29	-1.53321	0.00342047	hypothetical protein	Hypothetical
32650	1330.9	3446.4	-2.58953	1.49804e-07	unknown protein	Unknown
32660	282.653	794.674	-2.81148	2.93012e-11	molybdopterin biosynthesis protein MoeB	Biosynthesis of cofactors, prosthetic groups, and carriers	Molybdopterin
32670	420.201	1030.17	-2.45161	8.94826e-11	glycine decarboxylase complex H-protein	Energy metabolism	Amino acids and amines
32690	64.306	40.0461	1.6058	0.000699878	acetyl-CoA synthetase	Other categories	Other
32790	540.698	331.561	1.63076	0.000453761	hypothetical protein	Hypothetical
32800	1342.52	836.553	1.60482	0.000780736	hypothetical protein	Hypothetical
32940	152.584	83.3388	1.83089	5.03171e-05	protein-tyrosine kinase	Other categories	Other
32960	513.934	276.457	1.859	4.01154e-05	quinolinate synthetase	Biosynthesis of cofactors, prosthetic groups, and carriers	Quinolinate
32980	136.203	317.776	-2.33311	1.56331e-07	hypothetical protein	Hypothetical
32990	1757.79	6487.87	-3.69092	1.11116e-08	photosystem II core light harvesting protein PsbB	Photosynthesis and respiration	Photosystem II
33000	49490.4	126666	-2.55941	3.99445e-11	photosystem II reaction center protein J	Photosynthesis and respiration	Photosystem II
33010	13432.1	38419.4	-2.86027	1.21876e-07	photosystem II reaction center protein L	Photosynthesis and respiration	Photosystem II
33020	33818.9	93702.1	-2.7707	2.07528e-06	photosystem II cytochrome b559 beta subunit	Photosynthesis and respiration	Photosystem II
33030	5294.38	16111.4	-3.04311	6.6458e-13	photosystem II cytochrome b559 alpha subunit	Photosynthesis and respiration	Photosystem II
33040	968.616	2276.54	-2.3503	6.97296e-09	hypothetical protein	Hypothetical
33050	2319.77	5817.17	-2.50765	0.00418221	hypothetical protein	Hypothetical
33060	854.915	1615.28	-1.8894	3.5292e-05	hypothetical protein	Hypothetical
33070	369.668	1012.66	-2.73938	5.08038e-13	membrane-associated rubredoxin	Fatty acid, phospholipid and sterol metabolism
33240	62.6683	24.0394	2.6069	0.0148383	hypothetical protein	Hypothetical
33290	786.218	534.705	1.47038	0.0197568	hypothetical protein	Hypothetical
33320	1797.58	1054.53	1.70463	0.00525407	hypothetical protein	Hypothetical
33380	9.2872	3.54419	2.6204	0.00338504	hypothetical protein	Hypothetical
33410	25.6936	17.5973	1.46009	0.0158839	hypothetical protein	Hypothetical
33550	137.257	189.218	-1.37857	0.0199766	squalene/phytoene synthase	Other categories	Other
33570	2242.09	3431.73	-1.53059	0.0209271	cytochrome b6	Photosynthesis and respiration	Cytochrome b6/f complex
33590	315.415	103.87	3.03663	1.69642e-13	hypothetical protein	Hypothetical
33600	223.606	48.5384	4.60679	0	hypothetical protein	Hypothetical
33610	70.1727	17.3351	4.04801	7.07465e-06	hypothetical protein	Hypothetical
33630	39.2297	15.5962	2.51534	7.07001e-07	hypothetical protein	Hypothetical
33720	93.9631	597.778	-6.36184	0	hypothetical protein	Hypothetical
33870	125.959	172.481	-1.36934	0.021995	putative peptidase	Other categories	Other
33900	61.089	85.9756	-1.40738	0.018909	3-oxoacyl-[acyl-carrier protein] reductase	Fatty acid, phospholipid and sterol metabolism
33940	103.247	42.9813	2.40214	0.00067462	hypothetical protein	Hypothetical
33970	69.4892	127.9	-1.84057	5.0643e-05	excinuclease ABC subunit A	DNA replication, restriction, modification, recombination, and repair
33980	215.126	316.353	-1.47055	0.00525414	serine acetyltransferase	Other categories	Other
34020	342.975	162.165	2.11498	0.000456713	hypothetical protein	Hypothetical
34030	142.613	31.5977	4.5134	0	hypothetical protein	Hypothetical
34170	77.1275	41.6663	1.85108	0.00866757	hypothetical protein	Hypothetical
34250	202.447	322.273	-1.59189	0.0022718	hypothetical protein	Hypothetical
34460	103.729	513.12	-4.94674	0	ferrochelatase	Other categories	Other
34620	82.4404	360.891	-4.3776	0	omega 3 acyl-lipid desaturase	Fatty acid, phospholipid and sterol metabolism
34630	33.5469	18.9255	1.77258	0.000417429	DNA cytosine methylase	Other categories	Other
34730	275.217	516.115	-1.8753	5.70272e-06	transposase	Other categories	Transposon-related functions
34750	7.17476	3.93728	1.82226	0.0139648	hypothetical protein	Hypothetical
34800	369.271	234.692	1.57343	0.00523974	hypothetical protein	Hypothetical
34810	22.8925	11.7422	1.94959	0.0179113	hypothetical protein	Hypothetical
34870	21.0585	31.4598	-1.49392	0.0049053	putative phosphoketolase	Other categories	Other
34890	191.271	535.525	-2.79982	1.32427e-12	glyceraldehyde 3-phosphate dehydrogenase	Photosynthesis and respiration	CO2 fixation
34920	71.3699	39.3617	1.81318	1.9863e-05	glutamine-dependent NAD(+) synthetase	Other categories	Other
34940	299.414	166.325	1.80017	0.000661259	probable nicotinate-nucleotide adenylyltransferase	Other categories	Other
34970	188.046	73.7703	2.54907	2.87416e-09	hypothetical protein	Hypothetical
35000	122.813	10.6234	11.5606	0	hypothetical protein	Hypothetical
35010	794.908	89.5702	8.87469	0	hypothetical protein	Hypothetical
35020	1042.94	144.795	7.20287	0	pentapeptide repeat family protein	Other categories	Other
35030	234.68	62.17	3.77481	2.41007e-12	hypothetical protein	Hypothetical
35040	918.256	175.16	5.24238	4.94035e-08	unknown protein	Unknown
35050	474.272	55.5205	8.54229	0	hypothetical protein	Hypothetical
35060	95.9861	44.2651	2.16844	1.04432e-07	hypothetical protein	Hypothetical
35080	240.765	334.908	-1.39102	0.0182505	hypothetical protein	Hypothetical
35090	122.941	233.562	-1.89979	7.08018e-06	enolase	Energy metabolism	Glycolysis
35130	2846.73	4506.62	-1.58309	0.00561488	transcriptional regulator AbrB	Regulatory functions
35170	11.1211	4.57736	2.42959	0.000834667	cobalamin biosynthesis protein CobD	Biosynthesis of cofactors, prosthetic groups, and carriers	Cobalamin, heme, phycobilin and porphyrin
35180	664.653	344.584	1.92886	0.0131812	unknown protein	Unknown
35470	437.116	182.645	2.39325	0.00263256	unknown protein	Unknown
35480	13.5263	5.94853	2.27389	0.00220857	hypothetical protein	Hypothetical
35510	41.6659	168.36	-4.04071	0	phenylalanyl-tRNA synthetase	Translation	Aminoacyl tRNA synthetases and tRNA modification
35540	51.4782	31.2856	1.64543	0.00366035	hypothetical protein	Hypothetical
35580	114.516	57.3618	1.99638	0.00195084	hypothetical protein	Hypothetical
35590	41.0565	76.2745	-1.85779	0.00921703	hypothetical protein	Hypothetical
35610	31.7152	10.6511	2.97765	0.000530891	hypothetical protein	Hypothetical
35640	109.934	65.4444	1.67981	0.000605079	hypothetical protein	Hypothetical
35660	21.4218	11.7903	1.8169	0.000163513	hypothetical protein	Hypothetical
35670	255.012	170.03	1.49981	0.00446753	hypothetical protein	Hypothetical
35680	80.3019	52.9929	1.51533	0.00279099	probable RNA methyltransferase	Translation	Ribosomal proteins: synthesis and modification
35700	1049.41	584.502	1.79539	0.000695909	hypothetical protein	Hypothetical
35710	162.718	78.5016	2.0728	7.91732e-06	hypothetical protein	Hypothetical
36000	4233.3	7725.71	-1.82499	3.88731e-05	unknown protein	Unknown
36010	1233.78	5589.19	-4.53014	0	alternative photosystem I reaction center subunit X	Photosynthesis and respiration	Photosystem I
36020	14.7249	43.1695	-2.93173	9.28955e-09	N-(5'-phosphoribosyl)anthranilate isomerase (EC 5.3.1.24)	Amino acid biosynthesis	Aromatic amino acid family
36030	370.811	708.341	-1.91025	7.36723e-06	GTP cyclohydrolase I	Biosynthesis of cofactors, prosthetic groups, and carriers	Folic acid
36040	265.635	591.603	-2.22713	1.51157e-08	short-chain dehydrogenase/reductase	Other categories	Other
36050	13.6081	28.5471	-2.0978	2.42339e-05	hypothetical protein	Hypothetical
36090	142.178	286.715	-2.01659	6.33367e-06	hypothetical protein	Hypothetical
36100	54.5017	1063.2	-19.5076	1.6076e-13	hypothetical protein	Hypothetical
36110	12.7906	23.9946	-1.87596	0.000213416	probable glycosyl transferase	Other categories	Other
36120	32.873	13.9823	2.35104	1.80727e-07	PxcA protein	Biosynthesis of cofactors, prosthetic groups, and carriers	Cobalamin, heme, phycobilin and porphyrin
36130	69.8655	49.2609	1.41827	0.0148697	RND multidrug efflux transporter	Other categories	Other
36160	52.9036	37.7395	1.40181	0.0169932	eukaryotic Na+/H+ exchanger	Other categories	Other
36170	67.9796	37.5089	1.81236	0.000121221	ABC-transporter ATP-binding protein	Transport and binding proteins
36180	32.8788	14.3943	2.28415	0.00224652	hypothetical protein	Hypothetical
36230	31.7657	13.2075	2.40513	3.57874e-07	sugar transferase	Other categories	Other
36300	312.21	630.37	-2.01906	1.95626e-06	extracellular solute-binding protein	Transport and binding proteins
36310	480.58	1191.5	-2.4793	1.25454e-08	unknown protein	Unknown
36330	22.4234	11.0858	2.02271	0.000540099	hypothetical protein	Hypothetical
36340	24.8598	164.523	-6.61803	0.00021363	unknown protein	Unknown
36410	84.436	116.017	-1.37402	0.02278	NADH:flavin oxidoreductase	Other categories	Other
36460	7.24698	2.68569	2.69837	0.0021828	UDP-glucose:tetrahydrobiopterin glucosyltransferase (EC 2.4.1.-)	Energy metabolism	Sugars
36470	44.3669	25.3982	1.74685	0.000230123	hypothetical protein	Hypothetical
36490	5558.92	16175.1	-2.90976	3.82538e-08	photosystem II 12 kDa extrinsic protein	Photosynthesis and respiration	Photosystem II
36510	125.736	1077.76	-8.57161	0	peroxiredoxin	Other categories	Other
36530	8430.34	28128.2	-3.33654	1.03939e-10	ferredoxin I	Photosynthesis and respiration	Soluble electron carriers
36540	35.2319	20.5666	1.71306	0.000610558	putative alpha-mannosidase	Central intermediary metabolism	Polysaccharides and glycoproteins
36580	182.768	288.536	-1.5787	0.000994675	beta-type carbonic anhydrase	Other categories	Other
36590	1352.84	4886.48	-3.61202	0	50S ribosomal protein L19	Translation	Ribosomal proteins: synthesis and modification
36600	470.076	1461.31	-3.10867	0.0073123	preprotein translocase SecE subunit	Cellular processes	Protein and peptide secretion
36610	352.206	1098.92	-3.12011	2.31815e-13	transcription antitermination protein NusG	Regulatory functions
36620	295.097	1335.06	-4.52414	0	50S ribosomal protein L11	Translation	Ribosomal proteins: synthesis and modification
36630	65.9046	742.138	-11.2608	0	50S ribosomal protein L1	Translation	Ribosomal proteins: synthesis and modification
36680	49.5948	89.3915	-1.80244	5.03799e-05	riboflavin biosynthesis protein RibF	Biosynthesis of cofactors, prosthetic groups, and carriers	Riboflavin
36690	1001.14	3195.51	-3.19187	3.3884e-13	hypothetical protein	Hypothetical
36700	134.973	33.0951	4.07834	0	hypothetical protein	Hypothetical
36750	48.8454	13.3573	3.65683	0	pyruvate decarboxylase isozyme 1	Other categories	Other
36780	55.9091	32.8149	1.70377	0.000165989	hypothetical protein	Hypothetical
36790	40.472	22.7774	1.77685	0.00562135	hypothetical protein	Hypothetical
36800	31.5369	13.7871	2.28742	0.000198738	hypothetical protein	Hypothetical
36860	29.1769	18.334	1.59141	0.00335337	similar to flotillin	Other categories	Other
36870	123.137	47.7527	2.57864	6.27661e-07	mannose-6-phosphate isomerase	Energy metabolism	Sugars
36880	165.972	94.5939	1.75457	0.000106484	bifunctional cobalamin biosynthesis protein CobP	Biosynthesis of cofactors, prosthetic groups, and carriers	Cobalamin, heme, phycobilin and porphyrin
36930	28.2668	11.4865	2.46087	2.29652e-09	hypothetical protein	Hypothetical
36940	13.4661	9.27297	1.45219	0.0186658	hypothetical protein	Hypothetical
37010	3073.2	4308.14	-1.40184	0.0140085	probable DNA-directed RNA polymerase omega subunit	Other categories	Other
37030	56.2548	34.7956	1.61672	0.00398025	hypothetical protein	Hypothetical
37070	576.477	355.776	1.62034	0.000505656	Fe-S metabolism associated SufE	Other categories	Other
37090	22.0646	12.3235	1.79045	0.000577734	heat shock protein 40	Cellular processes	Chaperones
37140	38.0539	62.9839	-1.65512	0.0166979	hypothetical protein	Hypothetical
37190	237.248	349.827	-1.47452	0.0077463	putative arsenical pump-driving ATPase	Other categories	Drug and analog sensitivity
37200	94.9353	55.5534	1.7089	0.00215604	aspartate 1-decarboxylase	Biosynthesis of cofactors, prosthetic groups, and carriers	Pantothenate
37250	16.5675	8.3637	1.98088	0.00384367	hypothetical protein	Hypothetical
37270	71.5853	154.668	-2.16061	3.06785e-08	aspartyl-tRNA synthetase	Other categories	Other
37320	1319.12	527.512	2.50064	1.10723e-08	putative HlyD family secretion protein	Other categories	Other
37340	78.8444	26.2172	3.00735	2.02061e-14	RND multidrug efflux transporter	Other categories	Other
37410	86.8286	33.5701	2.58649	0.0090119	hypothetical protein	Hypothetical
37500	15.4267	7.40537	2.08318	4.0133e-05	hypothetical protein	Hypothetical
37510	150.12	61.2308	2.45171	0.000355684	hypothetical protein	Hypothetical
37520	87.6056	57.7773	1.51626	0.0132164	peptidase M42	Other categories	Other
37580	51340.6	108228	-2.10804	0.000195346	gas vesicle protein GvpAI	Other categories	Other
37590	893558	2018310	-2.25873	0.00629078	gas vesicle protein GvpAII	Other categories	Other
37600	87978	199166	-2.26382	0.000248177	gas vesicle protein GvpAIII	Other categories	Other
37610	221217	497852	-2.25051	0.000181736	unknown protein	Unknown
37760	47.5527	85.5536	-1.79913	4.0187e-05	putative glutaminase	Other categories	Other
37810	15.7618	10.4338	1.51065	0.0195338	methyltransferase type 11	Other categories	Other
37820	287.246	181.286	1.58449	0.00965344	beta-lactamase-like protein	Other categories	Other
37850	27.0681	51.2377	-1.89292	1.88711e-05	hypothetical protein	Hypothetical
37940	76.4031	28.655	2.66631	5.61757e-11	amino acid ABC-transporter permease protein	Transport and binding proteins
37950	272.409	123.903	2.19857	3.53192e-08	single-stranded DNA-binding protein	Other categories	Other
38000	59.7428	125.159	-2.09496	7.95799e-08	Na+/H+ antiporter	Transport and binding proteins
38110	1968	1157.42	1.70033	0.00170098	SOS-response transcriptional repressor LexA	Regulatory functions
38140	44.6153	61.404	-1.3763	0.0229004	pyruvate-flavodoxin oxidoreductase	Photosynthesis and respiration	Soluble electron carriers
38260	40.7938	14.8036	2.75567	0.00249683	hypothetical protein	Hypothetical
38320	74.4953	103.554	-1.39007	0.016805	N-acyl-L-amino acid amidohydrolase	Amino acid biosynthesis	Glutamate family / Nitrogen assimilation
38390	314.222	205.699	1.52758	0.00273867	hypothetical protein	Hypothetical
38400	56.4662	27.5775	2.04755	1.88443e-06	putative translation initiation factor EIF-2b subunit 1	Translation	Protein modification and translation factors
38440	65.8206	29.0771	2.26366	6.79172e-07	two component transcriptional regulator	Regulatory functions
38450	717.644	3196.34	-4.45394	2.22045e-16	phosphoribulokinase	Photosynthesis and respiration	CO2 fixation
38470	8.14218	4.94795	1.64557	0.0107155	putative diguanylate cyclase/phosphodiesterase	Other categories	Other
38500	23.3012	12.6149	1.84712	0.000129149	hypothetical protein	Hypothetical
38510	66.5355	34.1843	1.94638	0.000103034	hypothetical protein	Hypothetical
38520	30.1509	13.0486	2.31066	0.000430348	hypothetical protein	Hypothetical
38540	75.2108	103.809	-1.38024	0.0224687	hypothetical protein	Hypothetical
38550	32.526	65.4508	-2.01226	0.0201626	McyC protein	Other categories	Other
38560	47.0949	96.8029	-2.05549	0.000171433	McyB protein	Other categories	Other
38570	68.1124	125.169	-1.83768	0.000291848	McyA protein	Other categories	Other
38600	96.6734	157.496	-1.62916	0.00844838	McyD protein	Other categories	Other
38610	95.4991	181.184	-1.89723	0.00049226	McyE protein	Other categories	Other
38620	91.8247	141.309	-1.5389	0.00213119	McyF protein	Other categories	Other
38700	6920.55	2299.28	3.00988	1.56186e-10	hypothetical protein	Hypothetical
38740	15.9594	6.73869	2.36832	2.31202e-06	hypothetical protein	Hypothetical
38750	57.8752	25.6554	2.25587	0.0179314	unknown protein	Unknown
38770	1951.97	4062.77	-2.08137	7.21662e-07	unknown protein	Unknown
38790	182.3	257.257	-1.41117	0.0138167	probable glycosyl transferase	Other categories	Drug and analog sensitivity
38820	192.188	96.6187	1.98914	1.46584e-05	phosphoenolpyruvate carboxylase	Energy metabolism	Pyruvate and acetyl-CoA metabolism
38840	823.91	478.803	1.72077	0.000141175	septum site-determining protein MinE	Cellular processes	Cell division
38880	41.1337	19.2584	2.13588	0.000807322	transposase	Other categories	Transposon-related functions
38990	47.962	84.7887	-1.76783	4.39535e-05	hypothetical protein	Hypothetical
39000	82.7501	129.534	-1.56536	0.00145666	acyl-[acyl-carrier-protein]--UDP-N-acetylglucosamine o-acyltransferase	Cell envelope	Surface polysaccharides, lipopolysaccharides and antigens
39020	437.26	203.322	2.15058	1.48553e-05	glycine dehydrogenase	Energy metabolism	Amino acids and amines
39030	17.5098	11.4605	1.52784	0.00929921	glycosyl transferase family 39	Other categories	Other
39060	275.608	411.234	-1.4921	0.00618804	single-stranded DNA-binding protein	DNA replication, restriction, modification, recombination, and repair
39070	91.397	46.7589	1.95464	2.48877e-06	rod shape-determining protein MreB	Other categories	Other
39080	34.2697	16.0206	2.1391	4.73133e-05	rod shape-determining protein MreC	Other categories	Other
39090	36.5916	18.7808	1.94835	2.18866e-06	penicillin-binding protein	Other categories	Drug and analog sensitivity
39110	168.837	387.589	-2.29564	2.69384e-09	probable branched-chain amino acid aminotransferase	Amino acid biosynthesis	Branched chain family
39130	32.9892	85.377	-2.58803	1.50191e-11	circadian clock protein KaiC homolog	Other categories	Other
39160	39.0914	62.9496	-1.61032	0.000534345	DNA polymerase III alpha subunit	DNA replication, restriction, modification, recombination, and repair
39170	6774.23	29072	-4.29156	0	unknown protein	Unknown
39190	26.8835	12.9766	2.07169	7.7478e-05	two-component sensor histidine kinase	Regulatory functions
39210	66.1625	106.443	-1.60881	0.00066197	chloroplastic outer envelope membrane protein homolog	Cell envelope	Membranes, lipoproteins, and porins
39240	2403.91	7045.83	-2.93099	9.41117e-07	magnesium protoporphyrin IX monomethyl ester [oxidative] cyclase 1 (EC 1.14.13.81)	Biosynthesis of cofactors, prosthetic groups, and carriers	Cobalamin, heme, phycobilin and porphyrin
39250	187.331	86.4333	2.16735	1.2224e-07	hypothetical protein	Hypothetical
39270	40.2133	87.0414	-2.16449	1.33566e-05	diamine acetyltransferase 2	Other categories	Other
39280	78.3921	173.67	-2.2154	1.85957e-05	hypothetical protein	Hypothetical
39300	966.428	180.1	5.36606	0	hypothetical protein	Hypothetical
39550	48.4185	79.3159	-1.63813	0.00890625	hypothetical protein	Hypothetical
39590	1111.56	722.322	1.53887	0.00410258	hypothetical protein	Hypothetical
39640	45.4429	10.6744	4.25719	0	ATP-dependent DNA helicase RecQ	Other categories	Other
39650	9338.62	6183.09	1.51035	0.00302348	hypothetical protein	Hypothetical
39660	700.489	278.48	2.5154	8.79097e-11	putative metalloprotease	Other categories	Other
39670	359.084	174.972	2.05224	3.04017e-07	diacylglycerol kinase	Fatty acid, phospholipid and sterol metabolism
39690	2043.28	9581.5	-4.68927	0	hypothetical protein	Hypothetical
39700	36.5894	228.276	-6.23886	0	phycocyanin operon protein W	Photosynthesis and respiration	Phycobilisome
39730	131.353	305.807	-2.32813	0.00747579	unknown protein	Unknown
39770	223.787	421.198	-1.88214	9.01701e-06	porphobilinogen synthase (EC 4.2.1.24)	Biosynthesis of cofactors, prosthetic groups, and carriers	Cobalamin, heme, phycobilin and porphyrin
39790	15.2845	26.8141	-1.75433	8.7752e-05	cation-transporting P-type ATPase PacL	Transport and binding proteins
39810	16.9038	3.47401	4.86579	0.0142479	hypothetical protein	Hypothetical
39820	41.8201	13.231	3.16077	1.64313e-14	ABC-transporter ATP-binding protein	Transport and binding proteins
39830	57.5024	26.3254	2.18429	1.25634e-07	hypothetical protein	Hypothetical
39930	84.8889	26.3201	3.22525	1.55875e-12	hypothetical protein	Hypothetical
39950	109.979	216.986	-1.97298	2.54061e-06	unknown protein	Unknown
39980	14.2605	7.73385	1.84391	0.000678395	probable helicase protein	Other categories	Other
40000	17.2626	70.2703	-4.07067	0	riboflavin biosynthesis protein RibD	Other categories	Other
40010	1224.85	775.113	1.58022	0.0140163	ammonium/methylammonium permease	Transport and binding proteins
40040	19.0336	38.0897	-2.00118	2.88638e-05	putative hydrolase	Other categories	Other
40060	138.075	189.998	-1.37605	0.0214653	coenzyme F420 hydrogenase subunit beta	Other categories	Other
40120	68.5161	23.0451	2.97313	3.16327e-06	PilT-like protein	Other categories	Other
40150	79.0138	222.393	-2.81461	5.6577e-13	hypothetical protein	Hypothetical
40190	1021.91	516.439	1.97876	2.79165e-06	ParB-like nuclease	Other categories	Other
40200	141.318	72.1514	1.95863	2.89445e-06	hypothetical protein	Hypothetical
40250	43.8599	31.3639	1.39842	0.0202066	putative flavin-containing monoamine oxidase	Other categories	Other
40260	313.978	90.6952	3.4619	1.17684e-14	mannose-1-phosphate guanyltransferase	Energy metabolism	Sugars
40290	1718.54	675.816	2.54291	9.46141e-07	hypothetical protein	Hypothetical
40300	3031.55	1941.98	1.56106	0.0145071	unknown protein	Unknown
40320	538.711	319.351	1.68689	0.000608838	hypothetical protein	Hypothetical
40450	163.916	53.2936	3.07572	0.0135444	hypothetical protein	Hypothetical
40460	107.275	58.1608	1.84446	0.0215035	predicted nucleic acid-binding protein	Other categories	Other
40520	25.0644	59.3018	-2.36598	3.16739e-07	hypothetical protein	Hypothetical
40530	912.031	1509.86	-1.65549	0.00114206	unknown protein	Unknown
40550	3295.01	7937.01	-2.4088	2.45561e-08	hypothetical protein	Hypothetical
40560	3714.11	7077.63	-1.90561	0.000259813	S-adenosylmethionine decarboxylase proenzyme	Other categories	Other
40610	281.819	505.36	-1.79321	2.18098e-05	adenine phosphoribosyltransferase	Purines, pyrimidines, nucleosides, and nucleotides	Interconversions and salvage of nucleosides and nucleotides
40620	89.7851	170.095	-1.89447	3.68178e-06	oligopeptides ABC-transporter permease protein	Transport and binding proteins
40920	204.757	296.394	-1.44754	0.00889436	aspartate carbamoyltransferase	Other categories	Other
41040	118.422	62.4512	1.89623	1.62558e-05	hypothetical protein	Hypothetical
41100	132.711	54.0859	2.45371	3.39317e-08	urease accessory protein E	Central intermediary metabolism	Other
41110	79.7532	53.8183	1.4819	0.01846	hypothetical protein YCF39	Hypothetical
41130	2244.22	5615.01	-2.50199	2.36694e-10	DNA binding protein HU	Translation	Nucleoproteins
41140	43.5647	68.1393	-1.56409	0.00183626	histidinol-phosphate aminotransferase	Other categories	Other
41220	100.557	140.023	-1.39247	0.0180311	probable myo-inositol-1(or 4)-monophosphatase	Other categories	Other
41250	87.2038	61.5443	1.41693	0.015464	homogentisate phytyltransferase	Other categories	Other
41320	1201.85	3387.88	-2.81889	1.27122e-10	hypothetical protein	Hypothetical
41330	28.1514	11.6569	2.415	5.99614e-09	excinuclease ABC subunit B	DNA replication, restriction, modification, recombination, and repair
41340	43.3697	17.2151	2.51928	1.53256e-08	hypothetical protein	Hypothetical
41350	114.747	46.7328	2.45538	2.92513e-10	hypothetical protein	Hypothetical
41360	79.0181	51.468	1.53529	0.00247862	UPF0182 protein	Other categories	Other
41400	59.6025	331.429	-5.56066	0	transketolase, central region	Other categories	Other
41410	308.933	218.639	1.41298	0.0228935	putative capsule polysaccharide export protein precursor	Other categories	Other
41420	108.946	59.5711	1.82884	1.79842e-05	aldo/keto reductase	Other categories	Other
41450	246.686	106.786	2.3101	3.97239e-09	hypothetical protein	Hypothetical
41600	13.267	6.82482	1.94393	0.000224931	peptidase S15	Other categories	Other
41610	106.678	73.6722	1.44801	0.00790511	ABC-transporter ATP-binding protein	Transport and binding proteins
41640	17.8354	26.5102	-1.48638	0.0109787	hypothetical protein	Hypothetical
41730	91.9183	61.5874	1.49249	0.00879419	hypothetical protein	Hypothetical
41750	74.3453	30.9455	2.40246	0.000505977	hypothetical protein	Hypothetical
41780	58.541	34.0838	1.71756	0.000421012	hypothetical protein	Hypothetical
41820	69.7051	48.7265	1.43054	0.0203602	urease accessory protein F	Central intermediary metabolism	Other
41830	170.763	96.8469	1.76323	4.50676e-05	probable glycosyl transferase	Other categories	Other
41850	25.9569	15.5115	1.6734	0.000711329	mechanosensitive ion channel family protein	Other categories	Other
41870	2865.46	721.638	3.97077	3.77476e-15	hypothetical protein	Hypothetical
41890	134.979	209.235	-1.55013	0.00250407	hypothetical protein	Hypothetical
41900	34.7146	19.6847	1.76353	0.000850307	glycosyl transferase	Other categories	Other
42020	130.493	49.5514	2.63349	1.43385e-11	glycosyl transferase family 2	Other categories	Other
42030	1020.13	338.743	3.01152	2.04281e-14	hypothetical protein	Hypothetical
42070	27.6063	16.14	1.71043	0.000626192	precorrin methylase	Other categories	Other
42080	178.307	87.5118	2.03752	3.45422e-07	hypothetical protein	Hypothetical
42190	141.83	384.315	-2.70969	9.90119e-12	RlpA-like lipoprotein precursor	Other categories	Other
42200	34.16	81.4163	-2.38338	2.39065e-08	amino acid transport system ATP-binding protein	Transport and binding proteins
42250	55.9765	24.256	2.30774	5.67385e-08	two-component sensor histidine kinase	Regulatory functions
42300	50.6137	81.8601	-1.61735	0.00214339	hypothetical protein	Hypothetical
42320	59.5409	108.62	-1.82429	1.81841e-05	hypothetical protein	Hypothetical
42330	48.9095	77.6039	-1.58668	0.000904508	hypothetical protein	Hypothetical
42340	140.524	81.7548	1.71885	0.000609308	glyoxalase family protein	Other categories	Other
42350	103.803	72.8548	1.42479	0.0111878	peptidase S8 and S53, subtilisin, kexin, sedolisin	Translation	Degradation of proteins, peptides, and glycopeptides
42370	68.038	29.0119	2.34518	2.04624e-06	two-component response regulator	Regulatory functions
42380	170.421	62.9554	2.70701	2.84477e-08	hypothetical protein	Hypothetical
42390	124.538	46.6565	2.66925	1.57125e-05	hypothetical protein	Hypothetical
42400	251.816	94.6981	2.65915	1.25868e-11	hypothetical protein	Hypothetical
42420	51.6962	84.8572	-1.64146	0.000374438	transposase	Other categories	Transposon-related functions
42450	43.7674	99.3193	-2.26925	5.01525e-09	transposase	Other categories	Transposon-related functions
42470	152.241	100.831	1.50986	0.00292528	polysaccharide export ABC-transporter ATP-binding protein	Other categories	Other
42500	865.652	316.22	2.7375	1.38023e-12	hypothetical protein	Hypothetical
42600	95.0851	65.6809	1.44768	0.00826798	thiamine-phosphate pyrophosphorylase	Biosynthesis of cofactors, prosthetic groups, and carriers	Thiamin
42660	257.779	1332.63	-5.16966	0	ferredoxin I	Photosynthesis and respiration	Soluble electron carriers
42680	39.4234	210.477	-5.33889	0	porphobilinogen deaminase	Biosynthesis of cofactors, prosthetic groups, and carriers	Cobalamin, heme, phycobilin and porphyrin
42720	47.9095	114.826	-2.39673	1.52832e-09	serine/threonine kinase	Regulatory functions
42730	145.564	257.948	-1.77206	3.19296e-05	glycyl-tRNA synthetase alpha chain	Translation	Aminoacyl tRNA synthetases and tRNA modification
42750	628.423	1575.48	-2.50704	3.20297e-11	30S ribosomal protein S10	Translation	Ribosomal proteins: synthesis and modification
42760	750.032	1744.74	-2.32622	3.15837e-06	elongation factor Tu	Translation	Protein modification and translation factors
42770	1110.35	2250.69	-2.02701	0.000813924	elongation factor EF-G	Translation	Protein modification and translation factors
42780	865.802	1711.83	-1.97716	3.90328e-06	30S ribosomal protein S7	Translation	Ribosomal proteins: synthesis and modification
42790	2548.14	4446.62	-1.74505	0.000561066	30S ribosomal protein S12	Translation	Ribosomal proteins: synthesis and modification
42820	25.2894	15.6119	1.61988	0.00989792	plasmid maintenance system antidote protein	Other categories	Other
42840	695.131	1130.05	-1.62566	0.00114015	hypothetical protein	Hypothetical
42850	124.527	179.687	-1.44296	0.00951794	methionyl-tRNA synthetase	Other categories	Other
42860	111.659	61.3803	1.81913	3.81454e-05	phospholipid/glycerol acyltransferase	Other categories	Other
42890	587.622	922.705	-1.57024	0.00639438	unknown protein	Unknown
42940	161.494	107.721	1.49919	0.00776093	type 2 NADH dehydrogenase	Other categories	Other
42980	209.894	97.8332	2.14543	3.72179e-05	2Fe-2S ferredoxin	Photosynthesis and respiration	Soluble electron carriers
42990	77.5236	192.561	-2.4839	1.61505e-10	hypothetical protein	Hypothetical
43000	41.471	89.4653	-2.1573	0.000152648	thioredoxin M	Biosynthesis of cofactors, prosthetic groups, and carriers	Thioredoxin, glutaredoxin, and glutathione
43170	28.2191	68.5697	-2.4299	4.78889e-08	cysteine synthase	Amino acid biosynthesis	Serine family / Sulfur assimilation
43210	24.5984	9.36441	2.6268	1.02067e-05	sulfatase-modifying factor 1 precursor	Other categories	Other
43240	27.9655	13.6871	2.0432	3.06773e-05	sulfatase-modifying factor 1 precursor	Other categories	Other
43290	35.4389	10.8431	3.26834	3.22715e-11	unknown protein	Unknown
43320	795.779	440.757	1.80548	0.000203417	resolvase-like protein	Other categories	Other
43330	200.224	600.373	-2.99851	2.08722e-14	PhoH like protein	Other categories	Adaptations and atypical conditions
43340	2585.1	8545.09	-3.30552	1.94733e-13	50S ribosomal protein L20	Translation	Ribosomal proteins: synthesis and modification
43350	4273.55	13845.2	-3.23974	0	50S ribosomal protein L35	Translation	Ribosomal proteins: synthesis and modification
43410	342.529	56.981	6.01128	0	hypothetical protein	Hypothetical
43440	263.4	143.267	1.83853	1.5235e-05	ribonucleoside-diphosphate reductase beta chain	Purines, pyrimidines, nucleosides, and nucleotides	Purine ribonucleotide biosynthesis
43460	2240.17	1101.98	2.03286	3.93359e-06	ribonucleoside-diphosphate reductase beta chain	Other categories	Other
43500	45.8791	15.4276	2.97383	9.71068e-06	hypothetical protein	Hypothetical
43520	52.055	79.0957	-1.51946	0.00277694	ribonucleotide reductase subunit alpha	Purines, pyrimidines, nucleosides, and nucleotides	Purine ribonucleotide biosynthesis
43550	47.7764	76.028	-1.59133	0.00238645	hypothetical protein	Hypothetical
43570	8.714	18.4322	-2.11524	0.000111618	hypothetical protein	Hypothetical
43590	28.4456	16.2524	1.75024	6.29784e-05	hypothetical protein	Hypothetical
43660	265.328	168.693	1.57285	0.0011172	hypothetical protein	Hypothetical
43670	423.814	4583.54	-10.815	0	phosphoglycerate kinase	Energy metabolism	Glycolysis
43690	1724.89	7748.13	-4.49196	0	photosystem I subunit XI	Photosynthesis and respiration	Photosystem I
43700	31005.3	143084	-4.61482	0	photosystem I subunit VIII	Photosynthesis and respiration	Photosystem I
43710	5.80596	12.9824	-2.23605	1.60956e-06	two-component hybrid sensor and regulator	Regulatory functions
43720	72.3145	122.248	-1.6905	0.000399146	cobalt-chelatase subunit CobN	Other categories	Other
43860	494.799	4921.83	-9.94713	0	unknown protein	Unknown
43870	134.836	3148.86	-23.3533	0	50S ribosomal protein L10	Translation	Ribosomal proteins: synthesis and modification
43880	74.2932	1836.23	-24.716	0	hypothetical protein	Hypothetical
43910	546.042	2860.52	-5.23864	0	30S ribosomal protein S1	Other categories	Other
43920	80.0653	57.1747	1.40036	0.0172091	adenylate cyclase	Other categories	Other
43940	24.4443	14.3864	1.69913	0.0115672	hypothetical protein	Hypothetical
43960	15.6038	33.0489	-2.118	2.74737e-05	hypothetical protein	Hypothetical
43970	215.464	424.601	-1.97064	8.41905e-07	hypothetical protein	Hypothetical
43980	68.3673	46.1729	1.48068	0.004586	hypothetical protein	Hypothetical
44120	243.06	136.447	1.78135	0.0148898	unknown protein	Unknown
44180	64.226	212.694	-3.31165	0	proline-tRNA ligase	Other categories	Other
44250	414.569	2588.75	-6.24444	0	photosystem II manganese-stabilizing polypeptide	Photosynthesis and respiration	Photosystem II
44300	54.4693	99.1819	-1.82088	1.43363e-05	phosphoglucomutase/phosphomannomutase	Other categories	Other
44310	52.1386	99.4034	-1.90652	3.23754e-06	glycolate oxidase Fe-S subunit	Other categories	Other
44320	31.9529	84.0483	-2.63038	1.36737e-11	glycolate oxidase subunit GlcE	Other categories	Other
44340	35.9256	67.3379	-1.87437	1.27978e-05	putative aminotransferase	Amino acid biosynthesis	Aspartate family
44400	37.8456	98.3291	-2.59816	2.74634e-11	FO synthase subunit 2	Other categories	Other
44410	148.237	851.256	-5.74253	0	Psb29 Photosystem II sub-stoichiometric subunit	Other categories	Other
44510	47.464	120.736	-2.54374	5.18845e-11	pyruvate dehydrogenase E1 component, alpha subunit	Energy metabolism	Pyruvate dehydrogenase
44520	926.467	277.326	3.34071	2.95319e-14	hypothetical protein	Hypothetical
44530	173.282	95.6554	1.81152	0.000127389	transposase	Other categories	Transposon-related functions
44540	2226.01	993.102	2.24147	9.36667e-05	unknown protein	Unknown
44590	31.2378	61.6413	-1.97329	2.53452e-06	transposase	Other categories	Transposon-related functions
44630	90.3146	61.7256	1.46316	0.00932266	protein serin/threonin phosphatase	Other categories	Other
44650	1082.84	640.522	1.69056	0.000162631	hypothetical protein	Hypothetical
44660	48.256	125.546	-2.60167	1.00919e-11	extracellular ligand-binding receptor	Transport and binding proteins
44670	79.0647	245.249	-3.10188	9.71087e-05	addiction module toxin YoeB	Other categories	Other
44810	233.368	633.952	-2.71653	4.72067e-13	photosystem I assembly related protein	Photosynthesis and respiration	Photosystem I
44820	409.621	1086.95	-2.65355	5.91014e-11	peptidyl-prolyl cis-trans isomerase B	Translation	Protein modification and translation factors
44840	33.5522	89.8896	-2.6791	9.03033e-12	beta ketoacyl-acyl carrier protein synthase	Other categories	Other
44860	21.5405	14.6461	1.47073	0.0199543	putative lipid-A-disaccharide synthase	Other categories	Other
44890	1672.09	6279.38	-3.75541	0	hypothetical protein	Hypothetical
44900	310.485	631.745	-2.0347	2.66771e-07	transcriptional repressor	Regulatory functions
44910	75.0836	158.617	-2.11254	1.00991e-07	hypothetical protein	Hypothetical
44920	42.1315	71.5161	-1.69745	0.00244071	bacterioferritin comigratory protein homolog	Other categories	Other
44930	348.083	1849.95	-5.31468	0	30S ribosomal protein S2	Translation	Ribosomal proteins: synthesis and modification
44940	417.516	1438.06	-3.44432	6.66134e-16	elongation factor TS	Translation	Protein modification and translation factors
44950	18.3869	56.2525	-3.05938	1.35447e-14	squalene-hopene-cyclase	Fatty acid, phospholipid and sterol metabolism
44990	94.8096	205.348	-2.1659	2.50462e-05	hypothetical protein	Hypothetical
45010	15.902	26.7473	-1.68201	0.00879712	hypothetical protein	Hypothetical
45060	97.7051	163.443	-1.67282	0.00018611	homoserine dehydrogenase	Amino acid biosynthesis	Aspartate family
45100	24.7982	9.19484	2.69697	8.53275e-05	hypothetical protein	Hypothetical
45120	207.387	63.5193	3.26494	5.65281e-11	hypothetical protein	Hypothetical
45180	1.36883	0.40316	3.39525	0.00919267	hypothetical protein	Hypothetical
45220	249.386	494.115	-1.98133	5.80386e-06	urease gamma subunit	Central intermediary metabolism	Other
45230	159.843	348.195	-2.17836	4.61653e-07	urease beta subunit	Central intermediary metabolism	Other
45250	458.999	76.6959	5.98466	0	group 2 RNA polymerase sigma factor SigD	Transcription	RNA synthesis, modification, and DNA transcription
45370	162.21	56.6745	2.86213	0.000396363	hypothetical protein	Hypothetical
45410	31.5604	20.1219	1.56846	0.0160619	TPR repeat precursor	Other categories	Other
45520	12.5169	1.92986	6.48591	0.00101931	hypothetical protein	Hypothetical
45590	71.107	132.417	-1.86222	1.17231e-05	leucyl-tRNA synthetase	Translation	Aminoacyl tRNA synthetases and tRNA modification
45610	131.874	213.544	-1.6193	0.000452432	heterodisulfide reductase subunit B	Other categories	Other
45630	2011.05	920.249	2.18533	7.61226e-08	anti-sigma-factor antagonist	Transcription	RNA synthesis, modification, and DNA transcription
45690	160.51	262.821	-1.63741	0.00140437	hypothetical protein	Hypothetical
45710	4110.69	1859.5	2.21064	4.08658e-06	16.6 kDa small heat shock protein HspA	Cellular processes	Chaperones
45730	24.6033	8.32306	2.95604	7.45927e-10	phospholipid/glycerol acyltransferase	Other categories	Other
45740	15.9411	7.70231	2.06965	0.000992341	protein of unknown function DUF820	Other categories	Other
45750	67.3118	41.6797	1.61498	0.000708384	PmbA protein homolog	Other categories	Other
45760	108.697	41.6976	2.60679	1.19118e-11	hypothetical protein	Hypothetical
45780	63.1726	108.825	-1.72266	8.05011e-05	magnesium protoporphyrin IX chelatase subunit D	Biosynthesis of cofactors, prosthetic groups, and carriers	Cobalamin, heme, phycobilin and porphyrin
45790	143.219	474.706	-3.31455	0	hypothetical protein	Hypothetical
45800	172.527	456.445	-2.64564	3.90776e-12	hypothetical protein	Hypothetical
45820	38.9616	164.062	-4.21086	6.66134e-16	hypothetical protein	Hypothetical
45830	33.5877	61.5685	-1.83307	0.000303786	4-diphosphocytidyl-2C-methyl-D-erythritol synthase	Other categories	Other
45860	24.7292	54.5911	-2.20756	6.77961e-07	1,4-dihydroxy-2-naphthoate synthase	Biosynthesis of cofactors, prosthetic groups, and carriers	Menaquinone and ubiquinone
45870	483.186	812.87	-1.68231	0.000234381	RNA-binding region protein	Translation	Nucleoproteins
45890	14.6158	2.21641	6.59436	0.000349925	pentapeptide repeat containing protein	Other categories	Other
45910	16.0833	27.0213	-1.68008	0.000636675	extracellular solute-binding protein	Transport and binding proteins
45950	22.775	63.5693	-2.79119	2.03371e-12	amidase	Cell envelope	Murein sacculus and peptidoglycan
45960	69.6357	42.827	1.62598	0.000455883	ABC-transporter ATP-binding protein	Transport and binding proteins
45970	1611.34	3257.19	-2.02142	0.000563106	S-adenosylmethionine synthetase	Translation	Aminoacyl tRNA synthetases and tRNA modification
45990	2913.51	5442.38	-1.86798	0.000269579	hypothetical protein	Hypothetical
46020	408.711	1027.64	-2.51434	5.19584e-11	site-specific recombinase	Other categories	Other
46030	268.584	644.772	-2.40063	3.72788e-09	thioredoxin	Other categories	Other
46040	123.183	283.919	-2.30486	3.73792e-07	hypothetical protein	Hypothetical
46050	120.123	230.515	-1.91899	5.19938e-06	CP12 polypeptide	Other categories	Other
46070	680.565	5175.06	-7.60406	0	10 kDa chaperonin	Cellular processes	Chaperones
46080	275.466	2292.57	-8.32252	0	60 kDa chaperonin	Cellular processes	Chaperones
46120	132.499	54.472	2.43242	0.00024389	shikimate 5-dehydrogenase	Other categories	Other
46180	26.4478	15.5557	1.7002	0.000977659	recombinase	Other categories	Other
46190	899.478	34.0736	26.3981	0	cation transporter	Transport and binding proteins
46200	3846.24	166.114	23.1542	0	unknown protein	Unknown
46230	2345.38	7951.58	-3.39032	1.45672e-11	allophycocyanin-B	Photosynthesis and respiration	Phycobilisome
46250	256.154	134.242	1.90815	4.1357e-06	erthyrocyte band 7 integral membrane protein	Other categories	Other
46260	30.9037	19.2956	1.60159	0.00222563	glutathione reductase	Other categories	Other
46270	25.3265	10.4434	2.42512	1.09994e-07	D-alanyl-D-alanine carboxypeptidase/D-alanyl-D-alanine-endopeptidase	Other categories	Other
46280	102.429	171.946	-1.67868	0.000195989	glycogen synthase GlgA	Central intermediary metabolism	Polysaccharides and glycoproteins
46340	51079	152896	-2.99332	3.64153e-14	cytochrome b6-f complex subunit 5	Photosynthesis and respiration	Cytochrome b6/f complex
46350	254.271	413.237	-1.62518	0.000416003	acireductone dioxygenase	Other categories	Other
46380	5.37259	3.18974	1.68433	0.0194135	unknown protein	Unknown
46390	42.3587	16.6377	2.54595	9.47386e-09	NAD-dependent epimerase/dehydratase	Other categories	Other
46400	43.2317	20.7123	2.08725	1.21712e-06	glycosyl transferase family 2	Other categories	Other
46420	33.6889	15.8355	2.12743	8.4128e-07	glycosyl transferase family 39	Other categories	Other
46430	108.322	72.9325	1.48524	0.00482976	NAD-dependent epimerase/dehydratase	Other categories	Other
46440	31.6751	20.7959	1.52314	0.0168588	type III pantothenate kinase	Other categories	Other
46460	54.4335	191.368	-3.51563	0	aminotransferase	Other categories	Other
46480	100.184	191.114	-1.90763	2.74946e-06	NAD-dependent epimerase/dehydratase	Translation	Nucleoproteins
46500	95.2642	40.1913	2.37027	0.0158329	hypothetical protein	Hypothetical
46550	15.7961	27.5227	-1.74237	0.0110463	pilin polypeptide PilA	Cellular processes	Chemotaxis
46620	49.184	116.943	-2.37766	4.93357e-09	magnesium-protoporphyrin IX monomethylester aerobic cyclization protein homolog	Other categories	Other
46640	111.734	265.137	-2.37293	8.394e-10	molybdopterin binding oxidoreductase	Other categories	Other
46690	1471.68	2119.3	-1.44005	0.00820932	BolA-like protein	Other categories	Other
46710	41.746	11.0697	3.7712	9.10519e-08	protein of unknown function DUF820	Other categories	Other
46720	29.2958	9.37455	3.12504	2.02782e-05	protein of unknown function DUF820	Other categories	Other
46740	9.00102	20.6707	-2.29648	4.32375e-05	methylenetetrahydrofolate dehydrogenase (NADP+)	Biosynthesis of cofactors, prosthetic groups, and carriers	Folic acid
46780	364.523	174.678	2.08683	1.39778e-06	periplasmic carboxyl-terminal protease	Translation	Degradation of proteins, peptides, and glycopeptides
46880	117.317	218.075	-1.85885	2.08007e-05	ribonuclease II	Transcription	Degradation of RNA
47000	263.778	110.5	2.38713	0.0163145	unknown protein	Unknown
47010	7273.14	1477.33	4.92317	0	unknown protein	Unknown
47020	146.819	644.179	-4.38757	0	soluble inorganic pyrophosphatase	Central intermediary metabolism	Phosphorus compounds
47030	41.6368	66.9529	-1.60802	0.00233582	putative N-acetylmannosamine-6-phosphate 2-epimerase	Other categories	Other
47040	56.1126	98.1768	-1.74964	6.95967e-05	rieske 2Fe-2S family protein	Other categories	Other
47100	44.1744	69.3601	-1.57014	0.00212853	arginase	Energy metabolism	Amino acids and amines
47180	172.319	243.14	-1.41099	0.0209469	arginase	Energy metabolism	Amino acids and amines
47270	124.377	39.7412	3.12967	7.32747e-14	uroporphyrin-III C-methyltransferase	Biosynthesis of cofactors, prosthetic groups, and carriers	Cobalamin, heme, phycobilin and porphyrin
47280	213.422	95.6224	2.23192	2.34548e-07	protein of unknown function UPF0047	Other categories	Other
47290	1877.49	17388.1	-9.26135	0	photosystem I subunit III PsaF	Photosynthesis and respiration	Photosystem I
47300	14861.9	124599	-8.38379	0	photosystem I subunit IX	Photosynthesis and respiration	Photosystem I
47310	32.2621	101.117	-3.13423	4.44089e-16	hypothetical protein	Hypothetical
47330	310.478	108.974	2.8491	0.000281062	hypothetical protein	Hypothetical
47420	70.1826	123.007	-1.75267	8.23914e-05	extracellular solute-binding protein	Transport and binding proteins
47490	25.4036	12.2538	2.07312	0.00149793	transcriptional activator	Regulatory functions
47500	290.138	519.904	-1.79192	3.36741e-05	hypothetical protein	Hypothetical
47530	325.296	211.916	1.53502	0.00341938	hypothetical protein	Hypothetical
47550	32.6572	48.8855	-1.49693	0.00436589	FHA domain containing protein	Other categories	Other
47560	1730.6	10999.9	-6.35612	2.81553e-12	P700 apoprotein subunit Ia	Photosynthesis and respiration	Photosystem I
47570	1087.43	3859.24	-3.54895	7.27459e-08	P700 apoprotein subunit Ib	Photosynthesis and respiration	Photosystem I
47630	13.6758	0.5	27.3516	0.0208707	unknown protein	Unknown
47790	82.1277	0.5	164.255	0.0189634	unknown protein	Unknown
47870	2167.77	21920.2	-10.1119	0	ribulose bisphosphate carboxylase small subunit	Photosynthesis and respiration	CO2 fixation
47880	1563.08	15245.1	-9.75324	0	possible Rubisco chaperonin	Other categories	Other
47890	816.73	8090.99	-9.90657	0	ribulose bisphosphate carboxylase large subunit	Photosynthesis and respiration	CO2 fixation
47900	138.672	694.433	-5.00774	0	carbon dioxide concentrating mechanism protein CcmN	Photosynthesis and respiration	CO2 fixation
47910	203.07	923.023	-4.54534	0	carbon dioxide concentrating mechanism protein CcmM	Photosynthesis and respiration	CO2 fixation
47920	409.236	2208.68	-5.39708	0	carbon dioxide concentrating mechanism protein CcmL	Photosynthesis and respiration	CO2 fixation
47930	1177.02	2874.68	-2.44234	3.6118e-10	carbon dioxide concentrating mechanism protein CcmK	Photosynthesis and respiration	CO2 fixation
47940	826.984	4525.91	-5.47279	0	carbon dioxide concentrating mechanism protein CcmK	Photosynthesis and respiration	CO2 fixation
47950	1170.82	5001.54	-4.27183	0	hypothetical protein	Hypothetical
47970	326.648	177.229	1.84308	4.57276e-05	tRNA-i(6)A37 modification enzyme	Other categories	Other
47980	114.451	54.6598	2.09388	4.85515e-05	hypothetical protein	Hypothetical
48040	4615.14	8767.76	-1.89978	3.52875e-06	50S ribosomal protein L33	Translation	Ribosomal proteins: synthesis and modification
48050	799.516	1849.97	-2.31386	2.71123e-08	30S ribosomal protein S18	Translation	Ribosomal proteins: synthesis and modification
48140	19.3077	79.4749	-4.11623	0	hemolysin-type calcium-binding region protein	Other categories	Other
48150	138.198	288.225	-2.08559	1.77876e-07	CDP-diacylglycerol-glycerol-3-phosphate 3-phosphatidyltransferase (EC 2.7.8.5)	Fatty acid, phospholipid and sterol metabolism
48160	116.588	514.026	-4.40891	0	delta 6 acyl-lipid desaturase	Fatty acid, phospholipid and sterol metabolism
48260	42.1442	59.4778	-1.41129	0.0157192	L-cysteine/cystine lyase	Other categories	Other
48270	26.295	15.3519	1.71282	0.00061477	hypothetical protein	Hypothetical
48280	2390.84	1263.99	1.8915	5.21751e-06	hypothetical protein	Hypothetical
48290	609.217	376.299	1.61897	0.00082468	hypothetical protein	Hypothetical
48300	109.431	75.5121	1.44918	0.0118155	aldolase/epimerase	Other categories	Other
48320	32.6677	16.7544	1.9498	0.000101814	Mrr restriction system protein	Other categories	Other
48330	273.324	397.435	-1.45408	0.00641433	hypothetical protein YCF58	Hypothetical
48340	1164.89	4888.78	-4.19677	1.15463e-14	phycobilisome rod-core linker polypeptide	Photosynthesis and respiration	Phycobilisome
48350	91.6942	131.705	-1.43635	0.00841295	tRNA (5-methylaminomethyl-2-thiouridylate)-methyltransferase (EC 2.1.1.61)	Translation	Aminoacyl tRNA synthetases and tRNA modification
48360	87.2417	138.307	-1.58533	0.00144394	hypothetical protein	Hypothetical
48380	154.062	1204.41	-7.8177	0	universal stress protein	Other categories	Other
48390	1008	5961.31	-5.914	0	unknown protein	Unknown
48440	12.6075	81.9688	-6.50159	8.03388e-11	unknown protein	Unknown
48620	268.923	85.1905	3.15673	5.97762e-05	hypothetical protein	Hypothetical
48630	791.989	3141.1	-3.96609	0	hypothetical protein	Hypothetical
48640	384.629	2541.16	-6.60678	0	hypothetical protein	Hypothetical
48710	25.4874	40.8789	-1.60389	0.00133341	thiophen and furan oxidation protein	Cellular processes	Detoxification
48720	89.6205	49.5772	1.8077	0.0169677	hypothetical protein	Hypothetical
48730	89.4149	48.9846	1.82537	0.0111301	hypothetical protein	Hypothetical
48740	138.717	68.9116	2.01297	0.00308153	hypothetical protein	Hypothetical
48780	107.193	64.5563	1.66046	0.000293821	transposase	Other categories	Transposon-related functions
48820	93.1491	138.566	-1.48757	0.00430548	alanine racemase	Cell envelope	Murein sacculus and peptidoglycan
48830	147.528	61.7489	2.38916	5.55411e-10	cytochrome P450	Fatty acid, phospholipid and sterol metabolism
48840	53.648	24.2582	2.21154	1.89832e-08	hypothetical protein	Hypothetical
48850	84.0346	51.8636	1.6203	0.0023209	hypothetical protein	Hypothetical
48880	106.26	320.475	-3.01595	1.9984e-15	magnesium protoporphyrin IX chelatase subunit I	Biosynthesis of cofactors, prosthetic groups, and carriers	Cobalamin, heme, phycobilin and porphyrin
48890	67.3434	103.252	-1.53322	0.0130497	hypothetical protein	Hypothetical
48900	97.117	149.253	-1.53684	0.00253333	glycyl-tRNA synthetase beta chain	Translation	Aminoacyl tRNA synthetases and tRNA modification
48910	94.2919	64.8606	1.45376	0.0138793	tRNA--hydroxylase	Other categories	Other
48920	136.277	37.748	3.61018	0	protein of unknown function DUF482	Other categories	Other
48970	147.744	517.028	-3.49949	0	universal stress protein	Other categories	Other
48980	87.3217	221.937	-2.5416	2.94895e-05	leader peptidase I	Cellular processes	Protein and peptide secretion
48990	87.6912	195.854	-2.23345	4.96977e-06	MazG protein homolog	Regulatory functions
49000	410.636	6716.66	-16.3567	0	hypothetical protein	Hypothetical
49110	7.40436	2.66232	2.78117	0.000199499	unknown protein	Unknown
49170	40.9414	86.3802	-2.10985	9.84699e-08	phosphoglucosamine mutase	Other categories	Other
49220	101.214	189.831	-1.87554	0.000111366	RNA polymerase ECF-type (group 3) sigma-E factor	Transcription	RNA synthesis, modification, and DNA transcription
49250	129.955	356.223	-2.74113	9.29701e-13	sulfolipid biosynthesis protein	Fatty acid, phospholipid and sterol metabolism
49310	78.4211	112.812	-1.43854	0.011694	probable hydroxyacylglutathione hydrolase	Energy metabolism	Pyruvate and acetyl-CoA metabolism
49360	8.9534	19.0939	-2.13259	2.78908e-05	hypothetical protein	Hypothetical
49370	265.283	1783.96	-6.72474	0	phycobilisome core-membrane linker polypeptide	Photosynthesis and respiration	Phycobilisome
49400	24.4885	8.68841	2.81852	2.87969e-07	unknown protein	Unknown
49440	316.247	212.419	1.48879	0.00639768	heat shock protein 40	Cellular processes	Chaperones
49450	101.206	68.8452	1.47005	0.0061512	heat shock protein 70	Cellular processes	Chaperones
49470	243.168	148.909	1.633	0.000498665	uncharacterized zinc-type alcohol dehydrogenase-like protein	Other categories	Other
49490	905.71	36932	-40.7768	0	glutamine synthetase inactivating factor IF7	Other categories	Other
49510	139.307	33.3524	4.17682	0	hypothetical protein	Hypothetical
49580	106.565	56.2279	1.89523	8.99225e-06	P-loop containing nucleoside triphosphate hydrolase superfamily	Other categories	Other
49720	110.93	14.7834	7.50369	0.00707843	hypothetical protein	Hypothetical
49740	52.6149	16.7984	3.13214	1.46519e-06	hypothetical protein	Hypothetical
49830	3.88344	1.07388	3.61627	0.0109533	modification methylase NgoBI	Other categories	Other
49840	27.0426	8.58449	3.15017	6.4219e-06	hypothetical protein	Hypothetical
49860	146.931	54.9983	2.67156	6.38622e-12	prohibitin	Other categories	Other
49870	54.6882	1.91321	28.5845	7.20997e-08	hypothetical protein	Hypothetical
49880	202.212	25.6631	7.87948	0.0110557	unknown protein	Unknown
49890	127.581	215.956	-1.6927	0.000171225	two-component sensor histidine kinase	Regulatory functions
49900	28.1812	19.7719	1.42532	0.0224408	unknown protein	Unknown
49930	1039.68	44.4945	23.3665	5.5056e-12	hypothetical protein	Hypothetical
49940	101.229	18.7787	5.39063	0	P-loop containing nucleoside triphosphate hydrolase superfamily	Other categories	Other
50020	771.553	3074.7	-3.98508	2.9976e-13	geranylgeranyl hydrogenase	Biosynthesis of cofactors, prosthetic groups, and carriers	Cobalamin, heme, phycobilin and porphyrin
50060	47.878	87.5908	-1.82946	1.61138e-05	PHA-specific beta-ketothiolase PhaA	Fatty acid, phospholipid and sterol metabolism
50080	187.247	896.596	-4.78831	0	photosystem II extrinsic protein PsbQ	Photosynthesis and respiration	Photosystem II
50100	925.687	3789.88	-4.09413	0	ATP synthase protein I	Photosynthesis and respiration	ATP synthase
50110	335.301	1449.25	-4.32224	0	ATP synthase CF0 A chain AtpI	Photosynthesis and respiration	ATP synthase
50120	2491.58	19145.3	-7.684	0	ATP synthase CF0 C chain AtpH	Photosynthesis and respiration	ATP synthase
50130	302.247	1560.8	-5.16399	0	ATP synthase subunit b'	Photosynthesis and respiration	ATP synthase
50140	142.151	706.236	-4.96821	0	ATP synthase CF0 B chain AtpF	Photosynthesis and respiration	ATP synthase
50150	197.936	855.587	-4.32254	0	ATP synthase CF1 delta chain AtpD	Photosynthesis and respiration	ATP synthase
50160	163.718	615.054	-3.75679	0	ATP synthase CF1 alpha chain AtpA	Photosynthesis and respiration	ATP synthase
50170	213.945	1307.6	-6.11185	0	ATP synthase CF1 gamma chain AtpC	Photosynthesis and respiration	ATP synthase
50180	23.1261	74.5309	-3.2228	2.58082e-12	putative calcium binding hemolysin protein	Other categories	Other
50220	34.2988	69.6628	-2.03106	4.14927e-07	Na-Ca exchanger/integrin-beta4 like	Transport and binding proteins
50240	198.881	93.1683	2.13464	1.00753e-07	alkaline phosphatase-like protein	Other categories	Other
50260	19.5261	12.9599	1.50666	0.018313	hypothetical protein	Hypothetical
50310	83.7343	150.652	-1.79917	2.08627e-05	1-deoxy-d-xylulose 5-phosphate reductoisomerase	Other categories	Other
50330	1238.22	1842.58	-1.48809	0.0229171	delta 9 acyl-lipid desaturase	Fatty acid, phospholipid and sterol metabolism
50360	127.143	50.2922	2.52809	4.43789e-11	hypothetical protein	Hypothetical
50400	157.232	95.9656	1.63842	0.00180678	hypothetical protein	Hypothetical
50410	512.563	71.725	7.14623	0	adenosine/AMP deaminase	Other categories	Other
50440	805.863	1667.16	-2.06879	3.77258e-05	twin-arginine translocation protein like	Other categories	Other
50450	168.541	514.105	-3.05033	9.85878e-14	dihydrolipoamide dehydrogenase	Energy metabolism	Pyruvate dehydrogenase
50480	49.2732	13.3691	3.6856	1.46917e-07	4Fe-4S cluster binding protein like	Other categories	Other
50490	143.961	49.0801	2.93318	1.81723e-09	phosphoglycolate phosphatase	Energy metabolism	Glycolate pathway
50500	1341.12	2101.15	-1.56671	0.00126842	NADH dehydrogenase subunit NdhL	Photosynthesis and respiration	NADH dehydrogenase
50510	285.38	477.935	-1.67473	0.000505316	hypothetical protein	Hypothetical
50570	66.1872	35.1672	1.88207	0.00132278	ribosomal protein S6 modification protein like	Translation	Ribosomal proteins: synthesis and modification
50590	148.66	84.7538	1.75402	9.2521e-05	hypothetical protein YCF45	Hypothetical
50600	47.4589	29.4589	1.61102	0.00170166	4Fe-4S ferredoxin, iron-sulfur binding protein	Other categories	Other
50640	238.442	835.392	-3.50354	0	hypothetical protein	Hypothetical
50680	28.1541	138.034	-4.9028	0	ribosomal protein L11 methyltransferase	Translation	Ribosomal proteins: synthesis and modification
50690	64.5533	333.11	-5.16023	0	D-3-phosphoglycerate dehydrogenase	Amino acid biosynthesis	Serine family / Sulfur assimilation
50730	11.3992	5.82724	1.95619	1.36905e-05	adenine-specific methylase like	Other categories	Other
50840	14.3948	22.7926	-1.58339	0.00274391	putative diflavin flavoprotein A 1	Other categories	Other
50880	8.22885	4.72155	1.74283	0.000561092	hypothetical protein	Hypothetical
51050	35.8426	57.3997	-1.60144	0.00137531	transposase	Other categories	Transposon-related functions
51120	41.2839	68.0846	-1.64918	0.00159142	haloacid dehalogenase-like hydrolase	Other categories	Other
51130	251.926	593.869	-2.35732	1.63789e-09	nitrilase homolog	Amino acid biosynthesis	Glutamate family / Nitrogen assimilation
51140	169.069	996.393	-5.89341	0	unknown protein	Unknown
51160	488.217	2870.06	-5.87866	0	unknown protein	Unknown
51180	1099.7	332.182	3.31053	1.68754e-14	hypothetical protein YCF34	Hypothetical
51190	242.364	44.1738	5.4866	3.92431e-08	hypothetical protein	Hypothetical
51200	680.493	165.797	4.10437	0.00700492	hypothetical protein	Hypothetical
51210	7.22546	4.49696	1.60674	0.00716003	DNA modification methyltransferase related protein	Other categories	Other
51230	51644.2	138813	-2.68787	8.28337e-12	photosystem II reaction center I protein PsbI	Photosynthesis and respiration	Photosystem II
51240	25.628	9.86595	2.59762	4.67625e-06	tetrapyrrole methylase family protein	Other categories	Other
51250	76.3773	49.2896	1.54956	0.00182237	hypothetical protein YCF84	Hypothetical
51310	225.007	645.528	-2.86892	5.32643e-05	hypothetical protein	Hypothetical
51320	179.317	424.401	-2.36676	1.94311e-07	hypothetical protein	Hypothetical
51330	1397.85	3592.38	-2.56993	7.20965e-06	photosystem II PsbX protein	Photosynthesis and respiration	Photosystem II
51340	699.691	425.926	1.64275	0.000430192	hypothetical protein	Hypothetical
51360	25.147	14.0956	1.78403	0.00191794	adenine-specific DNA metylase	Other categories	Other
51400	375.025	598.023	-1.59462	0.00792508	unknown protein	Unknown
51450	12.8038	18.6362	-1.45552	0.015469	reverse transcriptase	Other categories	Other
51570	749.947	288.615	2.59843	1.15587e-07	hypothetical protein	Hypothetical
51580	177.972	77.5702	2.29433	0.000525533	hypothetical protein	Hypothetical
51610	17.9999	29.0439	-1.61356	0.00318653	sulfate transport system substrate-binding protein	Transport and binding proteins
51630	17.1071	42.7975	-2.50174	0.00102984	hypothetical protein	Hypothetical
51640	6.0964	19.4317	-3.18741	1.96812e-05	PA-phosphatase related phosphoesterase	Other categories	Other
51650	20.4838	54.1093	-2.64157	5.36199e-10	putative thiosulfate sulfurtransferase precursor	Other categories	Other
51690	10.3609	5.10999	2.02758	0.00675861	cysteine synthase	Other categories	Other
51710	55.0298	116.612	-2.11907	4.02774e-07	unknown protein	Unknown
51760	279.05	128.52	2.17126	0.00405207	hypothetical protein	Hypothetical
51820	323.017	161.326	2.00226	1.99057e-06	O-acetylhomoserine/O-acetylserine sulfhydrylase	Other categories	Other
51830	335.664	220.753	1.52054	0.00472572	transposase	Other categories	Transposon-related functions
51840	2517.81	920.642	2.73484	6.87106e-11	O-acetylhomoserine/O-acetylserine sulfhydrylase	Other categories	Other
51850	32.6601	8.57673	3.80799	1.49012e-09	band 7 protein like	Other categories	Other
51870	741.084	261.724	2.83155	2.39305e-10	hypothetical protein	Hypothetical
51920	20.8786	13.4976	1.54684	0.0151934	sulfate transport system ATP-binding protein	Transport and binding proteins
51940	15.5262	5.40202	2.87415	0.012474	hypothetical protein	Hypothetical
51950	4.56274	10.7531	-2.35672	0.00330821	cadmium resistance transporter	Other categories	Other
51980	83.7627	47.9605	1.74649	0.000126732	putative phosphatidylserine decarboxylase	Other categories	Other
51990	32.1867	14.5572	2.21105	0.00262507	hypothetical protein	Hypothetical
52000	38.0539	20.4251	1.86309	8.45995e-06	putative type II DNA modification enzyme	Other categories	Other
52050	74.4292	27.6482	2.69201	1.58919e-05	hypothetical protein	Hypothetical
52130	133.542	458.487	-3.43328	3.77476e-15	hypothetical protein	Hypothetical
52210	58.5945	84.1107	-1.43547	0.0124256	metal dependent phosphohydrolase HD region	Other categories	Other
52260	368.082	1188.43	-3.22871	1.45106e-12	NADH dehydrogenase subunit 7	Photosynthesis and respiration	NADH dehydrogenase
52320	66.277	209.874	-3.16662	2.22045e-16	phosphoglucomutase	Other categories	Other
52360	139.774	55.7153	2.50872	0.000726167	esterase	Other categories	Other
52430	342.051	65.0919	5.25489	4.78046e-10	unknown protein	Unknown
52440	140.274	55.0069	2.55012	0.000210185	abortive infection protein like	Other categories	Other
52450	2874.14	786.947	3.65227	5.80203e-13	ATP-dependent Clp protease adaptor protein ClpS	Other categories	Other
52490	1052.35	2980.12	-2.83187	1.88738e-13	50S ribosomal protein L31	Translation	Ribosomal proteins: synthesis and modification
52500	182.401	793.486	-4.35023	0	30S ribosomal protein S9	Translation	Ribosomal proteins: synthesis and modification
52510	455.455	1357.49	-2.98051	8.43769e-15	50S ribosomal protein L13	Translation	Ribosomal proteins: synthesis and modification
52520	451.043	1424.55	-3.15835	2.42695e-13	tRNA pseudouridine synthase 1	Translation	Aminoacyl tRNA synthetases and tRNA modification
52530	1024.37	2617.72	-2.55544	4.50162e-11	50S ribosomal protein L17	Translation	Ribosomal proteins: synthesis and modification
52540	894.919	2590.07	-2.89419	2.7251e-09	RNA polymerase alpha subunit	Transcription	RNA synthesis, modification, and DNA transcription
52550	780.859	2499.82	-3.20137	4.44089e-16	30S ribosomal protein S11	Translation	Ribosomal proteins: synthesis and modification
52560	1399.98	4302.56	-3.0733	2.04281e-13	30S ribosomal protein S13	Translation	Ribosomal proteins: synthesis and modification
52570	3072.78	7014.26	-2.28271	9.92853e-09	hypothetical protein	Hypothetical
52610	100.777	60.214	1.67365	0.000368939	hypothetical protein	Hypothetical
52630	126.807	78.6878	1.61152	0.000732173	creatininase	Other categories	Other
52640	95.1312	143.768	-1.51126	0.00322786	two-component response regulator OmpR subfamily	Regulatory functions
52650	51.1343	72.847	-1.42462	0.0111484	two-component sensor histidine kinase	Regulatory functions
52660	426.277	134.919	3.1595	8.88178e-16	phosphate transport system regulatory protein PhoU	Regulatory functions
52680	474.259	1095.4	-2.30971	2.74457e-09	NADH dehydrogenase I subunit N	Other categories	Other
52690	130.902	250.806	-1.91598	4.4035e-06	glutamyl-tRNA synthetase	Translation	Aminoacyl tRNA synthetases and tRNA modification
52710	75.6092	127.981	-1.69266	0.000147339	phosphofructokinase	Energy metabolism	Glycolysis
52760	25.0273	5.96674	4.19447	5.33373e-12	hypothetical protein	Hypothetical
52770	113.062	51.5357	2.19386	6.50708e-08	hypothetical protein	Other categories	Other
52800	44.4046	71.2724	-1.60507	0.000794141	thioredoxin reductase	Other categories	Other
52850	112.21	164.115	-1.46257	0.016771	cyclic nucleotide-binding domain like	Other categories	Other
52860	41.5552	59.7628	-1.43815	0.0134948	methionyl-tRNA formyltransferase	Other categories	Other
52880	576.772	330.102	1.74725	0.000684336	hypothetical protein	Hypothetical
52890	45.0939	26.0424	1.73156	7.84263e-05	primosomal protein N'	DNA replication, restriction, modification, recombination, and repair
52900	131.12	79.034	1.65903	0.000277815	group 2 RNA polymerase sigma factor SigE	Transcription	RNA synthesis, modification, and DNA transcription
52910	21.9498	36.2725	-1.65252	0.00121606	cysteine desulfurase like	Other categories	Other
52920	77.4093	175.998	-2.2736	1.29126e-08	group 3 RNA polymerase sigma factor SigF	Transcription	RNA synthesis, modification, and DNA transcription
52930	39.3023	24.9484	1.57534	0.00316256	holliday junction DNA helicase RuvB	DNA replication, restriction, modification, recombination, and repair
52940	15.0289	8.75074	1.71744	0.0228578	cyclase	Amino acid biosynthesis	Aromatic amino acid family
52970	28.4964	48.3747	-1.69757	0.000405775	hypothetical protein	Hypothetical
52980	17.7114	40.8766	-2.30793	6.48476e-07	ribonuclease H like	Transcription	Degradation of RNA
53000	286.677	624.083	-2.17696	2.26915e-08	iron-sulfur cluster-binding protein like	Other categories	Other
53020	171.322	110.765	1.54672	0.00201668	hypothetical protein	Hypothetical
53090	807.214	1826.51	-2.26273	4.8214e-07	hypothetical protein	Hypothetical
53130	86.1975	207.502	-2.40729	2.41353e-10	3-isopropylmalate dehydratase large subunit	Amino acid biosynthesis	Branched chain family
53140	11.1618	20.4701	-1.83394	0.000827787	glycosyl transferase family 4	Other categories	Other
53170	22.0647	40.822	-1.8501	2.40587e-05	ABC-transporter ATP-binding protein	Transport and binding proteins
53230	156.46	62.4062	2.50712	7.85232e-11	D-alanyl-D-alanine carboxypeptidase	Other categories	Other
53240	67.1428	43.0876	1.55829	0.00224564	ABC-transporter ATP-binding protein	Transport and binding proteins
53250	12.0741	7.26561	1.66182	0.0155413	potassium-transporting P-type ATPase D chain	Transport and binding proteins
53260	23074.5	113723	-4.92851	6.66134e-16	photosystem II reaction center M protein	Photosynthesis and respiration	Photosystem II
53300	34.7889	20.5433	1.69344	0.00257291	ABC-transporter permease protein	Transport and binding proteins
53330	10.0355	5.29228	1.89625	0.0110319	acyl-CoA dehydrogenase	Other categories	Other
53370	114.918	251.435	-2.18795	3.40304e-08	ADP-ribose pyrophosphatase	Other categories	Other
53380	1874.16	3970.49	-2.11854	1.59712e-07	30S ribosomal protein S14	Translation	Ribosomal proteins: synthesis and modification
53390	281.64	803.443	-2.85273	1.44567e-09	polyribonucleotide nucleotidyltransferase	Transcription	RNA synthesis, modification, and DNA transcription
53430	58.8247	110.511	-1.87865	5.25781e-06	arginine biosynthesis bifunctional protein ArgJ	Amino acid biosynthesis	Glutamate family / Nitrogen assimilation
53440	2915.56	7317.63	-2.50985	7.9033e-11	hypothetical protein	Hypothetical
53470	12.3298	2.01495	6.11916	6.81618e-05	cellulose synthase	Other categories	Other
53500	146.009	67.6143	2.15944	2.72891e-05	hypothetical protein	Hypothetical
53520	27.0595	19.083	1.41799	0.0220952	UDP-N-acetylmuramoylalanyl-D-glutamate--2,6-diaminopimelate ligase	Other categories	Other
53540	168.782	343.479	-2.03505	6.37628e-07	transposase	Other categories	Transposon-related functions
53550	65.6814	17.6613	3.71894	0	serine/threonine protein kinase	Regulatory functions
53570	385.937	694.526	-1.79958	0.000144877	delta 12 acyl-lipid desaturase	Other categories	Other
53650	86.016	58.1318	1.47967	0.00457053	peptidase M50	Other categories	Other
53680	58.7837	81.7749	-1.39112	0.0170492	signal recognition particle protein	Cellular processes	Protein and peptide secretion
53690	396.335	206.067	1.92333	3.79626e-06	hypothetical protein	Hypothetical
53730	6.77587	1.388	4.88175	4.96698e-05	pentapeptide repeat family protein	Other categories	Other
53740	27.8657	41.6782	-1.49568	0.00479168	exopolyphosphatase	Central intermediary metabolism	Phosphorus compounds
53770	217.213	661.372	-3.04481	3.81917e-13	hypothetical protein	Hypothetical
53800	15.457	23.5941	-1.52643	0.0123688	C-5 cytosine-specific DNA-methylase	Other categories	Other
53810	184.738	97.2588	1.89945	0.000180555	hypothetical protein	Hypothetical
53840	1039.82	131.663	7.89759	0	unknown protein	Unknown
53850	143.442	222.424	-1.55062	0.00172346	chromosome partitioning protein	DNA replication, restriction, modification, recombination, and repair
53860	95.0821	922.787	-9.70516	0	light-independent protochlorophyllide reductase subunit ChlB	Biosynthesis of cofactors, prosthetic groups, and carriers	Cobalamin, heme, phycobilin and porphyrin
53890	56.6618	82.718	-1.45985	0.00856664	lipoic acid synthetase	Biosynthesis of cofactors, prosthetic groups, and carriers	Lipoate
53930	21.3063	8.16912	2.60815	3.93383e-09	DNA polymerase III gamma/tau subunit	DNA replication, restriction, modification, recombination, and repair
53960	265.173	34.2289	7.74705	0	ferredoxin-nitrate reductase	Amino acid biosynthesis	Glutamate family / Nitrogen assimilation
53980	151.856	90.2666	1.68231	0.000192456	alpha/beta fold family hydrolase	Other categories	Other
54000	7155.22	17915.6	-2.50385	7.63383e-11	photosystem II reaction center protein H	Photosynthesis and respiration	Photosystem II
54070	140.864	334.859	-2.37718	4.76245e-10	ribonuclease Z	Transcription	Degradation of RNA
54080	34.0005	71.1067	-2.09134	1.11164e-07	hypothetical protein	Hypothetical
54140	28.0329	13.3064	2.10672	1.2271e-05	hypothetical protein	Hypothetical
54200	66.4184	35.6283	1.8642	0.013945	hypothetical protein	Hypothetical
54230	126.39	82.6144	1.52988	0.00544132	unknown protein	Unknown
54240	70.0203	49.8943	1.40337	0.0148143	oxidoreductase alpha subunit	Other categories	Other
54300	92.9272	54.9989	1.68962	0.000364602	HAD-superfamily hydrolase subfamily IA, variant 3	Other categories	Other
54350	24.7937	44.4802	-1.79401	5.38748e-05	pantothenate synthetase/cytidylate kinase	Biosynthesis of cofactors, prosthetic groups, and carriers	Pantothenate
54360	30.0633	21.1958	1.41836	0.0160644	hypothetical protein	Hypothetical
54380	982.292	1489.04	-1.51588	0.00571291	FKBP-type peptidyl-prolyl cis-trans isomerase	Other categories	Other
54390	244.569	1789.19	-7.31569	0	photosystem II reaction center 13 kDa protein	Photosynthesis and respiration	Photosystem II
54430	17.3504	10.2635	1.6905	0.00192709	ATP-dependent DNA helicase DinG	Other categories	Other
54440	32.2965	11.3547	2.84433	4.76743e-11	FAD dependent oxidoreductase	Other categories	Other
54450	199.955	89.285	2.23951	1.18745e-06	hypothetical protein	Hypothetical
54470	1448.66	766.872	1.88905	0.000492114	principal RNA polymerase sigma factor SigA	Other categories	Other
54480	5108.96	7934.69	-1.55309	0.00597372	30S ribosomal protein S20	Translation	Ribosomal proteins: synthesis and modification
54490	554.509	884.933	-1.59589	0.0022043	deoxyribonuclease	Other categories	Other
54520	150.139	314.617	-2.0955	1.45975e-05	RNA polymerase beta prime subunit	Transcription	RNA synthesis, modification, and DNA transcription
54540	232.592	120.536	1.92965	2.33063e-06	PpiC-type peptidyl-prolyl cis-trans isomerase	Other categories	Other
54550	149.946	94.2168	1.5915	0.00262628	ABC-transporter ATP-binding protein	Transport and binding proteins
54560	166.011	113.931	1.45712	0.0241395	hemolysin secretion protein	Cellular processes	Cell killing
54580	437.422	176.505	2.47824	3.98014e-08	transcriptional regulator	Regulatory functions
54710	140.423	53.4947	2.62499	5.82084e-05	hypothetical protein	Hypothetical
54830	55.6393	32.1856	1.7287	9.06602e-05	hypothetical protein	Hypothetical
54840	4122.24	2222.8	1.85453	8.36749e-05	hypothetical protein	Hypothetical
54850	234.509	667.461	-2.84621	3.46856e-12	inosine-5'-monophosphate dehydrogenase (EC 1.1.1.205)	Purines, pyrimidines, nucleosides, and nucleotides	Purine ribonucleotide biosynthesis
55010	41.5886	7.47499	5.5637	5.77449e-05	tetratricopeptide TPR_2	Other categories	Other
55020	197.109	27.5821	7.14627	0.0168935	unknown protein	Unknown
55030	9.36575	1.01054	9.26806	0.00225333	tetratricopeptide TPR_2	Other categories	Other
55070	84.9066	8.15085	10.4169	0	tetratricopeptide TPR_2	Other categories	Other
55090	226.758	120.663	1.87927	2.80568e-05	death on curing protein	Other categories	Other
55100	1012.21	510.401	1.98317	1.51386e-05	transcriptional regulator/antitoxin MazE	Regulatory functions
55190	47.8145	97.6716	-2.04272	3.04087e-05	pentapeptide repeat family protein	Other categories	Other
55290	113.581	171.808	-1.51265	0.00978723	cupin	Other categories	Other
55310	102.092	283.635	-2.77823	2.02505e-13	transposase	Other categories	Transposon-related functions
55340	85.0762	26.3783	3.22523	1.9067e-09	unknown protein	Unknown
55390	623.607	1894.6	-3.03813	1.33227e-15	carbon dioxide concentrating mechanism protein CcmK	Photosynthesis and respiration	CO2 fixation
55400	118.031	636.843	-5.39556	0	carbon dioxide concentrating mechanism protein CcmK	Photosynthesis and respiration	CO2 fixation
55440	178.053	68.9722	2.58152	3.16578e-11	pyruvate kinase	Energy metabolism	Glycolysis
55530	8.90066	5.34812	1.66426	0.00960509	molybdate ABC-transporter permease protein	Transport and binding proteins
55640	54.2222	24.0725	2.25245	2.31933e-07	transposase	Other categories	Transposon-related functions
55650	60.4988	18.3851	3.29064	3.77032e-13	hypothetical protein	Hypothetical
55660	27.6409	7.72466	3.57827	3.27159e-07	mannose-1-phosphate guanyltransferase	Other categories	Other
55670	57.1746	23.9434	2.38791	1.40988e-08	GHMP kinase	Other categories	Other
55680	208.488	76.5172	2.72472	3.09908e-12	phosphoheptose isomerase	Cell envelope	Surface polysaccharides, lipopolysaccharides and antigens
55720	503.174	225.5	2.23137	0.00738622	hypothetical protein	Hypothetical
55730	368.833	68.3426	5.39682	0.000199066	hypothetical protein	Hypothetical
55750	138.004	46.9397	2.94003	0.000145821	hypothetical protein	Hypothetical
55790	150.059	65.3011	2.29796	0.000794201	hypothetical protein	Hypothetical
55800	74.1985	43.7502	1.69596	0.019355	hypothetical protein	Hypothetical
55820	109.862	65.4362	1.67892	0.0106913	hypothetical protein	Hypothetical
55840	436.211	212.207	2.05559	0.00318513	hypothetical protein	Hypothetical
55850	474.752	145.295	3.2675	1.7829e-08	hypothetical protein	Hypothetical
55860	1108.42	183.487	6.04086	0	hypothetical protein	Hypothetical
55870	168.818	271.587	-1.60876	0.00175751	Fe-S-cluster oxidoreductase-like	Other categories	Other
55890	14.4545	9.28115	1.5574	0.0105974	unknown protein	Unknown
55920	134.507	83.5117	1.61064	0.000876695	hypothetical protein	Hypothetical
55930	886.223	424.553	2.08743	4.74934e-07	hypothetical protein	Hypothetical
55950	269.77	857.35	-3.17808	1.56652e-12	NAD(P)H-quinone oxidoreductase chain 2	Photosynthesis and respiration	NADH dehydrogenase
55960	288.335	147.291	1.95759	0.000624672	hypothetical protein	Hypothetical
55980	13.4235	9.29508	1.44415	0.0234771	Type I restriction enzyme EcoEI M protein homolog	Other categories	Other
55990	26.7018	65.556	-2.45512	2.59479e-09	GTP-binding protein	Other categories	Other
56010	55.7886	79.9717	-1.43348	0.00921763	elongation factor EF-G	Translation	Protein modification and translation factors
56060	195.972	52.6102	3.72498	0.0153045	unknown protein	Unknown
56070	294.408	110.471	2.66503	1.60857e-09	FdxN element excision controlling factor protein like	Other categories	Other
56080	62.316	10.5637	5.89907	2.04618e-07	FdxN element excision controlling factor protein like	Other categories	Other
56120	237.888	100.881	2.35811	0.00799985	hypothetical protein	Hypothetical
56130	419.855	153.686	2.7319	0.00244449	hypothetical protein	Hypothetical
56160	129.085	25.9761	4.96938	0.00714009	unknown protein	Unknown
56170	64.3331	8.84488	7.27348	0.00330443	plasmid stabilization system protein like	Other categories	Other
56180	287.266	68.653	4.18432	8.66685e-07	hypothetical protein	Hypothetical
56240	46.9336	15.0188	3.12499	1.11022e-15	tetratricopeptide repeat protein 28 like	Other categories	Other
56250	25.5892	44.1356	-1.72477	0.000135023	succinate dehydrogenase flavoprotein subunit	Other categories	Other
56280	85.2528	5271.33	-61.8318	0	cytochrome c553	Photosynthesis and respiration	Soluble electron carriers
56290	54.1612	103.197	-1.90537	2.96282e-06	hypothetical protein	Hypothetical
56330	78.7408	233.758	-2.9687	4.92939e-14	anti-ECFsigma factor like	Other categories	Other
56350	138.171	580.738	-4.20304	0	hypothetical protein	Hypothetical
56360	19.7676	33.7318	-1.70642	0.00204822	cobyric acid synthase like	Biosynthesis of cofactors, prosthetic groups, and carriers	Cobalamin, heme, phycobilin and porphyrin
56370	44.0464	74.5476	-1.69248	0.00020107	UDP-N-acetylmuramyl tripeptide synthetase like	Other categories	Other
56380	156.003	59.0588	2.64149	5.47162e-12	serine protease do-like precursor	Translation	Degradation of proteins, peptides, and glycopeptides
56410	133.34	81.7598	1.63087	0.000423108	hypothetical protein	Hypothetical
56420	540.542	1686.85	-3.12066	4.44089e-16	NADH dehydrogenase subunit 4L	Photosynthesis and respiration	NADH dehydrogenase
56430	299.357	989.806	-3.30644	0	NADH dehydrogenase subunit J	Photosynthesis and respiration	NADH dehydrogenase
56440	230.854	775.984	-3.36136	0	NADH dehydrogenase subunit I	Photosynthesis and respiration	NADH dehydrogenase
56450	216.763	819.448	-3.78039	0	NADH dehydrogenase subunit H	Photosynthesis and respiration	NADH dehydrogenase
56470	272.247	120.423	2.26076	2.34254e-08	porin type major outer membrane protein like	Cell envelope	Membranes, lipoproteins, and porins
56500	18.7926	27.9405	-1.48678	0.00395552	amino acid adenylation participated protein like	Transport and binding proteins
56510	50.833	107.09	-2.1067	3.41817e-07	3-oxoacyl-[acyl-carrier-protein] reductase like	Other categories	Other
56520	38.4188	66.0521	-1.71927	8.84566e-05	non-ribosomal peptide synthetase	Other categories	Other
56540	53.703	90.6442	-1.68788	0.000328775	3-oxoacyl-[acyl-carrier-protein] reductase like	Other categories	Other
56550	21.5477	45.0227	-2.08944	0.00378833	hypothetical protein	Hypothetical
56570	46.1236	90.7313	-1.96713	0.000224605	isopentenyl-dephosphate delta-isomerase	Other categories	Other
56580	45.2056	65.8774	-1.45728	0.00884002	peptide synthetase	Other categories	Other
56590	42.9956	64.3341	-1.49629	0.00451349	non-ribosomal peptide synthetase/polyketide synthase hybrid enzyme	Other categories	Other
56610	85.9014	59.354	1.44727	0.0108117	SWIM zinc-finger protein	Other categories	Other
56630	70.8825	29.7757	2.38055	1.02075e-09	DNA topoisomerase I	DNA replication, restriction, modification, recombination, and repair
56670	24.5483	10.7141	2.29121	0.000689234	hypothetical protein	Hypothetical
56680	58.9442	214.2	-3.63395	0	iron transport system substrate-binding protein	Other categories	Other
56720	35.4089	17.1496	2.06471	4.68452e-05	creatininase	Other categories	Other
56740	150.728	1099.2	-7.29261	0	nucleoside diphosphate kinase	Purines, pyrimidines, nucleosides, and nucleotides	Interconversions and salvage of nucleosides and nucleotides
56760	187.8	540.952	-2.88047	3.08642e-13	radical S-adenosylmethionine superfamily protein	Other categories	Other
56780	214.028	462.082	-2.15898	4.6974e-08	hypothetical protein	Hypothetical
56790	346.688	1073.74	-3.09714	6.66134e-16	hypothetical protein	Hypothetical
56800	103.33	28.873	3.57878	4.44089e-15	PBS lyase heat-like repeat	Other categories	Other
56840	30.4699	16.4649	1.8506	0.000622491	hypothetical protein	Hypothetical
56870	145.025	202.55	-1.39666	0.0163564	aspartate transaminase	Energy metabolism	Amino acids and amines
56900	30.2543	48.9167	-1.61685	0.00128544	hypothetical protein	Hypothetical
56910	6.80834	18.1814	-2.67046	8.24798e-07	zinc-containing alcohol dehydrogenase superfamily	Other categories	Other
56920	17.8198	104.574	-5.86842	0	acetyl-CoA carboxylase biotin carboxyl carrier protein	Fatty acid, phospholipid and sterol metabolism
56930	173.09	871.967	-5.03765	0	elongation factor P	Translation	Protein modification and translation factors
56950	39.6931	9.18704	4.32055	0.00119402	putative nucleotidyltransferase domain	Other categories	Other
57030	26.675	10.9466	2.43683	1.20688e-05	hypothetical protein	Hypothetical
57040	8.4467	3.67893	2.29597	0.00825077	transposase	Other categories	Transposon-related functions
57090	97.8729	70.5859	1.38658	0.0232362	hypothetical protein	Hypothetical
57100	182.332	83.7874	2.17613	3.91151e-08	hypothetical protein	Hypothetical
57110	406.572	179.344	2.267	2.21146e-05	ferredoxin	Photosynthesis and respiration	Soluble electron carriers
57130	102.178	169.98	-1.66357	0.00114038	hypothetical protein	Hypothetical
57140	128.114	229.194	-1.78898	0.000580677	hypothetical protein	Hypothetical
57150	111.021	177.286	-1.59687	0.00165473	ferredoxin-like protein	Photosynthesis and respiration	Soluble electron carriers
57160	29.1301	52.2018	-1.79202	0.000397444	two component transcriptional regulator	Regulatory functions
57180	439.609	629.574	-1.43212	0.0110797	ATP-dependent Clp protease proteolytic subunit	Translation	Degradation of proteins, peptides, and glycopeptides
57190	214.709	329.9	-1.5365	0.00182949	ATP-dependent Clp protease proteolytic subunit	Translation	Degradation of proteins, peptides, and glycopeptides
57240	352.688	1486.35	-4.21435	0	adenylate kinase	Purines, pyrimidines, nucleosides, and nucleotides	Purine ribonucleotide biosynthesis
57250	673.207	1761.85	-2.6171	1.1317e-07	preprotein translocase SecY subunit	Cellular processes	Protein and peptide secretion
57260	188.752	1571.98	-8.32828	0	50S ribosomal protein L15	Translation	Ribosomal proteins: synthesis and modification
57270	91.6294	1152.84	-12.5816	0	30S ribosomal protein S5	Translation	Ribosomal proteins: synthesis and modification
57280	147.299	1979.84	-13.441	0	50S ribosomal protein L18	Translation	Ribosomal proteins: synthesis and modification
57290	123.778	1747.46	-14.1177	0	50S ribosomal protein L6	Translation	Ribosomal proteins: synthesis and modification
57300	219.287	2348.61	-10.7102	0	30S ribosomal protein S8	Translation	Ribosomal proteins: synthesis and modification
57310	283.581	3194.93	-11.2664	0	50S ribosomal protein L5	Translation	Ribosomal proteins: synthesis and modification
57320	294.161	2797.57	-9.51034	0	50S ribosomal protein L24	Translation	Ribosomal proteins: synthesis and modification
57330	337.529	2962.93	-8.7783	0	50S ribosomal protein L14	Translation	Ribosomal proteins: synthesis and modification
57340	869.756	6391.59	-7.34872	0	30S ribosomal protein S17	Translation	Ribosomal proteins: synthesis and modification
57350	470.143	3413.05	-7.2596	1.7506e-11	50S ribosomal protein L29	Translation	Ribosomal proteins: synthesis and modification
57360	238.471	1504.94	-6.31079	0	50S ribosomal protein L16	Translation	Ribosomal proteins: synthesis and modification
57370	105.49	665.843	-6.31191	0	30S ribosomal protein S3	Translation	Ribosomal proteins: synthesis and modification
57380	155.312	883.693	-5.68979	0	50S ribosomal protein L22	Translation	Ribosomal proteins: synthesis and modification
57390	359.074	2265.97	-6.31059	0	30S ribosomal protein S19	Translation	Ribosomal proteins: synthesis and modification
57400	104.147	572.933	-5.5012	0	50S ribosomal protein L2	Translation	Ribosomal proteins: synthesis and modification
57410	154.345	1083.17	-7.01785	6.06326e-10	50S ribosomal protein L23	Translation	Ribosomal proteins: synthesis and modification
57420	130.552	922.97	-7.06975	0	50S ribosomal protein L4	Translation	Ribosomal proteins: synthesis and modification
57430	139.308	1057.34	-7.58994	0	50S ribosomal protein L3	Translation	Ribosomal proteins: synthesis and modification
57440	15317.1	29794.8	-1.9452	3.47012e-06	unknown protein	Unknown
57460	8986.85	3218.3	2.79242	1.9086e-09	nitrogen regulatory protein P-II	Amino acid biosynthesis	Glutamate family / Nitrogen assimilation
57480	520.143	166.404	3.12578	1.11022e-15	hypothetical protein	Hypothetical
57530	94.2274	139.574	-1.48125	0.00435718	acetyl-CoA carboxylase beta subunit	Fatty acid, phospholipid and sterol metabolism
57540	307.906	429.627	-1.39532	0.0172716	ferric uptake regulation protein	Regulatory functions
57550	34.3045	76.8107	-2.23909	0.00342402	phosphoribosylformylglycinamidine synthase PurS	Purines, pyrimidines, nucleosides, and nucleotides	Purine ribonucleotide biosynthesis
57560	38.1907	67.4741	-1.76677	0.000284227	phosphoribosylformylglycinamidine synthase PurL	Purines, pyrimidines, nucleosides, and nucleotides	Purine ribonucleotide biosynthesis
57580	2.48745	6.692	-2.69031	0.00231102	cation efflux system protein	Transport and binding proteins
57590	17.2537	38.0091	-2.20295	8.32802e-07	dTDP-glucose 4,6-dehydratase	Cell envelope	Surface polysaccharides, lipopolysaccharides and antigens
57600	1335.81	3651.28	-2.73338	4.35438e-10	RNA-binding protein like	Other categories	Other
57610	156.173	376.974	-2.41382	3.29889e-10	GTP-binding protein	Other categories	Other
57750	187.223	53.6964	3.4867	0.000515523	hypothetical protein	Hypothetical
57760	54.5517	20.9564	2.6031	6.84403e-06	predicted nucleic acid-binding protein	Other categories	Other
57770	2.19257	1.00904	2.17293	0.000671834	apoptotic protease-activating factor 1 like	Other categories	Other
57780	163.682	76.8758	2.12917	0.000155929	hypothetical protein	Hypothetical
57790	71.8792	108.902	-1.51507	0.00465914	pyridoxamine 5'-phosphate oxidase	Biosynthesis of cofactors, prosthetic groups, and carriers	Pyridoxine
57840	152.747	50.0573	3.05144	3.55271e-15	Proton extrusion protein PcxA	Other categories	Other
57860	261.382	59.1255	4.4208	0	hypothetical protein	Hypothetical
57870	371.83	95.1841	3.90643	0	putative hydrogenase expression/formation protein HypB	Other categories	Hydrogenase
57900	89.1814	59.1832	1.50687	0.00343464	putative hydrogenase expression/formation protein HypE	Other categories	Hydrogenase
57910	111.325	70.0216	1.58987	0.00108695	hypothetical protein	Hypothetical
57930	22.3216	14.2692	1.56432	0.00210143	DNA recombinase	DNA replication, restriction, modification, recombination, and repair
57940	112.823	71.4829	1.57832	0.00267726	hydrogenase subunit of the bidirectional hydrogenase	Other categories	Hydrogenase
58050	27.0456	7.19069	3.7612	0	tetratricopeptide TPR_2	Other categories	Other
58060	26.3901	6.75345	3.90765	7.99139e-13	hypothetical protein	Hypothetical
58130	327.408	16.3182	20.064	0.00429123	unknown protein	Unknown
58190	80.6585	140.002	-1.73574	0.000347746	(3R)-hydroxymyristol acyl carrier protein dehydrase	Fatty acid, phospholipid and sterol metabolism
58260	82.5774	169.54	-2.0531	0.000986948	hypothetical protein	Hypothetical
58270	92.3527	251.709	-2.72552	4.19886e-13	aldo/keto reductase family protein	Other categories	Other
58280	937.774	575.565	1.62931	0.000447258	hypothetical protein	Hypothetical
58340	91.2586	31.3074	2.91492	0.00097327	chromosome segregation protein	Other categories	Other
58370	44.0718	70.4978	-1.59961	0.00809582	site-specific recombinase like	Other categories	Other
58380	117.547	249.179	-2.11982	5.34611e-08	hypothetical protein	Hypothetical
58400	61.2312	112.343	-1.83473	1.00185e-05	NADH dehydrogenase subunit 4 NdhD4	Photosynthesis and respiration	NADH dehydrogenase
58460	5.04691	3.28655	1.53563	0.0131042	hypothetical protein	Hypothetical
58530	39.688	24.2105	1.63929	0.0144169	hypothetical protein	Hypothetical
58550	19.2391	10.4428	1.84233	0.00141703	hypothetical protein	Hypothetical
58570	88.1822	181.959	-2.06344	2.48505e-06	PilT protein-like protein	Other categories	Other
58580	76.4694	39.5557	1.93321	5.28408e-06	hypothetical protein	Hypothetical
58600	341.643	196.345	1.74001	0.000275751	monoglucosyldiacylglycerol synthase	Other categories	Other
58650	1116.74	2221.02	-1.98884	5.85128e-05	unknown protein	Unknown
58660	148.856	306.611	-2.05978	2.72784e-06	hypothetical protein	Hypothetical
58700	20.2124	10.9697	1.84257	0.000299793	cytosine-specific methyltransferase	Other categories	Other
58710	12.0528	4.91115	2.45417	0.00199773	DNA-methyltransferase	Other categories	Other
58720	7.56798	3.15777	2.39662	0.0056457	hypothetical protein	Hypothetical
58730	104.07	145.14	-1.39464	0.0171221	peptide-chain-release factor 3	Translation	Protein modification and translation factors
58740	48.016	150.791	-3.14043	9.76996e-15	phospholipid/glycerol acyltransferase	Other categories	Other
58760	24.2402	14.6244	1.65752	0.00280613	hypothetical protein	Hypothetical
58770	39.8239	13.4977	2.95042	2.70894e-14	hypothetical protein	Hypothetical
58780	42.8158	21.129	2.0264	1.45287e-06	hypothetical protein	Hypothetical
58790	24.595	11.2661	2.1831	5.08793e-06	unknown protein	Unknown
58800	65.081	27.7306	2.3469	2.33638e-06	hypothetical protein	Hypothetical
58840	54.6715	33.9819	1.60884	0.00553382	hypothetical protein	Hypothetical
58860	605.422	2788.19	-4.60537	0	hypothetical protein	Hypothetical
58870	49.7252	34.6414	1.43543	0.0117273	hypothetical protein	Hypothetical
58920	359.254	1284.36	-3.57508	1.95896e-06	unknown protein	Unknown
58930	45.2156	28.2038	1.60317	0.00084548	similar to fibronectin binding protein	Other categories	Other
58970	2037.38	930.107	2.19048	1.62833e-07	hypothetical protein	Hypothetical
58980	224.752	108.097	2.07917	2.31783e-07	hypothetical protein	Hypothetical
58990	70.2566	31.4553	2.23354	2.80274e-08	hypothetical protein	Hypothetical
59010	96.093	51.7445	1.85707	9.31566e-05	hypothetical protein	Hypothetical
59020	63.3209	32.4477	1.95148	4.27184e-05	thiosulfate sulfurtransferase	Other categories	Other
59060	18.7599	32.5004	-1.73244	0.000219466	beta-carotene ketolase	Other categories	Other
59100	72.9676	49.214	1.48266	0.00516647	glycosyl transferase group 1	Other categories	Other
59110	33.3369	15.3136	2.17695	7.74916e-07	arsenical pump membrane protein	Other categories	Other
59130	100.908	50.5938	1.99447	0.00209326	nitrogen regulatory protein P-II	Other categories	Other
59140	93.2154	38.122	2.44519	1.85041e-09	sodium-dependent bicarbonate transporter	Other categories	Other
59160	87.141	120.57	-1.38362	0.0183302	probable glycosyl transferase	Other categories	Other
59170	685.29	1225.14	-1.78777	9.89429e-05	CP12 polypeptide	Other categories	Other
59180	1162.41	4788.53	-4.11948	0	hypothetical protein	Hypothetical
59200	118.24	51.3261	2.3037	1.49402e-07	hypothetical protein	Hypothetical
59220	67.0775	187.784	-2.79951	2.46914e-13	acetyl-coenzyme A synthetase	Energy metabolism	Pyruvate and acetyl-CoA metabolism
59230	3610.42	20487.3	-5.67449	0	photosystem subunit VII	Photosynthesis and respiration	Photosystem I
59320	105.446	51.0092	2.0672	8.83873e-07	hypothetical protein	Hypothetical
59340	53.8413	24.9799	2.15538	3.08703e-06	glutamine amidotransferase, class-II	Other categories	Other
59370	95.8502	260.779	-2.72069	4.91607e-13	threonine synthase	Amino acid biosynthesis	Aspartate family
59400	98.5811	26.6147	3.70401	1.33227e-15	hypothetical protein	Hypothetical
59430	1529.54	278.666	5.48879	0	CAB/ELIP/HLIP superfamily protein	Other categories	Adaptations and atypical conditions
59450	404.435	624.218	-1.54343	0.0132519	hypothetical protein	Hypothetical
59620	98.4002	40.7171	2.41668	0.00962528	hypothetical protein	Hypothetical
59630	366.928	219.592	1.67095	0.000388357	hypothetical protein	Hypothetical
59660	68.6266	364.605	-5.31288	0	hypothetical protein	Hypothetical
59680	36.9116	80.0821	-2.16956	4.01148e-08	UDP-N-acetylglucosamine pyrophosphorylase (EC 2.7.7.23)	Cell envelope	Murein sacculus and peptidoglycan
59730	195.193	341.812	-1.75115	5.35623e-05	hypothetical protein	Hypothetical
59750	54.2711	29.7137	1.82647	5.37748e-05	probable tocopherol cyclase	Other categories	Other
59800	112.44	28.6131	3.92967	0	potassium-transporting P-type ATPase A chain	Transport and binding proteins
59820	56.4303	21.0598	2.67953	3.02069e-12	potassium-transporting P-type ATPase B chain	Other categories	Other
59830	51.5039	11.6069	4.43735	5.1073e-10	cytosine-specific methyltransferase	Other categories	Other
59840	107.528	24.9883	4.30313	4.01023e-07	cytosine-specific methyltransferase	Other categories	Other
59870	20.6753	8.23707	2.51003	0.000478169	potassium-transporting P-type ATPase C chain	Transport and binding proteins
59900	488.687	332.304	1.4706	0.00560342	two-component response regulator	Regulatory functions
59960	181.759	328.903	-1.80956	1.7187e-05	putative methyltransferase	Other categories	Other
59980	8342.59	12321.6	-1.47695	0.0189013	unknown protein	Unknown
59990	721.234	1727.15	-2.39472	2.42464e-09	hypothetical protein	Hypothetical
60060	53.4251	79.4097	-1.48637	0.00399241	ABC-transporter ATP-binding protein McnF	Transport and binding proteins
60070	74.8716	172.417	-2.30284	2.10907e-09	McnG protein	Other categories	Other
60100	17.2625	10.0436	1.71876	0.000977549	GUN4-like protein	Other categories	Other
60140	86.7583	192.896	-2.22337	1.30998e-08	hypothetical protein	Hypothetical
60250	12.4181	5.70885	2.17524	0.00113133	unknown protein	Unknown
60260	19.1755	8.75192	2.191	2.80464e-06	unknown protein	Unknown
60310	57.8773	36.6064	1.58107	0.00221547	cysteine synthase	Other categories	Other
60380	205.888	137.178	1.50088	0.00568336	beta-lactamase-like protein	Other categories	Other
60420	12.7301	6.24186	2.03947	6.06401e-05	TPR repeat protein	Other categories	Other
60430	10.1646	3.86641	2.62895	0.000233327	hypothetical protein	Hypothetical
60560	66.3232	41.2726	1.60695	0.00896981	hypothetical protein	Hypothetical
60590	40.2917	22.4584	1.79406	0.000253126	hypothetical protein	Hypothetical
60600	96.0663	69.187	1.3885	0.0176547	hypothetical protein	Hypothetical
60610	17.0914	8.29472	2.06052	0.00446398	hypothetical protein	Hypothetical
60620	22.1088	13.8687	1.59415	0.0215433	hypothetical protein	Hypothetical
60630	33.215	18.4159	1.8036	0.00267924	hypothetical protein	Hypothetical
60650	174.51	99.7974	1.74864	0.000186678	hypothetical protein	Hypothetical
60660	104.864	205.25	-1.9573	3.15814e-06	zinc-binding CMP/dCMP deaminase	Other categories	Other
60680	37.9864	82.4057	-2.16935	4.87403e-07	cobalamin biosynthesis protein M	Biosynthesis of cofactors, prosthetic groups, and carriers	Cobalamin, heme, phycobilin and porphyrin
60690	13.167	33.3081	-2.52967	0.00653361	putative cobalt transport protein	Other categories	Other
60710	53.2441	26.9344	1.97681	2.16484e-05	ABC-transporter ATP-binding protein	Transport and binding proteins
60750	411.133	148.776	2.76344	2.01952e-10	PBS lyase heat-like repeat	Other categories	Other
60780	199.304	121.084	1.646	0.00564076	hypothetical protein	Hypothetical
60820	77.0423	51.4996	1.49598	0.0107997	clock-associated histidine kinase SasA	Regulatory functions
60860	38.1176	20.0359	1.90247	1.62558e-05	serine/threonine protein kinase	Regulatory functions
60890	53.502	35.6737	1.49976	0.00636344	putative glycosyl transferase	Other categories	Other
60930	710.269	1287.18	-1.81224	2.60455e-05	bacterioferritin comigratory protein	Transport and binding proteins
60940	30.3218	18.8411	1.60934	0.00120378	N-acetylmuramoyl-L-alanine amidase	Cell envelope	Murein sacculus and peptidoglycan
60960	166.604	26.3413	6.32482	0	phosphotransacetylase	Other categories	Other
60970	48.0798	25.873	1.8583	1.17094e-05	Na+/H+ antiporter	Transport and binding proteins
61050	102.562	50.2453	2.04123	0.000692089	FdxN element excision controlling factor protein	Other categories	Other
61180	65.6342	108.556	-1.65395	0.000295119	TPR repeat protein	Other categories	Other
61200	55.7754	139.495	-2.50101	6.6041e-10	ATP phosphoribosyltransferase	Amino acid biosynthesis	Aromatic amino acid family
61210	44.7865	65.5095	-1.46271	0.0122051	HAD-superfamily hydrolase subfamily IA, variant 3	Other categories	Other
61230	33.3167	100.229	-3.00837	1.73839e-12	deoxyribose-phosphate aldolase	Purines, pyrimidines, nucleosides, and nucleotides	Interconversions and salvage of nucleosides and nucleotides
61240	199.539	96.1926	2.07437	2.7398e-06	aconitate hydratase	Other categories	Other
61250	97.7865	13.8095	7.0811	3.44661e-08	hypothetical protein	Hypothetical
61260	35.2641	6.09954	5.78144	1.25366e-12	unknown protein	Unknown
61270	1071.49	2125.75	-1.98392	3.9013e-05	unknown protein	Unknown
61300	6.79901	3.26517	2.08228	0.0192786	hypothetical protein	Hypothetical
61320	605.858	319.54	1.89603	2.63466e-05	hypothetical protein	Hypothetical
61330	47.3278	67.621	-1.42878	0.0097473	urease alpha subunit	Central intermediary metabolism	Other
61450	157.255	47.3764	3.31927	0.000127681	hypothetical protein	Hypothetical
61490	108.766	47.9216	2.26967	0.000233918	hypothetical protein	Hypothetical
61570	40.089	14.4464	2.77502	4.57856e-13	magnesium protoporphyrin IX chelatase subunit H	Biosynthesis of cofactors, prosthetic groups, and carriers	Cobalamin, heme, phycobilin and porphyrin
61610	121.533	194.659	-1.6017	0.000946972	flavoprotein	Other categories	Other
61640	11.8519	2.09487	5.65758	1.18128e-13	putative hydrogenase expression/formation protein HypF	Other categories	Hydrogenase
61650	53.5329	12.3477	4.33546	2.81575e-12	hypothetical protein	Hypothetical
61660	84.6972	35.2306	2.40408	1.28267e-05	hypothetical protein	Hypothetical
61680	73.137	178.904	-2.44615	2.71024e-10	inositol monophosphate family protein	Other categories	Other
61690	477.072	1375.68	-2.88359	4.88432e-12	pentose-5-phosphate-3-epimerase	Energy metabolism	Pentose phosphate pathway
61700	92.6643	42.5583	2.17735	0.000554606	hypothetical protein	Hypothetical
61710	98.5239	30.7068	3.20854	0.00908831	plasmid stabilization system	Other categories	Other
61750	80.5784	114.358	-1.41921	0.0159899	hypothetical protein	Hypothetical
61760	552.795	889.694	-1.60945	0.00741193	hypothetical protein	Hypothetical
61770	659.339	222.9	2.958	1.58404e-11	HNH nuclease	Other categories	Other
61820	160.205	784.665	-4.89788	0	transketolase	Other categories	Other
61860	63.9596	30.3215	2.10938	9.24409e-06	hypothetical protein	Hypothetical
61890	45.3254	84.4676	-1.86358	1.45931e-05	biliverdin reductase	Other categories	Other
61900	58.5514	1714.47	-29.2815	0	hypothetical protein	Hypothetical
61920	10.7741	2.94108	3.66331	0.000102893	unknown protein	Unknown
61930	120.189	46.7979	2.56826	4.54816e-10	phage shock protein A	Other categories	Other
61950	31.6308	15.9251	1.98622	5.71942e-05	plasma membrane protein	Other categories	Other
61960	27.9042	79.7249	-2.85709	8.82627e-13	alanine dehydrogenase	Other categories	Other
61970	254.544	717.382	-2.8183	0.000521261	unknown protein	Unknown
61980	81.2218	125.483	-1.54494	0.00160151	pyridine nucleotide transhydrogenase beta subunit	Biosynthesis of cofactors, prosthetic groups, and carriers	Nicotinate and nicotinamide
61990	1642.38	939.441	1.74825	9.01798e-05	hypothetical protein	Hypothetical
62000	139.49	230.299	-1.65101	0.000416201	leucine aminopeptidase	Translation	Protein modification and translation factors
62010	375.019	724.895	-1.93296	3.29652e-06	transposase	Other categories	Transposon-related functions
62060	817.37	1436.55	-1.75753	0.00346173	cell division protein FtsH	Cellular processes	Cell division
62070	60.8492	99.9142	-1.642	0.000504382	transcriptional regulator	Regulatory functions
62080	25.6229	386.568	-15.0868	4.01901e-13	sulfate permease family protein	Other categories	Other
62090	78.3153	487.015	-6.21864	0	sodium-dependent bicarbonate transporter	Other categories	Other
62100	136.37	723.029	-5.30197	0	hypothetical protein	Hypothetical
62110	25.2778	176.88	-6.99744	0	Na+/H+ antiporter	Transport and binding proteins
62160	327.313	178.035	1.83848	1.62658e-05	transposase	Other categories	Transposon-related functions
62170	583.064	232.346	2.50946	6.64863e-10	transposase	Other categories	Transposon-related functions
62180	12.8851	5.727	2.24989	0.00101829	hypothetical protein	Hypothetical
62190	25.737	10.4181	2.47041	2.18392e-06	hypothetical protein	Hypothetical
62200	175.992	78.9841	2.2282	0.00028356	hypothetical protein	Hypothetical
62210	64.4406	30.1717	2.1358	0.00255441	hypothetical protein	Hypothetical
62230	200.532	125.375	1.59946	0.00082934	hypothetical protein	Hypothetical
62250	95.7159	161.428	-1.68653	0.000174589	probable tRNA/rRNA methyltransferase	Other categories	Other
62280	90.4264	39.9116	2.26567	9.0834e-08	unknown protein	Unknown
62290	1750	807.845	2.16626	0.00103589	unknown protein	Unknown
62300	539.643	229.384	2.35257	0.00157007	hypothetical protein	Hypothetical
62310	23.8652	8.00719	2.98047	0.00130612	hypothetical protein	Hypothetical
62410	7.71025	3.0304	2.5443	0.0125633	hypothetical protein	Hypothetical
62420	9.9309	4.68733	2.11867	0.00411347	membrane bound O-acyl transferase	Other categories	Other
62430	88.1573	37.1574	2.37254	3.05801e-09	FkbM family methyltransferase	Other categories	Other
62440	45.998	23.6083	1.94838	0.00399022	hypothetical protein	Hypothetical
62470	38.3767	67.3199	-1.75419	7.60982e-05	hypothetical protein	Hypothetical
62520	43.2699	119.777	-2.76814	3.03091e-13	valyl-tRNA synthetase	Other categories	Other
62530	51.7873	97.585	-1.88434	4.72479e-06	isocitrate dehydrogenase (NADP+) (EC 1.1.1.42)	Energy metabolism	TCA cycle
62570	154.416	233.329	-1.51104	0.00285927	transcriptional regulator	Regulatory functions
62580	6.80443	3.45975	1.96674	0.00105414	serine/threonine protein kinase	Regulatory functions
62660	182.87	300.934	-1.64562	0.000305019	putative phosphoribosylaminoimidazole carboxylase catalytic subunit	Other categories	Other
62700	62.5567	195.487	-3.12496	2.22045e-16	trigger factor	Cellular processes	Protein and peptide secretion
62740	320.951	199.811	1.60627	0.0211593	MazE/toxin transcriptional modulator MazF protein	Regulatory functions
62750	71.4757	37.119	1.92558	0.000648263	probable esterase	Other categories	Other
62760	46.137	189.737	-4.11247	0.00654711	hypothetical protein	Hypothetical
62770	175.606	447.636	-2.54909	1.29646e-09	hypothetical protein	Hypothetical
[truncated: 12 more rows]
