# Supplementary material for: Global Transcriptional Responses of the Toxic Cyanobacterium, Microcystis aeruginosa, to Nitrogen Stress, Phosphorus Stress, and Growth on Organic Matter
Source: PLoS One. 2013 Jul 23;8(7):e69834. doi: 10.1371/journal.pone.0069834 (PMC3720943; doi:10.1371/journal.pone.0069834)
Supplement: Table S6 — Differential expression results for the HMWDOM treatment compared to the Control treatment. (XLSX) [file pone.0069834.s010.xlsx]

## Sheet: Table S6
Table S6 Differential expression results for the HMWDOM treatment as compared to the Control treatment.
MAE Number	HWMDOM [FPKM]	Control [FPKM]	Fold Change	p-value	Gene Function	Functional Category	Sub-Category
70	171.07	91.1213	1.87739	5.44387e-05	tetratricopeptide repeat protein	Other categories	Other
90	36.5593	12.6585	2.88812	2.54815e-07	hypothetical protein	Hypothetical
180	39.885	19.4596	2.04963	0.000577606	dTDP-4-dehydrorhamnose 3,5-epimerase (EC 5.1.3.13)	Cell envelope	Surface polysaccharides, lipopolysaccharides and antigens
190	25.3352	13.6389	1.85757	0.00125711	dTDP-6-deoxy-L-mannose-dehydrogenase	Cell envelope	Surface polysaccharides, lipopolysaccharides and antigens
220	2678.43	1190.33	2.25016	2.43299e-07	hypothetical protein	Hypothetical
270	137.645	63.2271	2.17699	0.000476311	hypothetical protein	Hypothetical
680	119.442	61.8047	1.93257	3.44973e-05	hypothetical protein	Hypothetical
840	17.2923	80.6652	-4.6648	0	hypothetical protein	Hypothetical
880	70.4913	110.951	-1.57397	0.00576194	hypothetical protein	Hypothetical
940	1174.49	3230.75	-2.75077	4.66012e-10	hypothetical protein YCF65	Hypothetical
1040	221.476	119.981	1.84593	0.00114958	hypothetical protein	Hypothetical
1230	135.551	203.525	-1.50146	0.00928781	tyrosyl tRNA synthetase	Translation	Aminoacyl tRNA synthetases and tRNA modification
1240	204.83	406.447	-1.98431	0.000540476	ferredoxin-thioredoxin reductase variable subunit	Biosynthesis of cofactors, prosthetic groups, and carriers	Thioredoxin, glutaredoxin, and glutathione
1250	7.23698	2.03241	3.56079	0.00133129	hypothetical protein	Hypothetical
1310	284.353	168.324	1.68932	0.00167924	flavoprotein	Other categories	Other
1820	299.503	720.971	-2.40722	7.19018e-08	enoyl-[acyl-carrier-protein] reductase	Other categories	Other
1850	45.8087	25.4922	1.79697	0.00207844	hypothetical protein	Hypothetical
1870	11.7497	6.40985	1.83307	0.0035887	hypothetical protein	Hypothetical
1940	307.315	191.62	1.60377	0.00384233	hypothetical protein	Hypothetical
2090	745.662	265.352	2.81009	3.4105e-08	argininosuccinate synthetase	Amino acid biosynthesis	Glutamate family / Nitrogen assimilation
2130	95.4852	194.769	-2.03978	0.00232057	phosphoribosylaminoimidazole carboxylase ATPase subunit	Purines, pyrimidines, nucleosides, and nucleotides	Purine ribonucleotide biosynthesis
2140	296.608	522.859	-1.76279	0.0107826	hypothetical protein	Hypothetical
2400	36.97	17.446	2.11911	0.000153013	hypothetical protein	Hypothetical
2470	42.9045	21.324	2.01203	0.000410237	hypothetical protein	Hypothetical
2500	263.045	519.767	-1.97596	2.13332e-05	ribose 5-phosphate isomerase	Energy metabolism	Sugars
2510	675.574	1419.84	-2.10168	5.73347e-06	RNA-binding protein	Other categories	Other
2520	2064.9	142.221	14.519	0	phycobilisome degradation protein NblA	Photosynthesis and respiration	Phycobilisome
2530	29.6627	15.4605	1.91861	0.00329251	hypothetical protein	Hypothetical
2580	16646.5	26860.3	-1.61357	0.00279535	hypothetical protein	Hypothetical
2590	128.021	76.5702	1.67194	0.000942589	peptidase	Other categories	Other
2790	1621.7	2667.32	-1.64477	0.00546168	thioredoxin	Other categories	Other
2820	645.298	327.277	1.97172	2.53585e-05	RNA polymerase ECF-type sigma-E factor	Transcription	RNA synthesis, modification, and DNA transcription
2890	434.838	768.594	-1.76754	0.00337785	hypothetical protein	Hypothetical
3000	68.0814	37.0773	1.8362	0.00010661	cell envelope-related transcriptional attenuator	Regulatory functions
3020	28.0465	15.1644	1.8495	0.00515264	GCN5-related N-acetyltransferase	Other categories	Other
3050	285.654	425.92	-1.49103	0.0106744	transposase	Other categories	Transposon-related functions
3060	141.638	217.806	-1.53777	0.00577061	transposase	Other categories	Transposon-related functions
3100	19.938	5.02922	3.96443	8.12381e-10	unknown protein	Unknown
3110	53.4191	17.0924	3.12531	1.74125e-05	transcriptional regulator	Regulatory functions
3190	85.7656	55.6959	1.53989	0.00525682	mechanosensitive ion channel	Other categories	Other
3200	85.7371	37.3334	2.29653	1.66035e-07	saccharopine dehydrogenase	Other categories	Other
3210	575.819	298.689	1.92782	0.000275398	two-component sensor histidine kinase	Regulatory functions
3360	94.911	173.845	-1.83166	0.000108546	transposase	Other categories	Transposon-related functions
3400	199.993	106.761	1.87328	0.000114615	unknown protein	Unknown
3470	43.7458	23.0446	1.89831	4.25019e-05	putative calcium binding hemolysin protein	Other categories	Other
3520	24.6875	12.5565	1.96611	0.000898301	hypothetical protein	Hypothetical
3610	3.86427	2.28166	1.69362	0.00935304	tetratricopeptide repeat protein	Other categories	Other
3870	12.2376	24.4452	-1.99755	0.000253021	hypothetical protein	Hypothetical
3890	52.4815	26.4511	1.9841	8.99101e-05	hypothetical protein	Hypothetical
3970	3386.07	836.972	4.04562	8.43769e-15	hypothetical protein	Hypothetical
4000	26.1522	127.511	-4.87573	0.0032444	glycogen debranching enzyme	Other categories	Other
4050	14235.3	23640.7	-1.66071	0.00158002	50S ribosomal protein L34	Translation	Ribosomal proteins: synthesis and modification
4100	90.3191	52.4817	1.72096	0.000544777	twitching motility protein PilT	Other categories	Other
4330	134.266	44.4254	3.02228	0.000471929	hypothetical protein	Hypothetical
4510	21.4155	37.0492	-1.73002	0.00671017	urease accessory protein D	Central intermediary metabolism	Other
4520	32.6179	56.6987	-1.73827	0.000892996	isopentenyl monophosphate kinase	Other categories	Other
4590	3.16843	6.87801	-2.17079	0.0115284	glycogen phosphorylase	Central intermediary metabolism	Polysaccharides and glycoproteins
4700	228.674	87.0901	2.62572	7.67318e-09	hypothetical protein	Hypothetical
4940	75.1293	41.6387	1.80431	0.000177894	hypothetical protein	Hypothetical
5160	106.032	63.9149	1.65896	0.00516934	hypothetical protein	Hypothetical
5210	16.0617	7.91973	2.02806	0.0070833	hypothetical protein	Hypothetical
5560	167.98	69.8975	2.40323	5.4006e-07	iojap-related protein	Other categories	Other
5570	103.078	47.8201	2.15554	4.90679e-06	hypothetical protein	Hypothetical
5990	81.9716	124.224	-1.51545	0.00813629	phosphoglycerate mutase	Other categories	Other
6080	36.792	63.5096	-1.72618	0.0076699	CoA binding protein	Other categories	Other
6090	2846.75	1030.99	2.76118	0.00109016	porin type major outer membrane protein	Cell envelope	Membranes, lipoproteins, and porins
6160	198.396	123.984	1.60017	0.0037288	phosphoenolpyruvate carboxykinase	Other categories	Other
6170	7.38151	3.81447	1.93513	0.0092543	hypothetical protein	Hypothetical
6180	35.3902	15.6472	2.26176	3.26958e-05	urea transport system ATP-binding protein	Transport and binding proteins
6190	59.0182	17.6006	3.35319	3.74099e-11	urea transport system ATP-binding protein	Transport and binding proteins
6200	55.7049	19.5189	2.8539	2.66154e-10	urea transport system permease protein	Other categories	Other
6210	40.5132	13.7881	2.93827	5.97893e-10	urea transport system permease protein	Transport and binding proteins
6250	432.439	841.392	-1.94569	3.12377e-05	hypothetical protein	Hypothetical
6260	74.3801	158.981	-2.13741	2.11177e-06	glycogen synthase	Central intermediary metabolism	Polysaccharides and glycoproteins
6280	3784.78	6830.5	-1.80473	0.000347972	30S ribosomal protein S15	Translation	Ribosomal proteins: synthesis and modification
6290	378.155	1012.27	-2.67687	4.81531e-10	hypothetical protein	Hypothetical
6300	692.917	1371.33	-1.97907	0.000240391	carboxysome formation protein CcmA	Photosynthesis and respiration	CO2 fixation
6350	126.141	68.1347	1.85135	9.49523e-05	HAD-superfamily hydrolase subfamily IIB	Other categories	Other
6360	150.026	86.8368	1.72768	0.000490181	carboxymethylenebutenolidase	Other categories	Other
6430	565.881	292.661	1.93357	3.11509e-05	hypothetical protein	Hypothetical
6690	11.4485	29.8117	-2.60398	7.02486e-07	tRNA(Ile)-lysidine synthase	Other categories	Other
6700	112.042	319.769	-2.85401	5.21405e-11	coproporphyrinogen III oxidase, aerobic (EC 1.3.3.3)	Biosynthesis of cofactors, prosthetic groups, and carriers	Cobalamin, heme, phycobilin and porphyrin
6830	934.029	457.801	2.04025	5.51911e-06	thioredoxin M	Other categories	Other
6990	19.5531	47.1327	-2.4105	0.00215048	hypothetical protein	Hypothetical
7030	127.571	231.4	-1.81389	0.00192052	hypothetical protein	Hypothetical
7170	46.9671	92.3144	-1.96551	2.31873e-05	anthranilate phosphoribosyltransferase	Amino acid biosynthesis	Aromatic amino acid family
7260	47.9469	97.83	-2.04038	0.00574686	hypothetical protein	Hypothetical
7270	38.318	69.1083	-1.80355	0.000307642	glutathione synthetase	Biosynthesis of cofactors, prosthetic groups, and carriers	Thioredoxin, glutaredoxin, and glutathione
7310	1002.7	2021.16	-2.01572	2.17591e-05	50S ribosomal protein L9	Translation	Ribosomal proteins: synthesis and modification
7320	74.2169	117.877	-1.58828	0.00503248	hypothetical protein	Hypothetical
7560	28.8837	60.9371	-2.10974	2.41239e-06	NADH-dependent glutamate synthase large subunit	Amino acid biosynthesis	Glutamate family / Nitrogen assimilation
7600	201.082	91.9912	2.18588	0.00192542	hypothetical protein	Hypothetical
7650	226.801	98.9462	2.29216	0.00137533	hypothetical protein	Hypothetical
7730	31.7233	76.5021	-2.41154	5.70506e-08	hypothetical protein	Hypothetical
7740	109.134	238.271	-2.18329	0.000561419	hypothetical protein	Hypothetical
7750	19.7222	37.3071	-1.89163	0.000523186	hypothetical protein	Hypothetical
7860	113.152	62.8385	1.80068	0.000153228	malic enzyme	Energy metabolism	Pyruvate and acetyl-CoA metabolism
7880	105.11	53.8959	1.95024	0.00101507	unknown protein	Unknown
7920	7.23133	2.41282	2.99704	0.00847363	HEAT domain protein repeat-containing protein	Other categories	Other
7990	44.4695	81.5631	-1.83414	0.000108718	putative peptidase M	Other categories	Other
8010	1096.02	2146.59	-1.95853	3.623e-05	50S ribosomal protein L21	Translation	Ribosomal proteins: synthesis and modification
8020	3095.34	5675.18	-1.83346	0.000265974	50S ribosomal protein L27	Translation	Ribosomal proteins: synthesis and modification
8060	156.065	277.111	-1.77561	0.01034	hypothetical protein	Hypothetical
8080	117.258	407.302	-3.47355	5.32907e-15	spermine synthase	Other categories	Other
8140	182.964	72.1467	2.536	8.82654e-09	heat-inducible transcription repressor HrcA	Regulatory functions
8240	701.87	358.987	1.95514	0.000426531	hypothetical protein	Hypothetical
8250	347132	16014	21.6768	0	CAB/ELIP/HLIP superfamily protein	Other categories	Adaptations and atypical conditions
8260	54.7831	147.421	-2.69099	5.01833e-10	glutamate dehydrogenase (NADP+) (EC 1.4.1.4)	Amino acid biosynthesis	Glutamate family / Nitrogen assimilation
8270	16.0892	52.9083	-3.28844	1.19238e-13	cation-transporting P-type ATPase	Transport and binding proteins
8370	91.2827	183.236	-2.00735	0.0119137	hypothetical protein	Hypothetical
8390	239.784	363.396	-1.51551	0.00856718	hypothetical protein	Hypothetical
8410	23.8525	37.4836	-1.57147	0.00408974	glycosidase-like protein	Other categories	Other
8580	12.6883	27.1451	-2.13938	4.93972e-05	polysaccharide pyruvyl transferase	Other categories	Other
8820	62.7789	29.6293	2.11881	0.0107937	probable glutathione S-transferase	Other categories	Other
8920	72.7068	124.06	-1.70631	0.00572726	putative translation factor	Other categories	Other
9030	47.9802	29.5186	1.62542	0.00469072	hypothetical protein	Hypothetical
9040	120.28	69.3143	1.73528	0.000393235	putative carotenoid oxygenase	Other categories	Other
9050	348.118	61.5447	5.65634	0	glutamate--ammonia ligase	Amino acid biosynthesis	Glutamate family / Nitrogen assimilation
9060	5630.85	741.435	7.59453	0	unknown protein	Unknown
9100	310.336	190.132	1.63221	0.0107985	hypothetical protein	Hypothetical
9190	159.399	66.8304	2.38513	2.58992e-08	biopterin transport-related protein BT1 homolog	Other categories	Other
9270	10.2631	4.99845	2.05326	0.00500733	phosphate transport system permease protein	Transport and binding proteins
9380	40.6856	20.8975	1.94691	0.000109082	transcriptional regulator	Regulatory functions
9570	18.0171	34.3755	-1.90794	0.000134424	UDP-N-acetylmuramoylalanine--D-glutamate ligase	Cell envelope	Murein sacculus and peptidoglycan
9580	99.3755	41.0389	2.4215	2.53336e-08	hypothetical protein	Hypothetical
9640	425.19	1018.23	-2.39476	1.80966e-07	hypothetical protein	Hypothetical
9660	18.4978	31.0606	-1.67915	0.0110337	methyltransferase	Other categories	Other
9690	24.4197	40.9715	-1.67781	0.00396849	hypothetical protein	Hypothetical
9700	795.614	1891.69	-2.37765	6.55198e-06	ketol-acid reductoisomerase	Amino acid biosynthesis	Branched chain family
9710	29.0177	14.4375	2.00988	9.30808e-05	type IV pilus assembly protein PilM	Cellular processes	Chemotaxis
10010	42.3183	25.4308	1.66406	0.00168053	porin type major outer membrane protein	Cell envelope	Membranes, lipoproteins, and porins
10050	98.6805	148.536	-1.50522	0.0115222	hypothetical protein	Hypothetical
10180	42.6193	66.426	-1.55859	0.00573475	transposase	Other categories	Transposon-related functions
10220	5233.67	2291.94	2.28351	0.00816394	photosystem II D1 protein	Photosynthesis and respiration	Photosystem II
10240	38096.1	79862.1	-2.09633	0.000314042	phycobilisome small core linker polypeptide	Photosynthesis and respiration	Phycobilisome
10260	13394.7	36577.3	-2.73073	0.00177883	allophycocyanin beta subunit	Photosynthesis and respiration	Phycobilisome
10270	10432.9	27450.1	-2.63111	0.0013465	allophycocyanin alpha subunit	Photosynthesis and respiration	Phycobilisome
10290	1171.57	383.447	3.05536	6.25486e-09	putative peptidase	Other categories	Other
10300	81.7853	51.9232	1.57512	0.00371217	periplasmic polyamine-binding protein	Transport and binding proteins
10330	381.977	589.812	-1.5441	0.00615946	hypothetical protein	Hypothetical
10380	3683.89	1154.8	3.19007	3.33857e-05	photosystem II D1 protein	Photosynthesis and respiration	Photosystem II
10410	349.285	213.166	1.63856	0.0106409	photosystem II D1 protein	Photosynthesis and respiration	Photosystem II
10800	5232.02	2290.7	2.28403	0.00813744	photosystem II D1 protein	Photosynthesis and respiration	Photosystem II
11070	131.784	277.031	-2.10216	0.000154862	hypothetical protein	Hypothetical
11250	175.2	78.2429	2.23918	2.92251e-07	6-phosphogluconolactonase	Energy metabolism	Pentose phosphate pathway
11260	55.196	16.2839	3.38961	5.36279e-10	FHA domain containing protein	Other categories	Other
11280	234.197	132.284	1.77041	0.00278794	serine/threonine protein phosphatase	Regulatory functions
11310	481.843	1399.28	-2.90402	1.9482e-11	30S ribosomal protein S6	Translation	Ribosomal proteins: synthesis and modification
11320	189.872	482.157	-2.53938	3.25744e-09	hypothetical protein	Hypothetical
11350	129.796	341.668	-2.63235	7.77128e-10	hypothetical protein	Hypothetical
11390	1131.26	3972.92	-3.51194	1.97636e-09	unknown protein	Unknown
11400	92.0705	194.14	-2.1086	2.7747e-06	hypothetical protein	Hypothetical
11440	16548.7	6503.94	2.54441	0.000397414	16.6 kDa small heat shock protein	Cellular processes	Chaperones
11880	520.748	331.511	1.57083	0.00353422	hypothetical protein	Hypothetical
11900	26419.2	47457.7	-1.79633	0.000250842	photosystem II PsbK protein	Photosynthesis and respiration	Photosystem II
11910	115.36	227.795	-1.97464	2.59094e-05	pentapeptide repeat family protein	Other categories	Other
11930	66.5784	111.328	-1.67213	0.00729555	transcriptional regulator	Regulatory functions
11940	48.402	29.4356	1.64434	0.00264417	hypothetical protein	Hypothetical
12070	19.8239	38.6053	-1.94741	0.00099175	hypothetical protein	Hypothetical
12100	96.9268	56.3134	1.7212	0.000801174	probable oxidoreductase	Fatty acid, phospholipid and sterol metabolism
12190	178.63	354.448	-1.98426	0.000412093	magnesium protoporphyrin IX chelatase subunit H	Biosynthesis of cofactors, prosthetic groups, and carriers	Cobalamin, heme, phycobilin and porphyrin
12330	49.2029	93.4793	-1.89987	6.35651e-05	cobalamin synthesis protein cobW homolog	Biosynthesis of cofactors, prosthetic groups, and carriers	Cobalamin, heme, phycobilin and porphyrin
12340	530.22	266.478	1.98973	0.00472447	unknown protein	Unknown
12350	99.9012	25.0413	3.98946	0	polysaccharide biosynthesis protein CapD homolog	Other categories	Other
12470	19.3471	31.7998	-1.64365	0.00598363	ribosomal protein S6 modification protein	Translation	Ribosomal proteins: synthesis and modification
12550	75.9307	116.691	-1.53681	0.00596841	hypothetical protein	Hypothetical
12580	58.6779	36.0115	1.62942	0.00332845	hypothetical protein	Hypothetical
12600	29.7237	19.4647	1.52706	0.00853834	hypothetical protein	Hypothetical
12690	245.031	135.316	1.81081	0.000140831	phosphoadenosine phosphosulfate reductase	Amino acid biosynthesis	Serine family / Sulfur assimilation
12920	264.596	503.435	-1.90266	6.43779e-05	phytoene synthase	Other categories	Other
13040	100.247	58.927	1.70121	0.00130964	probable peptidase	Other categories	Other
13130	44.6603	21.9796	2.0319	1.02153e-05	putative methyltransferase	Other categories	Other
13150	27.551	12.2524	2.24862	0.00802839	hypothetical protein	Hypothetical
13250	137.027	91.463	1.49817	0.00916608	aminopeptidase P	Translation	Degradation of proteins, peptides, and glycopeptides
13260	26.9208	13.6177	1.9769	0.00318462	hypothetical protein	Hypothetical
13270	19.7426	8.74222	2.25831	0.00275461	hypothetical protein	Hypothetical
13280	15.5293	8.13088	1.90992	0.000211719	DNA ligase	DNA replication, restriction, modification, recombination, and repair
13360	38.6004	68.8921	-1.78475	0.000945353	phosphoglycerate mutase	Other categories	Other
13500	5.59586	1.84552	3.03213	0.00804991	DNA methyltransferase	DNA replication, restriction, modification, recombination, and repair
13540	365.54	174.312	2.09704	0.00172042	hypothetical protein	Hypothetical
13630	48.4736	32.134	1.50848	0.0108665	monocomponent sodium-dependent glutamate permease GltS	Transport and binding proteins
13710	28.9181	66.4191	-2.2968	4.40297e-05	abortive infection protein	Other categories	Other
13930	6.35874	14.0477	-2.2092	0.0016773	cysteine synthase	Other categories	Other
14170	8.94675	4.72264	1.89444	0.00549495	hypothetical protein	Hypothetical
14180	20.8938	32.3231	-1.54702	0.0101254	dihydroorotase	Purines, pyrimidines, nucleosides, and nucleotides	Pyrimidine ribonucleotide biosynthesis
14260	78.1439	42.8784	1.82245	0.000489251	hypothetical protein	Hypothetical
14280	117.239	237.921	-2.02937	7.90289e-06	phycocyanin alpha phycocyanobilin lyase related protein	Photosynthesis and respiration	Phycobilisome
14360	157.888	376.322	-2.38347	4.65648e-08	YhbC family protein	Other categories	Other
14380	117.672	69.6077	1.6905	0.000897562	two-component response regulator OmpR subfamily	Regulatory functions
14440	82.0755	138.248	-1.6844	0.000858899	hypothetical protein	Hypothetical
14490	364.983	570.643	-1.56348	0.00519486	ferredoxin	Photosynthesis and respiration	Soluble electron carriers
14660	20.8702	39.9989	-1.91656	0.000201934	ABC-transporter ATP-binding protein	Transport and binding proteins
14760	227.308	87.2304	2.60583	1.88687e-09	hypothetical protein	Hypothetical
14770	655.815	104.944	6.24919	0	nitrate/nitrite transport system ATP-binding protein	Transport and binding proteins
14780	1088.44	85.0151	12.8029	0	nitrate/nitrite transport system ATP-binding protein	Transport and binding proteins
14790	1392.45	78.6714	17.6996	0	nitrate/nitrite transport system permease protein	Transport and binding proteins
14800	2609.92	179.552	14.5357	0	nitrate transport protein nrtA	Transport and binding proteins
14810	64258.9	3933.53	16.3362	0	unknown protein	Unknown
14830	90.9185	183.074	-2.01361	7.33017e-06	cysteine desulfurase	Amino acid biosynthesis	Glutamate family / Nitrogen assimilation
14840	626.025	3659.14	-5.84504	0	hypothetical protein	Hypothetical
14860	54.1137	86.5361	-1.59915	0.00329248	putative transcripton factor for heterocyst differentiation DevT	Regulatory functions
14890	47.2992	86.7075	-1.83317	0.000197622	GTPase family protein	Other categories	Other
14900	41.1784	87.838	-2.13311	1.67492e-06	NADH-dependent glutamate synthase small subunit	Amino acid biosynthesis	Glutamate family / Nitrogen assimilation
14930	2052.45	3598.45	-1.75325	0.00705946	heme oxygenase	Biosynthesis of cofactors, prosthetic groups, and carriers	Cobalamin, heme, phycobilin and porphyrin
14950	145.15	343.699	-2.36789	2.42616e-05	acyl carrier protein	Fatty acid, phospholipid and sterol metabolism
14960	138.529	321.336	-2.31963	1.62962e-07	3-oxoacyl-[acyl-carrier-protein] synthase II	Fatty acid, phospholipid and sterol metabolism
14970	188.776	293.107	-1.55267	0.00943837	transketolase	Energy metabolism	Pentose phosphate pathway
15090	62.3794	28.1765	2.21388	5.01258e-06	hypothetical protein	Hypothetical
15130	664.483	1087.42	-1.63649	0.00398386	periplasmic beta-type carbonic anhydrase	Photosynthesis and respiration	CO2 fixation
15220	50.5533	96.9643	-1.91806	3.86366e-05	6-phosphogluconate dehydrogenase	Energy metabolism	Pentose phosphate pathway
15230	217.186	76.6326	2.83412	2.70199e-11	hypothetical protein	Hypothetical
15320	12383.2	1147.73	10.7893	0	unknown protein	Unknown
15370	34.7703	76.3205	-2.19499	1.11156e-06	3-phosphoshikimate 1-carboxyvinyltransferase	Other categories	Other
15610	201.316	129.327	1.55664	0.00474089	unknown protein	Unknown
15620	52.0849	22.5716	2.30754	3.53162e-07	hypothetical protein	Hypothetical
15680	516.24	815.042	-1.5788	0.00395406	hypothetical protein	Hypothetical
15720	351.878	205.415	1.71301	0.00115973	N-acetylornithine aminotransferase	Other categories	Other
15750	31.2267	16.7274	1.8668	0.000503611	hypothetical protein	Hypothetical
15780	59.4071	36.5353	1.62602	0.00222141	twitching mobility protein	Cellular processes	Chemotaxis
15790	43.269	88.5435	-2.04635	6.64491e-05	circadian clock protein KaiB homolog	Other categories	Other
15810	21.3315	38.7083	-1.81461	0.000496165	carboxypeptidase A2 precursor	Other categories	Other
15850	17.5271	43.8824	-2.50369	1.45323e-06	glutathione S-transferase	Biosynthesis of cofactors, prosthetic groups, and carriers	Thioredoxin, glutaredoxin, and glutathione
15900	119.135	179.131	-1.5036	0.00949236	two-component response regulator OmpR subfamily	Regulatory functions
15950	211.681	115.764	1.82856	0.000267339	heat shock protein 70	Cellular processes	Chaperones
15960	73.4196	30.5798	2.40092	1.13865e-07	heat shock protein 40	Cellular processes	Chaperones
15970	61.3599	26.479	2.3173	2.27815e-07	dihydroorotate dehydrogenase	Purines, pyrimidines, nucleosides, and nucleotides	Pyrimidine ribonucleotide biosynthesis
16000	95.5847	212.241	-2.22045	6.15792e-07	2-phosphosulfolactate phosphatase	Other categories	Other
16230	892.685	3027.35	-3.39129	8.15217e-10	light-independent protochlorophyllide reductase iron protein subunit ChlL	Other categories	Other
16240	476.574	1429.23	-2.99897	3.86794e-10	hypothetical protein	Hypothetical
16250	447.674	1085.55	-2.42487	2.76742e-06	light-independent protochlorophyllide reductase subunit ChlN	Biosynthesis of cofactors, prosthetic groups, and carriers	Cobalamin, heme, phycobilin and porphyrin
16710	80.0392	135.922	-1.69819	0.000726014	biotin carboxylase	Fatty acid, phospholipid and sterol metabolism
16790	15.0201	27.2384	-1.81346	0.000733958	competence-damage inducible protein CinA homolog	Cellular processes	Transformation
16860	56.8741	96.6137	-1.69873	0.00097349	asparaginase	Energy metabolism	Amino acids and amines
16920	49.6704	149.465	-3.00914	1.42133e-09	superoxide dismutase	Cellular processes	Detoxification
16940	50.9793	93.9805	-1.8435	0.00014221	homoserine kinase	Amino acid biosynthesis	Aspartate family
17050	923.907	458.557	2.01481	1.19085e-05	hypothetical protein	Hypothetical
17060	528.551	187.273	2.82236	2.12445e-09	threonine synthase	Amino acid biosynthesis	Aspartate family
17140	54.9469	97.6977	-1.77804	0.000240846	transposase	Other categories	Transposon-related functions
17200	113.327	56.0852	2.02062	5.83433e-06	hypothetical protein	Hypothetical
17290	498.733	922.592	-1.84987	0.00205075	ferredoxin-sulfite reductase	Amino acid biosynthesis	Serine family / Sulfur assimilation
17310	244.936	98.4378	2.48823	6.26868e-09	peptide methionine sulfoxide reductase	Translation	Protein modification and translation factors
17440	166.619	39.5965	4.20792	0	competence protein ComM homolog	Cellular processes	Transformation
17450	60.9999	19.4747	3.13226	3.70148e-12	hypothetical protein	Hypothetical
17500	63.4468	40.1159	1.58159	0.00581607	ABC-2 type transport system permease protein	Transport and binding proteins
17560	68.7496	119.851	-1.7433	0.00060447	two component transcriptional regulator	Regulatory functions
17590	23.1226	10.0774	2.2945	5.79205e-07	phosphoenolpyruvate synthase	Other categories	Other
17700	44.0141	23.9754	1.8358	0.000196231	hypothetical protein	Hypothetical
17710	11.6867	20.0336	-1.71422	0.00381611	transposase	Other categories	Transposon-related functions
17720	81.027	23.7074	3.41779	7.42939e-12	lipoate-protein ligase B	Biosynthesis of cofactors, prosthetic groups, and carriers	Lipoate
17740	101.322	64.1517	1.57941	0.00330916	band 7 protein	Other categories	Other
17760	217.174	121.073	1.79374	0.000226259	hypothetical protein	Hypothetical
17770	76.6879	43.1818	1.77593	0.00027052	glycosyl transferase group 1	Other categories	Other
18110	23.481	15.1094	1.55407	0.00527504	DNA polymerase I	DNA replication, restriction, modification, recombination, and repair
18140	104.345	67.6186	1.54314	0.00656156	dTDP-glucose 4,6-dehydratase	Cell envelope	Surface polysaccharides, lipopolysaccharides and antigens
18150	136.719	79.4706	1.72037	0.000529966	UDP-glucose dehydrogenase	Energy metabolism	Sugars
18220	100.154	64.3149	1.55724	0.00553339	hypothetical protein	Hypothetical
18230	360.565	196.965	1.8306	0.000128043	hypothetical protein	Hypothetical
18290	21.6423	38.8709	-1.79606	0.00111481	phosphate transport system permease protein	Transport and binding proteins
18300	42.8061	79.0293	-1.84622	0.000171988	phosphate transport system permease protein	Transport and binding proteins
18310	15.9206	26.3615	-1.65581	0.00650265	phosphate-binding periplasmic protein	Transport and binding proteins
18360	33.1177	66.1806	-1.99835	3.32536e-05	phosphate transport system permease protein	Transport and binding proteins
18370	69.5791	165.1	-2.37284	4.90054e-08	phosphate transport system permease protein PstC homolog	Transport and binding proteins
18410	2591.15	159.653	16.2299	0	ferredoxin--nitrite reductase	Amino acid biosynthesis	Glutamate family / Nitrogen assimilation
18430	149.339	94.4779	1.58068	0.00380918	probable ATP-dependent protease	Translation	Degradation of proteins, peptides, and glycopeptides
18490	111.196	22.2833	4.9901	0	hypothetical protein	Hypothetical
18590	214.306	7372.33	-34.401	0	hypothetical protein	Hypothetical
18630	46.4098	103.789	-2.23636	4.40913e-07	hypothetical protein	Hypothetical
18720	178.955	105.692	1.69317	0.0122455	hypothetical protein	Hypothetical
18740	33.0802	15.8475	2.08741	0.000239736	hypothetical protein	Hypothetical
18750	81.6059	36.6908	2.22415	1.09269e-05	regulatory protein CII	Other categories	Other
18770	207.851	115.243	1.80359	0.000260302	hypothetical protein	Hypothetical
18870	105.168	63.4913	1.65642	0.002296	putative hydrogenase expression/formation protein HypB	Other categories	Hydrogenase
18880	96.9859	30.718	3.1573	1.04738e-12	ABC-transporter substrate-binding protein	Transport and binding proteins
18890	45.9699	12.9211	3.55774	2.56561e-11	ABC-transporter permease protein	Transport and binding proteins
18900	25.3707	8.09838	3.13281	6.23603e-07	ABC-transporter ATP-binding protein	Transport and binding proteins
18910	1718.93	3294.93	-1.91685	0.00369224	water-soluble carotenoid protein	Other categories	Other
18930	298.643	447.171	-1.49734	0.00979034	hypothetical protein	Hypothetical
19000	136.015	89.7491	1.5155	0.00779774	hypothetical protein	Hypothetical
19140	773.582	315.651	2.45075	2.82123e-08	hypothetical protein	Hypothetical
19290	144.093	95.8688	1.50302	0.00905239	protease	Other categories	Other
19330	63.7864	27.4725	2.32183	0.000501471	peptidase M48	Other categories	Other
19360	159.401	39.4606	4.0395	8.54934e-08	hypothetical protein	Hypothetical
19370	63.5887	133.411	-2.09803	3.17081e-06	transcriptional regulator	Regulatory functions
19460	32.8234	63.3614	-1.93037	8.04367e-05	malonyl coenzyme A-acyl carrier protein transacylase	Fatty acid, phospholipid and sterol metabolism
19470	61.2992	118.17	-1.92776	5.2775e-05	3-oxoacyl-[acyl-carrier-protein] synthase III	Fatty acid, phospholipid and sterol metabolism
19600	360.542	822.711	-2.28187	2.38015e-07	50S ribosomal protein L25	Translation	Ribosomal proteins: synthesis and modification
19610	576.499	1274.72	-2.21114	3.95847e-05	adenylosuccinate synthetase	Purines, pyrimidines, nucleosides, and nucleotides	Purine ribonucleotide biosynthesis
19620	8799.99	4804.92	1.83145	0.000135239	hypothetical protein	Hypothetical
19680	117.619	71.3384	1.64875	0.00137225	heat shock protein 40	Cellular processes	Chaperones
19710	119.009	185.103	-1.55537	0.00442285	hypothetical protein	Hypothetical
19750	89.6284	52.3239	1.71295	0.00120344	two-component response regulator	Regulatory functions
20050	105.384	49.5802	2.12553	1.21377e-05	hypothetical protein	Hypothetical
20210	26.7344	68.8624	-2.5758	2.56359e-05	hypothetical protein	Hypothetical
20220	16.9128	73.5077	-4.34628	8.64233e-10	hypothetical protein	Hypothetical
20330	13.2569	25.5598	-1.92804	0.000824253	transposase	Other categories	Transposon-related functions
20360	146.329	71.9678	2.03326	0.00325833	hypothetical protein	Hypothetical
20370	580.067	351.028	1.65248	0.00626318	hypothetical protein	Hypothetical
20800	21.6299	33.6806	-1.55713	0.00447021	transcription-repair coupling factor	DNA replication, restriction, modification, recombination, and repair
20830	107.912	71.9037	1.50079	0.00896577	peptidase M16-like	Other categories	Other
20980	42.1238	78.9112	-1.87332	0.000167294	tryptophan synthase alpha chain	Amino acid biosynthesis	Aromatic amino acid family
21110	17.0598	33.1834	-1.94512	0.000189996	ABC-transporter permease protein	Transport and binding proteins
21130	538.023	978.547	-1.81878	0.00017968	hypothetical protein	Hypothetical
21270	727.893	303.903	2.39515	0.00773929	unknown protein	Unknown
21290	11.4359	4.30571	2.65598	1.33188e-08	hypothetical protein	Hypothetical
21380	83.4285	45.8706	1.81878	0.000176762	5-methyltetrahydrofolate--homocysteine methyltransferase	Amino acid biosynthesis	Aspartate family
21600	17728.6	5167.78	3.4306	1.5932e-09	hypothetical protein	Hypothetical
21620	45.9524	26.6122	1.72674	0.00665071	hypothetical protein	Hypothetical
21640	972.49	2430.84	-2.4996	1.44745e-07	phycobilisome core component	Photosynthesis and respiration	Phycobilisome
21650	14.1094	30.9423	-2.19303	1.24589e-05	glutamate 5-kinase	Other categories	Other
21660	8.60153	16.4333	-1.91051	0.000245204	single-strand-DNA-specific exonuclease RecJ	Other categories	Other
21670	101.846	239.198	-2.34862	1.01536e-05	hypothetical protein	Hypothetical
21680	91.5798	208.184	-2.27325	0.00233127	hypothetical protein	Hypothetical
21700	82.8875	134.885	-1.62733	0.00244915	hypothetical protein	Hypothetical
21740	22.9586	39.3342	-1.71327	0.00340214	UDP-N-acetylglucosamine--N-acetylmuramyl-(pentapeptide) pyrophosphoryl-undecaprenol N-acetylglucosamine transferase (EC 2.4.1.227)	Cell envelope	Murein sacculus and peptidoglycan
21870	78.98	39.3497	2.00713	9.63457e-06	type 2 NADH dehydrogenase	Other categories	Other
21960	329.575	160.591	2.05226	4.68494e-06	ABC-2 type transport system permease protein	Transport and binding proteins
21980	101.8	50.6604	2.00946	0.00179604	hypothetical protein	Hypothetical
22000	1672.76	2691.75	-1.60917	0.00294387	hypothetical protein	Hypothetical
22010	154.943	256.526	-1.65562	0.00133371	anion-transporting ATPase	Other categories	Other
22020	105.652	162.404	-1.53716	0.00589599	chlorophyll a synthase (EC 2.5.1.62)	Biosynthesis of cofactors, prosthetic groups, and carriers	Cobalamin, heme, phycobilin and porphyrin
22030	657.545	319.51	2.05798	9.46824e-06	hypothetical protein	Hypothetical
22040	7039.9	4370.75	1.61068	0.00275921	CAB/ELIP/HLIP-related protein	Other categories	Other
22160	140.989	299.238	-2.12242	1.57792e-06	two-component response regulator OmpR subfamily	Regulatory functions
22170	18.1569	32.7356	-1.80293	0.00379694	hypothetical protein	Hypothetical
22490	173.892	77.0718	2.25623	5.09404e-06	hypothetical protein	Hypothetical
22570	125.305	52.9261	2.36755	3.64336e-08	cytochrome P450	Other categories	Other
22650	279.775	154.662	1.80894	0.000978973	unknown protein	Unknown
22700	187.067	57.197	3.27057	0.00334985	hypothetical protein	Hypothetical
22770	186.206	63.7732	2.91982	1.70199e-11	hypothetical protein	Hypothetical
22790	1011.01	162.991	6.20286	3.06133e-12	unknown protein	Unknown
22800	65.4382	15.7383	4.1579	0.00566243	serine/threonine kinase	Regulatory functions
22870	288.507	811.608	-2.81313	0.000344979	unknown protein	Unknown
22940	132.473	76.3143	1.73589	0.000473428	cytochrome c oxidase subunit I	Photosynthesis and respiration	Respiratory terminal oxidases
22960	640.964	283.855	2.25807	0.0044111	hypothetical protein	Hypothetical
22970	129.465	58.7996	2.2018	4.92777e-05	isovaleryl-CoA dehydrogenase	Other categories	Other
23180	18.2669	29.3976	-1.60934	0.00501342	UDP-N-acetylmuramoylalanyl-D-glutamyl-2 6-diaminopimelate--D-alanyl-D-alanine ligase	Other categories	Other
23210	156.242	254.298	-1.62759	0.00196083	hypothetical protein	Hypothetical
23230	235.423	354.986	-1.50786	0.00822084	N utilization substance protein B homolog	Transcription	RNA synthesis, modification, and DNA transcription
23250	259.927	413.229	-1.58979	0.00360066	lactoylglutathione lyase	Other categories	Other
23300	5550.58	12453.3	-2.2436	0.000264018	photosystem I subunit II	Photosynthesis and respiration	Photosystem I
23360	18.6941	9.15222	2.04258	0.00331326	hypothetical protein	Hypothetical
23530	12.0706	478.037	-39.6034	0	unknown protein	Unknown
23600	798.966	1473.73	-1.84455	0.00129912	ribose-phosphate pyrophosphokinase	Purines, pyrimidines, nucleosides, and nucleotides	Purine ribonucleotide biosynthesis
23870	41.1325	74.1435	-1.80255	0.000406477	hypothetical protein	Hypothetical
23880	50.345	101.548	-2.01704	7.2385e-06	protein conferring resistance to acetazolamide Zam	Other categories	Drug and analog sensitivity
23910	947.809	1501.25	-1.58392	0.00344149	hypothetical protein	Hypothetical
23920	432.367	943.577	-2.18235	1.11619e-06	hypothetical protein	Hypothetical
23950	58.0132	22.3035	2.60108	1.16742e-09	hypothetical protein	Hypothetical
24040	271.349	153.42	1.76867	0.000261453	hypothetical protein	Hypothetical
24050	105.056	52.7066	1.99322	1.25268e-05	hypothetical protein	Hypothetical
24060	755.067	378.814	1.99324	3.55666e-05	hypothetical protein	Hypothetical
24110	16464.7	9269.16	1.77629	0.000273123	unknown protein	Unknown
24410	147.288	78.9892	1.86466	6.52763e-05	N-acetylglutamate kinase	Amino acid biosynthesis	Glutamate family / Nitrogen assimilation
24440	83758.2	256609	-3.06369	1.98022e-06	unknown protein	Unknown
24450	15698.9	53189.1	-3.38808	0.001034	phycocyanin beta subunit	Photosynthesis and respiration	Phycobilisome
24460	17411.8	65938.6	-3.78701	0.000409739	phycocyanin alpha subunit	Photosynthesis and respiration	Phycobilisome
24480	747.49	1786.14	-2.38952	1.07597e-05	phycobilisome rod linker polypeptide	Photosynthesis and respiration	Phycobilisome
24500	42.2032	21.0101	2.00871	0.000126551	hypothetical protein	Hypothetical
25010	57.053	89.7478	-1.57306	0.0041875	pleiotropic regulatory protein homolog	Other categories	Other
25020	292.244	481.159	-1.64643	0.00171559	hypothetical protein	Hypothetical
25030	1078.79	2252.31	-2.08781	0.000361012	NAD(P)-dependent glyceraldehyde-3-phosphate dehydrogenase	Photosynthesis and respiration	CO2 fixation
25120	13308.9	24817.4	-1.86472	6.7364e-05	unknown protein	Unknown
25130	22.3702	34.6971	-1.55104	0.00733725	extracellular solute-binding protein	Transport and binding proteins
25140	17.1258	32.1556	-1.87761	0.00054387	ABC-transporter permease protein	Transport and binding proteins
25160	27.6999	47.4989	-1.71477	0.00260137	putative c-type cytochrome biogenesis protein CcdA	Other categories	Other
25170	30.6923	48.0839	-1.56664	0.00552499	c-type cytochrome biogenesis protein Ccs1	Other categories	Other
25240	9999.51	2504.95	3.9919	8.88178e-16	hypothetical protein	Hypothetical
25250	208.093	122.148	1.70361	0.00187995	unknown protein	Unknown
25320	18.2945	32.7366	-1.78942	0.000809674	cation transporter	Transport and binding proteins
25360	190.909	108.849	1.75389	0.000307304	hypothetical protein	Hypothetical
25370	4172.61	2721.4	1.53326	0.0106877	hypothetical protein	Hypothetical
25410	32.4519	61.8773	-1.90674	0.000206314	hypothetical protein YCF53	Hypothetical
25420	52.7844	98.843	-1.87258	9.13586e-05	conserved hypothetical protein	Other categories	Other
25450	169.369	506.065	-2.98794	4.74065e-12	hypothetical protein	Hypothetical
25460	2214.59	3899.07	-1.76063	0.000409797	hypothetical protein	Hypothetical
25670	4.51769	1.58611	2.84828	0.000710635	hypothetical protein	Hypothetical
25720	55.2451	24.9508	2.21416	5.49103e-07	deoxyribodipyrimidine photolyase-related protein	Other categories	Other
25730	1154.65	405.48	2.84761	0.000227531	unknown protein	Unknown
25740	84.8497	54.3119	1.56227	0.00439481	hypothetical protein	Hypothetical
25850	13.5399	29.6355	-2.18875	3.60085e-05	amino acid ABC-transporter permease protein	Transport and binding proteins
25950	282.956	98.2753	2.87922	1.20882e-09	ATP-dependent Clp protease ATPase subunit	Translation	Degradation of proteins, peptides, and glycopeptides
26010	14.5596	8.61017	1.69098	0.0120424	allergen V5/Tpx-1 related protein	Other categories	Other
26040	228.801	151.298	1.51225	0.00764906	hypothetical protein	Hypothetical
26160	12.5502	21.324	-1.6991	0.00578301	hypothetical protein	Hypothetical
26330	707.275	6074.91	-8.58918	0	hypothetical protein	Hypothetical
26410	60.2282	23.6893	2.54242	8.39169e-08	cell division protein FtsQ	Cellular processes	Cell division
26430	33.706	60.2915	-1.78875	0.000644883	phosphomethylpyrimidine kinase	Other categories	Other
26620	20.7288	5.81329	3.56576	1.7609e-07	unknown protein	Unknown
26630	26.6303	7.63385	3.48845	0.00781855	unknown protein	Unknown
26720	4.78863	2.28097	2.09938	0.0029173	tetratricopeptide protein	Other categories	Other
26730	108.608	16.5187	6.57485	8.63754e-14	hypothetical protein	Hypothetical
26770	81.5804	35.3342	2.30882	1.00168e-06	hypothetical protein	Hypothetical
26780	187.276	285.35	-1.52369	0.0101042	lysyl-tRNA synthetase	Other categories	Other
26790	80068.9	4545.35	17.6156	8.83358e-11	hypothetical protein	Hypothetical
26800	1383.7	425.544	3.2516	6.55501e-07	AAA famiry ATPase central region	Other categories	Other
26810	4726.79	2276.45	2.07639	0.000126448	hypothetical protein	Hypothetical
26850	25.9519	13.5227	1.91914	0.000169546	amino-acid ABC-transporter permease protein	Transport and binding proteins
27170	109.521	182.347	-1.66495	0.00129653	hypothetical protein	Hypothetical
27270	2423.41	8152.53	-3.36407	3.95683e-13	30S ribosomal protein S21	Translation	Ribosomal proteins: synthesis and modification
27290	62.9256	122.058	-1.93972	2.56146e-05	NADH dehydrogenase subunit 5 NdhF4	Photosynthesis and respiration	NADH dehydrogenase
27310	67.342	30.3255	2.22064	4.3336e-06	hypothetical protein	Hypothetical
27450	138.673	211.981	-1.52864	0.00628012	cyanophycinase	Other categories	Adaptations and atypical conditions
27570	158.058	77.7203	2.03368	0.00108347	hypothetical protein	Hypothetical
27960	283.02	433.039	-1.53007	0.00679603	hypothetical protein	Hypothetical
27970	14.3241	27.4351	-1.91531	0.000995588	phycocyanin alpha-subunit phycocyanobilin lyase	Photosynthesis and respiration	Phycobilisome
27990	1359.8	727.272	1.86973	0.00689066	porin type major outer membrane protein	Cell envelope	Membranes, lipoproteins, and porins
28060	25.7722	13.534	1.90426	0.000177274	hypothetical protein	Hypothetical
28080	15.6227	28.5039	-1.82452	0.00228372	hypothetical protein	Hypothetical
28090	197.341	317.981	-1.61133	0.00405731	similar to chlorobenzene dioxygenase ferredoxin component	Other categories	Other
28340	260.588	149.088	1.74788	0.00286144	hypothetical protein	Hypothetical
28380	131.883	84.7845	1.55551	0.00450099	orotate phosphoribosyltransferase	Other categories	Other
28390	1918.54	581.794	3.29763	3.61933e-14	hypothetical protein	Hypothetical
28420	121.256	274.08	-2.26034	5.03727e-06	anti-sigma f factor antagonist	Transcription	RNA synthesis, modification, and DNA transcription
28430	73.7851	184.83	-2.50498	4.91149e-09	carbamoyl-phosphate synthase small chain	Energy metabolism	Amino acids and amines
28670	56.744	155.656	-2.74313	1.56505e-10	dihydroxyacid dehydratase	Amino acid biosynthesis	Branched chain family
28890	1470.26	2435.26	-1.65635	0.00125294	unknown protein	Unknown
28940	47.2468	123.616	-2.61639	3.68033e-09	photosystem I biogenesis protein BtpA	Photosynthesis and respiration	Photosystem I
28970	77.8302	151.563	-1.94735	0.000687154	hypothetical protein	Hypothetical
29040	14.5874	23.9139	-1.63935	0.00176911	adenine specific DNA methyltransferase	Other categories	Other
29110	106.857	66.797	1.59973	0.00551272	ferredoxin-dependent glutamate synthase	Amino acid biosynthesis	Glutamate family / Nitrogen assimilation
29130	189.061	622.321	-3.29164	0.000369314	hypothetical protein	Hypothetical
29180	29.4163	10.9135	2.6954	0.000385673	CsbD-like protein	Other categories	Other
29190	569.24	193.166	2.9469	0.000152849	CsbD-like protein	Other categories	Other
29470	142.998	75.6237	1.89092	5.4879e-05	hypothetical protein	Hypothetical
29480	3416.04	2013.19	1.69683	0.00258535	unknown protein	Unknown
29510	444.191	747.311	-1.68241	0.00101364	hypothetical protein	Hypothetical
29670	22.7547	38.3609	-1.68585	0.0014747	transposase	Other categories	Transposon-related functions
29890	167.883	81.4442	2.06133	5.99726e-06	hypothetical protein	Hypothetical
30090	66.5589	220.685	-3.31563	4.95159e-14	adenylosuccinate lyase	Purines, pyrimidines, nucleosides, and nucleotides	Purine ribonucleotide biosynthesis
30210	2918.48	610.23	4.78259	0	unknown protein	Unknown
30230	190.517	61.0502	3.12066	6.67835e-07	peptidase	Other categories	Other
30290	603.276	294.22	2.05042	9.12091e-05	hypothetical protein	Hypothetical
30500	15.5665	24.627	-1.58205	0.00857473	hypothetical protein	Hypothetical
30510	454.671	222.074	2.04739	3.16494e-05	serine protease HtrA	Translation	Degradation of proteins, peptides, and glycopeptides
30600	26.3148	10.9943	2.39349	1.12987e-07	serine/threonine protein kinase	Regulatory functions
30610	2339.8	109.046	21.457	0	hypothetical protein	Hypothetical
30620	224.047	50.8617	4.40502	0	periplasmic protease HhoA	Translation	Degradation of proteins, peptides, and glycopeptides
30650	71.1635	38.0909	1.86825	0.00170905	hypothetical protein	Hypothetical
30660	53.1506	25.2257	2.107	0.00285989	hypothetical protein	Hypothetical
30710	49.6028	31.6132	1.56905	0.0068351	hypothetical protein	Hypothetical
30820	46.0298	25.7946	1.78447	0.00255429	hypothetical protein	Hypothetical
30880	215.542	510.776	-2.36973	0.000264064	unknown protein	Unknown
31170	160.849	94.7146	1.69825	0.000717417	ABC-transporter membrane fusion protein	Transport and binding proteins
31210	405.547	229.458	1.76741	0.00279496	virulence-associated protein VapB-like protein	Other categories	Other
31240	10.589	5.61919	1.88444	0.0041972	glycosyl transferase family 2	Other categories	Other
31270	49.835	24.2839	2.05218	1.16056e-05	S-layer region-like precursor	Other categories	Other
31280	29.2472	17.4002	1.68085	0.00114545	copper-transporting P-type ATPase PacS	Transport and binding proteins
31290	149.481	305.689	-2.045	8.12745e-06	uroporphyrinogen decarboxylase	Biosynthesis of cofactors, prosthetic groups, and carriers	Cobalamin, heme, phycobilin and porphyrin
31300	29.2529	44.7323	-1.52916	0.0120106	NAD-dependent epimerase/dehydratase	Other categories	Other
31310	23.7377	52.5363	-2.2132	8.62456e-07	ABC-transporter ATP-binding protein	Transport and binding proteins
31330	41.6744	90.7734	-2.17816	1.26129e-05	adenylylsulfate kinase	Amino acid biosynthesis	Serine family / Sulfur assimilation
31370	4.54295	14.5232	-3.19687	0.000711115	dephospho-CoA kinase	Other categories	Other
31380	27.6247	94.0837	-3.40578	3.95217e-12	phosphoribosyl aminoidazole succinocarboxamide synthetase	Purines, pyrimidines, nucleosides, and nucleotides	Purine ribonucleotide biosynthesis
31400	210.593	106.583	1.97586	0.000373011	hypothetical protein	Hypothetical
31510	2.4565	6.25008	-2.5443	0.00436252	sulfate transport system ATP-binding protein	Transport and binding proteins
31520	1.92042	9.17942	-4.7799	9.35865e-05	sulfate transport system permease protein	Transport and binding proteins
31530	6.87573	20.6023	-2.99638	3.0138e-06	sulfate transport system permease protein	Transport and binding proteins
31550	11.5733	19.7499	-1.70651	0.00620388	sulfate transport system substrate-binding protein	Transport and binding proteins
31570	31.4563	52.9146	-1.68216	0.00361017	ribonuclease III	Transcription	Degradation of RNA
31680	81.8836	171.279	-2.09174	0.00409768	hypothetical protein	Hypothetical
31690	33.6527	66.7845	-1.98452	1.33006e-05	ferrous iron transport protein B	Other categories	Other
31700	41.0568	95.5287	-2.32674	1.07742e-06	ferrous iron transport protein A	Other categories	Other
31750	31.295	50.0838	-1.60038	0.00312726	circadian clock protein KaiC homolog	Other categories	Other
31780	41.1228	63.7224	-1.54956	0.00595951	N-acetylornithine aminotransferase	Other categories	Other
31800	9810.84	20546.4	-2.09425	2.85469e-05	photosystem I reaction center subunit IV	Photosynthesis and respiration	Photosystem I
31880	534.742	301.04	1.77632	0.00024155	Mo-dependent nitrogenase-like	Other categories	Other
32000	2566.54	4529.03	-1.76464	0.000289953	50S ribosomal protein L28	Translation	Ribosomal proteins: synthesis and modification
32020	20.7932	12.6719	1.64089	0.00696041	amino-acid ABC-transporter permease protein	Transport and binding proteins
32030	235.456	132.762	1.77352	0.00133525	unknown protein	Unknown
32050	162.487	67.5329	2.40604	1.99484e-08	hypothetical protein	Hypothetical
32060	591.252	280.994	2.10414	0.000229769	unknown protein	Unknown
32100	333.264	163.475	2.03862	8.64127e-06	FAD dependent oxidoreductase	Other categories	Other
32110	2190.38	1167.12	1.87674	8.96156e-05	hypothetical protein	Hypothetical
32160	6053.52	13605.5	-2.24754	0.000444218	unknown protein	Unknown
32170	616.524	1484.8	-2.40834	4.47784e-05	RNA binding protein	Translation	Nucleoproteins
32180	2499.85	4247.21	-1.69899	0.00117702	hypothetical protein	Hypothetical
32210	4692.29	7579.86	-1.61539	0.00280881	photosystem II reaction center protein Z	Photosynthesis and respiration	Photosystem II
32340	11.2235	27.5125	-2.45133	2.78842e-05	similar to Zn-dependent protease precursor	Other categories	Other
32350	153.137	928.83	-6.06535	0	preprotein translocase SecG subunit	Cellular processes	Protein and peptide secretion
32430	1484.7	4011.96	-2.7022	2.40338e-07	30S ribosomal protein S4	Translation	Ribosomal proteins: synthesis and modification
32440	149.226	98.8159	1.51014	0.0115541	hypothetical protein	Hypothetical
32610	11.926	4.51185	2.64326	6.9999e-08	DNA methylase	Other categories	Other
32630	63.8475	37.1751	1.71748	0.00466092	hypothetical protein	Hypothetical
32940	169.436	63.3599	2.67418	1.66626e-09	protein-tyrosine kinase	Other categories	Other
32980	120.411	241.595	-2.00642	0.000140727	hypothetical protein	Hypothetical
33550	231.105	143.857	1.60649	0.0023274	squalene/phytoene synthase	Other categories	Other
33560	5562.32	2822.1	1.97099	0.00174868	cytochrome b6-f complex subunit 4	Photosynthesis and respiration	Cytochrome b6/f complex
33590	170.807	78.9695	2.16295	8.64599e-07	hypothetical protein	Hypothetical
33600	92.4206	36.9023	2.50447	2.66536e-07	hypothetical protein	Hypothetical
33610	30.8351	13.1793	2.33966	0.0111155	hypothetical protein	Hypothetical
33630	23.4479	11.8573	1.97751	0.00112637	hypothetical protein	Hypothetical
33700	87.8842	56.0002	1.56936	0.0122161	hypothetical protein	Hypothetical
33720	276.999	454.472	-1.6407	0.00152923	hypothetical protein	Hypothetical
33970	54.2201	97.2387	-1.79341	0.000363691	excinuclease ABC subunit A	DNA replication, restriction, modification, recombination, and repair
34140	3.02145	6.69401	-2.2155	0.0111123	transposase	Other categories	Transposon-related functions
34250	143.799	245.015	-1.70387	0.00236867	hypothetical protein	Hypothetical
34290	28.2661	47.9184	-1.69526	0.00115559	transposase	Other categories	Transposon-related functions
34460	121.979	390.109	-3.19817	6.15952e-13	ferrochelatase	Other categories	Other
34620	104.022	274.374	-2.63765	3.5029e-09	omega 3 acyl-lipid desaturase	Fatty acid, phospholipid and sterol metabolism
34630	24.7919	14.3885	1.72304	0.00286495	DNA cytosine methylase	Other categories	Other
34680	157.558	57.7037	2.73047	0.0023394	unknown protein	Unknown
34870	13.4886	23.9179	-1.77319	0.000493492	putative phosphoketolase	Other categories	Other
34890	158.938	407.143	-2.56165	4.1063e-09	glyceraldehyde 3-phosphate dehydrogenase	Photosynthesis and respiration	CO2 fixation
34970	95.5738	56.0853	1.70408	0.0032629	hypothetical protein	Hypothetical
35000	33.0105	8.07664	4.08716	6.28888e-08	hypothetical protein	Hypothetical
35010	293.068	68.0974	4.30366	0	hypothetical protein	Hypothetical
35020	443.429	110.083	4.02813	4.01901e-14	pentapeptide repeat family protein	Other categories	Other
35030	110.719	47.266	2.34247	6.74741e-05	hypothetical protein	Hypothetical
35050	116.413	42.2105	2.75792	1.17279e-10	hypothetical protein	Hypothetical
35510	51.0358	127.999	-2.50802	6.92187e-09	phenylalanyl-tRNA synthetase	Translation	Aminoacyl tRNA synthetases and tRNA modification
35590	17.1636	57.9891	-3.37861	0.000939791	hypothetical protein	Hypothetical
35660	14.8973	8.96378	1.66194	0.00448831	hypothetical protein	Hypothetical
35820	25.7108	47.4696	-1.84629	0.00018682	major facilitator superfamily protein	Other categories	Other
36020	13.5624	32.8204	-2.41996	4.78157e-05	N-(5'-phosphoribosyl)anthranilate isomerase (EC 5.3.1.24)	Amino acid biosynthesis	Aromatic amino acid family
36030	313.075	538.53	-1.72013	0.000641785	GTP cyclohydrolase I	Biosynthesis of cofactors, prosthetic groups, and carriers	Folic acid
36040	209.98	449.778	-2.142	1.8798e-06	short-chain dehydrogenase/reductase	Other categories	Other
36090	70.4856	217.981	-3.09256	2.16336e-09	hypothetical protein	Hypothetical
36100	161.404	808.319	-5.00805	2.3389e-07	hypothetical protein	Hypothetical
36110	10.3729	18.2423	-1.75865	0.00348619	probable glycosyl transferase	Other categories	Other
36120	19.3656	10.6303	1.82174	0.0013255	PxcA protein	Biosynthesis of cofactors, prosthetic groups, and carriers	Cobalamin, heme, phycobilin and porphyrin
36130	77.692	37.4516	2.07446	3.71676e-06	RND multidrug efflux transporter	Other categories	Other
36160	43.6349	28.6922	1.52079	0.00847688	eukaryotic Na+/H+ exchanger	Other categories	Other
36340	21.8606	125.082	-5.7218	0.00812833	unknown protein	Unknown
36470	30.1205	19.3094	1.55989	0.00964951	hypothetical protein	Hypothetical
36510	263.417	819.386	-3.1106	1.96643e-12	peroxiredoxin	Other categories	Other
36590	1021.91	3715.04	-3.63539	4.21885e-15	50S ribosomal protein L19	Translation	Ribosomal proteins: synthesis and modification
36610	448.931	835.478	-1.86104	0.00036326	transcription antitermination protein NusG	Regulatory functions
36620	583.46	1015.01	-1.73964	0.000429228	50S ribosomal protein L11	Translation	Ribosomal proteins: synthesis and modification
36630	208.912	564.225	-2.70078	5.23774e-10	50S ribosomal protein L1	Translation	Ribosomal proteins: synthesis and modification
36680	44.9967	67.9616	-1.51037	0.0122099	riboflavin biosynthesis protein RibF	Biosynthesis of cofactors, prosthetic groups, and carriers	Riboflavin
36700	73.2081	25.1612	2.90956	2.20053e-10	hypothetical protein	Hypothetical
36740	66.0984	44.1358	1.49761	0.0101814	integral membrane protein IctB	Other categories	Other
36750	25.9118	10.1551	2.5516	7.61664e-08	pyruvate decarboxylase isozyme 1	Other categories	Other
36860	22.7686	13.9388	1.63347	0.00568782	similar to flotillin	Other categories	Other
36870	87.5995	36.3049	2.41288	2.80909e-05	mannose-6-phosphate isomerase	Energy metabolism	Sugars
36930	14.0441	8.7328	1.6082	0.00654727	hypothetical protein	Hypothetical
37190	118.823	265.963	-2.23831	3.52499e-07	putative arsenical pump-driving ATPase	Other categories	Drug and analog sensitivity
37270	68.6581	117.589	-1.71267	0.000572904	aspartyl-tRNA synthetase	Other categories	Other
37320	796.088	401.051	1.985	0.000175224	putative HlyD family secretion protein	Other categories	Other
37330	21.0262	6.45771	3.25598	0.00478927	hypothetical protein	Hypothetical
37350	15.2571	41.24	-2.703	3.1923e-07	aldo/keto reductase	Other categories	Other
37380	203.566	118.581	1.71668	0.000485908	hypothetical protein	Hypothetical
37390	310.006	204.556	1.51551	0.00745299	probable ribosomal large subunit pseudouridine synthase B	Translation	Ribosomal proteins: synthesis and modification
37500	10.2918	5.63008	1.828	0.00247172	hypothetical protein	Hypothetical
37850	20.1814	38.9545	-1.93022	0.000124394	hypothetical protein	Hypothetical
37860	48.1037	29.69	1.6202	0.00708765	hypothetical protein	Hypothetical
37870	175.892	260.683	-1.48206	0.0114724	hypothetical protein	Hypothetical
37940	33.7634	21.7855	1.54981	0.0113104	amino acid ABC-transporter permease protein	Transport and binding proteins
37950	153.867	94.1996	1.63341	0.00259707	single-stranded DNA-binding protein	Other categories	Other
38000	47.4324	95.1543	-2.0061	1.0903e-05	Na+/H+ antiporter	Transport and binding proteins
38060	96.2706	276.171	-2.8687	0.00112888	transposase	Other categories	Transposon-related functions
38140	25.2666	46.6836	-1.84764	8.88216e-05	pyruvate-flavodoxin oxidoreductase	Photosynthesis and respiration	Soluble electron carriers
38150	30.7468	54.9724	-1.78791	0.00047672	dihydroorotate dehydrogenase	Other categories	Other
38380	591.583	318.942	1.85483	0.000124687	Tic22-like protein	Other categories	Other
38390	277.581	156.387	1.77496	0.000327012	hypothetical protein	Hypothetical
38440	42.7074	22.1065	1.93189	0.000351629	two component transcriptional regulator	Regulatory functions
38450	1322.96	2430.08	-1.83685	0.00349697	phosphoribulokinase	Photosynthesis and respiration	CO2 fixation
38500	17.5067	9.59072	1.82538	0.000835764	hypothetical protein	Hypothetical
38570	53.7106	95.1624	-1.77176	0.0011738	McyA protein	Other categories	Other
38670	113.68	171.686	-1.51026	0.00794583	DNA polymerase III beta subunit	DNA replication, restriction, modification, recombination, and repair
38700	3125.67	1748.07	1.78807	0.000935954	hypothetical protein	Hypothetical
38770	1597.17	3088.8	-1.93392	9.03064e-05	unknown protein	Unknown
38790	130.238	195.585	-1.50175	0.00940985	probable glycosyl transferase	Other categories	Drug and analog sensitivity
38850	50.2125	76.7217	-1.52794	0.00954735	septum site-determining protein MinD	Cellular processes	Cell division
39020	351.524	154.579	2.27407	1.49161e-05	glycine dehydrogenase	Energy metabolism	Amino acids and amines
39060	163.907	312.648	-1.90747	0.000139651	single-stranded DNA-binding protein	DNA replication, restriction, modification, recombination, and repair
39080	24.0337	12.18	1.97321	0.0010741	rod shape-determining protein MreC	Other categories	Other
39110	148.381	294.672	-1.98591	1.14468e-05	probable branched-chain amino acid aminotransferase	Amino acid biosynthesis	Branched chain family
39130	32.4235	64.9095	-2.00193	1.34832e-05	circadian clock protein KaiC homolog	Other categories	Other
39160	31.4821	47.8586	-1.52018	0.00717764	DNA polymerase III alpha subunit	DNA replication, restriction, modification, recombination, and repair
39170	13531.2	22102.6	-1.63345	0.00913287	unknown protein	Unknown
39270	39.6165	66.1749	-1.67039	0.00938397	diamine acetyltransferase 2	Other categories	Other
39300	251.944	136.925	1.84001	9.11815e-05	hypothetical protein	Hypothetical
39530	181.781	309.386	-1.70197	0.00193207	hypothetical protein	Hypothetical
39640	26.0482	8.11544	3.20971	1.86658e-10	ATP-dependent DNA helicase RecQ	Other categories	Other
39660	312.841	211.72	1.47762	0.0119518	putative metalloprotease	Other categories	Other
39690	2657.27	7284.52	-2.74135	2.39634e-10	hypothetical protein	Hypothetical
39700	55.2341	173.551	-3.1421	4.93161e-13	phycocyanin operon protein W	Photosynthesis and respiration	Phycobilisome
39750	304.927	192.003	1.58814	0.00443729	hypothetical protein	Hypothetical
39820	19.5329	10.0591	1.94181	0.000126891	ABC-transporter ATP-binding protein	Transport and binding proteins
39830	39.2551	20.0144	1.96134	5.91127e-05	hypothetical protein	Hypothetical
39930	45.9442	20.0104	2.29602	9.21708e-06	hypothetical protein	Hypothetical
40000	20.6468	53.4244	-2.58754	2.62904e-08	riboflavin biosynthesis protein RibD	Other categories	Other
40010	2167.16	589.295	3.67755	3.31223e-07	ammonium/methylammonium permease	Transport and binding proteins
40150	91.6342	169.079	-1.84515	0.000160315	hypothetical protein	Hypothetical
40200	90.3454	54.8545	1.647	0.00228809	hypothetical protein	Hypothetical
40260	153.756	68.9528	2.22987	9.10478e-07	mannose-1-phosphate guanyltransferase	Energy metabolism	Sugars
40290	1316.18	513.802	2.56165	7.28009e-06	hypothetical protein	Hypothetical
40400	34.1774	68.3885	-2.00099	0.00858818	hypothetical protein	Hypothetical
40520	113.674	45.0853	2.52131	3.68389e-08	hypothetical protein	Hypothetical
40530	3317.5	1147.9	2.89006	6.36966e-11	unknown protein	Unknown
40550	2845.81	6034.26	-2.1204	1.03223e-05	hypothetical protein	Hypothetical
40560	3075.27	5380.91	-1.74974	0.00286727	S-adenosylmethionine decarboxylase proenzyme	Other categories	Other
40590	292.244	188.541	1.55003	0.00461172	hypothetical protein	Hypothetical
40600	323.38	216.245	1.49543	0.00934478	hypothetical protein	Hypothetical
41100	77.5633	41.1198	1.88628	0.000575181	urease accessory protein E	Central intermediary metabolism	Other
41130	2681.62	4268.92	-1.59192	0.00393132	DNA binding protein HU	Translation	Nucleoproteins
41140	29.7219	51.8042	-1.74296	0.000768509	histidinol-phosphate aminotransferase	Other categories	Other
41220	65.9431	106.455	-1.61435	0.00302838	probable myo-inositol-1(or 4)-monophosphatase	Other categories	Other
41350	64.1751	35.5295	1.80625	0.00028768	hypothetical protein	Hypothetical
41400	140.706	251.975	-1.79079	0.000547087	transketolase, central region	Other categories	Other
41640	10.0465	20.1549	-2.00616	0.00018404	hypothetical protein	Hypothetical
41750	90.1025	23.5269	3.82977	2.97444e-07	hypothetical protein	Hypothetical
41780	40.4652	25.9129	1.56159	0.0107475	hypothetical protein	Hypothetical
41870	1305.18	548.639	2.37894	2.9934e-07	hypothetical protein	Hypothetical
42020	80.4221	37.6724	2.13478	2.38014e-06	glycosyl transferase family 2	Other categories	Other
42030	730.652	257.536	2.83709	3.60001e-11	hypothetical protein	Hypothetical
42080	130.256	66.5325	1.95778	1.82331e-05	hypothetical protein	Hypothetical
42200	12.5694	61.8983	-4.92452	3.55271e-15	amino acid transport system ATP-binding protein	Transport and binding proteins
42250	36.3508	18.4411	1.97118	7.21179e-05	two-component sensor histidine kinase	Regulatory functions
42340	98.1031	62.1557	1.57834	0.0105772	glyoxalase family protein	Other categories	Other
42400	110.441	71.9961	1.53399	0.00578989	hypothetical protein	Hypothetical
42500	441.25	240.412	1.83539	0.000111312	hypothetical protein	Hypothetical
42540	373.685	557.048	-1.49069	0.0110112	histidine biosynthesis bifunctional protein HisIE	Amino acid biosynthesis	Aromatic amino acid family
42620	192.438	297.426	-1.54557	0.00640938	transposase	Other categories	Transposon-related functions
42660	414.883	1013.16	-2.44204	2.62294e-08	ferredoxin I	Photosynthesis and respiration	Soluble electron carriers
42680	59.4668	160.019	-2.6909	4.85955e-10	porphobilinogen deaminase	Biosynthesis of cofactors, prosthetic groups, and carriers	Cobalamin, heme, phycobilin and porphyrin
42720	43.8258	87.2986	-1.99195	2.51217e-05	serine/threonine kinase	Regulatory functions
42750	656.754	1197.79	-1.8238	0.00011467	30S ribosomal protein S10	Translation	Ribosomal proteins: synthesis and modification
42840	555.249	859.139	-1.5473	0.00665897	hypothetical protein	Hypothetical
42890	413.14	701.504	-1.69798	0.00720268	unknown protein	Unknown
42940	150.082	81.8973	1.83256	0.000312244	type 2 NADH dehydrogenase	Other categories	Other
42990	92.6063	146.398	-1.58086	0.00392177	hypothetical protein	Hypothetical
43170	27.9212	52.1314	-1.86709	0.000493467	cysteine synthase	Amino acid biosynthesis	Serine family / Sulfur assimilation
43210	14.4555	7.11948	2.03042	0.00373689	sulfatase-modifying factor 1 precursor	Other categories	Other
43330	192.549	456.445	-2.37054	6.12521e-08	PhoH like protein	Other categories	Adaptations and atypical conditions
43340	2778.85	6496.57	-2.33786	1.39804e-06	50S ribosomal protein L20	Translation	Ribosomal proteins: synthesis and modification
43350	4316.96	10526.1	-2.43831	1.46009e-08	50S ribosomal protein L35	Translation	Ribosomal proteins: synthesis and modification
43410	160.122	43.3209	3.69618	2.24265e-14	hypothetical protein	Hypothetical
43520	35.9226	60.134	-1.67399	0.000977604	ribonucleotide reductase subunit alpha	Purines, pyrimidines, nucleosides, and nucleotides	Purine ribonucleotide biosynthesis
43550	26.0482	57.8017	-2.21903	1.1578e-05	hypothetical protein	Hypothetical
43570	5.07743	14.0135	-2.75996	1.11748e-05	hypothetical protein	Hypothetical
43590	22.6529	12.3562	1.83332	9.48944e-05	hypothetical protein	Hypothetical
43640	181.042	120.113	1.50726	0.00937535	glucose 6-phosphate dehydrogenase	Energy metabolism	Pentose phosphate pathway
43670	1571.02	3484.73	-2.21813	0.00122446	phosphoglycerate kinase	Energy metabolism	Glycolysis
43690	3511.41	5890.66	-1.67758	0.0114974	photosystem I subunit XI	Photosynthesis and respiration	Photosystem I
43710	4.76707	9.8701	-2.07048	0.000154709	two-component hybrid sensor and regulator	Regulatory functions
43860	1621.52	3741.91	-2.30766	6.57546e-07	unknown protein	Unknown
43870	1025.49	2393.98	-2.33447	5.39633e-06	50S ribosomal protein L10	Translation	Ribosomal proteins: synthesis and modification
43880	535.847	1396.03	-2.60528	9.9864e-09	hypothetical protein	Hypothetical
43910	703.728	2174.76	-3.09034	4.25549e-09	30S ribosomal protein S1	Other categories	Other
43960	12.5525	25.1261	-2.00168	0.000834444	hypothetical protein	Hypothetical
43970	203.105	322.811	-1.58938	0.00292592	hypothetical protein	Hypothetical
44000	3.14268	6.275	-1.9967	0.00826524	mechanosensitive ion channel homolog	Other categories	Other
44180	77.3384	161.705	-2.09088	2.76663e-06	proline-tRNA ligase	Other categories	Other
44250	1032.13	1968.15	-1.90688	0.00104201	photosystem II manganese-stabilizing polypeptide	Photosynthesis and respiration	Photosystem II
44320	35.8459	63.8994	-1.78261	0.000303546	glycolate oxidase subunit GlcE	Other categories	Other
44400	37.3411	74.7566	-2.00199	1.90726e-05	FO synthase subunit 2	Other categories	Other
44410	247.745	647.184	-2.6123	2.14347e-09	Psb29 Photosystem II sub-stoichiometric subunit	Other categories	Other
44430	490.493	315.28	1.55574	0.00443099	hypothetical protein	Hypothetical
44520	587.774	210.843	2.78773	1.80976e-10	hypothetical protein	Hypothetical
44530	126.734	72.7239	1.74267	0.00150917	transposase	Other categories	Transposon-related functions
44540	1602.73	755.025	2.12275	0.000988728	unknown protein	Unknown
44590	25.4156	46.864	-1.84391	0.000196162	transposase	Other categories	Transposon-related functions
44650	726.285	486.97	1.49144	0.0114004	hypothetical protein	Hypothetical
44810	319.953	481.974	-1.50639	0.00856783	photosystem I assembly related protein	Photosynthesis and respiration	Photosystem I
44840	35.4552	68.3403	-1.92751	5.01132e-05	beta ketoacyl-acyl carrier protein synthase	Other categories	Other
44850	4.8527	8.18706	-1.68711	0.00922841	DNA primase	DNA replication, restriction, modification, recombination, and repair
44880	318.423	501.524	-1.57502	0.00665649	transposase	Other categories	Transposon-related functions
44900	297.978	480.297	-1.61185	0.00234789	transcriptional repressor	Regulatory functions
44930	543.944	1406.46	-2.58567	6.90386e-08	30S ribosomal protein S2	Translation	Ribosomal proteins: synthesis and modification
44940	661.26	1093.31	-1.65337	0.00339975	elongation factor TS	Translation	Protein modification and translation factors
44950	14.2258	42.767	-3.0063	3.95584e-11	squalene-hopene-cyclase	Fatty acid, phospholipid and sterol metabolism
45220	243.516	375.66	-1.54265	0.0101018	urease gamma subunit	Central intermediary metabolism	Other
45230	142.885	264.722	-1.85269	0.000403786	urease beta subunit	Central intermediary metabolism	Other
45250	125.789	58.3095	2.15726	1.1592e-06	group 2 RNA polymerase sigma factor SigD	Transcription	RNA synthesis, modification, and DNA transcription
45610	102.074	162.351	-1.59052	0.00288225	heterodisulfide reductase subunit B	Other categories	Other
45630	1658.78	699.637	2.37092	4.15561e-08	anti-sigma-factor antagonist	Transcription	RNA synthesis, modification, and DNA transcription
45710	3836.3	1413.72	2.71362	1.11041e-07	16.6 kDa small heat shock protein HspA	Cellular processes	Chaperones
45730	10.7311	6.32776	1.69588	0.00971625	phospholipid/glycerol acyltransferase	Other categories	Other
45760	93.4908	31.7014	2.94911	4.93738e-12	hypothetical protein	Hypothetical
45790	230.64	360.904	-1.56479	0.00440044	hypothetical protein	Hypothetical
45820	66.8838	124.731	-1.86489	0.000705391	hypothetical protein	Hypothetical
45830	27.9435	46.8086	-1.67512	0.00649154	4-diphosphocytidyl-2C-methyl-D-erythritol synthase	Other categories	Other
45860	19.6231	41.504	-2.11506	4.21816e-05	1,4-dihydroxy-2-naphthoate synthase	Biosynthesis of cofactors, prosthetic groups, and carriers	Menaquinone and ubiquinone
45870	365.591	618	-1.69041	0.00114837	RNA-binding region protein	Translation	Nucleoproteins
45880	41.2739	77.7233	-1.88311	0.000269781	hypothetical protein	Hypothetical
45890	8.1214	1.68507	4.81962	0.00506361	pentapeptide repeat containing protein	Other categories	Other
45950	22.4718	48.3298	-2.15069	3.26309e-06	amidase	Cell envelope	Murein sacculus and peptidoglycan
45960	58.6048	32.56	1.7999	0.000172012	ABC-transporter ATP-binding protein	Transport and binding proteins
46020	321.046	781.284	-2.43356	2.58051e-08	site-specific recombinase	Other categories	Other
46030	217.71	490.201	-2.25162	1.48668e-06	thioredoxin	Other categories	Other
46040	98.571	215.855	-2.18984	2.74781e-05	hypothetical protein	Hypothetical
46050	88.1011	175.253	-1.98923	2.29506e-05	CP12 polypeptide	Other categories	Other
46190	207.727	25.9051	8.01877	0	cation transporter	Transport and binding proteins
46200	812.872	126.291	6.4365	1.23415e-07	unknown protein	Unknown
46220	33.4252	56.3907	-1.68707	0.00621596	hypothetical protein	Hypothetical
46270	14.6815	7.93978	1.84911	0.00120046	D-alanyl-D-alanine carboxypeptidase/D-alanyl-D-alanine-endopeptidase	Other categories	Other
46390	23.7797	12.6492	1.87994	0.000632173	NAD-dependent epimerase/dehydratase	Other categories	Other
46420	21.3597	12.0393	1.77416	0.000926435	glycosyl transferase family 39	Other categories	Other
46450	59.9796	90.6067	-1.51063	0.0102483	Uma1 protein	Other categories	Other
46460	73.974	145.491	-1.96679	1.48581e-05	aminotransferase	Other categories	Other
46550	41.6395	20.9247	1.98997	0.00111535	pilin polypeptide PilA	Cellular processes	Chemotaxis
46640	117.49	201.576	-1.71569	0.000880163	molybdopterin binding oxidoreductase	Other categories	Other
46710	22.279	8.41595	2.64724	0.000356073	protein of unknown function DUF820	Other categories	Other
46720	16.5673	7.12718	2.32452	0.0041699	protein of unknown function DUF820	Other categories	Other
46740	4.12476	15.7153	-3.80999	2.25617e-06	methylenetetrahydrofolate dehydrogenase (NADP+)	Biosynthesis of cofactors, prosthetic groups, and carriers	Folic acid
46780	290.363	132.802	2.18644	1.24759e-06	periplasmic carboxyl-terminal protease	Translation	Degradation of proteins, peptides, and glycopeptides
47010	2359.46	1123.17	2.10071	1.12583e-05	unknown protein	Unknown
47270	71.7333	30.214	2.37417	4.42144e-07	uroporphyrin-III C-methyltransferase	Biosynthesis of cofactors, prosthetic groups, and carriers	Cobalamin, heme, phycobilin and porphyrin
47280	148.317	72.6988	2.04016	5.32972e-05	protein of unknown function UPF0047	Other categories	Other
47290	5652.1	13219.7	-2.3389	0.000442246	photosystem I subunit III PsaF	Photosynthesis and respiration	Photosystem I
47300	49761.2	94728.5	-1.90366	0.000388083	photosystem I subunit IX	Photosynthesis and respiration	Photosystem I
47310	45.4769	76.8763	-1.69045	0.000783114	hypothetical protein	Hypothetical
47500	135.833	395.267	-2.90995	1.2367e-10	hypothetical protein	Hypothetical
47870	8066.9	16665.2	-2.06587	0.000753412	ribulose bisphosphate carboxylase small subunit	Photosynthesis and respiration	CO2 fixation
47880	5993.91	11590.4	-1.9337	0.00270038	possible Rubisco chaperonin	Other categories	Other
47920	921.613	1679.19	-1.82201	0.000187121	carbon dioxide concentrating mechanism protein CcmL	Photosynthesis and respiration	CO2 fixation
48050	769.629	1406.47	-1.82746	0.000353244	30S ribosomal protein S18	Translation	Ribosomal proteins: synthesis and modification
48070	183.034	102.536	1.78507	0.000410753	two-component sensor histidine kinase	Regulatory functions
48110	11.2915	21.8385	-1.93407	0.00626042	hypothetical protein	Hypothetical
48150	97.0869	219.128	-2.25703	6.33886e-07	CDP-diacylglycerol-glycerol-3-phosphate 3-phosphatidyltransferase (EC 2.7.8.5)	Fatty acid, phospholipid and sterol metabolism
48160	170.54	390.798	-2.29153	3.1803e-07	delta 6 acyl-lipid desaturase	Fatty acid, phospholipid and sterol metabolism
48280	1754.05	960.97	1.82529	0.000132165	hypothetical protein	Hypothetical
48380	478.667	915.676	-1.91297	0.000141874	universal stress protein	Other categories	Other
48390	2531.53	4532.2	-1.7903	0.000468725	unknown protein	Unknown
48440	23.4236	62.3184	-2.6605	0.00037429	unknown protein	Unknown
48630	1124.31	2388.08	-2.12404	8.98166e-06	hypothetical protein	Hypothetical
48640	658.223	1931.97	-2.93513	4.94774e-10	hypothetical protein	Hypothetical
48710	19.253	31.079	-1.61424	0.00437662	thiophen and furan oxidation protein	Cellular processes	Detoxification
48830	107.721	46.9458	2.29458	1.03279e-07	cytochrome P450	Fatty acid, phospholipid and sterol metabolism
48840	32.0442	18.4428	1.73749	0.000559476	hypothetical protein	Hypothetical
48880	88.1349	243.648	-2.76449	1.39533e-10	magnesium protoporphyrin IX chelatase subunit I	Biosynthesis of cofactors, prosthetic groups, and carriers	Cobalamin, heme, phycobilin and porphyrin
48920	77.4476	28.6987	2.69864	5.33534e-10	protein of unknown function DUF482	Other categories	Other
48940	51.0336	26.7847	1.90533	4.00552e-05	two-component sensor histidine kinase	Regulatory functions
48970	203.206	393.08	-1.93439	2.74343e-05	universal stress protein	Other categories	Other
48990	79.7548	148.901	-1.86698	0.00215138	MazG protein homolog	Regulatory functions
49000	1253.29	5106.47	-4.07445	3.01981e-14	hypothetical protein	Hypothetical
49110	4.42454	2.02408	2.18595	0.00996095	unknown protein	Unknown
49240	55.067	21.6292	2.54596	1.76242e-05	hypothetical protein	Hypothetical
49250	180.638	270.826	-1.49927	0.0103597	sulfolipid biosynthesis protein	Fatty acid, phospholipid and sterol metabolism
49440	258.391	161.496	1.59998	0.00284385	heat shock protein 40	Cellular processes	Chaperones
49470	193.496	113.211	1.70916	0.000537544	uncharacterized zinc-type alcohol dehydrogenase-like protein	Other categories	Other
49490	1554.62	28078.3	-18.0612	0	glutamine synthetase inactivating factor IF7	Other categories	Other
49510	62.2039	25.3568	2.45314	1.41581e-06	hypothetical protein	Hypothetical
49840	14.1093	6.52653	2.16184	0.00651142	hypothetical protein	Hypothetical
49930	162.046	33.8278	4.79032	0.001572	hypothetical protein	Hypothetical
49940	45.3274	14.2769	3.17488	9.32171e-10	P-loop containing nucleoside triphosphate hydrolase superfamily	Other categories	Other
50060	38.0637	66.5926	-1.7495	0.000464105	PHA-specific beta-ketothiolase PhaA	Fatty acid, phospholipid and sterol metabolism
50080	388.532	681.655	-1.75444	0.000361532	photosystem II extrinsic protein PsbQ	Photosynthesis and respiration	Photosystem II
50220	35.5443	52.9625	-1.49004	0.0114949	Na-Ca exchanger/integrin-beta4 like	Transport and binding proteins
50240	148.372	70.833	2.09467	4.35899e-06	alkaline phosphatase-like protein	Other categories	Other
50360	88.84	38.2356	2.32349	1.02477e-07	hypothetical protein	Hypothetical
50410	146.463	54.5303	2.6859	3.77168e-10	adenosine/AMP deaminase	Other categories	Other
50450	234.856	390.858	-1.66425	0.00230683	dihydrolipoamide dehydrogenase	Energy metabolism	Pyruvate dehydrogenase
50490	89.3778	37.3141	2.39528	5.95048e-06	phosphoglycolate phosphatase	Energy metabolism	Glycolate pathway
50510	222.353	363.359	-1.63415	0.00364972	hypothetical protein	Hypothetical
50590	110.336	64.4357	1.71234	0.000541243	hypothetical protein YCF45	Hypothetical
50680	33.9773	104.943	-3.08862	1.26148e-11	ribosomal protein L11 methyltransferase	Translation	Ribosomal proteins: synthesis and modification
50690	125.123	253.253	-2.02403	1.30577e-05	D-3-phosphoglycerate dehydrogenase	Amino acid biosynthesis	Serine family / Sulfur assimilation
50700	1337.1	627.852	2.12964	0.00174687	acetohydroxy acid synthase	Other categories	Other
50880	7.43666	3.58965	2.0717	4.7726e-05	hypothetical protein	Hypothetical
51050	23.3513	43.6392	-1.86881	0.000235128	transposase	Other categories	Transposon-related functions
51120	30.9515	51.7626	-1.67238	0.00469841	haloacid dehalogenase-like hydrolase	Other categories	Other
51130	288.324	451.5	-1.56595	0.00475986	nitrilase homolog	Amino acid biosynthesis	Glutamate family / Nitrogen assimilation
51140	461.903	757.527	-1.64001	0.00230611	unknown protein	Unknown
51160	1222.09	2182.02	-1.78548	0.000475448	unknown protein	Unknown
51170	33.7719	56.9058	-1.685	0.00123519	polyA polymerase	Translation	Ribosomal proteins: synthesis and modification
51180	697.669	252.547	2.76253	7.06343e-09	hypothetical protein YCF34	Hypothetical
51190	136.16	33.584	4.05431	2.505e-05	hypothetical protein	Hypothetical
51310	174.269	490.775	-2.81619	0.000885707	hypothetical protein	Hypothetical
51320	174.329	322.659	-1.85086	0.000731735	hypothetical protein	Hypothetical
51340	585.088	323.819	1.80684	0.000230577	hypothetical protein	Hypothetical
51420	512.183	239.652	2.13719	2.20196e-06	hypothetical protein	Hypothetical
51610	12.4316	22.0812	-1.77622	0.00230125	sulfate transport system substrate-binding protein	Transport and binding proteins
51640	3.45815	14.7733	-4.27202	0.000137165	PA-phosphatase related phosphoesterase	Other categories	Other
51650	24.0725	41.1376	-1.7089	0.00199281	putative thiosulfate sulfurtransferase precursor	Other categories	Other
51820	289.555	122.651	2.3608	7.25286e-08	O-acetylhomoserine/O-acetylserine sulfhydrylase	Other categories	Other
51840	1919.06	699.936	2.74176	8.17364e-09	O-acetylhomoserine/O-acetylserine sulfhydrylase	Other categories	Other
51950	0.793682	8.17527	-10.3004	0.000695237	cadmium resistance transporter	Other categories	Other
51980	104.504	36.4629	2.86604	2.19009e-11	putative phosphatidylserine decarboxylase	Other categories	Other
52050	54.9846	21.0201	2.61581	0.000117418	hypothetical protein	Hypothetical
52070	856.28	521.724	1.64125	0.00330253	hypothetical protein	Hypothetical
52260	475.464	903.528	-1.90031	0.000383835	NADH dehydrogenase subunit 7	Photosynthesis and respiration	NADH dehydrogenase
52320	99.7667	159.56	-1.59933	0.00285078	phosphoglucomutase	Other categories	Other
52450	1363.9	598.291	2.27966	1.4994e-05	ATP-dependent Clp protease adaptor protein ClpS	Other categories	Other
52490	1079.68	2265.7	-2.09849	4.43896e-06	50S ribosomal protein L31	Translation	Ribosomal proteins: synthesis and modification
52500	210.976	603.263	-2.85939	1.77816e-10	30S ribosomal protein S9	Translation	Ribosomal proteins: synthesis and modification
52510	566.845	1032.06	-1.82071	0.000144471	50S ribosomal protein L13	Translation	Ribosomal proteins: synthesis and modification
52520	503.17	1083.04	-2.15243	7.18847e-06	tRNA pseudouridine synthase 1	Translation	Aminoacyl tRNA synthetases and tRNA modification
52530	1162.94	1990.17	-1.71133	0.000676475	50S ribosomal protein L17	Translation	Ribosomal proteins: synthesis and modification
52540	1057.11	1969.15	-1.86277	0.00143429	RNA polymerase alpha subunit	Transcription	RNA synthesis, modification, and DNA transcription
52550	913.183	1900.54	-2.08123	4.81391e-06	30S ribosomal protein S11	Translation	Ribosomal proteins: synthesis and modification
52560	1339.01	3271.1	-2.44292	7.80275e-08	30S ribosomal protein S13	Translation	Ribosomal proteins: synthesis and modification
52570	2473.1	5332.73	-2.15629	2.8303e-06	hypothetical protein	Hypothetical
52580	91.3057	168.256	-1.84278	0.00539806	hypothetical protein	Hypothetical
52610	78.4853	45.7788	1.71445	0.00112853	hypothetical protein	Hypothetical
52660	180.979	102.575	1.76436	0.000284647	phosphate transport system regulatory protein PhoU	Regulatory functions
52710	44.8589	97.3004	-2.16903	1.41676e-06	phosphofructokinase	Energy metabolism	Glycolysis
52760	10.6208	4.53633	2.34128	0.000276499	hypothetical protein	Hypothetical
52920	217.569	133.806	1.626	0.00183593	group 3 RNA polymerase sigma factor SigF	Transcription	RNA synthesis, modification, and DNA transcription
52970	23.9463	36.7778	-1.53584	0.0116791	hypothetical protein	Hypothetical
52980	18.2854	31.0772	-1.69956	0.00434794	ribonuclease H like	Transcription	Degradation of RNA
53110	14.2696	21.8595	-1.53189	0.00880114	glycosyl transferase family 39	Other categories	Other
53130	83.6088	157.757	-1.88685	4.66961e-05	3-isopropylmalate dehydratase large subunit	Amino acid biosynthesis	Branched chain family
53230	77.9907	47.4455	1.6438	0.00197446	D-alanyl-D-alanine carboxypeptidase	Other categories	Other
53380	1816.61	3018.64	-1.66169	0.00134061	30S ribosomal protein S14	Translation	Ribosomal proteins: synthesis and modification
53390	354.802	610.833	-1.72162	0.00480384	polyribonucleotide nucleotidyltransferase	Transcription	RNA synthesis, modification, and DNA transcription
53410	78.5722	135.339	-1.72248	0.000485434	peptide chain release factor 1	Translation	Protein modification and translation factors
53470	6.5292	1.53191	4.26213	0.00282772	cellulose synthase	Other categories	Other
53500	105.16	51.4051	2.04571	0.000466971	hypothetical protein	Hypothetical
53520	33.8713	14.5082	2.33463	3.99374e-07	UDP-N-acetylmuramoylalanyl-D-glutamate--2,6-diaminopimelate ligase	Other categories	Other
53540	164.933	261.137	-1.58329	0.00369236	transposase	Other categories	Transposon-related functions
53550	34.8986	13.4273	2.59908	1.27694e-08	serine/threonine protein kinase	Regulatory functions
53600	191.386	115.468	1.65748	0.00110146	tetratricopeptide TPR_2	Other categories	Other
53690	243.597	156.667	1.55487	0.00611778	hypothetical protein	Hypothetical
53700	10.5938	20.2797	-1.9143	0.00182143	33 kDa chaperonin	Cellular processes	Chaperones
53760	27.0404	41.657	-1.54055	0.00883168	hypothetical protein	Hypothetical
53770	175.603	502.821	-2.8634	2.17561e-09	hypothetical protein	Hypothetical
53840	506.457	100.099	5.05956	0	unknown protein	Unknown
53890	40.5653	62.8879	-1.55029	0.00859146	lipoic acid synthetase	Biosynthesis of cofactors, prosthetic groups, and carriers	Lipoate
53960	292.218	26.0232	11.2291	0	ferredoxin-nitrate reductase	Amino acid biosynthesis	Glutamate family / Nitrogen assimilation
53980	109.532	68.6269	1.59605	0.00308475	alpha/beta fold family hydrolase	Other categories	Other
54140	24.1698	10.1165	2.38915	3.20327e-06	hypothetical protein	Hypothetical
54200	63.5324	27.0871	2.34549	0.00163472	hypothetical protein	Hypothetical
54390	558.977	1360.27	-2.4335	1.74693e-08	photosystem II reaction center 13 kDa protein	Photosynthesis and respiration	Photosystem II
54440	15.4818	8.63261	1.79341	0.00139556	FAD dependent oxidoreductase	Other categories	Other
54450	130.803	67.8807	1.92695	0.000454812	hypothetical protein	Hypothetical
54470	1581.16	583.029	2.71197	4.19632e-06	principal RNA polymerase sigma factor SigA	Other categories	Other
54540	156.117	91.6401	1.70359	0.000734858	PpiC-type peptidyl-prolyl cis-trans isomerase	Other categories	Other
54550	113.989	71.6302	1.59135	0.00400916	ABC-transporter ATP-binding protein	Transport and binding proteins
54580	345.38	134.191	2.57379	2.55653e-07	transcriptional regulator	Regulatory functions
54840	3420.42	1689.93	2.024	2.42167e-05	hypothetical protein	Hypothetical
54850	323.871	507.45	-1.56683	0.00758265	inosine-5'-monophosphate dehydrogenase (EC 1.1.1.205)	Purines, pyrimidines, nucleosides, and nucleotides	Purine ribonucleotide biosynthesis
55010	58.786	5.68301	10.3442	7.72049e-08	tetratricopeptide TPR_2	Other categories	Other
55020	302.194	20.9698	14.4109	0.00123682	unknown protein	Unknown
55030	18.9209	0.768281	24.6276	1.10671e-05	tetratricopeptide TPR_2	Other categories	Other
55070	50.9578	6.19684	8.22319	6.83897e-14	tetratricopeptide TPR_2	Other categories	Other
55100	673.022	388.042	1.73441	0.00220573	transcriptional regulator/antitoxin MazE	Regulatory functions
55390	823.164	1440.4	-1.74983	0.00034937	carbon dioxide concentrating mechanism protein CcmK	Photosynthesis and respiration	CO2 fixation
55400	147.526	484.173	-3.28195	3.41498e-11	carbon dioxide concentrating mechanism protein CcmK	Photosynthesis and respiration	CO2 fixation
55440	103.893	52.4374	1.98128	1.11076e-05	pyruvate kinase	Energy metabolism	Glycolysis
55580	148.893	98.1306	1.51729	0.00882289	N-acetylmuramoyl-L-alanine amidase	Cell envelope	Murein sacculus and peptidoglycan
55640	52.6658	18.3016	2.87766	1.18475e-09	transposase	Other categories	Transposon-related functions
55650	23.7082	13.9776	1.69616	0.00546895	hypothetical protein	Hypothetical
55710	18.1445	28.6413	-1.57851	0.00923031	mannosyltransferase	Other categories	Other
55750	79.4127	35.6868	2.22527	0.0105747	hypothetical protein	Hypothetical
55820	115.084	49.7492	2.31328	0.000123277	hypothetical protein	Hypothetical
55840	365.166	161.335	2.2634	0.00571318	hypothetical protein	Hypothetical
55850	551.289	110.464	4.99067	1.10956e-12	hypothetical protein	Hypothetical
55860	834.3	139.5	5.98065	0	hypothetical protein	Hypothetical
55910	1614.82	806.006	2.00348	6.09775e-05	hypothetical protein YCF50	Hypothetical
55990	23.2646	49.8402	-2.14232	1.12527e-05	GTP-binding protein	Other categories	Other
56010	128.409	60.8	2.11199	2.06612e-06	elongation factor EF-G	Translation	Protein modification and translation factors
56070	177.752	83.9874	2.11641	4.45815e-05	FdxN element excision controlling factor protein like	Other categories	Other
56080	23.7687	8.03128	2.95952	0.00379159	FdxN element excision controlling factor protein like	Other categories	Other
56130	366.24	116.842	3.13449	0.00111347	hypothetical protein	Hypothetical
56180	160.899	52.1948	3.08266	0.000358552	hypothetical protein	Hypothetical
56240	22.3081	11.4183	1.95371	3.14473e-05	tetratricopeptide repeat protein 28 like	Other categories	Other
56280	319.061	4007.63	-12.5607	0	cytochrome c553	Photosynthesis and respiration	Soluble electron carriers
56290	40.2636	78.4571	-1.94859	2.1176e-05	hypothetical protein	Hypothetical
56330	113.64	177.719	-1.56388	0.00494915	anti-ECFsigma factor like	Other categories	Other
56380	96.5237	44.9006	2.14972	9.76555e-07	serine protease do-like precursor	Translation	Degradation of proteins, peptides, and glycopeptides
56470	215.24	91.5543	2.35095	2.42509e-07	porin type major outer membrane protein like	Cell envelope	Membranes, lipoproteins, and porins
56560	176.594	88.7759	1.98921	0.00313056	bacilysin biosynthesis protein BacA homolog	Other categories	Other
56630	50.3616	22.6375	2.2247	2.72085e-07	DNA topoisomerase I	DNA replication, restriction, modification, recombination, and repair
56680	87.0089	162.85	-1.87165	7.14997e-05	iron transport system substrate-binding protein	Other categories	Other
56720	22.2318	13.0383	1.70511	0.00895158	creatininase	Other categories	Other
56740	281.565	835.69	-2.96802	1.78944e-11	nucleoside diphosphate kinase	Purines, pyrimidines, nucleosides, and nucleotides	Interconversions and salvage of nucleosides and nucleotides
56760	248.781	411.269	-1.65314	0.00205913	radical S-adenosylmethionine superfamily protein	Other categories	Other
56790	355.819	816.328	-2.29422	1.35832e-07	hypothetical protein	Hypothetical
56890	19.2651	31.196	-1.6193	0.00806801	oligopeptides ABC-transporter permease protein	Other categories	Other
56900	20.176	37.1899	-1.84327	0.000392832	hypothetical protein	Hypothetical
56910	7.86722	13.8227	-1.757	0.0100052	zinc-containing alcohol dehydrogenase superfamily	Other categories	Other
56920	32.5117	79.5042	-2.4454	3.48427e-06	acetyl-CoA carboxylase biotin carboxyl carrier protein	Fatty acid, phospholipid and sterol metabolism
56930	308.787	662.93	-2.14688	1.63713e-06	elongation factor P	Translation	Protein modification and translation factors
57130	76.2091	129.231	-1.69574	0.00407835	hypothetical protein	Hypothetical
57240	597.679	1130.03	-1.8907	0.00011118	adenylate kinase	Purines, pyrimidines, nucleosides, and nucleotides	Purine ribonucleotide biosynthesis
57260	386.832	1195.13	-3.08953	2.60791e-12	50S ribosomal protein L15	Translation	Ribosomal proteins: synthesis and modification
57270	225.42	876.472	-3.88817	0	30S ribosomal protein S5	Translation	Ribosomal proteins: synthesis and modification
57280	425.909	1505.21	-3.53411	4.44089e-15	50S ribosomal protein L18	Translation	Ribosomal proteins: synthesis and modification
57290	406.834	1328.54	-3.26556	6.63025e-13	50S ribosomal protein L6	Translation	Ribosomal proteins: synthesis and modification
57300	632.954	1785.58	-2.82103	1.19532e-10	30S ribosomal protein S8	Translation	Ribosomal proteins: synthesis and modification
57310	880.979	2429.01	-2.75717	4.21262e-09	50S ribosomal protein L5	Translation	Ribosomal proteins: synthesis and modification
57320	917.551	2126.91	-2.31803	1.34372e-07	50S ribosomal protein L24	Translation	Ribosomal proteins: synthesis and modification
57330	993.17	2252.62	-2.26811	6.43399e-07	50S ribosomal protein L14	Translation	Ribosomal proteins: synthesis and modification
57340	2168.71	4859.33	-2.24065	3.19499e-07	30S ribosomal protein S17	Translation	Ribosomal proteins: synthesis and modification
57360	642.376	1144.16	-1.78114	0.00163977	50S ribosomal protein L16	Translation	Ribosomal proteins: synthesis and modification
57370	297.712	506.22	-1.70037	0.00106869	30S ribosomal protein S3	Translation	Ribosomal proteins: synthesis and modification
57430	491.48	803.862	-1.63559	0.00247384	50S ribosomal protein L3	Translation	Ribosomal proteins: synthesis and modification
57440	10304.7	22652.1	-2.19823	6.65538e-07	unknown protein	Unknown
57460	4194.64	2446.77	1.71436	0.0017909	nitrogen regulatory protein P-II	Amino acid biosynthesis	Glutamate family / Nitrogen assimilation
57480	356.709	126.512	2.81957	6.13287e-11	hypothetical protein	Hypothetical
57490	366.926	174.702	2.1003	1.81807e-06	phosphoribosyltransferase	Other categories	Other
57500	3024.79	1604.83	1.8848	7.32023e-05	hypothetical protein	Hypothetical
57530	66.1436	106.114	-1.6043	0.0027296	acetyl-CoA carboxylase beta subunit	Fatty acid, phospholipid and sterol metabolism
57560	26.3376	51.2985	-1.94773	0.000255972	phosphoribosylformylglycinamidine synthase PurL	Purines, pyrimidines, nucleosides, and nucleotides	Purine ribonucleotide biosynthesis
57600	1777.85	2775.96	-1.56141	0.0118669	RNA-binding protein like	Other categories	Other
57610	164.86	286.602	-1.73846	0.000418096	GTP-binding protein	Other categories	Other
57790	50.1616	82.7947	-1.65056	0.00317497	pyridoxamine 5'-phosphate oxidase	Biosynthesis of cofactors, prosthetic groups, and carriers	Pyridoxine
57860	101.784	44.9513	2.26432	2.59603e-05	hypothetical protein	Hypothetical
57870	124.537	72.3656	1.72094	0.00170965	putative hydrogenase expression/formation protein HypB	Other categories	Hydrogenase
57940	92.1754	54.3463	1.69607	0.00194508	hydrogenase subunit of the bidirectional hydrogenase	Other categories	Hydrogenase
58050	9.06858	5.46686	1.65883	0.00707469	tetratricopeptide TPR_2	Other categories	Other
58060	13.0392	5.13444	2.53956	1.29711e-05	hypothetical protein	Hypothetical
58140	5721.81	1674.59	3.41684	0.000194795	photosystem II D1 protein	Photosynthesis and respiration	Photosystem II
58180	155.415	89.4072	1.73828	0.000394945	similar to stage II sporulation protein D	Other categories	Other
58190	66.5218	106.439	-1.60006	0.00687012	(3R)-hydroxymyristol acyl carrier protein dehydrase	Fatty acid, phospholipid and sterol metabolism
58770	34.9997	10.2619	3.41065	1.9984e-14	hypothetical protein	Hypothetical
58780	29.3714	16.0637	1.82843	0.000300957	hypothetical protein	Hypothetical
58790	16.7234	8.56525	1.95247	0.000480877	unknown protein	Unknown
58800	35.2918	21.0827	1.67397	0.0120071	hypothetical protein	Hypothetical
58850	101.087	54.9433	1.83984	8.89835e-05	long-chain-fatty-acid CoA ligase	Other categories	Other
58920	422.268	976.461	-2.31242	0.00524923	unknown protein	Unknown
58970	1441.99	707.132	2.03921	6.79494e-06	hypothetical protein	Hypothetical
58980	165.723	82.1826	2.01652	7.47001e-06	hypothetical protein	Hypothetical
58990	47.5414	23.9145	1.98797	3.17449e-05	hypothetical protein	Hypothetical
59060	16.1981	24.709	-1.52543	0.0120133	beta-carotene ketolase	Other categories	Other
59120	239.223	137.894	1.73483	0.000421804	hypothetical protein	Hypothetical
59140	54.1941	28.983	1.86986	0.000198569	sodium-dependent bicarbonate transporter	Other categories	Other
59200	70.1865	39.0217	1.79865	0.00124527	hypothetical protein	Hypothetical
59230	8802.52	15575.9	-1.76948	0.0011645	photosystem subunit VII	Photosynthesis and respiration	Photosystem I
59340	33.0741	18.9915	1.74152	0.00304757	glutamine amidotransferase, class-II	Other categories	Other
59370	130.278	198.262	-1.52184	0.00725439	threonine synthase	Amino acid biosynthesis	Aspartate family
59400	33.482	20.2344	1.65471	0.00881078	hypothetical protein	Hypothetical
59430	1005.74	211.861	4.74717	3.61933e-14	CAB/ELIP/HLIP superfamily protein	Other categories	Adaptations and atypical conditions
59660	174.532	277.198	-1.58824	0.00341694	hypothetical protein	Hypothetical
59670	12034	5463.81	2.20249	4.13437e-07	hypothetical protein	Hypothetical
59680	39.116	60.884	-1.5565	0.00556857	UDP-N-acetylglucosamine pyrophosphorylase (EC 2.7.7.23)	Cell envelope	Murein sacculus and peptidoglycan
59800	60.2438	21.7537	2.76936	1.34524e-10	potassium-transporting P-type ATPase A chain	Transport and binding proteins
59820	27.5189	16.0111	1.71874	0.000730984	potassium-transporting P-type ATPase B chain	Other categories	Other
59830	21.3984	8.82437	2.42492	0.000968128	cytosine-specific methyltransferase	Other categories	Other
59840	44.3178	18.9979	2.33277	0.0083613	cytosine-specific methyltransferase	Other categories	Other
59930	9.32073	18.7313	-2.00964	0.000110916	phosphoadenosine phosphosulfate reductase	Other categories	Other
59960	169.274	250.055	-1.47722	0.0120008	putative methyltransferase	Other categories	Other
60070	71.2221	131.083	-1.84048	9.85319e-05	McnG protein	Other categories	Other
60130	10.1236	17.0947	-1.6886	0.00635276	transposase	Other categories	Transposon-related functions
60140	82.1623	146.653	-1.78492	0.000268277	hypothetical protein	Hypothetical
60150	211.946	345.588	-1.63055	0.00240933	transposase	Other categories	Transposon-related functions
60310	45.9436	27.8307	1.65082	0.0032752	cysteine synthase	Other categories	Other
60490	27.935	18.4339	1.51541	0.00841674	hemolysin-type calcium-binding region protein	Other categories	Other
60660	63.7993	156.045	-2.44587	1.07193e-07	zinc-binding CMP/dCMP deaminase	Other categories	Other
60680	19.112	62.6506	-3.27808	1.83997e-10	cobalamin biosynthesis protein M	Biosynthesis of cofactors, prosthetic groups, and carriers	Cobalamin, heme, phycobilin and porphyrin
60750	417.395	113.11	3.69017	1.02141e-14	PBS lyase heat-like repeat	Other categories	Other
60820	65.9851	39.1535	1.68529	0.00291723	clock-associated histidine kinase SasA	Regulatory functions
60830	198.147	100.668	1.96832	3.19507e-05	glycoside hydrolase family 57	Other categories	Other
60960	40.378	20.0265	2.01623	1.1846e-05	phosphotransacetylase	Other categories	Other
61070	40.2336	6.3122	6.37394	0.00806062	unknown protein	Unknown
61100	31.8866	50.2343	-1.5754	0.00725287	hypothetical protein	Hypothetical
61180	51.1597	82.532	-1.61322	0.00247091	TPR repeat protein	Other categories	Other
61240	124.668	73.1322	1.70469	0.00100682	aconitate hydratase	Other categories	Other
61250	34.708	10.4989	3.30587	0.00205529	hypothetical protein	Hypothetical
61260	14.1228	4.63729	3.04549	4.52623e-05	unknown protein	Unknown
61320	364.878	242.936	1.50195	0.0103428	hypothetical protein	Hypothetical
61570	25.0754	10.9832	2.28307	1.79895e-07	magnesium protoporphyrin IX chelatase subunit H	Biosynthesis of cofactors, prosthetic groups, and carriers	Cobalamin, heme, phycobilin and porphyrin
61660	48.6325	26.7847	1.81568	0.0083978	hypothetical protein	Hypothetical
61770	322.058	169.464	1.90045	0.000426917	HNH nuclease	Other categories	Other
61790	6.7288	13.5872	-2.01926	0.00111088	hydrogenase expression/formation protein HypD	Other categories	Hydrogenase
61890	34.2212	64.2181	-1.87656	0.000126226	biliverdin reductase	Other categories	Other
61900	204.231	1303.46	-6.38228	0	hypothetical protein	Hypothetical
61920	10.9956	2.23602	4.91749	4.39849e-06	unknown protein	Unknown
61930	80.5161	35.579	2.26302	1.84146e-06	phage shock protein A	Other categories	Other
61950	30.4934	12.1074	2.51858	7.23337e-07	plasma membrane protein	Other categories	Other
61960	29.4574	60.6124	-2.05763	1.06777e-05	alanine dehydrogenase	Other categories	Other
61970	207.707	545.404	-2.62583	0.0107714	unknown protein	Unknown
61980	48.1607	95.4009	-1.98089	1.34534e-05	pyridine nucleotide transhydrogenase beta subunit	Biosynthesis of cofactors, prosthetic groups, and carriers	Nicotinate and nicotinamide
62010	315.614	551.115	-1.74617	0.000407316	transposase	Other categories	Transposon-related functions
62070	34.0501	75.9617	-2.23088	1.41054e-06	transcriptional regulator	Regulatory functions
62170	266.757	176.646	1.51012	0.00893358	transposase	Other categories	Transposon-related functions
62230	158.15	95.319	1.65917	0.00142635	hypothetical protein	Hypothetical
62250	75.2413	122.729	-1.63114	0.00209593	probable tRNA/rRNA methyltransferase	Other categories	Other
62430	52.6395	28.2496	1.86337	0.000193813	FkbM family methyltransferase	Other categories	Other
62470	16.1142	51.1812	-3.17616	7.56462e-12	hypothetical protein	Hypothetical
62530	44.6958	74.1909	-1.65991	0.00128521	isocitrate dehydrogenase (NADP+) (EC 1.1.1.42)	Energy metabolism	TCA cycle
62540	103.916	70.1462	1.48142	0.0113808	unknown protein	Unknown
62660	92.0638	228.791	-2.48514	7.70418e-09	putative phosphoribosylaminoimidazole carboxylase catalytic subunit	Other categories	Other
62670	106.416	295.476	-2.77661	2.98206e-10	hypothetical protein	Hypothetical
62680	48.8185	110.523	-2.26396	3.83235e-07	dihydrodipicolinate synthase	Amino acid biosynthesis	Aspartate family
62690	94.8659	151.703	-1.59913	0.00261398	aspartate beta-semialdehyde dehydrogenese	Amino acid biosynthesis	Aspartate family
62700	74.0294	148.623	-2.00762	1.01699e-05	trigger factor	Cellular processes	Protein and peptide secretion
62770	184.536	340.324	-1.84421	0.000373574	hypothetical protein	Hypothetical
62780	302.255	682.709	-2.25872	4.29002e-07	putative peroxiredoxin	Other categories	Other
62790	243.986	727.9	-2.98337	1.45699e-11	HNH endonuclease	Other categories	Other
62810	1132.15	2771.31	-2.44783	5.8848e-08	hypothetical protein	Hypothetical
62820	996.163	2011.59	-2.01934	1.26825e-05	hypothetical protein	Hypothetical
62950	46.082	30.2225	1.52476	0.0100265	hypothetical protein	Hypothetical
63100	19.0097	31.7117	-1.66819	0.00357568	hypothetical protein	Hypothetical
