# Supplementary material for: Global Transcriptional Responses of the Toxic Cyanobacterium, Microcystis aeruginosa, to Nitrogen Stress, Phosphorus Stress, and Growth on Organic Matter
Source: PLoS One. 2013 Jul 23;8(7):e69834. doi: 10.1371/journal.pone.0069834 (PMC3720943; doi:10.1371/journal.pone.0069834)
Supplement: Table S8 — Differential expression results for the HMWDOM+P treatment compared to the Control treatment. (XLSX) [file pone.0069834.s012.xlsx]

## Sheet: Table S8
Table S8 Differential expression results for the HMWDOM+P treatment as compared to the Control treatment.
MAE Number	HMWDOM +P [FPKM]	Control [FPKM]	Fold Change	p-value	Gene Function	Functional Category	Sub-Category
70	183.473	90.24	2.03317	3.48973e-07	tetratricopeptide repeat protein	Other categories	Other
80	89.8225	57.8068	1.55384	0.00585116	phosphoribosylaminoimidazole carboxylase	Purines, pyrimidines, nucleosides, and nucleotides	Purine ribonucleotide biosynthesis
90	33.2207	12.5361	2.65	1.42893e-06	hypothetical protein	Hypothetical
100	43.0494	27.2864	1.57769	0.00115685	AMP-dependent synthetase and ligase	Other categories	Other
160	81.1231	167.314	-2.06247	0.00712562	putative biotin biosynthesis protein BioY	Other categories	Other
170	111.03	211.963	-1.90906	9.60095e-05	biotin synthetase	Biosynthesis of cofactors, prosthetic groups, and carriers	Biotin
180	43.2514	19.2714	2.24433	6.6191e-05	dTDP-4-dehydrorhamnose 3,5-epimerase (EC 5.1.3.13)	Cell envelope	Surface polysaccharides, lipopolysaccharides and antigens
190	27.6511	13.507	2.04717	0.000106969	dTDP-6-deoxy-L-mannose-dehydrogenase	Cell envelope	Surface polysaccharides, lipopolysaccharides and antigens
210	95.7569	164.992	-1.72303	8.27972e-05	3-isopropylmalate dehydrogenase	Amino acid biosynthesis	Branched chain family
220	3113.04	1178.82	2.64081	5.05573e-12	hypothetical protein	Hypothetical
230	39.9268	24.7391	1.61391	0.000671581	excinuclease ABC subunit C	Other categories	Other
270	187.338	62.6156	2.99187	1.97081e-07	hypothetical protein	Hypothetical
290	59.5713	39.7767	1.49764	0.0130776	two component transcriptional regulator	Regulatory functions
680	137.359	61.2069	2.24418	1.00073e-08	hypothetical protein	Hypothetical
820	75.001	111.341	-1.48453	0.00521745	cobalt transport system permease protein CbiQ homolog	Transport and binding proteins
840	15.5595	79.885	-5.13416	0	hypothetical protein	Hypothetical
880	56.2392	109.878	-1.95376	2.56216e-05	hypothetical protein	Hypothetical
930	2008.75	3965.26	-1.97399	3.988e-05	ATP synthase F1 sector epsilon subunit (EC 3.6.3.14)	Photosynthesis and respiration	ATP synthase
940	1097.42	3199.51	-2.91548	8.01581e-14	hypothetical protein YCF65	Hypothetical
970	95.1257	214.23	-2.25207	1.07523e-08	phospho-N-acetylmuramoyl-pentapeptide-transferase (EC 2.7.8.13)	Cell envelope	Murein sacculus and peptidoglycan
990	1018.1	654.637	1.55521	0.00143293	prevent-host-death family protein	Other categories	Other
1040	197.206	118.821	1.65969	0.0063395	hypothetical protein	Hypothetical
1150	566.901	360.599	1.57211	0.00165156	hypothetical protein	Hypothetical
1230	135.993	201.557	-1.48211	0.00489155	tyrosyl tRNA synthetase	Translation	Aminoacyl tRNA synthetases and tRNA modification
1240	154.068	402.516	-2.61259	2.85074e-06	ferredoxin-thioredoxin reductase variable subunit	Biosynthesis of cofactors, prosthetic groups, and carriers	Thioredoxin, glutaredoxin, and glutathione
1250	5.67514	2.01275	2.8196	0.0106026	hypothetical protein	Hypothetical
1260	46.1747	30.1078	1.53365	0.00643923	alpha/beta fold family hydrolase	Other categories	Other
1310	270.362	166.696	1.62189	0.00155223	flavoprotein	Other categories	Other
1820	252.094	713.998	-2.83227	9.08829e-13	enoyl-[acyl-carrier-protein] reductase	Other categories	Other
1850	53.7976	25.2457	2.13096	3.12759e-05	hypothetical protein	Hypothetical
1860	87.6619	56.2765	1.5577	0.00469246	hypothetical protein	Hypothetical
1900	130.901	201.624	-1.54028	0.0019604	c-type cytochrome synthesis protein Ycf5	Other categories	Other
1940	320.456	189.767	1.68868	0.000409712	hypothetical protein	Hypothetical
2090	779.114	262.786	2.96482	2.90019e-11	argininosuccinate synthetase	Amino acid biosynthesis	Glutamate family / Nitrogen assimilation
2130	92.6877	192.885	-2.08102	0.00041272	phosphoribosylaminoimidazole carboxylase ATPase subunit	Purines, pyrimidines, nucleosides, and nucleotides	Purine ribonucleotide biosynthesis
2140	266.261	517.802	-1.94472	0.00100915	hypothetical protein	Hypothetical
2400	43.3104	17.2773	2.50678	1.34502e-06	hypothetical protein	Hypothetical
2500	232.481	514.74	-2.21412	1.59357e-08	ribose 5-phosphate isomerase	Energy metabolism	Sugars
2510	620.365	1406.1	-2.26657	2.9858e-08	RNA-binding protein	Other categories	Other
2520	4257.32	140.845	30.227	0	phycobilisome degradation protein NblA	Photosynthesis and respiration	Phycobilisome
2580	12872.3	26600.5	-2.06649	4.08636e-07	hypothetical protein	Hypothetical
2590	128.253	75.8296	1.69133	0.000167136	peptidase	Other categories	Other
2790	1456.5	2641.52	-1.81361	0.000216388	thioredoxin	Other categories	Other
2820	654.539	324.111	2.01949	1.68341e-06	RNA polymerase ECF-type sigma-E factor	Transcription	RNA synthesis, modification, and DNA transcription
2890	335.147	761.16	-2.27112	3.34235e-06	hypothetical protein	Hypothetical
3000	75.5745	36.7187	2.0582	2.43627e-07	cell envelope-related transcriptional attenuator	Regulatory functions
3020	33.7025	15.0177	2.24419	0.000151885	GCN5-related N-acetyltransferase	Other categories	Other
3050	269.493	421.8	-1.56516	0.00126886	transposase	Other categories	Transposon-related functions
3060	146.048	215.7	-1.47691	0.00483287	transposase	Other categories	Transposon-related functions
3070	127.904	186.719	-1.45984	0.00706354	nitroreductase	Other categories	Other
3100	25.3631	4.98058	5.0924	7.54952e-15	unknown protein	Unknown
3110	70.1177	16.9271	4.14233	3.26332e-08	transcriptional regulator	Regulatory functions
3170	33.8318	51.5184	-1.52278	0.00790929	probable glycosyl transferase	Other categories	Other
3200	75.3769	36.9723	2.03874	5.39159e-07	saccharopine dehydrogenase	Other categories	Other
3210	515.103	295.8	1.74139	0.000671795	two-component sensor histidine kinase	Regulatory functions
3360	91.1455	172.164	-1.88889	5.19088e-06	transposase	Other categories	Transposon-related functions
3400	171.24	105.729	1.61961	0.000859328	unknown protein	Unknown
3420	74.5053	52.4197	1.42132	0.0107419	ABC-transporter ATP-binding protein	Transport and binding proteins
3470	43.3499	22.8217	1.8995	3.87706e-06	putative calcium binding hemolysin protein	Other categories	Other
3480	172.853	88.3217	1.95708	0.00564035	unknown protein	Unknown
3490	64.2028	22.8636	2.80808	0.000810872	unknown protein	Unknown
3510	105.206	44.8529	2.34558	0.0157303	hypothetical protein	Hypothetical
3520	27.0815	12.4351	2.17783	8.51174e-05	hypothetical protein	Hypothetical
3610	4.25938	2.2596	1.88502	0.00125089	tetratricopeptide repeat protein	Other categories	Other
3700	38.9879	13.9903	2.78678	0.00421207	hypothetical protein	Hypothetical
3750	41.4349	14.7388	2.81128	0.00795857	unknown protein	Unknown
3780	4.37165	2.75537	1.58659	0.0120653	tetratricopeptide repeat protein	Other categories	Other
3790	8.52878	5.26743	1.61915	0.00642611	similar to adenylate cyclase	Other categories	Other
3800	9.18459	4.93734	1.86023	0.00848115	hypothetical protein	Hypothetical
3870	15.2537	24.2088	-1.58708	0.0106156	hypothetical protein	Hypothetical
3890	60.8406	26.1953	2.32258	1.15476e-07	hypothetical protein	Hypothetical
3900	43.3093	24.8701	1.74142	0.0153485	hypothetical protein	Hypothetical
3970	3951.42	828.877	4.7672	0	hypothetical protein	Hypothetical
4000	42.7372	126.278	-2.95476	0.0136734	glycogen debranching enzyme	Other categories	Other
4040	130.849	257.194	-1.96558	0.0118225	protein subunit of ribonuclease P	Transcription	RNA synthesis, modification, and DNA transcription
4050	12375.3	23412.1	-1.89184	1.82646e-05	50S ribosomal protein L34	Translation	Ribosomal proteins: synthesis and modification
4070	24.0962	41.0585	-1.70394	0.00414534	HAD-superfamily hydrolase	Other categories	Other
4080	170.097	284.377	-1.67185	0.000198355	heat shock protein GrpE	Cellular processes	Chaperones
4090	33.1726	22.2634	1.49001	0.00487574	pilus biogenesis protein	Cellular processes	Protein and peptide secretion
4100	95.3462	51.9741	1.83449	1.48144e-05	twitching motility protein PilT	Other categories	Other
4330	155.866	43.9958	3.54275	4.57681e-05	hypothetical protein	Hypothetical
4470	27.0708	17.3875	1.55691	0.0069162	cytosine-specific DNA methylase	Other categories	Other
4510	18.9427	36.6909	-1.93694	0.00100138	urease accessory protein D	Central intermediary metabolism	Other
4520	36.3347	56.1503	-1.54536	0.00490188	isopentenyl monophosphate kinase	Other categories	Other
4700	192.468	86.2478	2.23157	2.14925e-07	hypothetical protein	Hypothetical
4940	80.5177	41.236	1.95261	1.73006e-06	hypothetical protein	Hypothetical
5160	123.613	63.2967	1.95291	8.21743e-05	hypothetical protein	Hypothetical
5210	16.4239	7.84314	2.09405	0.00432443	hypothetical protein	Hypothetical
5220	23.9324	12.0788	1.98136	0.0009563	hypothetical protein	Hypothetical
5380	88.5697	55.5664	1.59394	0.000740052	hypothetical protein	Hypothetical
5420	92.5786	61.3822	1.50823	0.00671587	cobalamin biosynthesis protein CbiX	Biosynthesis of cofactors, prosthetic groups, and carriers	Cobalamin, heme, phycobilin and porphyrin
5550	150.232	99.432	1.5109	0.00513917	hypothetical protein YCF36	Hypothetical
5560	168.247	69.2215	2.43056	5.06971e-08	iojap-related protein	Other categories	Other
5570	100.957	47.3576	2.1318	9.84824e-07	hypothetical protein	Hypothetical
5580	19.0058	10.3763	1.83165	0.000279232	GTP-binding protein	Other categories	Other
5620	219.577	338.752	-1.54275	0.00239628	pyruvate dehydrogenase E1 component beta subunit (EC 1.2.4.1)	Energy metabolism	Pyruvate dehydrogenase
5890	18.7802	12.3122	1.52533	0.0141459	hypothetical protein YCF22	Hypothetical
5990	67.1504	123.022	-1.83204	1.30733e-05	phosphoglycerate mutase	Other categories	Other
6000	757.633	453.266	1.6715	0.00295826	hypothetical protein	Hypothetical
6010	87.3753	149.824	-1.71472	0.000143019	acetolactate synthase	Amino acid biosynthesis	Branched chain family
6020	67.5159	113.12	-1.67546	0.00109756	hypothetical protein	Hypothetical
6080	33.3762	62.8954	-1.88444	0.00224017	CoA binding protein	Other categories	Other
6090	2381.38	1021.02	2.33235	0.00016812	porin type major outer membrane protein	Cell envelope	Membranes, lipoproteins, and porins
6160	195.335	122.785	1.59087	0.00142946	phosphoenolpyruvate carboxykinase	Other categories	Other
6170	7.43914	3.77758	1.96929	0.0071865	hypothetical protein	Hypothetical
6180	39.7582	15.4958	2.56574	6.07919e-07	urea transport system ATP-binding protein	Transport and binding proteins
6190	61.5954	17.4304	3.53379	1.72529e-13	urea transport system ATP-binding protein	Transport and binding proteins
6200	56.3214	19.3301	2.91366	1.12954e-12	urea transport system permease protein	Other categories	Other
6210	38.3372	13.6548	2.8076	1.49025e-10	urea transport system permease protein	Transport and binding proteins
6250	393.734	833.255	-2.11629	1.75091e-07	hypothetical protein	Hypothetical
6260	65.6164	157.443	-2.39945	3.13211e-10	glycogen synthase	Central intermediary metabolism	Polysaccharides and glycoproteins
6280	3346.47	6764.43	-2.02136	2.14914e-06	30S ribosomal protein S15	Translation	Ribosomal proteins: synthesis and modification
6290	439.513	1002.48	-2.28089	4.27346e-09	hypothetical protein	Hypothetical
6300	575.736	1358.07	-2.35884	4.17417e-07	carboxysome formation protein CcmA	Photosynthesis and respiration	CO2 fixation
6350	132.17	67.4757	1.95878	1.57291e-06	HAD-superfamily hydrolase subfamily IIB	Other categories	Other
6360	164.77	85.9969	1.916	3.05382e-06	carboxymethylenebutenolidase	Other categories	Other
6430	593.23	289.831	2.04681	3.29128e-07	hypothetical protein	Hypothetical
6690	11.4064	29.5234	-2.58832	6.8696e-07	tRNA(Ile)-lysidine synthase	Other categories	Other
6700	90.6357	316.676	-3.49394	0	coproporphyrinogen III oxidase, aerobic (EC 1.3.3.3)	Biosynthesis of cofactors, prosthetic groups, and carriers	Cobalamin, heme, phycobilin and porphyrin
6720	61.4764	87.7948	-1.42811	0.0131438	probable inorganic polyphosphate/ATP-NAD kinase 1	Other categories	Other
6770	80.6441	47.8527	1.68526	0.00309329	cupin domain protein	Other categories	Other
6830	838.137	453.373	1.84867	1.03694e-05	thioredoxin M	Other categories	Other
6990	22.747	46.6768	-2.052	0.00830712	hypothetical protein	Hypothetical
7030	123.044	229.162	-1.86244	0.00110273	hypothetical protein	Hypothetical
7050	90.4026	137.96	-1.52606	0.00219425	sulfoquinovosyldiacylglycerol biosynthesis protein SqdX	Fatty acid, phospholipid and sterol metabolism
7070	90.6885	138.202	-1.52392	0.00245393	hypothetical protein	Hypothetical
7170	43.8303	91.4215	-2.08581	5.27033e-07	anthranilate phosphoribosyltransferase	Amino acid biosynthesis	Aromatic amino acid family
7270	40.8852	68.4399	-1.67395	0.000614242	glutathione synthetase	Biosynthesis of cofactors, prosthetic groups, and carriers	Thioredoxin, glutaredoxin, and glutathione
7310	874.265	2001.62	-2.28949	3.05815e-08	50S ribosomal protein L9	Translation	Ribosomal proteins: synthesis and modification
7320	60.282	116.737	-1.93652	3.37986e-05	hypothetical protein	Hypothetical
7330	31.217	47.5652	-1.5237	0.0115861	exodeoxyribonuclease III	DNA replication, restriction, modification, recombination, and repair
7360	439.96	647.234	-1.47112	0.00669849	hypothetical protein	Hypothetical
7500	145.875	102.341	1.42538	0.0133571	transposase	Other categories	Transposon-related functions
7560	23.8657	60.3477	-2.52864	6.1545e-11	NADH-dependent glutamate synthase large subunit	Amino acid biosynthesis	Glutamate family / Nitrogen assimilation
7600	259.031	91.1015	2.84332	1.49432e-05	hypothetical protein	Hypothetical
7610	40.7043	12.5134	3.25286	0.000195096	hypothetical protein	Hypothetical
7650	216.414	97.9892	2.20855	0.00214986	hypothetical protein	Hypothetical
7730	24.6722	75.7622	-3.07075	6.21725e-15	hypothetical protein	Hypothetical
7740	115.536	235.967	-2.04237	0.00115181	hypothetical protein	Hypothetical
7750	21.963	36.9463	-1.68221	0.00346411	hypothetical protein	Hypothetical
7810	7.23316	3.95695	1.82796	0.00205819	hypothetical protein	Hypothetical
7860	111.927	62.2307	1.79858	2.25385e-05	malic enzyme	Energy metabolism	Pyruvate and acetyl-CoA metabolism
7880	107.175	53.3746	2.00798	0.000464881	unknown protein	Unknown
7890	3.68226	2.09946	1.75391	0.0127341	HEAT domain protein repeat-containing protein	Other categories	Other
7920	7.27465	2.38948	3.04445	0.00752465	HEAT domain protein repeat-containing protein	Other categories	Other
7990	45.2721	80.7743	-1.7842	3.53239e-05	putative peptidase M	Other categories	Other
8000	71.7971	103.385	-1.43996	0.00995013	N-acetylmuramic acid 6-phosphate etherase	Other categories	Other
8010	864.008	2125.83	-2.46043	4.56973e-10	50S ribosomal protein L21	Translation	Ribosomal proteins: synthesis and modification
8020	2903.03	5620.3	-1.93601	5.74211e-06	50S ribosomal protein L27	Translation	Ribosomal proteins: synthesis and modification
8080	88.6525	403.363	-4.54993	0	spermine synthase	Other categories	Other
8100	152.376	83.2331	1.83071	0.0110581	thiamineS	Other categories	Other
8140	201.629	71.4489	2.822	9.63452e-13	heat-inducible transcription repressor HrcA	Regulatory functions
8170	39.286	20.5273	1.91384	0.0103351	transposase	Other categories	Transposon-related functions
8240	626.747	355.515	1.76293	0.000899408	hypothetical protein	Hypothetical
8250	419012	15859.1	26.4209	0	CAB/ELIP/HLIP superfamily protein	Other categories	Adaptations and atypical conditions
8260	42.3244	145.996	-3.44945	0	glutamate dehydrogenase (NADP+) (EC 1.4.1.4)	Amino acid biosynthesis	Glutamate family / Nitrogen assimilation
8270	16.3273	52.3966	-3.20914	8.88178e-16	cation-transporting P-type ATPase	Transport and binding proteins
8350	75.4509	125.029	-1.65709	0.00116707	hypothetical protein	Hypothetical
8390	249.263	359.881	-1.44378	0.00823873	hypothetical protein	Hypothetical
8410	23.677	37.1211	-1.56781	0.00143191	glycosidase-like protein	Other categories	Other
8450	50.1993	73.4671	-1.46351	0.00592173	putative glycosyl transferase	Other categories	Other
8520	133.809	86.7516	1.54244	0.00381959	hypothetical protein	Hypothetical
8580	10.6282	26.8825	-2.52936	1.07841e-06	polysaccharide pyruvyl transferase	Other categories	Other
8590	80.8621	121.816	-1.50647	0.00309738	hypothetical protein	Hypothetical
8920	71.0291	122.86	-1.72971	0.00192758	putative translation factor	Other categories	Other
9030	57.8315	29.2331	1.97829	9.5388e-06	hypothetical protein	Hypothetical
9040	150.066	68.6439	2.18615	2.83161e-08	putative carotenoid oxygenase	Other categories	Other
9050	328.368	60.9495	5.38754	0	glutamate--ammonia ligase	Amino acid biosynthesis	Glutamate family / Nitrogen assimilation
9060	4944.58	734.264	6.73406	0	unknown protein	Unknown
9100	291.875	188.293	1.55011	0.0145521	hypothetical protein	Hypothetical
9170	243.158	114.632	2.12121	0.00188537	hypothetical protein	Hypothetical
9180	252.712	91.8556	2.75119	0.000933945	hypothetical protein	Hypothetical
9190	184.165	66.1841	2.78262	5.28022e-13	biopterin transport-related protein BT1 homolog	Other categories	Other
9270	11.3795	4.95011	2.29884	0.000948501	phosphate transport system permease protein	Transport and binding proteins
9310	20.241	10.6166	1.90654	0.00468215	hypothetical protein	Hypothetical
9380	41.6377	20.6954	2.01193	1.27904e-05	transcriptional regulator	Regulatory functions
9570	14.6156	34.043	-2.32922	5.02941e-07	UDP-N-acetylmuramoylalanine--D-glutamate ligase	Cell envelope	Murein sacculus and peptidoglycan
9580	82.3901	40.642	2.02722	5.84378e-07	hypothetical protein	Hypothetical
9640	286.597	1008.38	-3.51846	1.41442e-13	hypothetical protein	Hypothetical
9650	101.571	164.347	-1.61805	0.000557616	ferrochelatase	Biosynthesis of cofactors, prosthetic groups, and carriers	Cobalamin, heme, phycobilin and porphyrin
9660	14.1131	30.7602	-2.17955	0.000217357	methyltransferase	Other categories	Other
9690	23.078	40.5752	-1.75818	0.00148572	hypothetical protein	Hypothetical
9700	660.203	1873.4	-2.83761	2.08871e-09	ketol-acid reductoisomerase	Amino acid biosynthesis	Branched chain family
9710	27.8031	14.2979	1.94456	8.0387e-05	type IV pilus assembly protein PilM	Cellular processes	Chemotaxis
9790	104.294	61.7259	1.68963	0.00133884	ATP-binding protein	Other categories	Other
10040	340.135	223.783	1.51993	0.00263335	transposase	Other categories	Transposon-related functions
10220	6047.59	2269.77	2.66441	5.99854e-05	photosystem II D1 protein	Photosynthesis and respiration	Photosystem II
10240	24141.2	79089.7	-3.27613	9.19915e-11	phycobilisome small core linker polypeptide	Photosynthesis and respiration	Phycobilisome
10260	9307.79	36223.5	-3.89174	9.41988e-08	allophycocyanin beta subunit	Photosynthesis and respiration	Phycobilisome
10270	7635.62	27184.6	-3.56023	1.22445e-07	allophycocyanin alpha subunit	Photosynthesis and respiration	Phycobilisome
10290	1180.43	379.738	3.10854	4.38376e-11	putative peptidase	Other categories	Other
10300	84.0876	51.421	1.63528	0.000411814	periplasmic polyamine-binding protein	Transport and binding proteins
10320	41.8357	78.3017	-1.87165	4.90155e-05	putative peptidase	Other categories	Other
10330	332.09	584.107	-1.75888	6.11171e-05	hypothetical protein	Hypothetical
10340	5240.48	9045.99	-1.72618	0.000102645	hypothetical protein	Hypothetical
10380	3952.57	1143.64	3.45613	2.30969e-08	photosystem II D1 protein	Photosynthesis and respiration	Photosystem II
10410	535.782	211.104	2.538	1.09502e-07	photosystem II D1 protein	Photosynthesis and respiration	Photosystem II
10510	12838.2	5492.4	2.33745	0.00307537	photosystem II D1 protein	Photosynthesis and respiration	Photosystem II
10800	6051	2268.54	2.66735	5.88905e-05	photosystem II D1 protein	Photosynthesis and respiration	Photosystem II
11070	122.261	274.351	-2.24398	3.60982e-05	hypothetical protein	Hypothetical
11130	14.204	5.39217	2.63419	0.00624532	hypothetical protein	Hypothetical
11250	166.285	77.4862	2.146	5.48574e-08	6-phosphogluconolactonase	Energy metabolism	Pentose phosphate pathway
11260	52.5301	16.1265	3.25738	5.77161e-10	FHA domain containing protein	Other categories	Other
11280	230.054	131.005	1.75607	0.00109518	serine/threonine protein phosphatase	Regulatory functions
11310	399.322	1385.75	-3.47026	0	30S ribosomal protein S6	Translation	Ribosomal proteins: synthesis and modification
11320	165.716	477.494	-2.8814	4.04121e-14	hypothetical protein	Hypothetical
11350	115.746	338.364	-2.92333	2.42029e-14	hypothetical protein	Hypothetical
11390	859.693	3934.5	-4.57663	4.19864e-12	unknown protein	Unknown
11400	88.3875	192.262	-2.17522	7.04591e-08	hypothetical protein	Hypothetical
11440	14400.3	6441.04	2.23571	0.000161238	16.6 kDa small heat shock protein	Cellular processes	Chaperones
11820	704.241	1064.02	-1.51087	0.00472773	cytochrome c550	Photosynthesis and respiration	Photosystem II
11830	6014.08	10472.2	-1.74128	0.000107081	hypothetical protein	Hypothetical
11880	545.272	328.305	1.66087	0.000258817	hypothetical protein	Hypothetical
11900	26019.4	46998.7	-1.80629	2.27522e-05	photosystem II PsbK protein	Photosynthesis and respiration	Photosystem II
11910	100.181	225.592	-2.25184	9.87236e-08	pentapeptide repeat family protein	Other categories	Other
11930	67.8095	110.251	-1.62589	0.0101238	transcriptional regulator	Regulatory functions
11940	51.2911	29.1509	1.7595	0.000173994	hypothetical protein	Hypothetical
12070	23.4428	38.232	-1.63086	0.00673011	hypothetical protein	Hypothetical
12100	128.948	55.7688	2.31219	3.90157e-09	probable oxidoreductase	Fatty acid, phospholipid and sterol metabolism
12190	129.247	351.02	-2.71589	7.13294e-09	magnesium protoporphyrin IX chelatase subunit H	Biosynthesis of cofactors, prosthetic groups, and carriers	Cobalamin, heme, phycobilin and porphyrin
12330	38.905	92.5751	-2.37952	7.50707e-09	cobalamin synthesis protein cobW homolog	Biosynthesis of cofactors, prosthetic groups, and carriers	Cobalamin, heme, phycobilin and porphyrin
12340	491.927	263.901	1.86406	0.0104961	unknown protein	Unknown
12350	109.081	24.7991	4.39859	0	polysaccharide biosynthesis protein CapD homolog	Other categories	Other
12470	16.4857	31.4923	-1.91028	0.000379553	ribosomal protein S6 modification protein	Translation	Ribosomal proteins: synthesis and modification
12560	5028.14	7370.34	-1.46582	0.00756856	phycobilisome small rod linker polypeptide	Photosynthesis and respiration	Phycobilisome
12580	61.3015	35.6632	1.7189	0.000366198	hypothetical protein	Hypothetical
12690	220.636	134.007	1.64645	0.000338704	phosphoadenosine phosphosulfate reductase	Amino acid biosynthesis	Serine family / Sulfur assimilation
12920	273.726	498.566	-1.82141	3.90064e-05	phytoene synthase	Other categories	Other
12960	23.2636	34.8228	-1.49688	0.00595171	sodium/sulfate symporter	Transport and binding proteins
13020	193.077	137.31	1.40614	0.0162631	hypothetical protein	Hypothetical
13030	142.425	199.327	-1.39952	0.014999	glycosyl transferase	Other categories	Other
13040	94.7044	58.3571	1.62284	0.00151388	probable peptidase	Other categories	Other
13050	54.4701	76.0471	-1.39613	0.0168799	seryl-tRNA synthetase	Other categories	Other
13090	249.557	473.487	-1.89731	1.68214e-05	peptidyl-prolyl cis-trans isomerase	Translation	Protein modification and translation factors
13130	42.8497	21.767	1.96856	2.86318e-06	putative methyltransferase	Other categories	Other
13150	33.4497	12.1339	2.75671	0.000606006	hypothetical protein	Hypothetical
13230	36.195	59.4237	-1.64177	0.00141934	phenazine biosynthesis protein	Other categories	Other
13250	128.571	90.5784	1.41944	0.0113683	aminopeptidase P	Translation	Degradation of proteins, peptides, and glycopeptides
13260	31.0096	13.486	2.29939	0.000226224	hypothetical protein	Hypothetical
13270	21.0109	8.65767	2.42685	0.000964037	hypothetical protein	Hypothetical
13280	15.7643	8.05224	1.95775	4.21465e-05	DNA ligase	DNA replication, restriction, modification, recombination, and repair
13310	199.581	301.497	-1.51065	0.00354779	hypothetical protein	Hypothetical
13330	52.8625	29.263	1.80646	0.00569572	hypothetical protein	Hypothetical
13360	29.8569	68.2258	-2.28509	2.98424e-06	phosphoglycerate mutase	Other categories	Other
13370	114.733	181.991	-1.58621	0.00120004	probable phosphoglycerate mutase	Other categories	Other
13500	7.54519	1.82768	4.12829	0.0004401	DNA methyltransferase	DNA replication, restriction, modification, recombination, and repair
13510	46.8823	20.2927	2.3103	1.36417e-05	hypothetical protein	Hypothetical
13540	323.36	172.626	1.87318	0.00594327	hypothetical protein	Hypothetical
13550	69.6817	39.2438	1.77561	0.0113609	hypothetical protein	Hypothetical
13620	4909.33	2196.61	2.23496	0.00289638	heat shock protein 70	Cellular processes	Chaperones
13710	23.8317	65.7768	-2.76005	2.58239e-07	abortive infection protein	Other categories	Other
13730	21.0318	39.4836	-1.87733	0.00171197	16S rRNA processing protein RimM homolog	Translation	Ribosomal proteins: synthesis and modification
13750	29.6284	62.4801	-2.10879	0.00374198	hypothetical protein	Hypothetical
13900	8.21494	14.6171	-1.77933	0.00275799	cysteine desulfurase	Other categories	Other
13920	2.33744	7.03926	-3.01153	0.00468693	serine acetyltransferase	Other categories	Other
13930	6.79971	13.9118	-2.04594	0.00273927	cysteine synthase	Other categories	Other
14170	10.3314	4.67696	2.209	0.000409742	hypothetical protein	Hypothetical
14180	19.0365	32.0105	-1.68153	0.00142861	dihydroorotase	Purines, pyrimidines, nucleosides, and nucleotides	Pyrimidine ribonucleotide biosynthesis
14260	82.9716	42.4637	1.95394	2.90995e-05	hypothetical protein	Hypothetical
14280	104.676	235.62	-2.25095	1.07522e-08	phycocyanin alpha phycocyanobilin lyase related protein	Photosynthesis and respiration	Phycobilisome
14300	30.368	19.9661	1.52098	0.0130664	ABC-transporter ATP-binding protein	Transport and binding proteins
14360	174.659	372.682	-2.13377	1.1012e-07	YhbC family protein	Other categories	Other
14380	127.397	68.9345	1.84809	1.34646e-05	two-component response regulator OmpR subfamily	Regulatory functions
14440	70.4814	136.911	-1.94251	1.95329e-06	hypothetical protein	Hypothetical
14490	361.511	565.124	-1.56323	0.00216335	ferredoxin	Photosynthesis and respiration	Soluble electron carriers
14550	160.267	263.593	-1.64471	0.000363495	geranylgeranyl pyrophosphate synthase	Biosynthesis of cofactors, prosthetic groups, and carriers	Carotenoid
14590	72.0884	101.594	-1.4093	0.0166953	dihydrodipicolinate reductase	Amino acid biosynthesis	Aspartate family
14650	13.0494	22.4533	-1.72064	0.0105586	short-chain dehydrogenase/reductase family oxidoreductase	Other categories	Other
14660	20.6593	39.6121	-1.9174	0.000125395	ABC-transporter ATP-binding protein	Transport and binding proteins
14760	213.828	86.3867	2.47524	1.33723e-10	hypothetical protein	Hypothetical
14770	559.47	103.929	5.38319	0	nitrate/nitrite transport system ATP-binding protein	Transport and binding proteins
14780	1067.35	84.1929	12.6774	0	nitrate/nitrite transport system ATP-binding protein	Transport and binding proteins
14790	1806.08	77.9105	23.1815	0	nitrate/nitrite transport system permease protein	Transport and binding proteins
14800	2826.63	177.815	15.8965	0	nitrate transport protein nrtA	Transport and binding proteins
14810	74540.4	3895.48	19.1351	0	unknown protein	Unknown
14830	96.0912	181.304	-1.88679	4.91646e-06	cysteine desulfurase	Amino acid biosynthesis	Glutamate family / Nitrogen assimilation
14840	512.002	3623.75	-7.07761	0	hypothetical protein	Hypothetical
14860	59.5005	85.6991	-1.44031	0.0112346	putative transcripton factor for heterocyst differentiation DevT	Regulatory functions
14890	41.0991	85.8689	-2.08931	1.81905e-06	GTPase family protein	Other categories	Other
14900	38.5788	86.9884	-2.25482	1.08225e-08	NADH-dependent glutamate synthase small subunit	Amino acid biosynthesis	Glutamate family / Nitrogen assimilation
14930	1417.79	3563.64	-2.51352	5.34119e-07	heme oxygenase	Biosynthesis of cofactors, prosthetic groups, and carriers	Cobalamin, heme, phycobilin and porphyrin
14950	91.135	340.374	-3.73483	3.21115e-09	acyl carrier protein	Fatty acid, phospholipid and sterol metabolism
14960	97.2194	318.228	-3.2733	2.22045e-16	3-oxoacyl-[acyl-carrier-protein] synthase II	Fatty acid, phospholipid and sterol metabolism
14970	147.606	290.273	-1.96654	1.63924e-05	transketolase	Energy metabolism	Pentose phosphate pathway
15020	5.71706	3.40356	1.67973	0.0121749	hypothetical protein	Hypothetical
15090	75.0186	27.904	2.68845	5.37224e-10	hypothetical protein	Hypothetical
15120	149.147	226.963	-1.52174	0.00480109	NADH dehydrogenase subunit 5 NdhF	Photosynthesis and respiration	NADH dehydrogenase
15130	566.402	1076.9	-1.9013	3.77492e-05	periplasmic beta-type carbonic anhydrase	Photosynthesis and respiration	CO2 fixation
15160	182.398	277.087	-1.51913	0.00419991	CO2-hydration protein	Other categories	Other
15220	63.4497	96.0264	-1.51343	0.00287192	6-phosphogluconate dehydrogenase	Energy metabolism	Pentose phosphate pathway
15230	223.396	75.8914	2.94363	1.11022e-14	hypothetical protein	Hypothetical
15320	10566	1136.63	9.2959	0	unknown protein	Unknown
15370	29.1392	75.5823	-2.59384	1.78553e-10	3-phosphoshikimate 1-carboxyvinyltransferase	Other categories	Other
15440	47.3592	79.0052	-1.66821	0.0118949	hypothetical protein	Hypothetical
15570	51.0102	24.7049	2.06478	1.39446e-06	3-isopropylmalate dehydrogenase	Other categories	Other
15580	313.87	443.165	-1.41194	0.0143611	hypothetical protein	Hypothetical
15620	35.0677	22.3533	1.56879	0.0038078	hypothetical protein	Hypothetical
15640	1888.46	2910.66	-1.54129	0.0111698	hypothetical protein	Hypothetical
15680	258.376	807.159	-3.12397	4.88498e-15	hypothetical protein	Hypothetical
15700	2.18738	0.815063	2.68369	0.00562471	hypothetical protein	Hypothetical
15720	305.586	203.429	1.50218	0.00644622	N-acetylornithine aminotransferase	Other categories	Other
15730	25.9535	12.3729	2.09761	3.99643e-05	potassium channel	Transport and binding proteins
15750	33.4118	16.5656	2.01694	3.59838e-05	hypothetical protein	Hypothetical
15780	65.9241	36.182	1.82201	1.89712e-05	twitching mobility protein	Cellular processes	Chemotaxis
15790	44.0196	87.6871	-1.992	3.52852e-05	circadian clock protein KaiB homolog	Other categories	Other
15800	93.9848	302.783	-3.22162	0.010782	hypothetical protein	Hypothetical
15810	20.8053	38.3339	-1.84251	9.68213e-05	carboxypeptidase A2 precursor	Other categories	Other
15850	21.7141	43.458	-2.00137	0.000136183	glutathione S-transferase	Biosynthesis of cofactors, prosthetic groups, and carriers	Thioredoxin, glutaredoxin, and glutathione
15900	116.748	177.398	-1.51949	0.00290236	two-component response regulator OmpR subfamily	Regulatory functions
15950	203.907	114.644	1.77861	0.000139455	heat shock protein 70	Cellular processes	Chaperones
15960	70.6389	30.2841	2.33254	1.80908e-08	heat shock protein 40	Cellular processes	Chaperones
15970	50.8205	26.2229	1.93802	8.774e-06	dihydroorotate dehydrogenase	Purines, pyrimidines, nucleosides, and nucleotides	Pyrimidine ribonucleotide biosynthesis
16000	65.236	210.188	-3.22196	4.21885e-15	2-phosphosulfolactate phosphatase	Other categories	Other
16140	16.9301	37.7748	-2.23122	0.000108431	probable sodium-dependent transporte	Other categories	Other
16190	142.657	201.54	-1.41276	0.014325	4-hydroxy-3-methylbut-2-enyl diphosphate reductase	Other categories	Other
16230	579.202	2998.07	-5.17621	0	light-independent protochlorophyllide reductase iron protein subunit ChlL	Other categories	Other
16240	303.399	1415.41	-4.66518	0	hypothetical protein	Hypothetical
16250	271.031	1075.05	-3.96652	4.44089e-16	light-independent protochlorophyllide reductase subunit ChlN	Biosynthesis of cofactors, prosthetic groups, and carriers	Cobalamin, heme, phycobilin and porphyrin
16280	24.1538	12.5345	1.92699	0.000863742	uridine phosphorylase	Other categories	Other
16690	105.805	59.0583	1.79153	2.46888e-05	histidinol dehydrogenase	Other categories	Other
16710	69.4047	134.607	-1.93945	1.80906e-06	biotin carboxylase	Fatty acid, phospholipid and sterol metabolism
16760	57.9934	38.479	1.50714	0.0150085	hypothetical protein	Hypothetical
16770	34.4946	24.3717	1.41535	0.0166208	heat shock protein 70	Cellular processes	Chaperones
16790	11.4313	26.975	-2.35975	1.70595e-06	competence-damage inducible protein CinA homolog	Cellular processes	Transformation
16860	60.9592	95.6793	-1.56956	0.00185241	asparaginase	Energy metabolism	Amino acids and amines
16920	29.4705	148.019	-5.02262	2.22045e-16	superoxide dismutase	Cellular processes	Detoxification
16940	42.0198	93.0716	-2.21495	1.45559e-07	homoserine kinase	Amino acid biosynthesis	Aspartate family
17050	649.457	454.122	1.43014	0.0145113	hypothetical protein	Hypothetical
17060	372.478	185.461	2.00839	4.64035e-06	threonine synthase	Amino acid biosynthesis	Aspartate family
17140	52.3194	96.7528	-1.84927	1.22077e-05	transposase	Other categories	Transposon-related functions
17200	130.271	55.5428	2.34542	1.04777e-09	hypothetical protein	Hypothetical
17290	413.641	913.669	-2.20885	1.14854e-05	ferredoxin-sulfite reductase	Amino acid biosynthesis	Serine family / Sulfur assimilation
17310	221.048	97.4858	2.26749	4.5374e-09	peptide methionine sulfoxide reductase	Translation	Protein modification and translation factors
17360	14.7779	8.32248	1.77566	0.000916342	unknown protein	Unknown
17390	166.555	281.053	-1.68745	0.000249476	sulfate adenylyltransferase	Amino acid biosynthesis	Serine family / Sulfur assimilation
17440	148.246	39.2135	3.78048	0	competence protein ComM homolog	Cellular processes	Transformation
17450	61.2386	19.2863	3.17524	3.77476e-15	hypothetical protein	Hypothetical
17460	40.8124	22.2239	1.83642	0.00853181	hypothetical protein	Hypothetical
17500	63.9424	39.7279	1.60951	0.00180959	ABC-2 type transport system permease protein	Transport and binding proteins
17560	62.5607	118.692	-1.89723	2.11768e-05	two component transcriptional regulator	Regulatory functions
17590	27.337	9.97997	2.73919	1.49813e-11	phosphoenolpyruvate synthase	Other categories	Other
17630	81.603	49.9978	1.63213	0.0118311	unknown protein	Unknown
17650	297.734	474.303	-1.59304	0.000882785	hydrogenase accessory protein HupE	Other categories	Hydrogenase
17660	324.285	506.428	-1.56168	0.00247971	hypothetical protein	Hypothetical
17700	37.9228	23.7435	1.59719	0.00184874	hypothetical protein	Hypothetical
17720	64.9056	23.4781	2.76452	2.92346e-09	lipoate-protein ligase B	Biosynthesis of cofactors, prosthetic groups, and carriers	Lipoate
17740	104.519	63.5313	1.64516	0.00031146	band 7 protein	Other categories	Other
17760	193.015	119.902	1.60977	0.00070844	hypothetical protein	Hypothetical
17770	86.0787	42.7642	2.01287	5.95333e-07	glycosyl transferase group 1	Other categories	Other
18150	138.714	78.702	1.76252	4.79351e-05	UDP-glucose dehydrogenase	Energy metabolism	Sugars
18180	451.964	221.737	2.03829	0.000443346	hypothetical protein	Hypothetical
18190	32.1605	12.2564	2.62398	0.0124971	hypothetical protein	Hypothetical
18220	110.529	63.6929	1.73534	9.87776e-05	hypothetical protein	Hypothetical
18230	330.193	195.06	1.69278	0.000177978	hypothetical protein	Hypothetical
18280	48.0828	88.9993	-1.85096	5.21928e-05	phosphate transport system permease protein	Transport and binding proteins
18290	16.0247	38.495	-2.40223	1.56142e-06	phosphate transport system permease protein	Transport and binding proteins
18300	36.9731	78.2649	-2.11681	8.73568e-07	phosphate transport system permease protein	Transport and binding proteins
18310	14.8	26.1065	-1.76395	0.00196248	phosphate-binding periplasmic protein	Transport and binding proteins
18340	21.8616	35.1252	-1.60671	0.00845575	phosphate transport ATP-binding protein	Transport and binding proteins
18360	34.5231	65.5405	-1.89845	4.6604e-05	phosphate transport system permease protein	Transport and binding proteins
18370	75.222	163.503	-2.17361	3.35817e-08	phosphate transport system permease protein PstC homolog	Transport and binding proteins
18380	23.3347	36.0027	-1.54288	0.00740346	phosphate-binding periplasmic protein	Transport and binding proteins
18410	2893.88	158.109	18.3031	0	ferredoxin--nitrite reductase	Amino acid biosynthesis	Glutamate family / Nitrogen assimilation
18430	142.678	93.5642	1.52492	0.00307465	probable ATP-dependent protease	Translation	Degradation of proteins, peptides, and glycopeptides
18440	79.123	116.032	-1.46648	0.0112997	transcriptional regulator	Regulatory functions
18450	34.4773	54.6355	-1.58468	0.00343431	glucokinase	Energy metabolism	Glycolysis
18490	115.738	22.0678	5.24466	0	hypothetical protein	Hypothetical
18520	159.116	264.411	-1.66175	0.00452814	hypothetical protein	Hypothetical
18530	131.747	224.559	-1.70447	0.000364381	IMP dehydrogenase	Other categories	Other
18590	167.702	7301.03	-43.5357	0	hypothetical protein	Hypothetical
18620	22.0166	14.3551	1.53371	0.00445605	putative protein phosphatase	Other categories	Other
18630	48.3596	102.785	-2.12543	1.75631e-07	hypothetical protein	Hypothetical
18640	88.2562	61.8807	1.42623	0.0101636	amidase enhancer	Other categories	Other
18740	33.2933	15.6942	2.12138	0.000121924	hypothetical protein	Hypothetical
18750	75.8626	36.336	2.08781	8.53537e-06	regulatory protein CII	Other categories	Other
18760	51.8888	20.9276	2.47944	0.000497009	hypothetical protein	Hypothetical
18770	204.685	114.128	1.79347	6.92962e-05	hypothetical protein	Hypothetical
18880	101.031	30.4209	3.3211	2.22045e-16	ABC-transporter substrate-binding protein	Transport and binding proteins
18890	53.2946	12.7962	4.16488	1.55431e-15	ABC-transporter permease protein	Transport and binding proteins
18900	28.9943	8.02005	3.61523	9.83759e-09	ABC-transporter ATP-binding protein	Transport and binding proteins
18910	1402.44	3263.07	-2.32671	2.01698e-05	water-soluble carotenoid protein	Other categories	Other
18990	5.12007	1.16734	4.3861	0.00883079	unknown protein	Unknown
19030	36.3188	122.481	-3.37239	0.00773462	hypothetical protein	Hypothetical
19140	760.719	312.598	2.43354	1.12552e-09	hypothetical protein	Hypothetical
19190	34.5897	20.6415	1.67574	0.00482106	unknown protein	Unknown
19200	12.2317	7.7268	1.58302	0.00252524	unknown protein	Unknown
19220	1196.19	2207.72	-1.84563	0.000183907	cytochrome b6-f complex iron-sulfur subunit (EC 1.10.99.1)	Photosynthesis and respiration	Cytochrome b6/f complex
19230	1031.7	1852.35	-1.79543	0.00154731	apocytochrome f	Photosynthesis and respiration	Cytochrome b6/f complex
19330	63.3458	27.2068	2.32831	0.000429137	peptidase M48	Other categories	Other
19360	148.261	39.0789	3.79389	2.87661e-07	hypothetical protein	Hypothetical
19370	52.3515	132.12	-2.52371	1.61255e-10	transcriptional regulator	Regulatory functions
19430	23.6971	34.4353	-1.45314	0.00810807	isoamylase precursor	Other categories	Other
19460	32.0339	62.7485	-1.95882	2.27312e-05	malonyl coenzyme A-acyl carrier protein transacylase	Fatty acid, phospholipid and sterol metabolism
19470	48.4207	117.027	-2.41688	2.82608e-09	3-oxoacyl-[acyl-carrier-protein] synthase III	Fatty acid, phospholipid and sterol metabolism
19480	107.136	174.881	-1.63233	0.000502933	fatty acid/phospholipid synthesis protein PlsX	Fatty acid, phospholipid and sterol metabolism
19600	278.923	814.754	-2.92107	3.17524e-14	50S ribosomal protein L25	Translation	Ribosomal proteins: synthesis and modification
19610	498.323	1262.4	-2.5333	1.05346e-07	adenylosuccinate synthetase	Purines, pyrimidines, nucleosides, and nucleotides	Purine ribonucleotide biosynthesis
19620	10484.6	4758.45	2.20336	1.69207e-08	hypothetical protein	Hypothetical
19650	36.2418	52.9391	-1.46072	0.0123992	hypothetical protein	Hypothetical
19670	69.9368	24.6005	2.8429	5.26528e-05	hypothetical protein	Hypothetical
19680	108.751	70.6484	1.53933	0.00188328	heat shock protein 40	Cellular processes	Chaperones
19710	111.267	183.313	-1.64751	0.000299169	hypothetical protein	Hypothetical
19750	84.5202	51.8179	1.6311	0.00145368	two-component response regulator	Regulatory functions
19790	189.243	120.732	1.56746	0.00122446	hypothetical protein	Hypothetical
19880	39.5368	70.8118	-1.79104	0.00219821	mutator MutT homolog	DNA replication, restriction, modification, recombination, and repair
20000	9.36589	3.41105	2.74575	0.00126944	bicarbonate transport system permease protein	Transport and binding proteins
20050	103.928	49.1007	2.11663	3.24399e-06	hypothetical protein	Hypothetical
20160	4156.58	6677.24	-1.60643	0.00123676	unknown protein	Unknown
20170	1850.86	3355.39	-1.81288	2.01722e-05	unknown protein	Unknown
20210	19.1228	68.1964	-3.56624	1.351e-07	hypothetical protein	Hypothetical
20220	21.5762	72.7967	-3.37394	2.41502e-08	hypothetical protein	Hypothetical
20330	12.6897	25.3125	-1.99473	0.000425309	transposase	Other categories	Transposon-related functions
20360	144.606	71.2718	2.02894	0.00299154	hypothetical protein	Hypothetical
20370	552.78	347.633	1.59013	0.00849847	hypothetical protein	Hypothetical
20500	57.4836	81.238	-1.41324	0.0160941	ABC-transporter ATP-binding protein	Transport and binding proteins
20680	328.395	202.713	1.62	0.00779814	unknown protein	Unknown
20770	43.4266	77.1933	-1.77756	0.000426015	ABC-transporter ATP-binding protein	Transport and binding proteins
20820	21.1636	12.1411	1.74314	0.00117014	hypothetical protein	Hypothetical
20830	116.699	71.2083	1.63884	0.000341484	peptidase M16-like	Other categories	Other
20980	36.1606	78.148	-2.16114	1.50016e-06	tryptophan synthase alpha chain	Amino acid biosynthesis	Aromatic amino acid family
21110	18.4347	32.8625	-1.78264	0.000812448	ABC-transporter permease protein	Transport and binding proteins
21130	402.343	969.083	-2.4086	3.3437e-09	hypothetical protein	Hypothetical
21270	771.686	300.964	2.56405	0.0036457	unknown protein	Unknown
21290	11.3164	4.26406	2.6539	6.47021e-10	hypothetical protein	Hypothetical
21300	98.5581	64.8093	1.52074	0.00895962	hypothetical protein	Hypothetical
21320	347.525	241.516	1.43893	0.00876906	hypothetical protein	Hypothetical
21380	85.4985	45.4269	1.88211	1.32681e-05	5-methyltetrahydrofolate--homocysteine methyltransferase	Amino acid biosynthesis	Aspartate family
21460	38.0804	55.7948	-1.46518	0.00824282	histidinol dehydrogenase	Amino acid biosynthesis	Aromatic amino acid family
21600	22128.7	5117.8	4.32387	8.88178e-16	hypothetical protein	Hypothetical
21620	53.447	26.3549	2.02797	0.000283179	hypothetical protein	Hypothetical
21640	769.104	2407.33	-3.13004	1.99618e-13	phycobilisome core component	Photosynthesis and respiration	Phycobilisome
21650	12.6355	30.6431	-2.42516	8.04168e-07	glutamate 5-kinase	Other categories	Other
21660	8.64656	16.2744	-1.88218	0.000234239	single-strand-DNA-specific exonuclease RecJ	Other categories	Other
21670	88.836	236.885	-2.66654	1.1822e-08	hypothetical protein	Hypothetical
21680	72.2911	206.171	-2.85196	2.12323e-05	hypothetical protein	Hypothetical
21700	81.3274	133.58	-1.6425	0.000708213	hypothetical protein	Hypothetical
21740	23.6116	38.9538	-1.64977	0.00379682	UDP-N-acetylglucosamine--N-acetylmuramyl-(pentapeptide) pyrophosphoryl-undecaprenol N-acetylglucosamine transferase (EC 2.4.1.227)	Cell envelope	Murein sacculus and peptidoglycan
21870	100.257	38.9691	2.57273	1.45848e-11	type 2 NADH dehydrogenase	Other categories	Other
21960	290.839	159.038	1.82874	1.97209e-05	ABC-2 type transport system permease protein	Transport and binding proteins
21980	90.7008	50.1704	1.80785	0.00792888	hypothetical protein	Hypothetical
22000	1605.15	2665.72	-1.66073	0.000384099	hypothetical protein	Hypothetical
22010	136.151	254.045	-1.86591	8.09469e-06	anion-transporting ATPase	Other categories	Other
22020	96.8518	160.834	-1.66062	0.000241085	chlorophyll a synthase (EC 2.5.1.62)	Biosynthesis of cofactors, prosthetic groups, and carriers	Cobalamin, heme, phycobilin and porphyrin
22030	676.55	316.42	2.13814	2.9837e-07	hypothetical protein	Hypothetical
22040	9877.69	4328.47	2.28203	3.75123e-09	CAB/ELIP/HLIP-related protein	Other categories	Other
22050	139.446	85.0653	1.63928	0.000583823	hypothetical protein	Hypothetical
22160	120.646	296.344	-2.45631	1.45988e-10	two-component response regulator OmpR subfamily	Regulatory functions
22330	154.198	281.291	-1.82422	0.00418746	hypothetical protein	Hypothetical
22390	954.479	493.167	1.93541	5.04199e-06	unknown protein	Unknown
22490	185.613	76.3264	2.43183	9.06788e-08	hypothetical protein	Hypothetical
22570	115.521	52.4142	2.204	1.35986e-08	cytochrome P450	Other categories	Other
22640	69.8093	30.8119	2.26566	0.00154104	hypothetical protein	Hypothetical
22650	328.985	153.166	2.1479	4.26249e-06	unknown protein	Unknown
22700	264.326	56.6438	4.66646	8.21784e-05	hypothetical protein	Hypothetical
22770	197.939	63.1564	3.13411	1.9984e-15	hypothetical protein	Hypothetical
22790	1083	161.414	6.70946	0	unknown protein	Unknown
22800	84.8985	15.586	5.4471	2.53403e-05	serine/threonine kinase	Regulatory functions
22830	47.8518	83.8778	-1.75287	0.00100306	hypothetical protein	Hypothetical
22850	119.304	286.853	-2.40439	1.94417e-07	5-aminolevulinate dehydratase	Biosynthesis of cofactors, prosthetic groups, and carriers	Cobalamin, heme, phycobilin and porphyrin
22860	2181.61	4044.23	-1.85378	0.00855876	GTP cyclohydrolase I	Biosynthesis of cofactors, prosthetic groups, and carriers	Folic acid
22870	0.5	803.758	-1607.52	1.99926e-13	unknown protein	Unknown
22920	157.311	231.438	-1.47121	0.00603215	cytochrome c oxidase subunit XV assembly protein	Other categories	Other
22940	110.657	75.5762	1.46418	0.00649807	cytochrome c oxidase subunit I	Photosynthesis and respiration	Respiratory terminal oxidases
22960	772.196	281.11	2.74695	6.37141e-05	hypothetical protein	Hypothetical
22970	129.396	58.231	2.22212	9.73049e-06	isovaleryl-CoA dehydrogenase	Other categories	Other
23130	31.6381	47.7807	-1.51023	0.00415963	abortive infection protein	Other categories	Other
23140	20.0476	35.0312	-1.7474	0.000582244	probable glycosyl transferase	Other categories	Other
23150	36.4207	54.7758	-1.50397	0.00533616	phosphoribosylamine--glycine ligase	Purines, pyrimidines, nucleosides, and nucleotides	Purine ribonucleotide biosynthesis
23210	110.815	251.838	-2.2726	1.20708e-08	hypothetical protein	Hypothetical
23250	229.734	409.232	-1.78133	6.36644e-05	lactoylglutathione lyase	Other categories	Other
23290	40.8301	67.7662	-1.65971	0.000309621	anthranilate synthetase alpha-subunit	Amino acid biosynthesis	Aromatic amino acid family
23300	4186.84	12332.9	-2.94563	4.49956e-08	photosystem I subunit II	Photosynthesis and respiration	Photosystem I
23360	20.8847	9.06371	2.30421	0.000458471	hypothetical protein	Hypothetical
23370	14.7116	9.43615	1.55907	0.00275304	multidrug efflux transporter	Transport and binding proteins
23490	403.922	766.585	-1.89785	4.60767e-06	photosystem II 11 kDa protein	Photosynthesis and respiration	Photosystem II
23530	9.57136	473.414	-49.4615	0	unknown protein	Unknown
23570	235.41	165.01	1.42664	0.00989882	3-beta hydroxysteroid dehydrogenase/isomerase (EC 1.1.1.145)	Other categories	Other
23580	53.4214	32.2259	1.65772	0.00206624	hypothetical protein	Hypothetical
23600	717.428	1459.48	-2.03432	3.29614e-05	ribose-phosphate pyrophosphokinase	Purines, pyrimidines, nucleosides, and nucleotides	Purine ribonucleotide biosynthesis
23870	41.2313	73.4264	-1.78084	0.000254141	hypothetical protein	Hypothetical
23880	46.0055	100.566	-2.18596	2.05125e-08	protein conferring resistance to acetazolamide Zam	Other categories	Drug and analog sensitivity
23890	20.2092	33.5378	-1.65953	0.00506462	hypothetical protein	Hypothetical
23910	610.662	1486.73	-2.43462	2.67968e-10	hypothetical protein	Hypothetical
23920	340.961	934.451	-2.74064	6.83231e-13	hypothetical protein	Hypothetical
23950	57.1964	22.0878	2.5895	8.70903e-12	hypothetical protein	Hypothetical
23990	20.3657	10.2471	1.98746	0.00595335	hypothetical protein	Hypothetical
24040	257.347	151.936	1.69379	0.000152763	hypothetical protein	Hypothetical
24050	128.375	52.1968	2.45944	1.49316e-10	hypothetical protein	Hypothetical
24060	872.099	375.15	2.32467	2.02926e-08	hypothetical protein	Hypothetical
24070	38.1933	27.1775	1.40533	0.0154081	ABC-transporter ATP-binding protein	Transport and binding proteins
24110	15205.5	9179.51	1.65646	0.000310136	unknown protein	Unknown
24200	19.9906	13.3209	1.50069	0.0119623	hypothetical protein	Hypothetical
24330	32.3751	18.0089	1.79773	0.0032095	hypothetical protein	Hypothetical
24410	159.264	78.2252	2.03597	2.96198e-07	N-acetylglutamate kinase	Amino acid biosynthesis	Glutamate family / Nitrogen assimilation
24420	55.4856	38.9999	1.42271	0.0133969	N-acyl-L-amino acid amidohydrolase	Amino acid biosynthesis	Glutamate family / Nitrogen assimilation
24440	48362.8	254127	-5.2546	6.66134e-16	unknown protein	Unknown
24450	9459.6	52674.7	-5.56839	4.87649e-10	phycocyanin beta subunit	Photosynthesis and respiration	Phycobilisome
24460	9860.04	65300.8	-6.62277	2.22429e-11	phycocyanin alpha subunit	Photosynthesis and respiration	Phycobilisome
24480	390.469	1768.87	-4.53012	0	phycobilisome rod linker polypeptide	Photosynthesis and respiration	Phycobilisome
24500	37.4198	20.8069	1.79843	0.000834814	hypothetical protein	Hypothetical
24610	57.3298	39.5799	1.44846	0.00912132	2-octaprenyl-6-methoxyphenol hydroxylase	Biosynthesis of cofactors, prosthetic groups, and carriers	Menaquinone and ubiquinone
24880	67.943	45.6106	1.48963	0.00704931	tocopherol O-methyltransferase	Fatty acid, phospholipid and sterol metabolism
25010	52.1608	88.8798	-1.70396	0.000178674	pleiotropic regulatory protein homolog	Other categories	Other
25020	229.026	476.505	-2.08057	2.36343e-07	hypothetical protein	Hypothetical
25030	891.853	2230.53	-2.50101	7.11336e-07	NAD(P)-dependent glyceraldehyde-3-phosphate dehydrogenase	Photosynthesis and respiration	CO2 fixation
25120	11652.2	24577.3	-2.10924	8.74312e-08	unknown protein	Unknown
25130	16.6225	34.3615	-2.06717	3.45195e-06	extracellular solute-binding protein	Transport and binding proteins
25140	15.9987	31.8446	-1.99045	0.000142472	ABC-transporter permease protein	Transport and binding proteins
25160	27.4673	47.0395	-1.71256	0.00213349	putative c-type cytochrome biogenesis protein CcdA	Other categories	Other
25170	31.9669	47.6188	-1.48963	0.00714763	c-type cytochrome biogenesis protein Ccs1	Other categories	Other
25230	23.6267	11.1638	2.11637	8.85587e-05	hypothetical protein	Hypothetical
25240	11217.5	2480.72	4.52187	0	hypothetical protein	Hypothetical
25250	241.187	120.967	1.99382	1.17396e-05	unknown protein	Unknown
25260	5.82031	3.52568	1.65083	0.00531304	WD-repeat protein Hat	Other categories	Other
25310	11.8677	18.0022	-1.51691	0.0138342	FHA domain containing protein	Other categories	Other
25320	19.5754	32.42	-1.65616	0.00244012	cation transporter	Transport and binding proteins
25360	188.9	107.796	1.75238	5.77458e-05	hypothetical protein	Hypothetical
25370	3974.81	2695.08	1.47484	0.0114129	hypothetical protein	Hypothetical
25380	33.9802	83.2595	-2.45024	0.00236884	undecaprenyl pyrophosphate synthetase	Other categories	Other
25410	31.0321	61.2788	-1.97469	6.29422e-05	hypothetical protein YCF53	Hypothetical
25420	52.7779	97.887	-1.8547	2.40464e-05	conserved hypothetical protein	Other categories	Other
25450	192.065	501.17	-2.60938	9.71023e-12	hypothetical protein	Hypothetical
25460	2275.27	3861.36	-1.6971	0.000246961	hypothetical protein	Hypothetical
25480	54.9595	34.8654	1.57633	0.00899637	hypothetical protein	Hypothetical
25590	71.5204	41.8004	1.711	0.000421815	hypothetical protein	Hypothetical
25600	32.922	53.9823	-1.6397	0.000357214	alanyl-tRNA synthetase	Translation	Aminoacyl tRNA synthetases and tRNA modification
25670	5.56715	1.57077	3.54422	2.67628e-05	hypothetical protein	Hypothetical
25680	18.1341	10.2881	1.76263	0.000537595	replicative DNA helicase	Other categories	Other
25720	65.9095	24.7095	2.66737	3.95817e-12	deoxyribodipyrimidine photolyase-related protein	Other categories	Other
25730	986.956	401.558	2.45782	0.00165206	unknown protein	Unknown
25740	102.299	53.7866	1.90194	3.61265e-06	hypothetical protein	Hypothetical
25780	264.699	187.111	1.41466	0.0123029	hypothetical protein YCF51	Hypothetical
25850	11.5392	29.3489	-2.54341	1.17138e-06	amino acid ABC-transporter permease protein	Transport and binding proteins
25950	279.495	97.3248	2.87178	6.20477e-11	ATP-dependent Clp protease ATPase subunit	Translation	Degradation of proteins, peptides, and glycopeptides
25970	19.459	30.0296	-1.54322	0.00533849	apolipoprotein N-acyltransferase	Cell envelope	Membranes, lipoproteins, and porins
26010	14.2995	8.52689	1.67699	0.0126322	allergen V5/Tpx-1 related protein	Other categories	Other
26040	223.728	149.834	1.49317	0.00369025	hypothetical protein	Hypothetical
26110	65.814	104.974	-1.59501	0.0104682	hypothetical protein	Hypothetical
26160	11.9555	21.1178	-1.76637	0.00304715	hypothetical protein	Hypothetical
26330	644.118	6016.15	-9.34014	0	hypothetical protein	Hypothetical
26400	1038.43	627.749	1.65421	0.00491357	periplasmic carboxyl-terminal protease	Translation	Degradation of proteins, peptides, and glycopeptides
26410	67.0952	23.4602	2.85996	2.57581e-11	cell division protein FtsQ	Cellular processes	Cell division
26430	35.358	59.7084	-1.68868	0.00122357	phosphomethylpyrimidine kinase	Other categories	Other
26590	40.462	23.5752	1.7163	0.000217583	hypothetical protein	Hypothetical
26620	24.3128	5.75706	4.22313	6.81043e-10	unknown protein	Unknown
26630	24.169	7.56002	3.19695	0.0137828	unknown protein	Unknown
26720	5.44779	2.25891	2.41169	0.000297662	tetratricopeptide protein	Other categories	Other
26730	103.522	16.359	6.32814	5.90639e-14	hypothetical protein	Hypothetical
26770	94.829	34.9925	2.70998	1.65309e-10	hypothetical protein	Hypothetical
26790	103533	4501.39	23.0002	0	hypothetical protein	Hypothetical
26800	1743.63	421.429	4.13742	1.91469e-12	AAA famiry ATPase central region	Other categories	Other
26810	6224.86	2254.44	2.76116	4.19662e-09	hypothetical protein	Hypothetical
26840	31.9776	18.5405	1.72474	0.00301139	amino-acid ABC-transporter ATP-binding protein	Transport and binding proteins
26850	30.2722	13.3919	2.26049	2.29658e-07	amino-acid ABC-transporter permease protein	Transport and binding proteins
26890	261.114	147.421	1.77121	0.000345992	resolvase-like protein	Other categories	Other
27260	16.4772	29.4854	-1.78947	0.00417537	uracil phosphoribosyltransferase	Purines, pyrimidines, nucleosides, and nucleotides	Interconversions and salvage of nucleosides and nucleotides
27270	1485.83	8073.68	-5.43378	0	30S ribosomal protein S21	Translation	Ribosomal proteins: synthesis and modification
27290	51.6563	120.878	-2.34004	1.30559e-09	NADH dehydrogenase subunit 5 NdhF4	Photosynthesis and respiration	NADH dehydrogenase
27310	78.3406	30.0322	2.60855	1.75011e-09	hypothetical protein	Hypothetical
27450	139.322	209.931	-1.5068	0.00294798	cyanophycinase	Other categories	Adaptations and atypical conditions
27460	183.649	119.958	1.53094	0.00576017	cyanophycin synthetase	Other categories	Other
27570	157.145	76.9686	2.04168	0.000835488	hypothetical protein	Hypothetical
27960	247.563	428.85	-1.73229	9.17452e-05	hypothetical protein	Hypothetical
27970	17.2885	27.1697	-1.57155	0.0163269	phycocyanin alpha-subunit phycocyanobilin lyase	Photosynthesis and respiration	Phycobilisome
27980	36.5233	54.0575	-1.48008	0.00512336	pyruvate kinase	Energy metabolism	Glycolysis
27990	1151.22	720.238	1.59839	0.0144848	porin type major outer membrane protein	Cell envelope	Membranes, lipoproteins, and porins
28050	481.857	967.635	-2.00814	4.30779e-05	glucose-1-phosphate adenylyltransferase	Other categories	Other
28060	25.7576	13.4031	1.92176	4.68247e-05	hypothetical protein	Hypothetical
28070	16.5039	28.0732	-1.701	0.00279623	dihydrouridine synthase TIM-barrel protein yjbN	Other categories	Other
28080	16.0987	28.2282	-1.75345	0.00373159	hypothetical protein	Hypothetical
28090	189.106	314.905	-1.66523	0.000993855	similar to chlorobenzene dioxygenase ferredoxin component	Other categories	Other
28100	174.772	264.244	-1.51194	0.00291499	hypothetical protein	Hypothetical
28120	5434.7	3289.22	1.65228	0.000337499	hypothetical protein	Hypothetical
28170	115.177	170.725	-1.48228	0.00432143	histidinol-phosphate aminotransferase	Other categories	Other
28180	126.209	239.742	-1.89956	5.3894e-06	GcpE protein homolog	Other categories	Other
28190	42.9573	62.9692	-1.46586	0.0116408	alpha/beta fold family hydrolase	Other categories	Other
28220	27.8676	56.5531	-2.02935	0.000192363	hypothetical protein	Hypothetical
28280	29.3279	19.61	1.49556	0.0145416	hypothetical protein	Hypothetical
28310	18.733	8.62049	2.17308	0.00200215	hypothetical protein	Hypothetical
28340	255.085	147.646	1.72768	0.00263604	hypothetical protein	Hypothetical
28380	126.634	83.9645	1.50819	0.00304228	orotate phosphoribosyltransferase	Other categories	Other
28390	2389.58	576.167	4.14737	0	hypothetical protein	Hypothetical
28420	93.7446	271.429	-2.89541	4.14162e-09	anti-sigma f factor antagonist	Transcription	RNA synthesis, modification, and DNA transcription
28430	74.3885	183.042	-2.46062	1.13917e-10	carbamoyl-phosphate synthase small chain	Energy metabolism	Amino acids and amines
28480	24.1448	13.9455	1.73137	0.0121978	hypothetical protein	Hypothetical
28500	8.14874	4.40669	1.84917	0.0041038	serine/threonine protein kinase	Regulatory functions
28570	23.8458	35.9218	-1.50642	0.0129647	hypothetical protein	Hypothetical
28670	47.8208	154.15	-3.22349	2.22045e-16	dihydroxyacid dehydratase	Amino acid biosynthesis	Branched chain family
28700	1168.17	701.003	1.66643	0.000375983	hypothetical protein	Hypothetical
28710	179.452	115.898	1.54836	0.0137291	hypothetical protein	Hypothetical
28890	1216.49	2411.71	-1.98252	9.23538e-07	unknown protein	Unknown
28940	46.1255	122.42	-2.65406	9.72196e-11	photosystem I biogenesis protein BtpA	Photosynthesis and respiration	Photosystem I
28970	94.5326	150.097	-1.58778	0.0136428	hypothetical protein	Hypothetical
29040	14.3264	23.6826	-1.65307	0.00041818	adenine specific DNA methyltransferase	Other categories	Other
29110	111.383	66.1509	1.68377	0.000849823	ferredoxin-dependent glutamate synthase	Amino acid biosynthesis	Glutamate family / Nitrogen assimilation
29130	211.586	616.302	-2.91277	0.000818256	hypothetical protein	Hypothetical
29180	36.8257	10.808	3.40726	4.93206e-06	CsbD-like protein	Other categories	Other
29190	775.432	191.297	4.05355	3.49402e-07	CsbD-like protein	Other categories	Other
29460	9.93321	5.28163	1.88071	0.00034034	hypothetical protein	Hypothetical
29470	188.125	74.8923	2.51194	1.22607e-10	hypothetical protein	Hypothetical
29480	5249.38	1993.71	2.63297	4.35431e-10	unknown protein	Unknown
29670	21.9681	37.9898	-1.72932	0.00040926	transposase	Other categories	Transposon-related functions
29890	146.335	80.6565	1.8143	2.48374e-05	hypothetical protein	Hypothetical
30000	273.366	153.148	1.78498	0.000271492	resolvase-like protein	Other categories	Other
30020	2100.5	5450.19	-2.59471	1.40391e-05	fructose-1,6-/sedoheptulose-1,7-bisphosphatase	Other categories	Other
30030	31.8035	13.5815	2.34168	0.0005322	hypothetical protein	Hypothetical
30040	256.608	180.951	1.41811	0.0117467	hypothetical protein	Hypothetical
30060	3833.46	8414.47	-2.19501	0.00389578	photosystem II protein PsbY	Photosynthesis and respiration	Photosystem II
30090	69.8966	218.55	-3.12676	6.66134e-16	adenylosuccinate lyase	Purines, pyrimidines, nucleosides, and nucleotides	Purine ribonucleotide biosynthesis
30210	3756.87	604.328	6.21661	0	unknown protein	Unknown
30230	212.768	60.4598	3.51916	2.12826e-09	peptidase	Other categories	Other
30240	83.5198	41.787	1.9987	0.000395701	cobalamin [5'-phosphate] synthase	Biosynthesis of cofactors, prosthetic groups, and carriers	Cobalamin, heme, phycobilin and porphyrin
30290	662.099	291.375	2.27233	6.72444e-07	hypothetical protein	Hypothetical
30500	14.5092	24.3888	-1.68092	0.00251416	hypothetical protein	Hypothetical
30510	377.467	219.926	1.71634	0.000475883	serine protease HtrA	Translation	Degradation of proteins, peptides, and glycopeptides
30550	228.903	460.901	-2.01352	0.00033743	uridine monophosphate kinase	Purines, pyrimidines, nucleosides, and nucleotides	Pyrimidine ribonucleotide biosynthesis
30600	28.7589	10.888	2.64134	6.64004e-11	serine/threonine protein kinase	Regulatory functions
30610	1768.76	107.991	16.3788	0	hypothetical protein	Hypothetical
30620	181.269	50.3697	3.59877	0	periplasmic protease HhoA	Translation	Degradation of proteins, peptides, and glycopeptides
30650	69.8324	37.7225	1.85121	0.00161177	hypothetical protein	Hypothetical
30660	52.5182	24.9817	2.10227	0.00254828	hypothetical protein	Hypothetical
30700	29.3004	18.5615	1.57856	0.00105538	hypothetical protein	Hypothetical
30710	47.3902	31.3074	1.51371	0.00628246	hypothetical protein	Hypothetical
30720	44.9771	28.9901	1.55146	0.0108624	hypothetical protein	Hypothetical
30820	41.7088	25.5451	1.63275	0.0100623	hypothetical protein	Hypothetical
30870	106.682	194.677	-1.82483	0.00309873	CRISPR-associated protein Cas2	Other categories	Other
30880	186.976	505.836	-2.70535	5.21017e-05	unknown protein	Unknown
31170	155.639	93.7986	1.65929	0.000335279	ABC-transporter membrane fusion protein	Transport and binding proteins
31210	425.896	227.239	1.87422	0.000574755	virulence-associated protein VapB-like protein	Other categories	Other
31220	90.789	43.7524	2.07506	5.88188e-05	virulence-associated protein VapC-like protein	Regulatory functions
31240	10.6952	5.56484	1.92192	0.00288298	glycosyl transferase family 2	Other categories	Other
31270	48.2058	24.049	2.00448	2.70147e-06	S-layer region-like precursor	Other categories	Other
31280	29.1678	17.232	1.69265	0.000234866	copper-transporting P-type ATPase PacS	Transport and binding proteins
31290	110.157	302.732	-2.74819	7.04548e-13	uroporphyrinogen decarboxylase	Biosynthesis of cofactors, prosthetic groups, and carriers	Cobalamin, heme, phycobilin and porphyrin
31300	20.7332	44.2997	-2.13666	8.82255e-06	NAD-dependent epimerase/dehydratase	Other categories	Other
31310	26.2141	52.0281	-1.98474	3.05044e-06	ABC-transporter ATP-binding protein	Transport and binding proteins
31330	45.6496	89.8955	-1.96925	9.79814e-05	adenylylsulfate kinase	Amino acid biosynthesis	Serine family / Sulfur assimilation
31370	4.85333	14.3827	-2.96347	0.00116412	dephospho-CoA kinase	Other categories	Other
31380	24.2701	93.1738	-3.83904	2.84217e-14	phosphoribosyl aminoidazole succinocarboxamide synthetase	Purines, pyrimidines, nucleosides, and nucleotides	Purine ribonucleotide biosynthesis
31400	226.428	105.552	2.14518	2.7814e-05	hypothetical protein	Hypothetical
31480	38.2479	56.4089	-1.47482	0.00497177	aminopeptidase	Translation	Degradation of proteins, peptides, and glycopeptides
31510	2.56749	6.18963	-2.41077	0.0063184	sulfate transport system ATP-binding protein	Transport and binding proteins
31520	2.7576	9.09064	-3.29658	0.000562803	sulfate transport system permease protein	Transport and binding proteins
31530	7.64178	20.403	-2.66993	1.3011e-05	sulfate transport system permease protein	Transport and binding proteins
31540	25.5185	52.739	-2.0667	0.00612004	hypothetical protein	Hypothetical
31550	9.12289	19.5589	-2.14394	0.000130382	sulfate transport system substrate-binding protein	Transport and binding proteins
31560	99.1493	155.035	-1.56365	0.00150356	hypothetical protein	Hypothetical
31570	25.0469	52.4029	-2.09219	4.4045e-05	ribonuclease III	Transcription	Degradation of RNA
31590	121.684	339.698	-2.79164	7.62319e-09	threonyl-tRNA synthetase	Translation	Aminoacyl tRNA synthetases and tRNA modification
31600	40.9725	63.7836	-1.55674	0.00661399	cobalamin synthesis protein cobW homolog	Biosynthesis of cofactors, prosthetic groups, and carriers	Cobalamin, heme, phycobilin and porphyrin
31650	55.4804	96.9052	-1.74666	0.000446965	hypothetical protein	Hypothetical
31680	71.6622	169.622	-2.36697	0.00138371	hypothetical protein	Hypothetical
31690	29.6257	66.1386	-2.23247	9.86688e-09	ferrous iron transport protein B	Other categories	Other
31700	33.6893	94.6048	-2.80816	1.88503e-09	ferrous iron transport protein A	Other categories	Other
31720	18.6181	12.2931	1.51452	0.00543042	two-component hybrid sensor and regulator	Regulatory functions
31750	30.7359	49.5994	-1.61373	0.000947101	circadian clock protein KaiC homolog	Other categories	Other
31780	40.644	63.1061	-1.55265	0.00201136	N-acetylornithine aminotransferase	Other categories	Other
31800	6764.49	20347.7	-3.00802	5.17342e-12	photosystem I reaction center subunit IV	Photosynthesis and respiration	Photosystem I
31860	121.893	60.8648	2.00268	0.0104594	hypothetical protein	Hypothetical
31880	511.13	298.128	1.71446	0.000111267	Mo-dependent nitrogenase-like	Other categories	Other
31930	69.5672	40.9214	1.70002	0.00309709	2-C-methyl-D-erythritol 2,4-cyclodiphosphate synthase	Other categories	Other
32000	2680.22	4485.23	-1.67346	0.000212217	50S ribosomal protein L28	Translation	Ribosomal proteins: synthesis and modification
32010	3444.28	5179.96	-1.50393	0.00540566	photosystem I reaction center subunit X	Photosynthesis and respiration	Photosystem I
32020	24.3282	12.5493	1.93861	0.000136459	amino-acid ABC-transporter permease protein	Transport and binding proteins
32030	277.221	131.478	2.1085	7.68685e-06	unknown protein	Unknown
32050	116.399	66.8797	1.74042	6.73308e-05	hypothetical protein	Hypothetical
32060	592.289	278.276	2.12842	0.000127685	unknown protein	Unknown
32100	279.145	161.894	1.72425	0.000153132	FAD dependent oxidoreductase	Other categories	Other
32110	2182.32	1155.83	1.8881	1.28534e-05	hypothetical protein	Hypothetical
32160	6413.27	13474	-2.10096	0.000308201	unknown protein	Unknown
32170	657.935	1470.44	-2.23493	2.6302e-05	RNA binding protein	Translation	Nucleoproteins
32180	2257.44	4206.13	-1.86323	2.52651e-05	hypothetical protein	Hypothetical
32200	76.4545	40.3615	1.89424	0.000456564	hypothetical protein	Hypothetical
32210	4936.47	7506.54	-1.52063	0.00255933	photosystem II reaction center protein Z	Photosynthesis and respiration	Photosystem II
32220	189.289	282.573	-1.49281	0.00404014	riboflavin synthase beta subunit	Biosynthesis of cofactors, prosthetic groups, and carriers	Riboflavin
32280	25.9271	15.9317	1.62739	0.00947267	hypothetical protein	Hypothetical
32340	11.3454	27.2464	-2.40154	3.23594e-05	similar to Zn-dependent protease precursor	Other categories	Other
32350	139.377	919.847	-6.5997	0	preprotein translocase SecG subunit	Cellular processes	Protein and peptide secretion
32370	258.83	159.691	1.62082	0.00121182	2,3-bisphosphoglycerate-independent phosphoglycerate mutase	Energy metabolism	Glycolysis
32380	68.2437	46.3608	1.47201	0.00716444	phosphate-binding protein PstS homolog	Transport and binding proteins
32430	1363.78	3973.16	-2.91334	1.145e-09	30S ribosomal protein S4	Translation	Ribosomal proteins: synthesis and modification
32440	164.139	97.8602	1.67728	0.000420339	hypothetical protein	Hypothetical
32610	11.4553	4.46822	2.56373	3.16084e-08	DNA methylase	Other categories	Other
32630	62.9422	36.8156	1.70966	0.00419622	hypothetical protein	Hypothetical
32660	386.851	598.323	-1.54665	0.00581307	molybdopterin biosynthesis protein MoeB	Biosynthesis of cofactors, prosthetic groups, and carriers	Molybdopterin
32670	463.568	775.634	-1.67318	0.000193698	glycine decarboxylase complex H-protein	Energy metabolism	Amino acids and amines
32770	34.3543	22.7549	1.50975	0.0149267	transposase	Other categories	Transposon-related functions
32790	378.316	249.638	1.51546	0.00309818	hypothetical protein	Hypothetical
32940	161.436	62.7471	2.5728	1.81103e-10	protein-tyrosine kinase	Other categories	Other
32980	86.1287	239.259	-2.77792	7.5118e-08	hypothetical protein	Hypothetical
32990	2578.96	4884.82	-1.8941	0.00893295	photosystem II core light harvesting protein PsbB	Photosynthesis and respiration	Photosystem II
33000	64567.6	95369.2	-1.47704	0.00579469	photosystem II reaction center protein J	Photosynthesis and respiration	Photosystem II
33030	7765.07	12130.5	-1.56219	0.00497113	photosystem II cytochrome b559 alpha subunit	Photosynthesis and respiration	Photosystem II
33040	1191.59	1714.04	-1.43845	0.0144235	hypothetical protein	Hypothetical
33050	1740.38	4379.84	-2.5166	0.00524567	hypothetical protein	Hypothetical
33060	693.908	1216.17	-1.75264	0.000291152	hypothetical protein	Hypothetical
33070	430.345	762.447	-1.77171	4.67696e-05	membrane-associated rubredoxin	Fatty acid, phospholipid and sterol metabolism
33550	218.755	142.466	1.53549	0.00202665	squalene/phytoene synthase	Other categories	Other
33560	4867.66	2794.81	1.74168	0.00320617	cytochrome b6-f complex subunit 4	Photosynthesis and respiration	Cytochrome b6/f complex
33590	198.54	78.2057	2.53869	8.71945e-11	hypothetical protein	Hypothetical
33600	113.594	36.5453	3.10831	1.44973e-12	hypothetical protein	Hypothetical
33610	35.1684	13.0519	2.6945	0.00116819	hypothetical protein	Hypothetical
33700	89.1326	55.4585	1.60719	0.00594013	hypothetical protein	Hypothetical
33710	220.095	140.39	1.56774	0.00193592	putative modulator of DNA gyrase	Other categories	Other
33720	178.141	450.076	-2.52652	9.26934e-11	hypothetical protein	Hypothetical
33870	92.8638	129.864	-1.39844	0.0158387	putative peptidase	Other categories	Other
33890	45.9445	70.1168	-1.52612	0.00680015	putative proteasome-type protease	Other categories	Other
33970	54.4206	96.2982	-1.76952	0.000104952	excinuclease ABC subunit A	DNA replication, restriction, modification, recombination, and repair
34030	54.1364	23.7904	2.27556	8.35355e-07	hypothetical protein	Hypothetical
34250	124.273	242.645	-1.95252	0.000133035	hypothetical protein	Hypothetical
34290	31.5692	47.4549	-1.5032	0.005926	transposase	Other categories	Transposon-related functions
34460	93.2041	386.336	-4.14505	0	ferrochelatase	Other categories	Other
34620	69.0296	271.721	-3.9363	0	omega 3 acyl-lipid desaturase	Fatty acid, phospholipid and sterol metabolism
34630	27.3631	14.2493	1.92031	0.000159191	DNA cytosine methylase	Other categories	Other
34680	182.647	57.1456	3.19617	0.000295073	unknown protein	Unknown
34730	277.868	388.592	-1.39848	0.016545	transposase	Other categories	Transposon-related functions
34870	11.7955	23.6866	-2.0081	7.58832e-06	putative phosphoketolase	Other categories	Other
34890	155.489	403.205	-2.59314	3.68869e-11	glyceraldehyde 3-phosphate dehydrogenase	Photosynthesis and respiration	CO2 fixation
34970	108.806	55.5428	1.95896	7.34641e-05	hypothetical protein	Hypothetical
35000	29.0549	7.99852	3.63253	7.13622e-07	hypothetical protein	Hypothetical
35010	295.538	67.4388	4.38231	0	hypothetical protein	Hypothetical
35020	425.421	109.019	3.90226	6.66134e-16	pentapeptide repeat family protein	Other categories	Other
35030	104.916	46.8088	2.24137	0.000140287	hypothetical protein	Hypothetical
35040	412.8	131.881	3.13009	0.000515523	unknown protein	Unknown
35050	165.51	41.8023	3.95935	0	hypothetical protein	Hypothetical
35060	48.7729	33.3279	1.46343	0.0141429	hypothetical protein	Hypothetical
35130	2126.24	3393.11	-1.59583	0.00342026	transcriptional regulator AbrB	Regulatory functions
35480	9.21041	4.47875	2.05647	0.0136694	hypothetical protein	Hypothetical
35510	43.9388	126.761	-2.88494	6.70575e-14	phenylalanyl-tRNA synthetase	Translation	Aminoacyl tRNA synthetases and tRNA modification
35590	16.1353	57.4283	-3.55917	0.000757443	hypothetical protein	Hypothetical
35640	74.5136	49.2742	1.51222	0.0106605	hypothetical protein	Hypothetical
35750	35.4882	52.8945	-1.49048	0.0124979	hypothetical protein	Hypothetical
35820	28.5246	47.0105	-1.64807	0.000962215	major facilitator superfamily protein	Other categories	Other
36000	3633.94	5816.81	-1.60069	0.00242571	unknown protein	Unknown
36020	11.2293	32.503	-2.89448	1.2927e-06	N-(5'-phosphoribosyl)anthranilate isomerase (EC 5.3.1.24)	Amino acid biosynthesis	Aromatic amino acid family
36030	300.223	533.321	-1.77642	6.20187e-05	GTP cyclohydrolase I	Biosynthesis of cofactors, prosthetic groups, and carriers	Folic acid
36040	178.726	445.427	-2.49223	1.06087e-10	short-chain dehydrogenase/reductase	Other categories	Other
36050	11.432	21.4936	-1.88013	0.00144261	hypothetical protein	Hypothetical
36090	78.8546	215.872	-2.7376	3.76645e-08	hypothetical protein	Hypothetical
36100	106.542	800.501	-7.51348	5.66221e-08	hypothetical protein	Hypothetical
36110	9.95325	18.0659	-1.81508	0.00208276	probable glycosyl transferase	Other categories	Other
36120	18.0184	10.5275	1.71156	0.00310316	PxcA protein	Biosynthesis of cofactors, prosthetic groups, and carriers	Cobalamin, heme, phycobilin and porphyrin
36130	74.9207	37.0893	2.02001	7.53587e-07	RND multidrug efflux transporter	Other categories	Other
36160	43.5487	28.4147	1.53261	0.00266398	eukaryotic Na+/H+ exchanger	Other categories	Other
36310	496.237	897.102	-1.80781	0.000619042	unknown protein	Unknown
36340	25.2741	123.872	-4.90114	0.0102662	unknown protein	Unknown
36430	163.364	111.369	1.46687	0.00700694	hypothetical protein	Hypothetical
36460	4.80055	2.0221	2.37404	0.0139711	UDP-glucose:tetrahydrobiopterin glucosyltransferase (EC 2.4.1.-)	Energy metabolism	Sugars
36510	185.173	811.461	-4.38218	0	peroxiredoxin	Other categories	Other
36590	912.065	3679.11	-4.03382	0	50S ribosomal protein L19	Translation	Ribosomal proteins: synthesis and modification
36600	388.744	1100.24	-2.83024	0.0166567	preprotein translocase SecE subunit	Cellular processes	Protein and peptide secretion
36610	337.023	827.398	-2.45502	5.6308e-09	transcription antitermination protein NusG	Regulatory functions
36620	397.019	1005.19	-2.53184	2.90172e-11	50S ribosomal protein L11	Translation	Ribosomal proteins: synthesis and modification
36630	111.539	558.768	-5.00962	0	50S ribosomal protein L1	Translation	Ribosomal proteins: synthesis and modification
36680	42.3031	67.3043	-1.591	0.0026221	riboflavin biosynthesis protein RibF	Biosynthesis of cofactors, prosthetic groups, and carriers	Riboflavin
36690	1445.43	2405.95	-1.66452	0.00186041	hypothetical protein	Hypothetical
36700	83.4236	24.9179	3.34794	6.66134e-16	hypothetical protein	Hypothetical
36740	66.9705	43.7089	1.53219	0.00231294	integral membrane protein IctB	Other categories	Other
36750	28.7452	10.0569	2.85826	3.11413e-11	pyruvate decarboxylase isozyme 1	Other categories	Other
36860	21.4062	13.804	1.55072	0.0100103	similar to flotillin	Other categories	Other
36870	111.611	35.9538	3.10429	1.68793e-08	mannose-6-phosphate isomerase	Energy metabolism	Sugars
36930	17.6536	8.64834	2.04127	7.37304e-06	hypothetical protein	Hypothetical
36950	14.6888	24.2561	-1.65133	0.00261598	hypothetical protein	Hypothetical
37190	134.364	263.391	-1.96028	2.04192e-06	putative arsenical pump-driving ATPase	Other categories	Drug and analog sensitivity
37270	62.2108	116.452	-1.87189	6.27352e-06	aspartyl-tRNA synthetase	Other categories	Other
37320	853.489	397.172	2.14892	9.19779e-06	putative HlyD family secretion protein	Other categories	Other
37330	18.0719	6.39526	2.82583	0.0150647	hypothetical protein	Hypothetical
37340	38.5676	19.7394	1.95384	1.42408e-06	RND multidrug efflux transporter	Other categories	Other
37350	18.4269	40.8412	-2.21639	1.89047e-05	aldo/keto reductase	Other categories	Other
37380	194.968	117.434	1.66023	0.000239894	hypothetical protein	Hypothetical
37390	311.968	202.578	1.53999	0.00194921	probable ribosomal large subunit pseudouridine synthase B	Translation	Ribosomal proteins: synthesis and modification
37500	12.8496	5.57562	2.3046	1.19469e-05	hypothetical protein	Hypothetical
37680	2064.94	2876.02	-1.39279	0.0170427	gas vesicle protein GvpG	Other categories	Other
37760	35.5342	64.4147	-1.81275	0.000101767	putative glutaminase	Other categories	Other
37850	20.7383	38.5777	-1.86022	0.00014753	hypothetical protein	Hypothetical
37870	160.113	258.162	-1.61237	0.000641999	hypothetical protein	Hypothetical
37940	36.7629	21.5748	1.70397	0.000955703	amino acid ABC-transporter permease protein	Transport and binding proteins
38000	41.0337	94.234	-2.2965	3.15326e-09	Na+/H+ antiporter	Transport and binding proteins
38060	90.1278	273.5	-3.03458	0.000811178	transposase	Other categories	Transposon-related functions
38110	1357.44	871.44	1.5577	0.00535821	SOS-response transcriptional repressor LexA	Regulatory functions
38140	26.5116	46.2321	-1.74384	6.2005e-05	pyruvate-flavodoxin oxidoreductase	Photosynthesis and respiration	Soluble electron carriers
38150	30.8649	54.4407	-1.76384	0.000290866	dihydroorotate dehydrogenase	Other categories	Other
38320	48.0568	77.9674	-1.6224	0.000677556	N-acyl-L-amino acid amidohydrolase	Amino acid biosynthesis	Glutamate family / Nitrogen assimilation
38370	194.885	119.314	1.63338	0.00080213	N(5)-glutamine methyltransferase	Biosynthesis of cofactors, prosthetic groups, and carriers	Cobalamin, heme, phycobilin and porphyrin
38380	529.414	315.857	1.67612	0.000398325	Tic22-like protein	Other categories	Other
38390	287.172	154.874	1.85423	1.47352e-05	hypothetical protein	Hypothetical
38400	31.9635	20.7636	1.5394	0.00777651	putative translation initiation factor EIF-2b subunit 1	Translation	Protein modification and translation factors
38440	48.9731	21.8926	2.23697	3.26874e-06	two component transcriptional regulator	Regulatory functions
38450	1080.46	2406.58	-2.22737	2.1846e-05	phosphoribulokinase	Photosynthesis and respiration	CO2 fixation
38500	18.7395	9.49796	1.973	6.30649e-05	hypothetical protein	Hypothetical
38510	52.1728	25.7379	2.02708	0.00013409	hypothetical protein	Hypothetical
38570	53.9629	94.242	-1.74642	0.000684626	McyA protein	Other categories	Other
38610	83.1762	136.416	-1.64008	0.00684655	McyE protein	Other categories	Other
38670	108.953	170.026	-1.56054	0.00130199	DNA polymerase III beta subunit	DNA replication, restriction, modification, recombination, and repair
38700	3294.39	1731.17	1.90298	4.7031e-05	hypothetical protein	Hypothetical
38740	9.51403	5.07367	1.87518	0.00197881	hypothetical protein	Hypothetical
38770	1425.75	3058.93	-2.14549	2.84187e-06	unknown protein	Unknown
38820	111.058	72.7458	1.52666	0.00419451	phosphoenolpyruvate carboxylase	Energy metabolism	Pyruvate and acetyl-CoA metabolism
39020	377.909	153.084	2.46864	1.65432e-07	glycine dehydrogenase	Energy metabolism	Amino acids and amines
39060	161.971	309.624	-1.9116	5.92846e-05	single-stranded DNA-binding protein	DNA replication, restriction, modification, recombination, and repair
39080	27.5939	12.0622	2.28763	3.90281e-05	rod shape-determining protein MreC	Other categories	Other
39090	20.0317	14.1404	1.41663	0.0150284	penicillin-binding protein	Other categories	Drug and analog sensitivity
39110	157.812	291.822	-1.84917	1.11513e-05	probable branched-chain amino acid aminotransferase	Amino acid biosynthesis	Branched chain family
39130	27.4375	64.2817	-2.34284	6.65997e-09	circadian clock protein KaiC homolog	Other categories	Other
39160	32.3765	47.3957	-1.46389	0.00577421	DNA polymerase III alpha subunit	DNA replication, restriction, modification, recombination, and repair
39170	12969	21888.8	-1.68778	0.00138612	unknown protein	Unknown
39270	35.3202	65.5349	-1.85545	0.00188921	diamine acetyltransferase 2	Other categories	Other
39300	320.756	135.6	2.36546	8.47241e-10	hypothetical protein	Hypothetical
39640	27.2376	8.03695	3.38905	8.86402e-13	ATP-dependent DNA helicase RecQ	Other categories	Other
39660	334.919	209.672	1.59735	0.000700988	putative metalloprotease	Other categories	Other
39670	240.125	131.739	1.82273	2.20755e-05	diacylglycerol kinase	Fatty acid, phospholipid and sterol metabolism
39690	2554.58	7214.07	-2.82397	4.93383e-13	hypothetical protein	Hypothetical
39700	50.7997	171.873	-3.38335	0	phycocyanin operon protein W	Photosynthesis and respiration	Phycobilisome
39740	373.426	236.452	1.57929	0.00122868	hypothetical protein	Hypothetical
39790	13.4554	20.1888	-1.50042	0.00667015	cation-transporting P-type ATPase PacL	Transport and binding proteins
39820	22.8446	9.96181	2.29322	1.34084e-07	ABC-transporter ATP-binding protein	Transport and binding proteins
39830	37.5685	19.8208	1.89541	3.58448e-05	hypothetical protein	Hypothetical
39930	41.984	19.8168	2.11861	4.05257e-05	hypothetical protein	Hypothetical
39950	112.869	163.373	-1.44746	0.0104174	unknown protein	Unknown
40000	20.3169	52.9076	-2.60412	6.01582e-09	riboflavin biosynthesis protein RibD	Other categories	Other
40010	1785.29	583.595	3.05912	1.11054e-08	ammonium/methylammonium permease	Transport and binding proteins
40150	73.0295	167.444	-2.29283	7.63987e-09	hypothetical protein	Hypothetical
40190	657.777	388.836	1.69166	0.000554149	ParB-like nuclease	Other categories	Other
40200	89.9896	54.324	1.65653	0.000716144	hypothetical protein	Hypothetical
40260	171.756	68.2859	2.51525	7.63526e-10	mannose-1-phosphate guanyltransferase	Energy metabolism	Sugars
40290	960.221	508.833	1.8871	0.00286893	hypothetical protein	Hypothetical
40520	89.9999	44.6493	2.01571	4.87626e-06	hypothetical protein	Hypothetical
40530	2323.88	1136.8	2.04423	1.06956e-06	unknown protein	Unknown
40550	2666.99	5975.9	-2.24069	1.55461e-07	hypothetical protein	Hypothetical
40560	2867.78	5328.87	-1.85819	0.000300032	S-adenosylmethionine decarboxylase proenzyme	Other categories	Other
40900	119.751	79.465	1.50697	0.00311145	putative HlyD family secretion protein	Other categories	Other
41100	74.8293	40.7221	1.83756	0.000671098	urease accessory protein E	Central intermediary metabolism	Other
41130	2238.12	4227.63	-1.88892	1.07385e-05	DNA binding protein HU	Translation	Nucleoproteins
41140	30.4243	51.3032	-1.68626	0.000720678	histidinol-phosphate aminotransferase	Other categories	Other
41170	29.7682	50.1877	-1.68595	0.0143237	biotin/lipoate A/B protein ligase family protein	Other categories	Other
41220	53.9471	105.426	-1.95425	8.12765e-06	probable myo-inositol-1(or 4)-monophosphatase	Other categories	Other
41320	1661.8	2550.79	-1.53496	0.00891164	hypothetical protein	Hypothetical
41340	22.8571	12.9616	1.76345	0.00174422	hypothetical protein	Hypothetical
41350	67.9427	35.1858	1.93097	6.53577e-06	hypothetical protein	Hypothetical
41390	10.0261	16.767	-1.67234	0.0124166	proline hydroxylase-like protein	Other categories	Other
41400	104.218	249.538	-2.39438	6.86031e-09	transketolase, central region	Other categories	Other
41420	84.2646	44.8521	1.87872	9.51013e-06	aldo/keto reductase	Other categories	Other
41450	129.707	80.4007	1.61326	0.0011357	hypothetical protein	Hypothetical
41640	10.5375	19.96	-1.89419	0.000410816	hypothetical protein	Hypothetical
41750	77.1113	23.2993	3.3096	5.49048e-06	hypothetical protein	Hypothetical
41870	1436.09	543.333	2.64311	4.31279e-10	hypothetical protein	Hypothetical
42020	89.1665	37.3081	2.39	1.1868e-09	glycosyl transferase family 2	Other categories	Other
42030	777.61	255.045	3.04891	2.88658e-15	hypothetical protein	Hypothetical
42070	19.1186	12.1521	1.57328	0.00752995	precorrin methylase	Other categories	Other
42080	113.511	65.889	1.72276	9.99477e-05	hypothetical protein	Hypothetical
42190	191.034	289.357	-1.51469	0.0035906	RlpA-like lipoprotein precursor	Other categories	Other
42200	14.7783	61.2997	-4.14795	2.35589e-13	amino acid transport system ATP-binding protein	Transport and binding proteins
42250	42.6209	18.2628	2.33375	8.77799e-08	two-component sensor histidine kinase	Regulatory functions
42320	57.6917	81.7819	-1.41757	0.0145404	hypothetical protein	Hypothetical
42350	82.0197	54.8536	1.49525	0.00355003	peptidase S8 and S53, subtilisin, kexin, sedolisin	Translation	Degradation of proteins, peptides, and glycopeptides
42370	39.5156	21.8435	1.80903	0.00346591	two-component response regulator	Regulatory functions
42380	77.6037	47.4002	1.6372	0.00598737	hypothetical protein	Hypothetical
42390	60.5833	35.1284	1.72462	0.0148389	hypothetical protein	Hypothetical
42400	132.367	71.2998	1.85648	8.17085e-06	hypothetical protein	Hypothetical
42500	420.536	238.087	1.76631	4.31762e-05	hypothetical protein	Hypothetical
42540	378.529	551.661	-1.45738	0.00765941	histidine biosynthesis bifunctional protein HisIE	Amino acid biosynthesis	Aromatic amino acid family
42660	339.91	1003.36	-2.95184	5.52669e-13	ferredoxin I	Photosynthesis and respiration	Soluble electron carriers
42680	52.3195	158.472	-3.02893	2.93099e-14	porphobilinogen deaminase	Biosynthesis of cofactors, prosthetic groups, and carriers	Cobalamin, heme, phycobilin and porphyrin
42720	41.072	86.4543	-2.10494	1.33293e-06	serine/threonine kinase	Regulatory functions
42750	521.699	1186.21	-2.27374	5.3611e-09	30S ribosomal protein S10	Translation	Ribosomal proteins: synthesis and modification
42780	738.999	1288.87	-1.74408	0.000123881	30S ribosomal protein S7	Translation	Ribosomal proteins: synthesis and modification
42790	2090.58	3347.93	-1.60144	0.00270936	30S ribosomal protein S12	Translation	Ribosomal proteins: synthesis and modification
42840	587.279	850.829	-1.44876	0.0114366	hypothetical protein	Hypothetical
42860	75.98	46.2142	1.64408	0.00105132	phospholipid/glycerol acyltransferase	Other categories	Other
42940	141.427	81.1052	1.74375	0.000219403	type 2 NADH dehydrogenase	Other categories	Other
42990	79.6866	144.982	-1.8194	3.82501e-05	hypothetical protein	Hypothetical
43100	9.93049	15.4048	-1.55126	0.00720882	hypothetical protein	Hypothetical
43170	25.8497	51.6272	-1.99721	5.54054e-05	cysteine synthase	Amino acid biosynthesis	Serine family / Sulfur assimilation
43210	15.3682	7.05062	2.17969	0.00118912	sulfatase-modifying factor 1 precursor	Other categories	Other
43290	14.1021	8.16392	1.72737	0.00774743	unknown protein	Unknown
43320	581.76	331.853	1.75307	0.000288766	resolvase-like protein	Other categories	Other
43330	184.581	452.03	-2.44895	3.88104e-10	PhoH like protein	Other categories	Adaptations and atypical conditions
43340	2348.02	6433.74	-2.74007	2.908e-10	50S ribosomal protein L20	Translation	Ribosomal proteins: synthesis and modification
43350	3292.51	10424.3	-3.16606	2.22045e-16	50S ribosomal protein L35	Translation	Ribosomal proteins: synthesis and modification
43410	179.299	42.9019	4.17928	0	hypothetical protein	Hypothetical
43520	30.2873	59.5524	-1.96625	1.46152e-06	ribonucleotide reductase subunit alpha	Purines, pyrimidines, nucleosides, and nucleotides	Purine ribonucleotide biosynthesis
43550	27.3975	57.2427	-2.08934	3.39924e-05	hypothetical protein	Hypothetical
43570	4.35477	13.8779	-3.18683	3.62442e-07	hypothetical protein	Hypothetical
43590	23.3539	12.2367	1.90851	2.99217e-06	hypothetical protein	Hypothetical
43640	182.596	118.951	1.53505	0.00275046	glucose 6-phosphate dehydrogenase	Energy metabolism	Pentose phosphate pathway
43670	1099.55	3451.02	-3.13857	1.86486e-08	phosphoglycerate kinase	Energy metabolism	Glycolysis
43690	3028.51	5833.69	-1.92626	0.000388647	photosystem I subunit XI	Photosynthesis and respiration	Photosystem I
43700	68423.3	107730	-1.57446	0.0017794	photosystem I subunit VIII	Photosynthesis and respiration	Photosystem I
43710	5.10037	9.77464	-1.91646	0.000529563	two-component hybrid sensor and regulator	Regulatory functions
43860	797.562	3705.72	-4.64631	0	unknown protein	Unknown
43870	429.895	2370.83	-5.5149	0	50S ribosomal protein L10	Translation	Ribosomal proteins: synthesis and modification
43880	198.527	1382.52	-6.96389	0	hypothetical protein	Hypothetical
43900	184.311	121.856	1.51253	0.00403822	transcriptional repressor nrdR	Regulatory functions
43910	529.833	2153.73	-4.06492	6.66134e-16	30S ribosomal protein S1	Other categories	Other
43960	13.7681	24.8831	-1.8073	0.00318987	hypothetical protein	Hypothetical
43970	184.049	319.689	-1.73698	7.42738e-05	hypothetical protein	Hypothetical
44180	91.6534	160.141	-1.74725	0.000126355	proline-tRNA ligase	Other categories	Other
44250	756.446	1949.11	-2.57667	3.04544e-08	photosystem II manganese-stabilizing polypeptide	Photosynthesis and respiration	Photosystem II
44300	50.5727	74.6756	-1.4766	0.00531283	phosphoglucomutase/phosphomannomutase	Other categories	Other
44310	47.3359	74.8424	-1.58109	0.00110787	glycolate oxidase Fe-S subunit	Other categories	Other
44320	30.7324	63.2814	-2.05911	1.12277e-06	glycolate oxidase subunit GlcE	Other categories	Other
44340	29.5308	50.6998	-1.71684	0.000383373	putative aminotransferase	Amino acid biosynthesis	Aspartate family
44400	26.3226	74.0335	-2.81255	3.9331e-11	FO synthase subunit 2	Other categories	Other
44410	197.334	640.925	-3.24792	4.44089e-16	Psb29 Photosystem II sub-stoichiometric subunit	Other categories	Other
44430	436.959	312.231	1.39947	0.0152158	hypothetical protein	Hypothetical
44440	389.104	726.387	-1.86682	2.06254e-05	hypothetical protein	Hypothetical
44510	63.7771	90.9038	-1.42534	0.0129113	pyruvate dehydrogenase E1 component, alpha subunit	Energy metabolism	Pyruvate dehydrogenase
44520	654.983	208.803	3.13685	1.04361e-14	hypothetical protein	Hypothetical
44530	156.07	72.0205	2.16702	1.56824e-06	transposase	Other categories	Transposon-related functions
44540	1555.67	747.723	2.08054	0.00120641	unknown protein	Unknown
44590	25.4291	46.4107	-1.8251	9.32447e-05	transposase	Other categories	Transposon-related functions
44650	740.496	482.26	1.53547	0.00226388	hypothetical protein	Hypothetical
44810	286.855	477.312	-1.66395	0.000235543	photosystem I assembly related protein	Photosynthesis and respiration	Photosystem I
44820	508.836	818.384	-1.60835	0.00156992	peptidyl-prolyl cis-trans isomerase B	Translation	Protein modification and translation factors
44840	32.5138	67.6793	-2.08156	1.1098e-06	beta ketoacyl-acyl carrier protein synthase	Other categories	Other
44850	4.6642	8.10788	-1.73832	0.00572943	DNA primase	DNA replication, restriction, modification, recombination, and repair
44890	3073.95	4727.85	-1.53804	0.00396582	hypothetical protein	Hypothetical
44910	83.4275	119.425	-1.43148	0.0110327	hypothetical protein	Hypothetical
44930	401.991	1392.86	-3.4649	1.9984e-15	30S ribosomal protein S2	Translation	Ribosomal proteins: synthesis and modification
44940	500.335	1082.74	-2.16403	5.23683e-07	elongation factor TS	Translation	Protein modification and translation factors
44950	11.346	42.3534	-3.73289	4.44089e-16	squalene-hopene-cyclase	Fatty acid, phospholipid and sterol metabolism
45060	82.0467	123.059	-1.49987	0.00327813	homoserine dehydrogenase	Amino acid biosynthesis	Aspartate family
45220	203.938	372.027	-1.82422	0.00026836	urease gamma subunit	Central intermediary metabolism	Other
45230	123.701	262.162	-2.11932	1.45961e-05	urease beta subunit	Central intermediary metabolism	Other
45250	150.406	57.7456	2.60463	7.32325e-12	group 2 RNA polymerase sigma factor SigD	Transcription	RNA synthesis, modification, and DNA transcription
45310	76.8458	134.027	-1.7441	0.00738388	ferredoxin	Photosynthesis and respiration	Soluble electron carriers
45370	108.445	42.6711	2.54142	0.00348325	hypothetical protein	Hypothetical
45610	100.422	160.781	-1.60105	0.000681435	heterodisulfide reductase subunit B	Other categories	Other
45630	1705.22	692.87	2.4611	2.70985e-10	anti-sigma-factor antagonist	Transcription	RNA synthesis, modification, and DNA transcription
45710	3950.15	1400.05	2.82143	1.68772e-09	16.6 kDa small heat shock protein HspA	Cellular processes	Chaperones
45760	88.5449	31.3948	2.82037	1.22347e-13	hypothetical protein	Hypothetical
45780	54.7062	81.9363	-1.49775	0.00340278	magnesium protoporphyrin IX chelatase subunit D	Biosynthesis of cofactors, prosthetic groups, and carriers	Cobalamin, heme, phycobilin and porphyrin
45790	168.923	357.414	-2.11584	1.17538e-07	hypothetical protein	Hypothetical
45800	209.134	343.665	-1.64328	0.00041568	hypothetical protein	Hypothetical
45820	57.1119	123.525	-2.16286	2.86273e-05	hypothetical protein	Hypothetical
45830	27.27	46.3559	-1.69989	0.00426954	4-diphosphocytidyl-2C-methyl-D-erythritol synthase	Other categories	Other
45860	19.0855	41.1025	-2.1536	2.35504e-05	1,4-dihydroxy-2-naphthoate synthase	Biosynthesis of cofactors, prosthetic groups, and carriers	Menaquinone and ubiquinone
45870	327.261	612.023	-1.87014	3.63992e-05	RNA-binding region protein	Translation	Nucleoproteins
45880	38.705	76.9716	-1.98867	5.73639e-05	hypothetical protein	Hypothetical
45890	8.50707	1.66877	5.09781	0.00354508	pentapeptide repeat containing protein	Other categories	Other
45950	20.1743	47.8624	-2.37244	3.05256e-08	amidase	Cell envelope	Murein sacculus and peptidoglycan
45960	59.5588	32.2451	1.84707	9.32972e-06	ABC-transporter ATP-binding protein	Transport and binding proteins
46020	343.076	773.727	-2.25526	7.81314e-09	site-specific recombinase	Other categories	Other
46030	199.47	485.46	-2.43375	3.41587e-08	thioredoxin	Other categories	Other
46040	98.1724	213.767	-2.17747	2.6671e-05	hypothetical protein	Hypothetical
46050	102.572	173.558	-1.69206	0.000331976	CP12 polypeptide	Other categories	Other
46070	2054.07	3896.38	-1.89691	1.72858e-05	10 kDa chaperonin	Cellular processes	Chaperones
46080	1058.88	1726.12	-1.63014	0.0164791	60 kDa chaperonin	Cellular processes	Chaperones
46190	271.458	25.6546	10.5813	0	cation transporter	Transport and binding proteins
46200	882.073	125.07	7.05263	1.4353e-08	unknown protein	Unknown
46220	34.3341	55.8453	-1.62653	0.00984064	hypothetical protein	Hypothetical
46230	3500.25	5986.87	-1.71041	0.00406504	allophycocyanin-B	Photosynthesis and respiration	Phycobilisome
46250	158.226	101.073	1.56546	0.00118316	erthyrocyte band 7 integral membrane protein	Other categories	Other
46270	14.5305	7.86299	1.84796	0.000856292	D-alanyl-D-alanine carboxypeptidase/D-alanyl-D-alanine-endopeptidase	Other categories	Other
46340	75326.5	115118	-1.52825	0.00310356	cytochrome b6-f complex subunit 5	Photosynthesis and respiration	Cytochrome b6/f complex
46380	5.90045	2.40161	2.45687	0.000133897	unknown protein	Unknown
46390	28.966	12.5268	2.31232	1.28782e-06	NAD-dependent epimerase/dehydratase	Other categories	Other
46400	24.3016	15.5946	1.55833	0.00682816	glycosyl transferase family 2	Other categories	Other
46420	28.3802	11.9228	2.38033	3.8032e-08	glycosyl transferase family 39	Other categories	Other
46460	58.1256	144.084	-2.47884	1.00778e-10	aminotransferase	Other categories	Other
46480	93.4882	143.893	-1.53916	0.00184448	NAD-dependent epimerase/dehydratase	Translation	Nucleoproteins
46510	42.5498	21.8884	1.94394	0.00282945	hypothetical protein	Hypothetical
46550	41.2455	20.7223	1.99039	0.000972372	pilin polypeptide PilA	Cellular processes	Chemotaxis
46620	42.4421	88.0483	-2.07455	2.02376e-06	magnesium-protoporphyrin IX monomethylester aerobic cyclization protein homolog	Other categories	Other
46640	94.1468	199.626	-2.12037	2.81136e-07	molybdopterin binding oxidoreductase	Other categories	Other
46710	28.1316	8.33455	3.3753	4.6073e-06	protein of unknown function DUF820	Other categories	Other
46720	15.9775	7.05825	2.26366	0.00563283	protein of unknown function DUF820	Other categories	Other
46740	2.80416	15.5633	-5.55008	2.00398e-07	methylenetetrahydrofolate dehydrogenase (NADP+)	Biosynthesis of cofactors, prosthetic groups, and carriers	Folic acid
46780	299.219	131.518	2.27512	2.19411e-08	periplasmic carboxyl-terminal protease	Translation	Degradation of proteins, peptides, and glycopeptides
46790	225.664	154.87	1.45712	0.00674074	recombination protein RecR	DNA replication, restriction, modification, recombination, and repair
46880	104.987	164.192	-1.56393	0.0018842	ribonuclease II	Transcription	Degradation of RNA
47010	3130.52	1112.3	2.81446	2.91678e-12	unknown protein	Unknown
47020	239.755	485.013	-2.02295	4.17769e-07	soluble inorganic pyrophosphatase	Central intermediary metabolism	Phosphorus compounds
47030	32.0391	50.41	-1.57339	0.00899637	putative N-acetylmannosamine-6-phosphate 2-epimerase	Other categories	Other
47100	34.2024	52.2224	-1.52686	0.00766566	arginase	Energy metabolism	Amino acids and amines
47270	85.9204	29.9218	2.8715	3.69615e-12	uroporphyrin-III C-methyltransferase	Biosynthesis of cofactors, prosthetic groups, and carriers	Cobalamin, heme, phycobilin and porphyrin
47280	181.33	71.9956	2.51863	5.09749e-09	protein of unknown function UPF0047	Other categories	Other
47290	4322.94	13091.8	-3.02845	1.5033e-07	photosystem I subunit III PsaF	Photosynthesis and respiration	Photosystem I
47300	33812.4	93812.3	-2.77449	6.90748e-10	photosystem I subunit IX	Photosynthesis and respiration	Photosystem I
47310	38.4053	76.1327	-1.98235	1.12503e-06	hypothetical protein	Hypothetical
47330	249.314	82.0485	3.03862	0.000265564	hypothetical protein	Hypothetical
47500	119.874	391.444	-3.26546	7.26086e-14	hypothetical protein	Hypothetical
47620	1.61185	3.04379	-1.88838	0.016095	hypothetical protein	Hypothetical
47870	5224.34	16504.1	-3.15908	5.85509e-10	ribulose bisphosphate carboxylase small subunit	Photosynthesis and respiration	CO2 fixation
47880	4049.33	11478.3	-2.83462	3.73884e-08	possible Rubisco chaperonin	Other categories	Other
47890	2184.68	6091.84	-2.78844	2.94005e-05	ribulose bisphosphate carboxylase large subunit	Photosynthesis and respiration	CO2 fixation
47900	270.467	522.85	-1.93314	4.42177e-06	carbon dioxide concentrating mechanism protein CcmN	Photosynthesis and respiration	CO2 fixation
47920	773.438	1662.95	-2.15008	5.4273e-08	carbon dioxide concentrating mechanism protein CcmL	Photosynthesis and respiration	CO2 fixation
47930	1516.11	2164.39	-1.42759	0.0143678	carbon dioxide concentrating mechanism protein CcmK	Photosynthesis and respiration	CO2 fixation
47940	1345.66	3407.63	-2.53231	2.51747e-10	carbon dioxide concentrating mechanism protein CcmK	Photosynthesis and respiration	CO2 fixation
47950	1814.98	3765.74	-2.07481	2.73074e-07	hypothetical protein	Hypothetical
47980	68.638	41.1542	1.66782	0.0119962	hypothetical protein	Hypothetical
48040	3016.06	6601.39	-2.18875	4.0031e-08	50S ribosomal protein L33	Translation	Ribosomal proteins: synthesis and modification
48050	698.713	1392.87	-1.99348	2.41021e-05	30S ribosomal protein S18	Translation	Ribosomal proteins: synthesis and modification
48070	180.167	101.544	1.77428	0.000132707	two-component sensor histidine kinase	Regulatory functions
48140	30.5005	59.8379	-1.96187	2.23564e-05	hemolysin-type calcium-binding region protein	Other categories	Other
48150	87.5452	217.009	-2.47882	2.27038e-09	CDP-diacylglycerol-glycerol-3-phosphate 3-phosphatidyltransferase (EC 2.7.8.5)	Fatty acid, phospholipid and sterol metabolism
48160	127.668	387.018	-3.03144	8.65974e-15	delta 6 acyl-lipid desaturase	Fatty acid, phospholipid and sterol metabolism
48260	27.5668	44.7818	-1.62448	0.00163837	L-cysteine/cystine lyase	Other categories	Other
48280	1522.13	951.676	1.59942	0.000921543	hypothetical protein	Hypothetical
48340	1840.86	3680.84	-1.99952	0.000322305	phycobilisome rod-core linker polypeptide	Photosynthesis and respiration	Phycobilisome
48380	348.747	906.82	-2.60022	4.45663e-10	universal stress protein	Other categories	Other
48390	2000.72	4488.37	-2.24338	4.46239e-07	unknown protein	Unknown
48440	19.8201	61.7156	-3.11379	0.000100662	unknown protein	Unknown
48620	163.099	64.1413	2.54281	0.0026888	hypothetical protein	Hypothetical
48630	933.909	2364.99	-2.53236	1.48991e-08	hypothetical protein	Hypothetical
48640	597.476	1913.28	-3.20227	3.52962e-12	hypothetical protein	Hypothetical
48710	17.9606	30.7784	-1.71366	0.00086278	thiophen and furan oxidation protein	Cellular processes	Detoxification
48830	109.226	46.4917	2.34937	7.84521e-10	cytochrome P450	Fatty acid, phospholipid and sterol metabolism
48840	37.3838	18.2644	2.04681	4.74484e-07	hypothetical protein	Hypothetical
48880	83.2217	241.291	-2.89938	2.79776e-14	magnesium protoporphyrin IX chelatase subunit I	Biosynthesis of cofactors, prosthetic groups, and carriers	Cobalamin, heme, phycobilin and porphyrin
48900	80.009	112.375	-1.40453	0.0156685	glycyl-tRNA synthetase beta chain	Translation	Aminoacyl tRNA synthetases and tRNA modification
48920	85.2942	28.4211	3.00109	1.31006e-14	protein of unknown function DUF482	Other categories	Other
48940	53.399	26.5256	2.01311	5.4301e-07	two-component sensor histidine kinase	Regulatory functions
48970	160.89	389.278	-2.41953	6.77295e-10	universal stress protein	Other categories	Other
48980	82.8577	167.1	-2.01671	0.00138548	leader peptidase I	Cellular processes	Protein and peptide secretion
48990	71.3969	147.461	-2.06537	5.31379e-05	MazG protein homolog	Regulatory functions
49000	1038.49	5057.08	-4.86965	0	hypothetical protein	Hypothetical
49110	4.53682	2.00451	2.26331	0.00670741	unknown protein	Unknown
49220	236.106	142.927	1.65193	0.00102382	RNA polymerase ECF-type (group 3) sigma-E factor	Transcription	RNA synthesis, modification, and DNA transcription
49240	47.9278	21.42	2.23753	0.000223266	hypothetical protein	Hypothetical
49250	154.729	268.206	-1.73339	0.000102395	sulfolipid biosynthesis protein	Fatty acid, phospholipid and sterol metabolism
49370	604.847	1343.17	-2.22068	0.000240511	phycobilisome core-membrane linker polypeptide	Photosynthesis and respiration	Phycobilisome
49400	12.7954	6.54164	1.95599	0.00305577	unknown protein	Unknown
49470	208.011	112.116	1.85532	9.30321e-06	uncharacterized zinc-type alcohol dehydrogenase-like protein	Other categories	Other
49490	1443.24	27806.7	-19.2669	0	glutamine synthetase inactivating factor IF7	Other categories	Other
49510	59.0455	25.1116	2.35132	1.72469e-06	hypothetical protein	Hypothetical
49840	13.1909	6.4634	2.04086	0.0115123	hypothetical protein	Hypothetical
49870	10.4031	1.44049	7.22192	0.0026677	hypothetical protein	Hypothetical
49930	322.975	33.5007	9.64084	1.73506e-06	hypothetical protein	Hypothetical
49940	44.6515	14.1388	3.15808	9.02844e-11	P-loop containing nucleoside triphosphate hydrolase superfamily	Other categories	Other
50020	1274.61	2314.99	-1.81623	0.00261348	geranylgeranyl hydrogenase	Biosynthesis of cofactors, prosthetic groups, and carriers	Cobalamin, heme, phycobilin and porphyrin
50060	37.5595	65.9486	-1.75584	0.000104622	PHA-specific beta-ketothiolase PhaA	Fatty acid, phospholipid and sterol metabolism
50080	265.534	675.062	-2.54228	6.26152e-11	photosystem II extrinsic protein PsbQ	Photosynthesis and respiration	Photosystem II
50130	824.521	1175.15	-1.42525	0.0156683	ATP synthase subunit b'	Photosynthesis and respiration	ATP synthase
50140	345.099	531.737	-1.54082	0.00286327	ATP synthase CF0 B chain AtpF	Photosynthesis and respiration	ATP synthase
50170	551.156	984.51	-1.78626	0.000404593	ATP synthase CF1 gamma chain AtpC	Photosynthesis and respiration	ATP synthase
50180	28.7094	56.1155	-1.9546	0.000175315	putative calcium binding hemolysin protein	Other categories	Other
50220	32.853	52.4502	-1.59651	0.000861433	Na-Ca exchanger/integrin-beta4 like	Transport and binding proteins
50240	173.265	70.1479	2.47	3.01374e-10	alkaline phosphatase-like protein	Other categories	Other
50360	96.3936	37.8658	2.54566	2.52192e-11	hypothetical protein	Hypothetical
50410	195.088	54.0029	3.61255	0	adenosine/AMP deaminase	Other categories	Other
50440	591.447	1255.23	-2.1223	0.000244509	twin-arginine translocation protein like	Other categories	Other
50450	194.543	387.078	-1.98968	4.99009e-06	dihydrolipoamide dehydrogenase	Energy metabolism	Pyruvate dehydrogenase
50490	99.0422	36.9532	2.68021	1.44846e-08	phosphoglycolate phosphatase	Energy metabolism	Glycolate pathway
50590	109.085	63.8125	1.70946	0.000124499	hypothetical protein YCF45	Hypothetical
50600	34.0475	22.1801	1.53505	0.00813507	4Fe-4S ferredoxin, iron-sulfur binding protein	Other categories	Other
50640	358.614	628.98	-1.75392	6.36599e-05	hypothetical protein	Hypothetical
50680	26.1005	103.928	-3.98184	0	ribosomal protein L11 methyltransferase	Translation	Ribosomal proteins: synthesis and modification
50690	95.6374	250.804	-2.62245	1.65268e-11	D-3-phosphoglycerate dehydrogenase	Amino acid biosynthesis	Serine family / Sulfur assimilation
50700	1491.19	621.78	2.39826	1.69256e-05	acetohydroxy acid synthase	Other categories	Other
50880	7.77085	3.55493	2.18594	3.21921e-06	hypothetical protein	Hypothetical
51120	30.7476	51.262	-1.66719	0.00435053	haloacid dehalogenase-like hydrolase	Other categories	Other
51130	257.84	447.133	-1.73415	0.000105743	nitrilase homolog	Amino acid biosynthesis	Glutamate family / Nitrogen assimilation
51140	284.618	750.2	-2.63581	3.03177e-11	unknown protein	Unknown
51160	855.56	2160.91	-2.52573	1.44865e-08	unknown protein	Unknown
51170	37.6404	56.3554	-1.49721	0.00601173	polyA polymerase	Translation	Ribosomal proteins: synthesis and modification
51180	882.617	250.105	3.52899	3.55271e-15	hypothetical protein YCF34	Hypothetical
51190	150.846	33.2592	4.53547	4.03713e-06	hypothetical protein	Hypothetical
51200	483.27	124.832	3.87136	0.0138634	hypothetical protein	Hypothetical
51240	13.7258	7.42823	1.84779	0.00848824	tetrapyrrole methylase family protein	Other categories	Other
51310	186.655	486.028	-2.60388	0.00037836	hypothetical protein	Hypothetical
51320	173.093	319.539	-1.84605	0.000191675	hypothetical protein	Hypothetical
51340	546.941	320.687	1.70553	0.000198262	hypothetical protein	Hypothetical
51420	431.503	237.335	1.81812	3.52106e-05	hypothetical protein	Hypothetical
51570	347.655	217.303	1.59986	0.0128771	hypothetical protein	Hypothetical
51610	13.3884	21.8676	-1.63332	0.00751216	sulfate transport system substrate-binding protein	Transport and binding proteins
51630	13.539	32.2229	-2.38001	0.00746236	hypothetical protein	Hypothetical
51640	2.69668	14.6304	-5.42534	3.69405e-05	PA-phosphatase related phosphoesterase	Other categories	Other
51650	22.3554	40.7398	-1.82237	0.000331704	putative thiosulfate sulfurtransferase precursor	Other categories	Other
51820	346.471	121.465	2.85243	6.35048e-13	O-acetylhomoserine/O-acetylserine sulfhydrylase	Other categories	Other
51840	1796.06	693.166	2.5911	3.56234e-09	O-acetylhomoserine/O-acetylserine sulfhydrylase	Other categories	Other
51850	14.753	6.45756	2.28461	0.000811885	band 7 protein like	Other categories	Other
51870	318.301	197.056	1.61528	0.00968621	hypothetical protein	Hypothetical
51950	2.04163	8.0962	-3.96556	0.00249284	cadmium resistance transporter	Other categories	Other
51980	89.1322	36.1103	2.46833	1.55898e-10	putative phosphatidylserine decarboxylase	Other categories	Other
52050	48.8174	20.8168	2.3451	0.00068883	hypothetical protein	Hypothetical
52130	176.038	345.202	-1.96095	1.24252e-05	hypothetical protein	Hypothetical
52150	1481.05	937.179	1.58033	0.00578912	hypothetical protein YCF35	Hypothetical
52260	381.133	894.789	-2.34771	1.53457e-07	NADH dehydrogenase subunit 7	Photosynthesis and respiration	NADH dehydrogenase
52320	77.7897	158.017	-2.03134	4.94668e-07	phosphoglucomutase	Other categories	Other
52430	114.124	49.0087	2.32865	0.00455801	unknown protein	Unknown
52440	78.529	41.4156	1.89612	0.00631847	abortive infection protein like	Other categories	Other
52450	1426.27	592.505	2.40719	4.12968e-07	ATP-dependent Clp protease adaptor protein ClpS	Other categories	Other
52490	907.923	2243.78	-2.47133	8.39202e-10	50S ribosomal protein L31	Translation	Ribosomal proteins: synthesis and modification
52500	135.543	597.428	-4.40766	0	30S ribosomal protein S9	Translation	Ribosomal proteins: synthesis and modification
52510	397.868	1022.07	-2.56887	1.96969e-11	50S ribosomal protein L13	Translation	Ribosomal proteins: synthesis and modification
52520	434.34	1072.57	-2.46942	5.59651e-09	tRNA pseudouridine synthase 1	Translation	Aminoacyl tRNA synthetases and tRNA modification
52530	874.994	1970.92	-2.2525	9.95127e-09	50S ribosomal protein L17	Translation	Ribosomal proteins: synthesis and modification
52540	870.664	1950.11	-2.2398	5.12995e-06	RNA polymerase alpha subunit	Transcription	RNA synthesis, modification, and DNA transcription
52550	798.679	1882.16	-2.35659	2.19906e-09	30S ribosomal protein S11	Translation	Ribosomal proteins: synthesis and modification
52560	1079.06	3239.47	-3.00212	2.20712e-13	30S ribosomal protein S13	Translation	Ribosomal proteins: synthesis and modification
52570	2466.3	5281.15	-2.14133	7.64207e-07	hypothetical protein	Hypothetical
52610	66.7211	45.3361	1.4717	0.0108056	hypothetical protein	Hypothetical
52630	95.458	59.2453	1.61123	0.000926617	creatininase	Other categories	Other
52660	215.707	101.583	2.12346	6.36347e-08	phosphate transport system regulatory protein PhoU	Regulatory functions
52680	534.597	824.741	-1.54273	0.00204938	NADH dehydrogenase I subunit N	Other categories	Other
52690	117.65	188.836	-1.60507	0.000787	glutamyl-tRNA synthetase	Translation	Aminoacyl tRNA synthetases and tRNA modification
52710	50.3534	96.3593	-1.91366	6.24834e-06	phosphofructokinase	Energy metabolism	Glycolysis
52760	13.5914	4.49245	3.02539	1.04492e-06	hypothetical protein	Hypothetical
52770	58.818	38.8021	1.51585	0.00716719	hypothetical protein	Other categories	Other
52850	79.1182	123.565	-1.56178	0.0131088	cyclic nucleotide-binding domain like	Other categories	Other
52890	28.087	19.6077	1.43245	0.010646	primosomal protein N'	DNA replication, restriction, modification, recombination, and repair
52900	93.5342	59.5059	1.57185	0.00117382	group 2 RNA polymerase sigma factor SigE	Transcription	RNA synthesis, modification, and DNA transcription
52920	209.454	132.512	1.58064	0.00101323	group 3 RNA polymerase sigma factor SigF	Transcription	RNA synthesis, modification, and DNA transcription
52970	24.6068	36.4221	-1.48016	0.0149716	hypothetical protein	Hypothetical
52980	16.9696	30.7767	-1.81364	0.00134775	ribonuclease H like	Transcription	Degradation of RNA
53130	72.21	156.231	-2.16356	3.0463e-08	3-isopropylmalate dehydratase large subunit	Amino acid biosynthesis	Branched chain family
53160	9.40757	24.4476	-2.59872	0.0166438	hypothetical protein	Hypothetical
53230	83.1115	46.9866	1.76883	7.14519e-05	D-alanyl-D-alanine carboxypeptidase	Other categories	Other
53380	1591.61	2989.44	-1.87825	9.33751e-06	30S ribosomal protein S14	Translation	Ribosomal proteins: synthesis and modification
53390	330.114	604.925	-1.83247	0.000519439	polyribonucleotide nucleotidyltransferase	Transcription	RNA synthesis, modification, and DNA transcription
53410	77.6886	134.03	-1.72522	8.56224e-05	peptide chain release factor 1	Translation	Protein modification and translation factors
53430	40.1069	83.2059	-2.0746	4.75223e-07	arginine biosynthesis bifunctional protein ArgJ	Amino acid biosynthesis	Glutamate family / Nitrogen assimilation
53470	7.05461	1.51709	4.65009	0.0014177	cellulose synthase	Other categories	Other
53500	97.6234	50.9079	1.91765	0.00130976	hypothetical protein	Hypothetical
53520	27.1195	14.3679	1.88751	4.79612e-05	UDP-N-acetylmuramoylalanyl-D-glutamate--2,6-diaminopimelate ligase	Other categories	Other
53540	174.224	258.611	-1.48436	0.0056228	transposase	Other categories	Transposon-related functions
53550	40.8103	13.2974	3.06904	7.26086e-14	serine/threonine protein kinase	Regulatory functions
53570	351.075	522.92	-1.48948	0.0085453	delta 12 acyl-lipid desaturase	Other categories	Other
53650	65.5032	43.7684	1.49659	0.00361004	peptidase M50	Other categories	Other
53690	273.427	155.151	1.76233	8.49245e-05	hypothetical protein	Hypothetical
53700	12.0873	20.0836	-1.66155	0.0105805	33 kDa chaperonin	Cellular processes	Chaperones
53740	20.1	31.3802	-1.5612	0.00346392	exopolyphosphatase	Central intermediary metabolism	Phosphorus compounds
53760	22.8106	41.2541	-1.80855	0.000186737	hypothetical protein	Hypothetical
53770	170.199	497.958	-2.92574	4.6208e-10	hypothetical protein	Hypothetical
53840	503.47	99.1309	5.07884	0	unknown protein	Unknown
53860	311.514	694.781	-2.23034	1.0851e-06	light-independent protochlorophyllide reductase subunit ChlB	Biosynthesis of cofactors, prosthetic groups, and carriers	Cobalamin, heme, phycobilin and porphyrin
53890	37.8976	62.2797	-1.64337	0.00145497	lipoic acid synthetase	Biosynthesis of cofactors, prosthetic groups, and carriers	Lipoate
53930	9.99143	6.15067	1.62445	0.00757563	DNA polymerase III gamma/tau subunit	DNA replication, restriction, modification, recombination, and repair
53960	384.158	25.7715	14.9063	0	ferredoxin-nitrate reductase	Amino acid biosynthesis	Glutamate family / Nitrogen assimilation
53980	103.413	67.9632	1.5216	0.00303566	alpha/beta fold family hydrolase	Other categories	Other
54000	8849.58	13489	-1.52425	0.00310495	photosystem II reaction center protein H	Photosynthesis and respiration	Photosystem II
54080	37.599	53.5374	-1.4239	0.0109893	hypothetical protein	Hypothetical
54140	23.49	10.0186	2.34464	2.31335e-06	hypothetical protein	Hypothetical
54200	57.4298	26.8251	2.1409	0.00488298	hypothetical protein	Hypothetical
54230	97.8811	62.2017	1.57361	0.00520161	unknown protein	Unknown
54350	22.5109	33.4899	-1.48772	0.0087873	pantothenate synthetase/cytidylate kinase	Biosynthesis of cofactors, prosthetic groups, and carriers	Pantothenate
54390	466.233	1347.11	-2.88935	5.9508e-14	photosystem II reaction center 13 kDa protein	Photosynthesis and respiration	Photosystem II
54440	16.5795	8.54911	1.93932	0.000140096	FAD dependent oxidoreductase	Other categories	Other
54450	152.475	67.2241	2.26816	3.65533e-06	hypothetical protein	Hypothetical
54470	1650.19	577.39	2.85802	2.10014e-08	principal RNA polymerase sigma factor SigA	Other categories	Other
54480	3780.84	5974.16	-1.58011	0.00308498	30S ribosomal protein S20	Translation	Ribosomal proteins: synthesis and modification
54490	452.93	666.28	-1.47104	0.00967113	deoxyribonuclease	Other categories	Other
54520	151.939	236.88	-1.55905	0.00908814	RNA polymerase beta prime subunit	Transcription	RNA synthesis, modification, and DNA transcription
54540	144.177	90.7538	1.58866	0.000866426	PpiC-type peptidyl-prolyl cis-trans isomerase	Other categories	Other
54550	119.65	70.9374	1.6867	0.0003934	ABC-transporter ATP-binding protein	Transport and binding proteins
54560	145.29	85.7805	1.69374	0.00118077	hemolysin secretion protein	Cellular processes	Cell killing
54580	355.29	132.893	2.6735	1.52696e-08	transcriptional regulator	Regulatory functions
54830	35.2664	24.233	1.4553	0.00856807	hypothetical protein	Hypothetical
54840	3498.46	1673.58	2.09041	1.93677e-06	hypothetical protein	Hypothetical
54850	304.64	502.542	-1.64963	0.00101113	inosine-5'-monophosphate dehydrogenase (EC 1.1.1.205)	Purines, pyrimidines, nucleosides, and nucleotides	Purine ribonucleotide biosynthesis
55010	46.901	5.62804	8.33345	1.00834e-06	tetratricopeptide TPR_2	Other categories	Other
55020	222.305	20.767	10.7047	0.00457021	unknown protein	Unknown
55030	12.9747	0.76085	17.0529	0.000107073	tetratricopeptide TPR_2	Other categories	Other
55070	46.0037	6.13691	7.49623	3.88578e-13	tetratricopeptide TPR_2	Other categories	Other
55090	172.438	90.8489	1.89807	4.60124e-05	death on curing protein	Other categories	Other
55100	723.231	384.289	1.882	0.000188132	transcriptional regulator/antitoxin MazE	Regulatory functions
55190	35.5708	73.5385	-2.06738	0.000218401	pentapeptide repeat family protein	Other categories	Other
55260	5181.48	2661.75	1.94664	1.97524e-06	hypothetical protein	Hypothetical
55340	35.8628	19.8606	1.80573	0.00779622	unknown protein	Unknown
55360	148.596	100.923	1.47237	0.00519174	phosphatidate cytidylyltransferase	Fatty acid, phospholipid and sterol metabolism
55390	595.829	1426.47	-2.39409	4.49348e-10	carbon dioxide concentrating mechanism protein CcmK	Photosynthesis and respiration	CO2 fixation
55400	101.883	479.49	-4.70628	0	carbon dioxide concentrating mechanism protein CcmK	Photosynthesis and respiration	CO2 fixation
55440	101.075	51.9302	1.94636	1.53863e-06	pyruvate kinase	Energy metabolism	Glycolysis
55580	148.278	97.1815	1.52578	0.00344698	N-acetylmuramoyl-L-alanine amidase	Cell envelope	Murein sacculus and peptidoglycan
55640	55.8789	18.1246	3.08304	1.63647e-12	transposase	Other categories	Transposon-related functions
55650	31.1929	13.8424	2.25343	5.50494e-06	hypothetical protein	Hypothetical
55670	28.9772	18.0274	1.6074	0.00473844	GHMP kinase	Other categories	Other
55680	119.239	57.6111	2.06972	8.18439e-07	phosphoheptose isomerase	Cell envelope	Surface polysaccharides, lipopolysaccharides and antigens
55750	103.692	35.3417	2.93398	0.000364512	hypothetical protein	Hypothetical
55840	317.993	159.774	1.99027	0.0100549	hypothetical protein	Hypothetical
55850	518.089	109.395	4.73595	7.9714e-14	hypothetical protein	Hypothetical
55860	815.952	138.15	5.90628	0	hypothetical protein	Hypothetical
55870	128.742	204.482	-1.58831	0.00597669	Fe-S-cluster oxidoreductase-like	Other categories	Other
55910	1285.95	798.21	1.61104	0.00225255	hypothetical protein YCF50	Hypothetical
55950	388.59	645.512	-1.66116	0.00270618	NAD(P)H-quinone oxidoreductase chain 2	Photosynthesis and respiration	NADH dehydrogenase
55990	17.5663	49.3582	-2.80982	1.5456e-09	GTP-binding protein	Other categories	Other
56010	100.437	60.212	1.66806	0.000307984	elongation factor EF-G	Translation	Protein modification and translation factors
56070	168.187	83.1751	2.02208	6.9882e-05	FdxN element excision controlling factor protein like	Other categories	Other
56080	32.3676	7.95361	4.06955	0.000112676	FdxN element excision controlling factor protein like	Other categories	Other
56120	189.755	75.955	2.49826	0.0082124	hypothetical protein	Hypothetical
56180	132.533	51.69	2.564	0.00321108	hypothetical protein	Hypothetical
56240	21.3057	11.3079	1.88414	1.15336e-05	tetratricopeptide repeat protein 28 like	Other categories	Other
56280	181.97	3968.87	-21.8106	0	cytochrome c553	Photosynthesis and respiration	Soluble electron carriers
56290	41.3245	77.6983	-1.8802	6.36868e-06	hypothetical protein	Hypothetical
56330	100.977	176	-1.74297	0.000133116	anti-ECFsigma factor like	Other categories	Other
56350	234.503	437.247	-1.86457	1.80063e-05	hypothetical protein	Hypothetical
56380	88.6482	44.4663	1.9936	8.85897e-07	serine protease do-like precursor	Translation	Degradation of proteins, peptides, and glycopeptides
56420	896.201	1270.05	-1.41715	0.0114625	NADH dehydrogenase subunit 4L	Photosynthesis and respiration	NADH dehydrogenase
56450	395.489	616.976	-1.56003	0.0046954	NADH dehydrogenase subunit H	Photosynthesis and respiration	NADH dehydrogenase
56460	70.848	108.103	-1.52584	0.00651057	orotate phosphoribosyltransferase	Purines, pyrimidines, nucleosides, and nucleotides	Pyrimidine ribonucleotide biosynthesis
56470	197.081	90.6688	2.17364	2.28306e-07	porin type major outer membrane protein like	Cell envelope	Membranes, lipoproteins, and porins
56510	50.418	80.6294	-1.59922	0.0021012	3-oxoacyl-[acyl-carrier-protein] reductase like	Other categories	Other
56630	47.1463	22.4186	2.103	1.16384e-07	DNA topoisomerase I	DNA replication, restriction, modification, recombination, and repair
56680	68.1167	161.275	-2.36763	1.46806e-09	iron transport system substrate-binding protein	Other categories	Other
56720	22.4397	12.9122	1.73787	0.0054848	creatininase	Other categories	Other
56740	231.095	827.607	-3.58124	0	nucleoside diphosphate kinase	Purines, pyrimidines, nucleosides, and nucleotides	Interconversions and salvage of nucleosides and nucleotides
56760	194.365	407.292	-2.0955	3.23999e-07	radical S-adenosylmethionine superfamily protein	Other categories	Other
56790	322.681	808.433	-2.50536	5.35967e-11	hypothetical protein	Hypothetical
56800	36.1071	21.7389	1.66094	0.00620124	PBS lyase heat-like repeat	Other categories	Other
56890	19.3513	30.8943	-1.5965	0.00895696	oligopeptides ABC-transporter permease protein	Other categories	Other
56900	21.3966	36.8302	-1.72131	0.00104055	hypothetical protein	Hypothetical
56910	6.51937	13.689	-2.09974	0.000861179	zinc-containing alcohol dehydrogenase superfamily	Other categories	Other
56920	26.8855	78.7353	-2.92854	3.96963e-08	acetyl-CoA carboxylase biotin carboxyl carrier protein	Fatty acid, phospholipid and sterol metabolism
56930	196.355	656.518	-3.34353	0	elongation factor P	Translation	Protein modification and translation factors
57100	101.734	63.0849	1.61265	0.00103062	hypothetical protein	Hypothetical
57130	61.716	127.981	-2.07371	6.41823e-05	hypothetical protein	Hypothetical
57240	485.378	1119.1	-2.30563	1.13378e-08	adenylate kinase	Purines, pyrimidines, nucleosides, and nucleotides	Purine ribonucleotide biosynthesis
57250	828.423	1326.52	-1.60126	0.0106461	preprotein translocase SecY subunit	Cellular processes	Protein and peptide secretion
57260	218.348	1183.57	-5.42057	0	50S ribosomal protein L15	Translation	Ribosomal proteins: synthesis and modification
57270	117.273	867.995	-7.40149	0	30S ribosomal protein S5	Translation	Ribosomal proteins: synthesis and modification
57280	234.876	1490.65	-6.34654	0	50S ribosomal protein L18	Translation	Ribosomal proteins: synthesis and modification
57290	244.185	1315.69	-5.38809	0	50S ribosomal protein L6	Translation	Ribosomal proteins: synthesis and modification
57300	388.871	1768.31	-4.54729	0	30S ribosomal protein S8	Translation	Ribosomal proteins: synthesis and modification
57310	534.469	2405.52	-4.50077	0	50S ribosomal protein L5	Translation	Ribosomal proteins: synthesis and modification
57320	559.413	2106.34	-3.76527	0	50S ribosomal protein L24	Translation	Ribosomal proteins: synthesis and modification
57330	639.728	2230.84	-3.48717	0	50S ribosomal protein L14	Translation	Ribosomal proteins: synthesis and modification
57340	1405.53	4812.33	-3.42385	0	30S ribosomal protein S17	Translation	Ribosomal proteins: synthesis and modification
57350	727.853	2569.74	-3.53058	1.49893e-05	50S ribosomal protein L29	Translation	Ribosomal proteins: synthesis and modification
57360	363.595	1133.09	-3.11635	2.86371e-12	50S ribosomal protein L16	Translation	Ribosomal proteins: synthesis and modification
57370	201.278	501.324	-2.4907	9.41351e-11	30S ribosomal protein S3	Translation	Ribosomal proteins: synthesis and modification
57380	282.132	665.346	-2.35828	3.24935e-09	50S ribosomal protein L22	Translation	Ribosomal proteins: synthesis and modification
57390	824.209	1706.08	-2.06996	2.18738e-07	30S ribosomal protein S19	Translation	Ribosomal proteins: synthesis and modification
57400	199.298	431.37	-2.16445	5.08022e-08	50S ribosomal protein L2	Translation	Ribosomal proteins: synthesis and modification
57410	316.155	815.537	-2.57955	0.00274788	50S ribosomal protein L23	Translation	Ribosomal proteins: synthesis and modification
57420	277.625	694.919	-2.50309	1.63315e-08	50S ribosomal protein L4	Translation	Ribosomal proteins: synthesis and modification
57430	259.934	796.087	-3.06265	4.44089e-15	50S ribosomal protein L3	Translation	Ribosomal proteins: synthesis and modification
57440	9271.4	22433	-2.41959	3.26652e-10	unknown protein	Unknown
57460	5454.65	2423.11	2.25109	5.96094e-07	nitrogen regulatory protein P-II	Amino acid biosynthesis	Glutamate family / Nitrogen assimilation
57480	359.66	125.288	2.87067	1.0103e-13	hypothetical protein	Hypothetical
57490	307.893	173.012	1.7796	3.39408e-05	phosphoribosyltransferase	Other categories	Other
57500	2517.16	1589.31	1.58381	0.00143599	hypothetical protein	Hypothetical
57530	73.4711	105.088	-1.43033	0.0109166	acetyl-CoA carboxylase beta subunit	Fatty acid, phospholipid and sterol metabolism
57560	20.3953	50.8024	-2.49089	1.118e-06	phosphoribosylformylglycinamidine synthase PurL	Purines, pyrimidines, nucleosides, and nucleotides	Purine ribonucleotide biosynthesis
57580	1.79367	5.03852	-2.80906	0.0161403	cation efflux system protein	Transport and binding proteins
57590	16.6955	28.6177	-1.7141	0.00207981	dTDP-glucose 4,6-dehydratase	Cell envelope	Surface polysaccharides, lipopolysaccharides and antigens
57600	1627.21	2749.11	-1.68946	0.0012347	RNA-binding protein like	Other categories	Other
57610	161.625	283.83	-1.7561	6.01495e-05	GTP-binding protein	Other categories	Other
57760	28.8536	15.7784	1.82868	0.0119774	predicted nucleic acid-binding protein	Other categories	Other
57840	62.8606	37.689	1.66788	0.000285035	Proton extrusion protein PcxA	Other categories	Other
57860	106.658	44.5165	2.39592	2.50375e-06	hypothetical protein	Hypothetical
57870	146.668	71.6657	2.04656	2.8172e-06	putative hydrogenase expression/formation protein HypB	Other categories	Hydrogenase
57940	82.0845	53.8206	1.52515	0.00899662	hydrogenase subunit of the bidirectional hydrogenase	Other categories	Hydrogenase
58050	12.1089	5.41399	2.23659	3.30897e-06	tetratricopeptide TPR_2	Other categories	Other
58060	15.6823	5.08478	3.08416	4.48246e-08	hypothetical protein	Hypothetical
58140	6230.55	1658.39	3.75699	5.25807e-08	photosystem II D1 protein	Photosynthesis and respiration	Photosystem II
58180	164.27	88.5425	1.85527	9.02465e-06	similar to stage II sporulation protein D	Other categories	Other
58270	117.157	189.516	-1.61762	0.000503198	aldo/keto reductase family protein	Other categories	Other
58380	127.92	187.611	-1.46663	0.00549842	hypothetical protein	Hypothetical
58400	58.4163	84.5852	-1.44797	0.00728886	NADH dehydrogenase subunit 4 NdhD4	Photosynthesis and respiration	NADH dehydrogenase
58460	4.14541	2.47449	1.67526	0.00605104	hypothetical protein	Hypothetical
58570	84.7764	137	-1.61602	0.00375508	PilT protein-like protein	Other categories	Other
58600	214.896	147.831	1.45366	0.00952483	monoglucosyldiacylglycerol synthase	Other categories	Other
58730	74.487	109.278	-1.46707	0.0057457	peptide-chain-release factor 3	Translation	Protein modification and translation factors
58770	33.7902	10.1626	3.32496	0	hypothetical protein	Hypothetical
58780	34.1846	15.9084	2.14884	3.16664e-07	hypothetical protein	Hypothetical
58790	18.4672	8.48241	2.17712	2.40899e-05	unknown protein	Unknown
58800	40.5126	20.8788	1.94037	0.000871218	hypothetical protein	Hypothetical
58850	86.5894	54.4119	1.59137	0.000817164	long-chain-fatty-acid CoA ligase	Other categories	Other
58860	1334.82	2099.27	-1.5727	0.00335139	hypothetical protein	Hypothetical
58970	1279.21	700.292	1.82668	2.40089e-05	hypothetical protein	Hypothetical
58980	173.697	81.3878	2.13419	5.22478e-08	hypothetical protein	Hypothetical
58990	50.6014	23.6832	2.13659	2.80876e-07	hypothetical protein	Hypothetical
59060	15.6069	24.47	-1.5679	0.00495365	beta-carotene ketolase	Other categories	Other
59120	231.27	136.56	1.69354	0.000155594	hypothetical protein	Hypothetical
59130	102.974	38.0929	2.70323	2.63947e-05	nitrogen regulatory protein P-II	Other categories	Other
59140	70.2307	28.7026	2.44684	3.19418e-09	sodium-dependent bicarbonate transporter	Other categories	Other
59170	640.951	922.431	-1.43916	0.0136012	CP12 polypeptide	Other categories	Other
59180	1810.37	3605.36	-1.9915	5.10415e-05	hypothetical protein	Hypothetical
59200	67.528	38.6442	1.74743	0.00126001	hypothetical protein	Hypothetical
59220	93.9177	141.386	-1.50542	0.00402789	acetyl-coenzyme A synthetase	Energy metabolism	Pyruvate and acetyl-CoA metabolism
59230	6681.68	15425.2	-2.30858	1.62642e-07	photosystem subunit VII	Photosynthesis and respiration	Photosystem I
59340	30.1412	18.8078	1.60259	0.0101922	glutamine amidotransferase, class-II	Other categories	Other
59370	106.362	196.345	-1.84601	1.04486e-05	threonine synthase	Amino acid biosynthesis	Aspartate family
59400	39.4123	20.0387	1.96681	0.000226524	hypothetical protein	Hypothetical
59430	1060.64	209.812	5.05519	2.22045e-16	CAB/ELIP/HLIP superfamily protein	Other categories	Adaptations and atypical conditions
59630	247.243	165.334	1.49542	0.00401797	hypothetical protein	Hypothetical
59660	137.819	274.517	-1.99187	7.73338e-07	hypothetical protein	Hypothetical
59670	12533.3	5410.97	2.31628	1.8933e-09	hypothetical protein	Hypothetical
59680	34.1487	60.2951	-1.76566	9.13154e-05	UDP-N-acetylglucosamine pyrophosphorylase (EC 2.7.7.23)	Cell envelope	Murein sacculus and peptidoglycan
59800	74.9477	21.5433	3.47893	0	potassium-transporting P-type ATPase A chain	Transport and binding proteins
59820	35.0682	15.8563	2.21163	2.39633e-08	potassium-transporting P-type ATPase B chain	Other categories	Other
59830	24.5001	8.73902	2.80353	8.75755e-05	cytosine-specific methyltransferase	Other categories	Other
59840	46.3286	18.8141	2.46244	0.00448979	cytosine-specific methyltransferase	Other categories	Other
59930	9.17851	18.5501	-2.02104	7.76112e-05	phosphoadenosine phosphosulfate reductase	Other categories	Other
59960	166.479	247.636	-1.48749	0.00403282	putative methyltransferase	Other categories	Other
60060	40.4219	59.7888	-1.47912	0.00472721	ABC-transporter ATP-binding protein McnF	Transport and binding proteins
60070	71.1262	129.816	-1.82515	1.52539e-05	McnG protein	Other categories	Other
60140	76.0932	145.234	-1.90863	7.95065e-06	hypothetical protein	Hypothetical
60150	223.472	342.245	-1.53149	0.00366856	transposase	Other categories	Transposon-related functions
60350	46.5601	73.9861	-1.58905	0.00165083	transposase	Other categories	Transposon-related functions
60380	165.325	103.283	1.6007	0.000986502	beta-lactamase-like protein	Other categories	Other
60490	28.0665	18.2556	1.53742	0.00219365	hemolysin-type calcium-binding region protein	Other categories	Other
60610	13.1973	6.24523	2.11318	0.00637303	hypothetical protein	Hypothetical
60660	73.7021	154.536	-2.09677	2.28126e-06	zinc-binding CMP/dCMP deaminase	Other categories	Other
60680	19.1725	62.0446	-3.23612	1.82159e-10	cobalamin biosynthesis protein M	Biosynthesis of cofactors, prosthetic groups, and carriers	Cobalamin, heme, phycobilin and porphyrin
60750	571.379	112.016	5.10087	0	PBS lyase heat-like repeat	Other categories	Other
60790	76.8128	54.106	1.41967	0.0126574	WD-repeat protein	Other categories	Other
60830	157.628	99.6941	1.58112	0.00165221	glycoside hydrolase family 57	Other categories	Other
60940	21.1377	14.1858	1.49006	0.00981618	N-acetylmuramoyl-L-alanine amidase	Cell envelope	Murein sacculus and peptidoglycan
60960	53.3542	19.8328	2.6902	1.9551e-12	phosphotransacetylase	Other categories	Other
61100	30.5891	49.7484	-1.62634	0.00246419	hypothetical protein	Hypothetical
61180	48.2068	81.7338	-1.69548	0.000215252	TPR repeat protein	Other categories	Other
61200	52.4604	105.028	-2.00204	1.13773e-05	ATP phosphoribosyltransferase	Amino acid biosynthesis	Aromatic amino acid family
61230	47.1294	75.4639	-1.60121	0.00337669	deoxyribose-phosphate aldolase	Purines, pyrimidines, nucleosides, and nucleotides	Interconversions and salvage of nucleosides and nucleotides
61240	123.678	72.4249	1.70767	0.000268751	aconitate hydratase	Other categories	Other
61250	46.9575	10.3974	4.51627	5.94232e-05	hypothetical protein	Hypothetical
61260	19.004	4.59244	4.13811	8.44156e-08	unknown protein	Unknown
61340	41.4556	14.9924	2.76511	0.00188852	hypothetical protein	Hypothetical
61450	117.571	35.6704	3.29604	0.000373303	hypothetical protein	Hypothetical
61490	71.8202	36.0809	1.99053	0.00484514	hypothetical protein	Hypothetical
61570	25.7271	10.8769	2.3653	8.54124e-10	magnesium protoporphyrin IX chelatase subunit H	Biosynthesis of cofactors, prosthetic groups, and carriers	Cobalamin, heme, phycobilin and porphyrin
61640	4.62644	1.57726	2.93321	2.88465e-05	putative hydrogenase expression/formation protein HypF	Other categories	Hydrogenase
61650	18.541	9.29677	1.99435	0.00384399	hypothetical protein	Hypothetical
61680	82.0011	134.7	-1.64266	0.000490531	inositol monophosphate family protein	Other categories	Other
61690	689.303	1035.77	-1.50263	0.0106262	pentose-5-phosphate-3-epimerase	Energy metabolism	Pentose phosphate pathway
61700	58.7683	32.0428	1.83406	0.0149238	hypothetical protein	Hypothetical
61770	399.588	167.825	2.38098	4.89979e-08	HNH nuclease	Other categories	Other
61820	302.433	590.787	-1.95345	8.04003e-05	transketolase	Other categories	Other
61840	2199.57	1209.32	1.81885	0.0159278	ClpB protein	Translation	Degradation of proteins, peptides, and glycopeptides
61890	29.2055	63.597	-2.17757	8.16732e-07	biliverdin reductase	Other categories	Other
61900	103.27	1290.85	-12.4998	0	hypothetical protein	Hypothetical
61920	10.001	2.21439	4.51637	1.36119e-05	unknown protein	Unknown
61930	84.6582	35.2349	2.40268	2.62558e-08	phage shock protein A	Other categories	Other
61950	24.1107	11.9903	2.01085	0.000153457	plasma membrane protein	Other categories	Other
61960	26.4157	60.0262	-2.27237	1.35383e-07	alanine dehydrogenase	Other categories	Other
61980	49.0705	94.4782	-1.92536	2.92065e-06	pyridine nucleotide transhydrogenase beta subunit	Biosynthesis of cofactors, prosthetic groups, and carriers	Nicotinate and nicotinamide
62000	111.822	173.396	-1.55064	0.001804	leucine aminopeptidase	Translation	Protein modification and translation factors
62010	332.877	545.785	-1.6396	0.000450224	transposase	Other categories	Transposon-related functions
62070	41.6739	75.227	-1.80513	0.00010922	transcriptional regulator	Regulatory functions
62080	142.528	291.053	-2.04208	0.00221698	sulfate permease family protein	Other categories	Other
62090	226.372	366.681	-1.61982	0.0011359	sodium-dependent bicarbonate transporter	Other categories	Other
62110	60.8462	133.176	-2.18873	5.0447e-08	Na+/H+ antiporter	Transport and binding proteins
62200	135.188	59.4684	2.27327	0.000464904	hypothetical protein	Hypothetical
62210	46.3634	22.7168	2.04093	0.00864014	hypothetical protein	Hypothetical
62230	187.801	94.3971	1.98948	1.04068e-06	hypothetical protein	Hypothetical
62250	83.6809	121.542	-1.45245	0.00859263	probable tRNA/rRNA methyltransferase	Other categories	Other
62430	58.7854	27.9764	2.10125	8.03237e-07	FkbM family methyltransferase	Other categories	Other
62440	36.0252	17.7751	2.02672	0.00491446	hypothetical protein	Hypothetical
62470	15.9144	50.6862	-3.18493	7.79599e-13	hypothetical protein	Hypothetical
62520	60.0597	90.1818	-1.50154	0.00395512	valyl-tRNA synthetase	Other categories	Other
62530	42.2461	73.4733	-1.73917	8.60011e-05	isocitrate dehydrogenase (NADP+) (EC 1.1.1.42)	Energy metabolism	TCA cycle
62540	97.7818	69.4678	1.40758	0.0132626	unknown protein	Unknown
62660	105.82	226.578	-2.14116	5.15629e-08	putative phosphoribosylaminoimidazole carboxylase catalytic subunit	Other categories	Other
62670	129.811	292.618	-2.25418	4.60089e-08	hypothetical protein	Hypothetical
62680	62.4195	109.454	-1.75352	9.29195e-05	dihydrodipicolinate synthase	Amino acid biosynthesis	Aspartate family
62690	99.1834	150.236	-1.51473	0.00290619	aspartate beta-semialdehyde dehydrogenese	Amino acid biosynthesis	Aspartate family
62700	48.7051	147.185	-3.02196	5.55112e-15	trigger factor	Cellular processes	Protein and peptide secretion
62770	173.215	337.032	-1.94574	6.48308e-05	hypothetical protein	Hypothetical
62780	283.183	676.106	-2.38752	2.37778e-09	putative peroxiredoxin	Other categories	Other
62790	254.641	720.86	-2.83089	2.26819e-12	HNH endonuclease	Other categories	Other
62810	1297.54	2744.51	-2.11516	6.71713e-07	hypothetical protein	Hypothetical
62820	1107.15	1992.13	-1.79933	5.49794e-05	hypothetical protein	Hypothetical
62900	391.24	147.559	2.65141	0.0010425	hypothetical protein	Hypothetical
62910	92.364	63.6515	1.45109	0.0112838	putative transcriptional regulator	Other categories	Other
62950	56.5659	29.9302	1.88993	1.45163e-05	hypothetical protein	Hypothetical
63100	16.9814	31.405	-1.84938	0.000372366	hypothetical protein	Hypothetical
